# Supplementary material for: SLAP reagents for the photocatalytic synthesis of C3/C5-substituted, N-unprotected selenomorpholines and 1,4-selenazepanes
Source: Royal Society of Chemistry journal article supplement (doi:10.1039/d0cc04471g), 2020-01-01
Supplement: d0cc04471g1.pdf [file d0cc04471g1.pdf]

**SLAP reagents for the photocatalytic synthesis of C3/C5-  
substituted, N-unprotected selenomorpholines and 1,4-  
selenazepanes**

Supporting Information

Contents

|                                                                                                                                 |      |
|---------------------------------------------------------------------------------------------------------------------------------|------|
| SLAP reagents for the photocatalytic synthesis of C3/C5-substituted, N-unprotected selenomorpholines and 1,4-selenazepanes..... | 1    |
| 1. General Information.....                                                                                                     | 2    |
| 2. Optimization of Reaction Conditions .....                                                                                    | 3    |
| 3. Synthesis of Seleno-SLAP reagents.....                                                                                       | 5    |
| 4. Synthesis of aldehydes .....                                                                                                 | 9    |
| 5. Synthesis of Selenomorpholines and 1,4-selenazepanes .....                                                                   | 144  |
| 6. Scale-up Reaction of 7a .....                                                                                                | 266  |
| 7. Antifungal screening/Determination of MIC.....                                                                               | 277  |
| 8. Mechanism.....                                                                                                               | 29   |
| 9. References.....                                                                                                              | 300  |
| 10. NMR Spectra.....                                                                                                            | 311  |
| 11. HRMS Data .....                                                                                                             | 1044 |



## 1. General Information

Reactions with anhydrous solvents were carried out under N<sub>2</sub> atmosphere in oven-dried glassware. TLC plates were stained using potassium permanganate or ninhydrin solutions. Flash column chromatography was performed with silica gel (200-300 mesh). Petroleum ether (PE, b.p. 60-90 °C), ethyl acetate (EA) and methanol (MeOH) are used for column purification. All the N-heterocyclic compounds were purified by silica gel column chromatography with appropriate eluents with 0.1% NEt<sub>3</sub> v/v.

Commercial grade reagents and solvents were used without further purification except as indicated below. Anhydrous acetonitrile (MeCN), dichloromethane (DCM) and tetrahydrofuran (THF) were dried and purified by passing through a neutral alumina column under N<sub>2</sub> (solvent purification system). Cu(OTf)<sub>2</sub> was purchased from STREM Chemicals Inc.

<sup>1</sup>H NMR, <sup>13</sup>C NMR and <sup>19</sup>F NMR spectra were recorded on a Bruker Avance spectrometers (400 MHz or 600 MHz for <sup>1</sup>H NMR, and 101 MHz or 151 MHz for <sup>13</sup>C NMR). <sup>1</sup>H NMR chemical shifts are expressed in parts per million (δ) downfield from tetramethylsilane (with the CDCl<sub>3</sub> peak at 7.26 ppm used as a standard). <sup>13</sup>C NMR chemical shifts are expressed in parts per million (δ) downfield from tetramethylsilane (with the central peak of CDCl<sub>3</sub> at 77.16 ppm used as a standard). All <sup>13</sup>C spectra were measured with complete proton decoupling. NMR coupling constants (*J*) are reported in Hertz (Hz), and splitting patterns are indicated as follows: br, broad; s, singlet; d, doublet; dd, doublet of doublet; ddd, double of doublet of doublet; dt, doublet of triplet; td, triplet of doublet; t, triplet; q, quartet; m, multiplet. High Resolution Mass Spectrometric data was recorded on Bruker 1290 UPLC / microTOF-Q II and Q Exactive HF (Q Exactive™ HF/UltiMate™ 3000 RSLCnano). Low Resolution Mass Spectrometric data were recorded on Shimadzu LCMS-8040 (ESI).



## 2. Optimization of Reaction Conditions

For optimization studies, we selected seleno-SLAP 1 and 4-(trifluoromethyl)benzaldehyde as a substrate. Condensation of seleno-SLAP 1 with the above-mentioned aldehyde in the presence of 4 Å molecular sieves produced the corresponding imine (Table S1). The reaction was filtered and concentrated, and then the crude mixture was used directly without any further purification for optimization of the photo-mediated selenomorpholine formation reaction. <sup>1</sup>H NMR measurements of the crude reaction mixtures were used to calculate the yields from the optimization studies. Initially, we tried the standard reaction conditions, i.e. using 1 mol% of Ir[(ppy)<sub>2</sub>dtbbpy]PF<sub>6</sub>, in acetonitrile (0.1 M) at room temperature under blue light. However, no product was formed, suggesting that the oxidation potential of the Ir(III) photoredox catalyst was not sufficient enough for seleno-SLAP 1 to form the challenging selenomorpholine from a silyl selenide. Rest of the conditions were discussed in the article.

**Table S1:** Screening and optimization of reaction conditions with imine.

| Entry <sup>[a]</sup> | Lewis acids                                                                                                                                                                                           | Yield <sup>[b]</sup><br>(%)  |
|----------------------|-------------------------------------------------------------------------------------------------------------------------------------------------------------------------------------------------------|------------------------------|
| 1                    | Without Lewis acids                                                                                                                                                                                   | N.R.                         |
| 2                    | 2 Equiv of Fe(OTf) <sub>3</sub>                                                                                                                                                                       | N.R.                         |
| 3                    | 2 Equiv of Lewis acids, such as Sc(OTf) <sub>3</sub> , In(OTf) <sub>3</sub> , Er(OTf) <sub>3</sub> , Yb(OTf) <sub>3</sub> or Bi(OTf) <sub>3</sub>                                                     | <10%                         |
| 4                    | 2 Equiv of other Ni or Cu source, such as NiCl <sub>2</sub> ·6H <sub>2</sub> O, Ni(cod) <sub>2</sub> , Cu(acac) <sub>2</sub> , Cu(OAc) <sub>2</sub> , Cu(NO <sub>3</sub> ) <sub>2</sub> , CuCl or CuI | NR                           |
| 5                    | Cu(OTf) <sub>2</sub> (2.0 equiv)                                                                                                                                                                      | 52                           |
| 6                    | Cu(OTf) <sub>2</sub> (1.0 equiv)                                                                                                                                                                      | 35                           |
| 7                    | Cu(OTf) <sub>2</sub> (1.5 equiv)                                                                                                                                                                      | 41                           |
| 8                    | <b>Cu(OTf)<sub>2</sub> (1.0 equiv) + In(OTf)<sub>3</sub> (0.5 equiv)</b>                                                                                                                              | <b>65 (56)<sup>[c]</sup></b> |
| 9                    | Cu(OTf) <sub>2</sub> (1.0 equiv) + Gd(OTf) <sub>3</sub> (0.5 equiv)                                                                                                                                   | <10                          |
| 10                   | Cu(OTf) <sub>2</sub> (1.0 equiv) + Er(OTf) <sub>3</sub> (0.5 equiv)                                                                                                                                   | 22                           |
| 11                   | Cu(OTf) <sub>2</sub> (1.0 equiv) + Yb(OTf) <sub>3</sub> (0.5 equiv)                                                                                                                                   | 27                           |
| 12                   | Cu(OTf) <sub>2</sub> (1.0 equiv) + Bi(OTf) <sub>3</sub> (0.5 equiv)                                                                                                                                   | 45                           |
| 13 <sup>[d]</sup>    | Cu(OTf) <sub>2</sub> (1.0 equiv) + In(OTf) <sub>3</sub> (0.5 equiv)                                                                                                                                   | 57                           |

[a] All reactions were performed on a 0.1 mmol scale; [b] Yield determined by <sup>1</sup>H NMR spectroscopy with benzyl methyl ether as an internal standard; [c] Isolated yield; [d] Reaction performed for 36 h. N.R. = no reaction.



**Table S2:** Optimization of reaction conditions for 1,4-selenazepanes.

| <p>Seleno-SLAP 4</p> <p>Imine formation</p> <p>Cyclization</p> <p>6e</p> |                                                                                                                        |                          |
|--------------------------------------------------------------------------|------------------------------------------------------------------------------------------------------------------------|--------------------------|
| Entry <sup>[a]</sup>                                                     | Lewis acids                                                                                                            | Yield <sup>[b]</sup> (%) |
| 1                                                                        | 2 Equiv of Lewis acids, such as Ce(OTf) <sub>3</sub> , La(OTf) <sub>3</sub> , Nd(OTf) <sub>3</sub> , InCl <sub>3</sub> | N.R.                     |
| 2                                                                        | 2 Equiv of non-metallic Lewis acids, such as BF <sub>3</sub> ·MeCN, BBr <sub>3</sub> , TMSOTf                          | N.R.                     |
| 3                                                                        | Cu(OTf) <sub>2</sub> (1.0 equiv) + Ce(OTf) <sub>3</sub> (1.0 equiv)                                                    | N.R.                     |
| 4                                                                        | Cu(OTf) <sub>2</sub> (1.0 equiv) + La(OTf) <sub>3</sub> (1.0 equiv)                                                    | N.R.                     |
| 5                                                                        | Cu(OTf) <sub>2</sub> (1.0 equiv) + Nd(OTf) <sub>3</sub> (1.0 equiv)                                                    | N.R.                     |
| 6                                                                        | Cu(OTf) <sub>2</sub> (1.0 equiv) + InCl <sub>3</sub> (1.0 equiv)                                                       | N.R.                     |
| 7                                                                        | Cu(OTf) <sub>2</sub> (1.0 equiv) + In(OTf) <sub>3</sub> (0.5 equiv)                                                    | 32%                      |
| 8                                                                        | Cu(OTf) <sub>2</sub> (1.0 equiv) + In(OTf) <sub>3</sub> (1.0 equiv)                                                    | 35%                      |
| <b>9</b>                                                                 | <b>Cu(OTf)<sub>2</sub> (1.0 equiv) + In(OTf)<sub>3</sub> (2.0 equiv)</b>                                               | <b>48%</b>               |
| 10                                                                       | Cu(OTf) <sub>2</sub> (1.0 equiv) + In(OTf) <sub>3</sub> (2.5 equiv)                                                    | 40%                      |

[a] All reactions were performed on a 0.1 mmol scale; [b] Yield determined by <sup>1</sup>H NMR spectroscopy with 1,3,5-Trimethoxybenzene as an internal standard; NR = no reaction.



### 3. Synthesis of Seleno-SLAP reagents

#### Synthesis of Seleno-SLAP 1

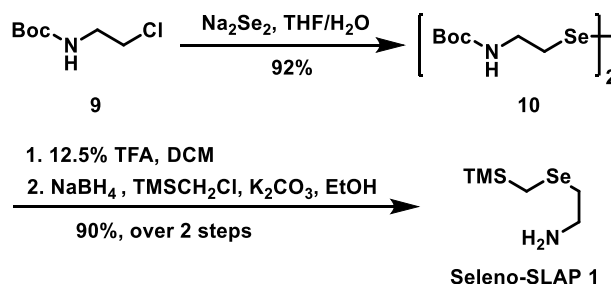

**Di-*tert*-butyl (diselanediyldis(ethane-2,1-diyl))dicarbamate (10).** To an ice-cooled solution of  $\text{Na}_2\text{Se}_2$ <sup>1</sup> (1 N, 18 mL, 18 mmol, 0.6 equiv) was added *tert*-butyl (2-chloroethyl)carbamate **9** (5.39 g, 30 mmol, 1.0 equiv) in THF (40 mL) dropwise. Then the reaction was stirred at room temperature overnight. The reaction was removed to a separating funnel and extracted with EA. The organic layer was then dried over  $\text{Na}_2\text{SO}_4$ . The solvent was evaporated in vacuo and purification of the crude compound by column chromatography (PE/EA, 4:1) to yield **10** as yellow solid (6.16 g, 92%). <sup>1</sup>H NMR (400 MHz,  $\text{CDCl}_3$ )  $\delta$  5.07 (br s, 2H), 3.47 (q,  $J$  = 6.1 Hz, 4H), 2.99 (t,  $J$  = 6.6 Hz, 4H), 1.44 (s, 18H). <sup>13</sup>C NMR (101 MHz,  $\text{CDCl}_3$ )  $\delta$  155.9, 79.7, 41.1, 29.6, 28.5. Spectral data matches with the literature data.<sup>2</sup>

**2-(((Trimethylsilyl)methyl)selanyl)ethan-1-amine (Seleno-SLAP 1).** To an ice-cooled solution of diselenide **10** (9.00 g, 20 mmol, 1.0 equiv) in DCM (72 mL) was slowly added a mixture of DCM/TFA (3:1, v/v, 72 mL) and then the mixture was stirred for 4 h at room temperature. After the reaction, the solvent was evaporated under vacuum and most TFA was removed. Then deprotected diselenide was dissolved in EtOH (100 mL) and triethylamine was used to neutralize the remaining TFA. The yellow solution was degassed for 15 min and then cooled to 0 °C.  $\text{NaBH}_4$  (1.68 g, 44 mmol, 2.2 equiv) was added slowly under  $\text{N}_2$  and the mixture was stirred at 0 °C for 20 min. (Chloromethyl)trimethylsilane (5.4 g, 44 mmol, 2.2 equiv) and  $\text{K}_2\text{CO}_3$  (2.76 g, 20 mmol, 1.0 equiv) were added and the reaction was heated to 50 °C for 4 h. Then the reaction was filtered and concentrated in vacuo. The resulting mixture was purified by column chromatography (PE/EA, 1:1) to give **Seleno-SLAP 1** as white solid (7.57 g, 90%). <sup>1</sup>H NMR (400 MHz,  $\text{CDCl}_3$ )  $\delta$  7.75 (s, 2H), 3.17 (t,  $J$  = 7.3 Hz, 2H), 2.75 (t,  $J$  = 7.2 Hz, 2H), 1.73 (s, 2H), 0.09 (s, 9H). <sup>13</sup>C NMR (101 MHz,  $\text{CDCl}_3$ )  $\delta$  39.3, 22.7, 9.0, -1.3. ESI-HRMS calcd for  $\text{C}_6\text{H}_{18}\text{NSeSi}$  [ $\text{M} + \text{H}$ ] 212.0368, found 212.0374.



## Synthesis of Seleno-SLAP 2

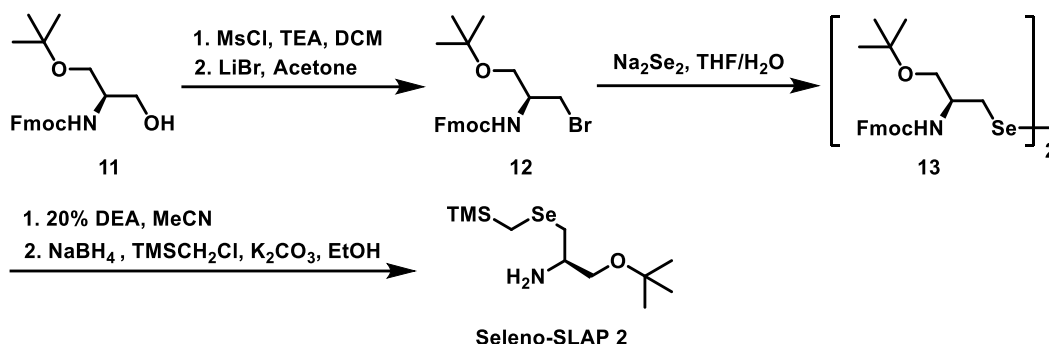

**(9H-fluoren-9-yl)methyl (S)-(1-bromo-3-(tert-butoxy)propan-2-yl)carbamate (12).** To a solution of alcohol (prepared as reported methods)<sup>3</sup> (3.69 g, 10 mmol, 1.0 equiv) in DCM (30 mL) was added methanesulfonyl chloride (0.85 mL, 11 mmol, 1.1 equiv) dropwise at 0 °C in an ice bath and then triethylamine (1.66 mL, 12 mmol, 1.2 equiv) was added. The resulting solution was stirred for 2 h, lithium bromide (8.7 g, 100 mmol, 10.0 equiv) and acetone (15 mL) were added to the solution at 0 °C and then left to stir at room temperature overnight. The solvents were removed and the residue was dissolved in EA and poured into a separation funnel. The organic layer was washed with H<sub>2</sub>O, saturated NaHCO<sub>3</sub> and brine. The organic layer was then dried over Na<sub>2</sub>SO<sub>4</sub>. The solvent was evaporated in vacuo and directly used for next step.

**Bis((9H-fluoren-9-yl)methyl ((2S,2'S)-diselanediy)bis(3-(tert-butoxy)propane-1,2-diyl))dicarbamate (13).** To an ice-cooled solution of Na<sub>2</sub>Se<sub>2</sub> (1 N, 10 mL) was added bromide in THF (30 mL) dropwise. Then the reaction was stirred at room temperature overnight. The reaction was removed to a separating funnel and extracted with DCM. The organic layer was then dried over Na<sub>2</sub>SO<sub>4</sub>. The solvent was evaporated in vacuo and flush through a pad of silica. The solvent was then concentrated and directly used for next step. ESI-HRMS calcd for C<sub>44</sub>H<sub>52</sub>N<sub>2</sub>O<sub>6</sub>Se<sub>2</sub>Na [M + Na] 887.2048, found 887.2083.

**(R)-1-(tert-Butoxy)-3-(((trimethylsilyl)methyl)selanyl)propan-2-amine (Seleno-SLAP 2).** To an ice-cooled solution of diselenide in MeCN (20 mL) was added diethylamine (5 mL) and then the mixture was stirred for 3 h at room temperature. After the reaction was completed, the solvent was evaporated under vacuum. Then deprotected diselenide was dissolved in EtOH (50 mL), the yellow solution was degassed for 15 min and then cooled to 0 °C. NaBH<sub>4</sub> (0.42 g, 11 mmol, 2.2 equiv) was added slowly under N<sub>2</sub> and the mixture was stirred at 0 °C for 20 min. (Chloromethyl)trimethylsilane (1.35 g, 11 mmol, 2.2 equiv) and K<sub>2</sub>CO<sub>3</sub> (1.38 g, 10 mmol, 1.0 equiv) were added and the reaction was heated to 50 °C for 4 h. Then the reaction was filtered and concentrated in vacuo. The



resulting mixture was purified by column chromatography (PE/EA, 4:1 to 2:1) to give **Seleno-SLAP 2** as colorless oil (1.92 g, 65%, calculated from alcohol).  $^1\text{H}$  NMR (400 MHz,  $\text{CDCl}_3$ )  $\delta$  3.30 (dd,  $J = 8.6, 4.4$  Hz, 1H), 3.16 (dd,  $J = 8.5, 6.7$  Hz, 1H), 3.01 – 2.92 (m, 1H), 2.65 (dd,  $J = 12.3, 4.7$  Hz, 1H), 2.42 (dd,  $J = 12.3, 8.1$  Hz, 1H), 1.66 (q,  $J = 12.2$  Hz, 4H), 1.11 (s, 9H), 0.02 (s, 9H).  $^{13}\text{C}$  NMR (101 MHz,  $\text{CDCl}_3$ )  $\delta$  72.8, 66.1, 50.9, 32.6, 27.6, 9.3, -1.3. ESI-HRMS calcd for  $\text{C}_{11}\text{H}_{28}\text{NOSeSi}$  [ $\text{M} + \text{H}$ ] 298.1100, found 298.1107.

### Synthesis of Seleno-SLAP 3

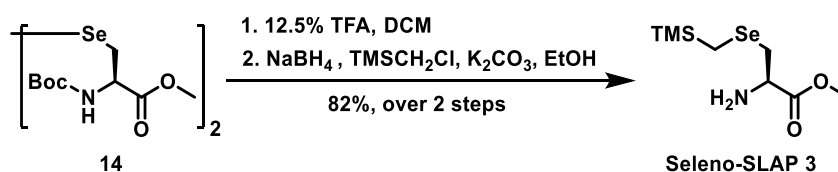

**Methyl (*R*)-2-amino-3-(((trimethylsilyl)methyl)selanyl)propanoate (Seleno-SLAP 3).** To an ice-cooled solution of diselenide **14**<sup>2</sup> (2.82 g, 5 mmol, 1.0 equiv) in DCM (12 mL) was slowly added a mixture of DCM/TFA (3:1, v/v, 12 mL) and then the mixture was stirred for 4 h at room temperature. After the reaction, the solvent was evaporated under vacuum and most TFA was removed. Then deprotected diselenide was dissolved in EtOH (25 mL) and triethylamine was used to neutralize the remaining TFA. The yellow solution was degassed for 15 min and then cooled to 0 °C.  $\text{NaBH}_4$  (0.42 g, 11 mmol, 2.2 equiv) was added slowly under  $\text{N}_2$  and the mixture was stirred at 0 °C for 20 min. (Chloromethyl)trimethylsilane (1.35 g, 11 mmol, 2.2 equiv) and  $\text{K}_2\text{CO}_3$  (0.69 g, 5 mmol, 1.0 equiv) were added and the reaction was heated to 50 °C for 4 h. Then the reaction was filtered and concentrated in vacuo. The resulting mixture was purified by column chromatography (PE/EA, 5:1 to 2:1) to give **Seleno-SLAP 3** as yellow oil (2.2 g, 82%).  $^1\text{H}$  NMR (600 MHz,  $\text{CDCl}_3$ )  $\delta$  3.70 (s, 3H), 3.66 (dd,  $J = 7.5, 4.8$  Hz, 1H), 2.89 (dd,  $J = 12.5, 4.8$  Hz, 1H), 2.79 (dd,  $J = 12.5, 7.5$  Hz, 1H), 1.80 – 1.70 (m, 4H), 0.06 (s, 9H).  $^{13}\text{C}$  NMR (151 MHz,  $\text{CDCl}_3$ )  $\delta$  174.7, 54.4, 52.2, 32.1, 9.8, -1.3. ESI-HRMS calcd for  $\text{C}_8\text{H}_{20}\text{NO}_2\text{SeSi}$  [ $\text{M} + \text{H}$ ] 270.0423, found 270.0431.

### Synthesis of Seleno-SLAP 4

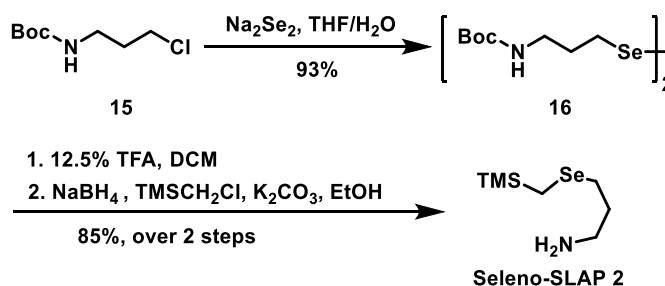



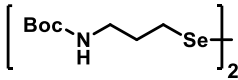
**Di-tert-butyl (diselanediylbis(propane-3,1-diyl))dicarbamate (16).** To an ice-cooled solution of Na<sub>2</sub>Se<sub>2</sub> (1 N, 18 mL, 18 mmol, 0.6 equiv) was added *tert*-butyl (3-chloropropyl)carbamate **15** (5.81 g, 30 mmol, 1.0 equiv) in THF (40 mL) dropwise. Then the reaction was stirred at room temperature overnight. The reaction was removed to a separating funnel and extracted with EA. The organic layer was then dried over Na<sub>2</sub>SO<sub>4</sub>. The solvent was evaporated in vacuo and purification of the crude compound by column chromatography (PE/EA, 4:1) to yield **16** as yellow solid (6.64 g, 93%). <sup>1</sup>H NMR (400 MHz, CDCl<sub>3</sub>) δ 4.73 (s, 2H), 3.20 (q, *J* = 6.6 Hz, 4H), 2.90 (t, *J* = 7.3 Hz, 4H), 1.91 (p, *J* = 7.0 Hz, 4H), 1.42 (s, 18H). <sup>13</sup>C NMR (101 MHz, CDCl<sub>3</sub>) δ 156.1, 79.3, 40.2, 31.5, 28.5, 26.8. ESI-HRMS calcd for C<sub>16</sub>H<sub>32</sub>N<sub>2</sub>NaO<sub>4</sub>Se<sub>2</sub> [*M* + Na] 499.0588, found 499.0596.

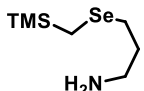
**3-(((Trimethylsilyl)methyl)selanyl)propan-1-amine (Seleno-SLAP 4).** To an ice-cooled solution of diselenide **16** (4.76 g, 10 mmol, 1.0 equiv) in DCM (36 mL) was slowly added a mixture of DCM/TFA (3:1, v/v, 36 mL) and then the mixture was stirred for 4 h at room temperature. After the reaction, the solvent was evaporated under vacuum and most TFA was removed. Then deprotected diselenide was dissolved in EtOH (50 mL) and triethylamine was used to neutralize the remaining TFA. The yellow solution was degassed for 15 min and then cooled to 0 °C. NaBH<sub>4</sub> (0.84 g, 22 mmol, 2.2 equiv) was added slowly under N<sub>2</sub> and the mixture was stirred at 0 °C for 20 min. (Chloromethyl)trimethylsilane (2.70 g, 22 mmol, 2.2 equiv) and K<sub>2</sub>CO<sub>3</sub> (1.38 g, 10 mmol, 1.0 equiv) were added and the reaction was heated to 50 °C for 4 h. Then the reaction was filtered and concentrated in vacuo. The resulting mixture was purified by column chromatography (PE/EA, 1:1) to give **Seleno-SLAP 4** as brown solid (3.81 g, 85%). <sup>1</sup>H NMR (400 MHz, CDCl<sub>3</sub>) δ 6.18 (s, 2H), 3.04 – 2.98 (m, 2H), 2.58 (t, *J* = 7.1 Hz, 2H), 1.99 (p, *J* = 7.1 Hz, 2H), 1.71 (s, 2H), 0.08 (s, 9H). <sup>13</sup>C NMR (101 MHz, CDCl<sub>3</sub>) δ 40.2, 28.2, 22.6, 8.9, -1.2. ESI-HRMS calcd for C<sub>7</sub>H<sub>20</sub>NSeSi [*M* + H] 226.0525, found 226.0533.

### Synthesis of Seleno-SLAP 5

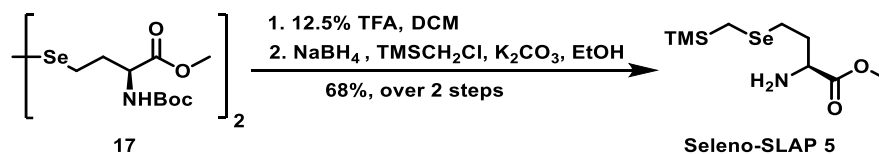

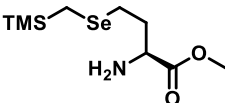
**Methyl (*S*)-2-amino-4-(((trimethylsilyl)methyl)selanyl)butanoate (Seleno-SLAP 5).** To an ice-cooled solution of diselenide **17**<sup>2</sup> (2.96 g, 5 mmol, 1.0 equiv) in DCM (12 mL) was slowly added a mixture of DCM/TFA (3:1, v/v, 12 mL) and then the mixture was stirred for 4 h at room temperature. After the reaction, the solvent was evaporated under vacuum and most TFA was removed. Then deprotected diselenide was dissolved in EtOH (25 mL) and triethylamine was used to neutralize the remaining TFA. The yellow



solution was degassed for 15 min and then cooled to 0 °C. NaBH<sub>4</sub> (0.42 g, 11 mmol, 2.2 equiv) was added slowly under N<sub>2</sub> and the mixture was stirred at 0 °C for 20 min. (Chloromethyl)trimethylsilane (1.35 g, 11 mmol, 2.2 equiv) and K<sub>2</sub>CO<sub>3</sub> (0.69 g, 5 mmol, 1.0 equiv) were added and the reaction was heated to 50 °C for 4 h. Then the reaction was filtered and concentrated in vacuo. The resulting mixture was purified by column chromatography (PE/EA, 5:1 to 2:1) to give **Seleno-SLAP 5** as yellow oil (1.92 g, 68%). <sup>1</sup>H NMR (400 MHz, CDCl<sub>3</sub>) δ 3.70 (s, 3H), 3.56 (dd, *J* = 8.1, 5.0 Hz, 1H), 2.69 – 2.56 (m, 2H), 2.12 – 2.01 (m, 1H), 1.90 – 1.80 (m, 1H), 1.70 (d, *J* = 1.1 Hz, 2H), 1.54 (s, 2H), 0.07 (s, 9H). <sup>13</sup>C NMR (101 MHz, CDCl<sub>3</sub>) δ 176.3, 54.4, 52.2, 35.1, 22.6, 8.8, -1.2. ESI-HRMS calcd for C<sub>9</sub>H<sub>22</sub>NO<sub>2</sub>SeSi [M + H] 284.0580, found 284.0587.

#### 4. Synthesis of aldehydes

##### Synthesis of 20

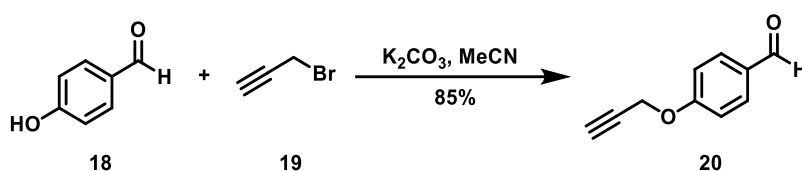

**4-(Prop-2-yn-1-yloxy)benzaldehyde (20).** To a solution of 4-hydroxybenzaldehyde (0.25 g, 2 mmol, 1.0 equiv) and anhydrous K<sub>2</sub>CO<sub>3</sub> (0.28 g, 2 mmol, 1.0 equiv) in 10 mL acetone was added propargyl bromide (0.36 g, 3 mmol, 1.5 equiv). The resulting mixture was heated under reflux for 6 h, then the remaining solution was filtered and washed with acetone. After concentration, the residue was purified by column chromatography (PE/EA, 10:1) to give **20** as a white solid (0.27 g, 85%). <sup>1</sup>H NMR (400 MHz, CDCl<sub>3</sub>) δ 9.91 (s, 1H), 7.90 – 7.83 (m, 2H), 7.12 – 7.06 (m, 2H), 4.78 (d, *J* = 2.4 Hz, 2H), 2.57 (t, *J* = 2.4 Hz, 1H). <sup>13</sup>C NMR (101 MHz, CDCl<sub>3</sub>) δ 190.9, 162.5, 132.0, 130.7, 115.3, 77.7, 76.5, 56.1. Spectral data matches with the literature data.<sup>4</sup>

##### Synthesis of 22

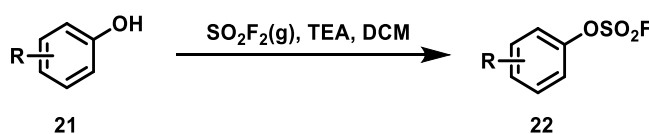

Aryl Fluorosulfonates are synthesized followed the reported method.

**General procedure:** In a 25 mL flask equipped with a stirring bar, phenol **21** (2 mmol, 1.0 equiv) and triethylamine were dissolved in 10 mL DCM. SO<sub>2</sub>F<sub>2</sub> was introduced by bubbling through the solution. The reaction was stirred for 4-12 h at room temperature before concentrating under vacuum. The residue was purified by column chromatography to give pure products.



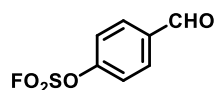

**4-Formylphenyl sulfurofluoridate (22a).** Colorless yellow oil, 0.39 g, 95%.  $^1\text{H}$  NMR (600 MHz,  $\text{CDCl}_3$ )  $\delta$  10.05 (s, 1H), 8.05 – 8.00 (m, 2H), 7.55 – 7.50 (m, 2H).  $^{13}\text{C}$  NMR (151 MHz,  $\text{CDCl}_3$ )  $\delta$  190.2, 153.6, 136.2, 132.0, 121.9.  $^{19}\text{F}$  NMR (376 MHz,  $\text{CDCl}_3$ )  $\delta$  39.1.

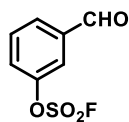

**3-Formylphenyl sulfurofluoridate (22b).** Light yellow oil, 0.37 g, 90%.  $^1\text{H}$  NMR (400 MHz,  $\text{CDCl}_3$ )  $\delta$  10.04 (s, 1H), 7.95 (dt,  $J$  = 7.5, 1.3 Hz, 1H), 7.86 (dt,  $J$  = 2.4, 1.1 Hz, 1H), 7.70 (t,  $J$  = 7.9 Hz, 1H), 7.61 (ddt,  $J$  = 8.2, 2.2, 1.0 Hz, 1H).  $^{13}\text{C}$  NMR (101 MHz,  $\text{CDCl}_3$ )  $\delta$  189.9, 150.6, 138.6, 131.5, 130.2, 126.8, 121.3.  $^{19}\text{F}$  NMR (376 MHz,  $\text{CDCl}_3$ )  $\delta$  38.5.

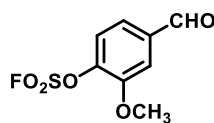

**4-Formyl-2-methoxyphenyl sulfurofluoridate (22c).** White solid, 0.38 g, 82%.  $^1\text{H}$  NMR (400 MHz,  $\text{CDCl}_3$ )  $\delta$  9.99 (s, 1H), 7.58 (d,  $J$  = 1.5 Hz, 1H), 7.55 – 7.49 (m, 2H), 4.00 (s, 3H).  $^{13}\text{C}$  NMR (101 MHz,  $\text{CDCl}_3$ )  $\delta$  190.4, 152.2, 142.9, 137.2, 124.1, 123.3, 112.2, 56.7.  $^{19}\text{F}$  NMR (376 MHz,  $\text{CDCl}_3$ )  $\delta$  41.0. Spectral data matches with the literature data.<sup>5</sup>

### Synthesis of 24

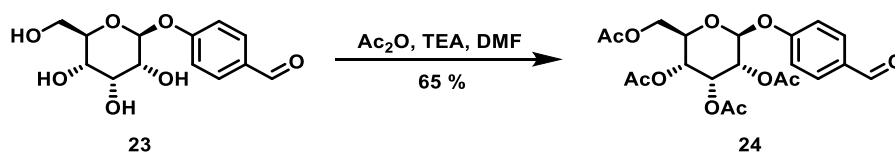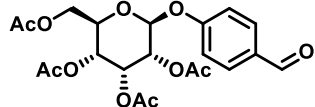

**(2R,3R,4R,5R,6S)-2-(acetoxymethyl)-6-(4-formylphenoxy)tetrahydro-2H-pyran-3,4,5-triyl triacetate (24).** To a solution of helicid **23** (1.0 g, 3.5 mmol, 1.0 equiv) in dry DMF (8 mL) were added acetic anhydride (1.79 g, 17.5 mmol, 5.0 equiv) and triethylamine (1.48 g, 14.7 mmol, 4.2 equiv) under stirring at 0 °C. The resulting mixture was stirred for 2 h at 0 °C, then for 12 h at room temperature. The reaction mixture was diluted with water and extracted with EA. The combined organic phase was washed with brine, dried over  $\text{Na}_2\text{SO}_4$  and the solvent was removed under reduced pressure to give light yellow solid. The crude product was recrystallized in ethanol to yield **24** as white solid (1.03 g, 65%).  $^1\text{H}$  NMR (400 MHz,  $\text{CDCl}_3$ )  $\delta$  9.92 (s, 1H), 7.89 – 7.81 (m, 2H), 7.16 – 7.09 (m, 2H), 5.75 (t,  $J$  = 3.0 Hz, 1H), 5.47 (d,  $J$  = 8.1 Hz, 1H), 5.19 (dd,  $J$  = 8.1, 3.1 Hz, 1H), 5.05 (dd,  $J$  = 9.8, 2.8 Hz, 1H), 4.33 – 4.19 (m, 3H), 2.17 (s, 3H), 2.07 (s, 3H), 2.04 (s, 3H), 2.03 (s, 3H).  $^{13}\text{C}$  NMR (101 MHz,  $\text{CDCl}_3$ )  $\delta$  191.2, 170.8, 170.6, 170.5, 169.8, 161.7, 132.3, 117.2, 99.0, 71.8, 71.1, 68.8, 67.2, 61.8, 21.2, 21.1, 21.0. Spectral data matches with the literature data.<sup>6</sup>



### Synthesis of 27

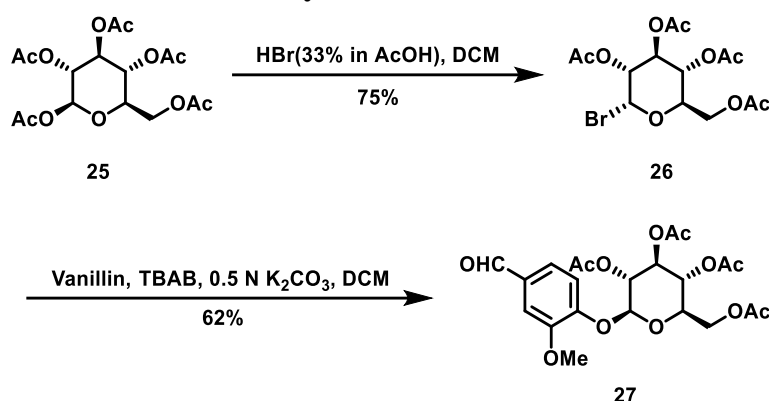

**(2*R*,3*R*,4*S*,5*R*,6*R*)-2-(acetoxymethyl)-6-bromotetrahydro-2*H*-pyran-3,4,5-triyl triacetate (26).** To the solution of β-D-Glucose pentaacetate (3.90 g, 10 mmol, 1.0 equiv) in anhydrous DCM (30 mL) was added HBr (33% w/w in acetic acid, 20 mL) dropwise under N<sub>2</sub> at 0 °C. The reaction was warmed to room temperature and stirred overnight. The reaction mixture was neutralized by saturated NaHCO<sub>3</sub> solution and product was extracted with EA, dried over Na<sub>2</sub>SO<sub>4</sub>, filtered and concentrated. The residue was purified by column chromatography (PE/EA 3:1) to give pure product **26** (3.08 g, 75%) as white solid. <sup>1</sup>H NMR (400 MHz, CDCl<sub>3</sub>) δ 6.60 (d, *J* = 4.2 Hz, 1H), 5.56 (t, *J* = 9.9 Hz, 1H), 5.16 (t, *J* = 9.9 Hz, 1H), 4.84 (dd, *J* = 10.0, 4.2 Hz, 1H), 4.34 – 4.29 (m, 2H), 4.14 – 4.10 (m, 1H), 2.10 (s, 3H), 2.09 (s, 3H), 2.05 (s, 3H), 2.03 (s, 3H). <sup>13</sup>C NMR (101 MHz, CDCl<sub>3</sub>) δ 170.7, 170.0, 169.9, 169.6, 86.7, 72.3, 70.7, 70.3, 67.3, 61.1, 20.8, 20.8, 20.8, 20.7. Spectral data matches with the literature data.<sup>7</sup>

**(2*R*,3*R*,4*S*,5*R*,6*S*)-2-(acetoxymethyl)-6-(4-formyl-2-methoxyphenoxy)tetrahydro-2*H*-pyran-3,4,5-triyl triacetate (27).** Vanillin (0.46 g, 3 mmol, 1.0 equiv), bromide **26** (1.85 g, 4.5 mmol, 1.5 equiv) and tetrabutylammonium bromide (0.48 g, 1.5 mmol, 0.5 equiv) were dissolved in dichloromethane (10 mL). Potassium carbonate solution (0.5 N, 10 mL) was added and the mixture was stirred vigorously for 3h at 45 °C. Ethyl acetate (30 mL) was added, and the organic phase was washed subsequently three times with water, brine, dried over Na<sub>2</sub>SO<sub>4</sub>, filtered and concentrated. The residue was purified twice by crystallization from ethanol to yield **27** as a white solid (0.90 g, 62%). <sup>1</sup>H NMR (400 MHz, CDCl<sub>3</sub>) δ 9.89 (s, 1H), 7.45 – 7.39 (m, 2H), 7.21 (d, *J* = 7.9 Hz, 1H), 5.33 – 5.29 (m, 2H), 5.20 – 5.14 (m, 1H), 5.12 – 5.09 (m, 1H), 4.27 (dd, *J* = 12.3, 5.2 Hz, 1H), 4.18 (dd, *J* = 12.3, 2.6 Hz, 1H), 3.89 (s, 3H), 3.85 (ddd, *J* = 10.0, 5.1, 2.6 Hz, 1H), 2.07 (s, 3H), 2.07 (s, 3H), 2.04 (s, 3H), 2.04 (s, 3H). <sup>13</sup>C NMR (101 MHz, CDCl<sub>3</sub>) δ 191.0, 170.6, 170.4, 169.5, 169.4, 151.2, 151.1, 133.0, 125.5, 118.3, 110.9, 99.9, 72.5, 72.4, 71.2, 68.4, 62.0, 56.3, 20.8, 20.8, 20.7, 20.7. Spectral data matches with the literature data.<sup>8</sup>



## Synthesis of 30

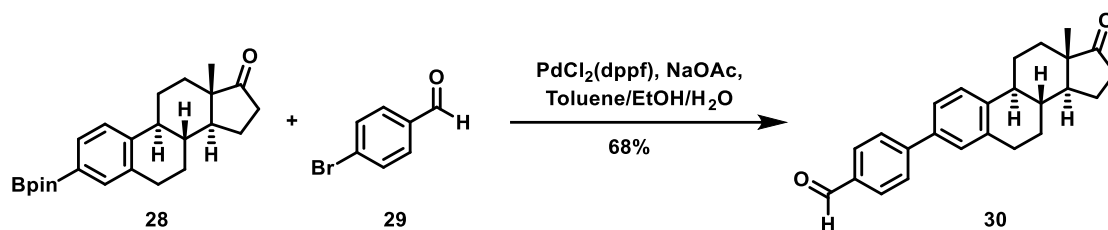

**4-((8*R*,9*S*,13*S*,14*S*)-13-methyl-17-oxo-7,8,9,11,12,13,14,15,16,17-decahydro-6*H*-cyclopenta[*a*]phenanthren-3-yl)benzaldehyde (30).** To a 35 mL of sealed tube were added estrone boronic ester<sup>9</sup> (1.14 g, 3 mmol, 1.0 equiv), 4-bromobenzaldehyde (0.56 g, 3 mmol, 1.0 equiv), NaOAc (0.74 g, 9 mmol, 3.0 equiv), and Pd(dppf)Cl<sub>2</sub> (88 mg, 0.12 mmol, 0.04 equiv) under N<sub>2</sub>, followed by toluene:EtOH:H<sub>2</sub>O (15 mL) with stirring. The sealed tube was screw capped and heated to 100 °C (oil bath). After stirring for 8 h, the reaction mixture was cooled to room temperature, filtered through a pad of celite and concentrated. The residue was purified by column chromatography to give **30** as yellow solid (0.73 g, 68%). <sup>1</sup>H NMR (400 MHz, CDCl<sub>3</sub>) δ 10.04 (s, 1H), 7.94 (d, *J* = 8.4 Hz, 2H), 7.74 (d, *J* = 8.2 Hz, 2H), 7.47 – 7.37 (m, 3H), 3.05 – 2.98 (m, 2H), 2.58 – 2.45 (m, 2H), 2.37 (td, *J* = 10.9, 3.8 Hz, 1H), 2.23 – 1.97 (m, 4H), 1.72 – 1.63 (m, 2H), 1.61 – 1.47 (m, 4H), 0.93 (s, 3H). <sup>13</sup>C NMR (101 MHz, CDCl<sub>3</sub>) δ 220.8, 192.0, 147.2, 140.5, 137.4, 137.3, 135.2, 130.4, 128.1, 127.6, 126.3, 124.9, 50.7, 48.1, 44.6, 38.3, 36.0, 31.7, 29.7, 26.6, 25.9, 21.7, 14.0. ESI-HRMS calcd for C<sub>25</sub>H<sub>26</sub>NaO<sub>2</sub> [M + Na] 381.1825, found 381.1829.

## Synthesis of 34

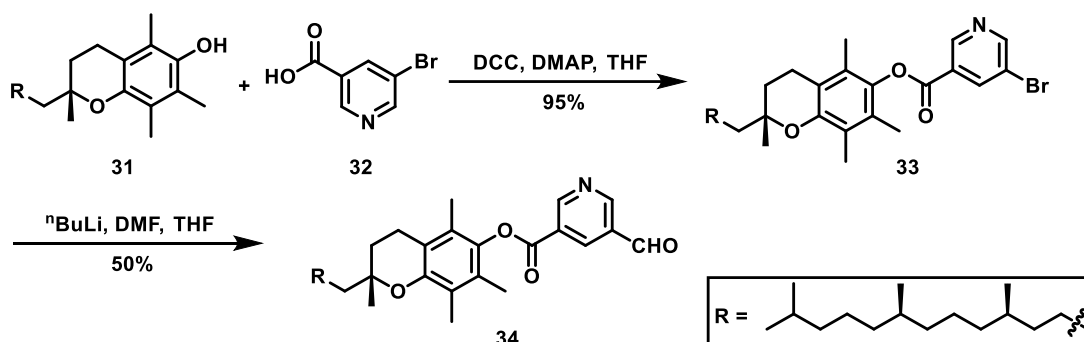

**(*R*)-2,5,7,8-tetramethyl-2-((4*R*,8*R*)-4,8,12-trimethyltridecyl)chroman-6-yl 5-bromonicotinate (33).** To a solution of vitamin E **31** (2.15 g, 5 mmol, 1.0 equiv) in dry THF (25 mL) were added 5-



bromo-nicotinic acid (1.11 g, 5.5 mmol, 1.1 equiv), DCC (1.24 g, 6.0 mmol, 1.2 equiv) and DMAP (0.06 g, 0.5 mmol, 0.1 equiv). The resulting mixture was filtered and washed with THF. The solvent was removed under reduced pressure and the residue was purified by column chromatography to give **33** as yellow oil (2.92 g, 95%). <sup>1</sup>H NMR (400 MHz, CDCl<sub>3</sub>) δ 9.35 (d, *J* = 1.8 Hz, 1H), 8.93 (d, *J* = 2.3 Hz, 1H), 8.62 (t, *J* = 2.1 Hz, 1H), 2.63 (t, *J* = 6.8 Hz, 2H), 2.13 (s, 3H), 2.06 (s, 3H), 2.01 (s, 3H), 1.83 (dq, *J* = 14.4, 6.9 Hz, 2H), 1.59 – 1.10 (m, 24H), 0.87 (t, *J* = 6.6 Hz, 12H). <sup>13</sup>C NMR (101 MHz, CDCl<sub>3</sub>) δ 162.8, 155.1, 150.0, 149.4, 140.3, 140.1, 127.1, 126.7, 125.0, 123.5, 121.0, 117.8, 75.4, 37.7 – 37.4 (m), 33.0 – 32.8 (m), 28.1, 25.0, 25.0, 24.6, 22.9, 22.8, 21.2, 20.8, 20.0 – 19.7 (m), 13.2, 12.4, 12.0. ESI-HRMS calcd for C<sub>35</sub>H<sub>52</sub>BrNNaO<sub>3</sub> [*M* + Na] 636.3023, found 636.3025.

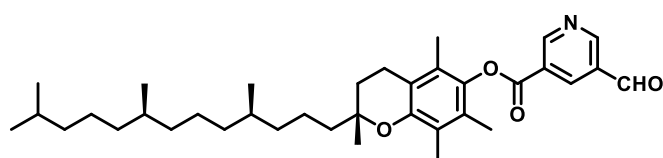

**(*R*)-2,5,7,8-tetramethyl-2-((4*R*,8*R*)-4,8,12-trimethyltridecyl)chroman-6-yl 5-formylnicotinate (**34**).** To a

solution of **33** (1.85 g, 3 mmol, 1.0 equiv) in dry THF (30 mL) at -110 °C was added <sup>n</sup>BuLi 1.6 M in hexanes (1.97 mL, 3.15 mmol, 1.05 equiv) dropwise. After 5 min, dry DMF (0.47 mL, 6 mmol, 2 equiv) was added and stirred for another 30 min. The resulting mixture was quenched and extracted with EA. The solvent was removed under reduced pressure and the residue was purified by column chromatography to give **34** as yellow solid (0.85 g, 50%). <sup>1</sup>H NMR (400 MHz, CDCl<sub>3</sub>) δ 10.24 (s, 1H), 9.64 (d, *J* = 2.1 Hz, 1H), 9.33 (d, *J* = 2.1 Hz, 1H), 8.93 (t, *J* = 2.1 Hz, 1H), 2.63 (t, *J* = 6.8 Hz, 2H), 2.13 (s, 3H), 2.06 (s, 3H), 2.02 (s, 3H), 1.83 (dd, *J* = 14.2, 7.1 Hz, 2H), 1.45 – 1.11 (m, 24H), 0.86 (t, *J* = 6.6 Hz, 12H). <sup>13</sup>C NMR (101 MHz, CDCl<sub>3</sub>) δ 189.9, 163.0, 155.8, 155.1, 150.0, 140.3, 137.9, 131.4, 126.7, 126.5, 125.0, 123.6, 117.9, 75.4, 39.5, 37.7 – 37.4 (m), 33.0 – 32.8 (m), 28.1, 25.0, 25.0, 24.6, 22.9, 22.8, 21.2, 20.8, 20.0 – 19.7 (m), 13.3, 12.4, 12.0. ESI-HRMS calcd for C<sub>36</sub>H<sub>53</sub>NNaO<sub>4</sub> [*M* + Na] 586.3867, found 586.3846.



## 5. Synthesis of Selenomorpholines and 1,4-selenazepanes

### General procedure for imine formation:

To a 10 mL oven-dried tube were added SLAP reagent (0.25 mmol, 1.00 equiv), the corresponding aldehyde (0.25 mmol, 1.00 equiv) and MS 4Å (ca. 100 mg/mmol). The tube was sealed with rubber stopper, exchanged the gas using N<sub>2</sub> for 3 times and then dry DCM (1.5 mL) was added. The reaction mixture was stirred at room temperature for 12 h and filtered through a HPLC filter. The filtrate was concentrated under reduced pressure to afford the imine and used directly for photo-cyclization.

### General procedure for ketimine formation:

To a 10 mL oven-dried tube were added SLAP reagent (0.25 mmol, 1.00 equiv), the corresponding ketone (0.25 mmol, 1.00 equiv) and titanium(IV) isopropoxide (0.11 mL, 1.50 equiv). The tube was sealed with rubber stopper, exchanged the gas using N<sub>2</sub> for 3 times and then dry DCM (1.0 mL) was added. The reaction mixture was stirred at room temperature for 12 h and concentrated under reduced pressure to afford the ketimine and used directly for photo-cyclization.

### General procedure for photo-cyclization:

To a solution of the corresponding imine or ketimine (0.25 mmol, 1.00 equiv) in dry MeCN (2.5 mL, 0.05 M), Cu(OTf)<sub>2</sub> (90.4 mg, 0.25 mmol, 1.00 equiv), In(OTf)<sub>3</sub> (0.5 equiv or 2.0 equiv), and Ir[(ppy)<sub>2</sub>dtbbpy]PF<sub>6</sub> (2.3 mg, 2.50 μmol, 0.01 equiv) were added. For the N-containing heterocyclic aldehydes, additional BF<sub>3</sub>•MeCN (0.2 mL/equiv, N+1 equiv) was added to the reaction. The reaction was stirred for 24 (for selenomorpholines synthesis) or 48 h (for 1,4-selenazepanes synthesis) at room temperature under the exposure of blue LEDs (30 W) with a cooling fan to maintain the temperature. NH<sub>4</sub>OH (2 mL) was added and the mixture was extracted with DCM (10 mL x 3). The combined organic layers were washed with brine (5 mL), dried over Na<sub>2</sub>SO<sub>4</sub>, filtered and concentrated. The residue was purified by flash column chromatography to afford the desired product.

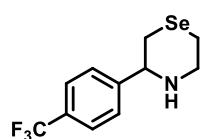

**3-(4-(Trifluoromethyl)phenyl)selenomorpholine (3a).** Purification by flash column chromatography (PE/EA, 2:1) afforded **3a** (41 mg, 56% yield) as white solid. <sup>1</sup>H NMR (400 MHz, CDCl<sub>3</sub>) δ 7.59 (d, *J* = 8.1 Hz, 2H), 7.48 (d, *J* = 8.1 Hz, 2H), 4.08 (d, *J* = 10.6 Hz, 1H), 3.63 (dt, *J* = 12.6, 3.4 Hz, 1H), 3.28 (td, *J* = 12.4, 2.1 Hz, 1H), 3.05 – 2.87 (m, 2H), 2.44 (d, *J* = 12.2 Hz, 2H), 1.73 (s, 1H). <sup>13</sup>C NMR (101 MHz, CDCl<sub>3</sub>) δ 149.0, 130.0 (q, *J* = 32.4 Hz), 126.9, 125.8 (q, *J* = 3.8 Hz), 124.2 (q, *J* = 272.0 Hz), 63.2, 50.0, 24.7, 18.3. <sup>19</sup>F NMR (376 MHz, CDCl<sub>3</sub>) δ -62.5. Spectral data matches with the literature data.<sup>2</sup>

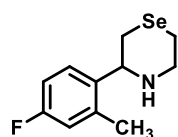

**3-(4-Fluoro-2-methylphenyl)selenomorpholine (3b).** Purification by flash column chromatography (PE/EA, 3:1) afforded **3b** (27 mg, 41% yield) as colorless oil. <sup>1</sup>H NMR (400 MHz, CDCl<sub>3</sub>) δ 7.42 (dd, *J* = 8.5, 6.0 Hz, 1H), 6.96 – 6.81 (m, 2H), 4.16 (dd, *J* = 10.8, 2.1 Hz, 1H), 3.63



(dt,  $J = 12.6, 3.1$  Hz, 1H), 3.27 (td,  $J = 12.3, 2.3$  Hz, 1H), 2.99 (td,  $J = 12.1, 3.1$  Hz, 1H), 2.89 (dd,  $J = 12.0, 10.7$  Hz, 1H), 2.50 – 2.32 (m, 5H), 1.64 (s, 1H).  $^{13}\text{C}$  NMR (101 MHz,  $\text{CDCl}_3$ )  $\delta$  161.7 (d,  $J = 245.3$  Hz), 139.1 (d,  $J = 3.2$  Hz), 137.2 (d,  $J = 7.6$  Hz), 127.2 (d,  $J = 8.3$  Hz), 117.1 (d,  $J = 20.9$  Hz), 113.1 (d,  $J = 20.6$  Hz), 58.9, 50.5, 23.9, 19.5 (d,  $J = 1.7$  Hz), 18.4.  $^{19}\text{F}$  NMR (376 MHz,  $\text{CDCl}_3$ )  $\delta$  -116.0. ESI-HRMS calcd for  $\text{C}_{11}\text{H}_{15}\text{FNSe}$  [ $\text{M} + \text{H}$ ] 260.0348, found 260.0351.

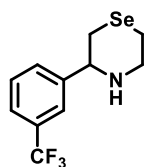

**3-(3-(Trifluoromethyl)phenyl)selenomorpholine (3c).** Purification by flash column chromatography (PE/EA, 3:1) afforded **3c** (38 mg, 52% yield) as light yellow oil.  $^1\text{H}$  NMR (600 MHz,  $\text{CDCl}_3$ )  $\delta$  7.64 (s, 1H), 7.54 (t,  $J = 8.0$  Hz, 2H), 7.45 (t,  $J = 7.7$  Hz, 1H), 4.09 (dd,  $J = 10.9, 2.2$  Hz, 1H), 3.63 (dt,  $J = 12.5, 3.2$  Hz, 1H), 3.28 (td,  $J = 12.4, 2.2$  Hz, 1H), 3.00 (td,  $J = 12.1, 3.1$  Hz, 1H), 2.95 (dd,  $J = 12.1, 10.9$  Hz, 1H), 2.48 – 2.42 (m, 2H), 1.77 (s, 1H).  $^{13}\text{C}$  NMR (151 MHz,  $\text{CDCl}_3$ )  $\delta$  146.1, 131.2 (q,  $J = 32.3$  Hz), 130.1, 129.3, 124.7 (q,  $J = 3.8$  Hz), 124.2 (q,  $J = 271.6$  Hz), 123.4 (q,  $J = 3.8$  Hz), 63.2, 50.0, 24.8, 18.3.  $^{19}\text{F}$  NMR (376 MHz,  $\text{CDCl}_3$ )  $\delta$  -62.6. ESI-HRMS calcd for  $\text{C}_{11}\text{H}_{13}\text{F}_3\text{NSe}$  [ $\text{M} + \text{H}$ ] 296.0160, found 296.0169.

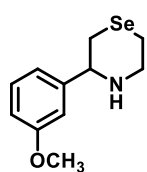

**3-(3-Methoxyphenyl)selenomorpholine (3d).** Purification by flash column chromatography (PE/EA, 3:1) afforded **3d** (27 mg, 42% yield) as light yellow oil.  $^1\text{H}$  NMR (400 MHz,  $\text{CDCl}_3$ )  $\delta$  7.26 – 7.21 (m, 1H), 6.97 – 6.89 (m, 2H), 6.81 (ddd,  $J = 8.3, 2.5, 1.0$  Hz, 1H), 3.99 (dd,  $J = 10.9, 2.0$  Hz, 1H), 3.80 (s, 3H), 3.61 (dt,  $J = 12.5, 3.3$  Hz, 1H), 3.26 (td,  $J = 12.3, 2.2$  Hz, 1H), 3.04 – 2.93 (m, 2H), 2.49 – 2.39 (m, 2H), 1.78 (s, 1H).  $^{13}\text{C}$  NMR (101 MHz,  $\text{CDCl}_3$ )  $\delta$  160.0, 146.8, 129.8, 118.9, 113.3, 111.9, 63.7, 55.4, 50.2, 24.9, 18.3. ESI-HRMS calcd for  $\text{C}_{11}\text{H}_{16}\text{NOSe}$  [ $\text{M} + \text{H}$ ] 258.0392, found 258.0400.

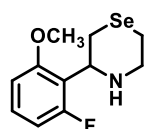

**3-(2-Fluoro-6-methoxyphenyl)selenomorpholine (3e).** Purification by flash column chromatography (PE/EA, 3:1) afforded **3e** (14 mg, 20% yield) as light yellow oil.  $^1\text{H}$  NMR (400 MHz,  $\text{CDCl}_3$ )  $\delta$  7.18 – 7.11 (m, 1H), 6.69 – 6.63 (m, 2H), 4.65 (dd,  $J = 11.4, 2.5$  Hz, 1H), 3.84 (s, 3H), 3.70 – 3.63 (m, 1H), 3.32 – 3.21 (m, 2H), 2.81 (td,  $J = 12.4, 3.2$  Hz, 1H), 2.38 – 2.29 (m, 2H), 2.04 (s, 1H).  $^{13}\text{C}$  NMR (101 MHz,  $\text{CDCl}_3$ )  $\delta$  161.0 (d,  $J = 244.1$  Hz), 158.0 (d,  $J = 8.5$  Hz), 128.7 (d,  $J = 11.1$  Hz), 119.9 (d,  $J = 17.1$  Hz), 108.8 (d,  $J = 24.2$  Hz), 106.9 (d,  $J = 2.7$  Hz), 56.0, 53.8 (d,  $J = 2.9$  Hz), 49.3, 20.3 (d,  $J = 1.7$  Hz), 17.7.  $^{19}\text{F}$  NMR (376 MHz,  $\text{CDCl}_3$ )  $\delta$  -115.3. ESI-HRMS calcd for  $\text{C}_{11}\text{H}_{14}\text{FNNaOSe}$  [ $\text{M} + \text{Na}$ ] 298.0117, found 298.0127.

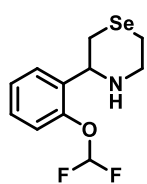

**3-(2-(Difluoromethoxy)phenyl)selenomorpholine (3f).** Purification by flash column chromatography (PE/EA, 3:1) afforded **3f** (26 mg, 36% yield) as colorless oil.  $^1\text{H}$  NMR (400 MHz,  $\text{CDCl}_3$ )  $\delta$  7.51 (dd,  $J = 7.6, 1.9$  Hz, 1H), 7.29 – 7.24 (m, 1H), 7.21 (td,  $J = 7.5, 1.4$  Hz, 1H), 7.10 (dd,  $J = 8.0, 1.3$  Hz, 1H), 6.57 (t,  $J = 73.7$  Hz, 1H), 4.40 (dd,  $J = 10.9, 2.2$  Hz, 1H), 3.61 (dt,  $J = 12.8, 3.0$  Hz, 1H), 3.29 (td,  $J = 12.5, 2.2$  Hz, 1H), 3.02 – 2.89 (m, 2H),



2.51 – 2.39 (m, 2H), 1.69 (s, 1H).  $^{13}\text{C}$  NMR (101 MHz,  $\text{CDCl}_3$ )  $\delta$  148.1, 136.4, 128.7, 127.6, 126.1, 119.1, 116.3 (t,  $J = 260.2$  Hz), 56.4, 50.1, 23.3, 18.3.  $^{19}\text{F}$  NMR (376 MHz,  $\text{CDCl}_3$ )  $\delta$  -80.3 (d,  $J = 6.8$  Hz). ESI-HRMS calcd for  $\text{C}_{11}\text{H}_{14}\text{F}_2\text{NOSe}$  [ $\text{M} + \text{H}$ ] 294.0203, found 294.0214.

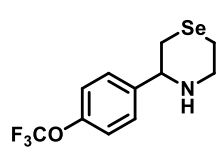

**3-(4-(Trifluoromethoxy)phenyl)selenomorpholine (3g).**

Purification by flash column chromatography (PE/EA, 2:1) afforded **3g** (46 mg, 59% yield) as colorless oil.  $^1\text{H}$  NMR (400 MHz,  $\text{CDCl}_3$ )  $\delta$  7.41 – 7.36 (m, 2H), 7.21 – 7.14 (m, 2H), 4.02 (dd,  $J = 10.9, 1.9$  Hz, 1H), 3.61 (dt,  $J = 12.7, 3.3$  Hz, 1H), 3.26 (td,  $J = 12.4, 2.1$  Hz, 1H), 3.03 – 2.89 (m, 2H), 2.50 – 2.37 (m, 2H), 1.75 (s, 1H).  $^{13}\text{C}$  NMR (101 MHz,  $\text{CDCl}_3$ )  $\delta$  148.6 (q,  $J = 1.8$  Hz), 143.9, 127.9, 121.3, 120.6 (q,  $J = 257.0$  Hz), 62.9, 50.1, 24.8, 18.3.  $^{19}\text{F}$  NMR (376 MHz,  $\text{CDCl}_3$ )  $\delta$  -57.9. Spectral data matches with the literature data.<sup>2</sup>

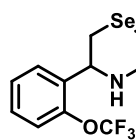

**3-(2-(Trifluoromethoxy)phenyl)selenomorpholine (3h).**

Purification by flash column chromatography (PE/EA, 3:1) afforded **3h** (30 mg, 39% yield) as light yellow oil.  $^1\text{H}$  NMR (400 MHz,  $\text{CDCl}_3$ )  $\delta$  7.59 – 7.54 (m, 1H), 7.31 – 7.27 (m, 2H), 7.25 – 7.20 (m, 1H), 4.39 (dd,  $J = 10.9, 2.1$  Hz, 1H), 3.64 – 3.57 (m, 1H), 3.29 (td,  $J = 12.4, 2.2$  Hz, 1H), 3.04 – 2.89 (m, 2H), 2.48 – 2.38 (m, 2H), 1.71 (s, 1H).  $^{13}\text{C}$  NMR (101 MHz,  $\text{CDCl}_3$ )  $\delta$  146.1 (q,  $J = 1.6$  Hz), 137.2, 128.8, 127.9, 127.5, 120.8 (q,  $J = 1.6$  Hz), 120.6 (q,  $J = 257.6$  Hz), 56.1, 50.2, 23.5, 18.3.  $^{19}\text{F}$  NMR (376 MHz,  $\text{CDCl}_3$ )  $\delta$  -57.1. ESI-HRMS calcd for  $\text{C}_{11}\text{H}_{13}\text{F}_3\text{NOSe}$  [ $\text{M} + \text{H}$ ] 312.0109, found 312.0112.

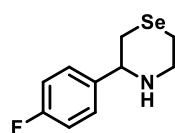

**3-(4-Fluorophenyl)selenomorpholine (3i).**

Purification by flash column chromatography (PE/EA, 2:1) afforded **3i** (34 mg, 55% yield) as colorless oil.  $^1\text{H}$  NMR (400 MHz,  $\text{CDCl}_3$ )  $\delta$  7.35 – 7.29 (m, 2H), 7.04 – 6.97 (m, 2H), 3.99 (dd,  $J = 10.9, 2.0$  Hz, 1H), 3.61 (dt,  $J = 12.0, 3.2$  Hz, 1H), 3.26 (td,  $J = 12.3, 2.2$  Hz, 1H), 3.02 – 2.89 (m, 2H), 2.48 – 2.35 (m, 2H), 1.75 (s, 1H).  $^{13}\text{C}$  NMR (101 MHz,  $\text{CDCl}_3$ )  $\delta$  162.2 (d,  $J = 245.8$  Hz), 141.0 (d,  $J = 3.0$  Hz), 128.1 (d,  $J = 8.0$  Hz), 115.5 (d,  $J = 21.1$  Hz), 62.9, 50.2, 25.0, 18.3.  $^{19}\text{F}$  NMR (376 MHz,  $\text{CDCl}_3$ )  $\delta$  -114.7. Spectral data matches with the literature data.<sup>2</sup>

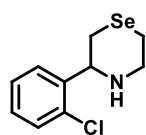

**3-(2-Chlorophenyl)selenomorpholine (3j).**

Purification by flash column chromatography (PE/EA, 3:1) afforded **3j** (26 mg, 40% yield) as colorless oil.  $^1\text{H}$  NMR (400 MHz,  $\text{CDCl}_3$ )  $\delta$  7.53 (dd,  $J = 7.8, 1.8$  Hz, 1H), 7.35 (dd,  $J = 7.9, 1.5$  Hz, 1H), 7.26 (td,  $J = 7.5, 1.4$  Hz, 1H), 7.20 (td,  $J = 7.6, 1.8$  Hz, 1H), 4.47 (dd,  $J = 10.7, 2.2$  Hz, 1H), 3.64 (dt,  $J = 12.6, 3.2$  Hz, 1H), 3.32 (td,  $J = 12.3, 2.2$  Hz, 1H), 3.00 (td,  $J = 12.1, 3.1$  Hz, 1H), 2.91 – 2.81 (m, 1H), 2.57 (d,  $J = 11.9$  Hz, 1H), 2.48 – 2.42 (m, 1H), 1.73 (s, 1H).  $^{13}\text{C}$  NMR (101 MHz,  $\text{CDCl}_3$ )  $\delta$  142.1, 132.7, 129.8, 128.6, 127.5, 127.2, 59.3, 50.3, 23.2, 18.4. ESI-HRMS calcd for  $\text{C}_{10}\text{H}_{13}\text{ClNSe}$  [ $\text{M} + \text{H}$ ] 261.9894, found 261.9873.



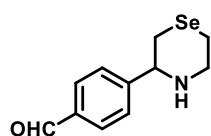

**4-(Selenomorpholin-3-yl)benzaldehyde (3k).** Purification by flash column chromatography (PE/EA, 3:1) afforded **3k** (32 mg, 50% yield) as light yellow solid.  $^1\text{H}$  NMR (400 MHz,  $\text{CDCl}_3$ )  $\delta$  9.99 (s, 1H), 7.85 (d,  $J = 8.3$  Hz, 2H), 7.53 (d,  $J = 8.2$  Hz, 2H), 4.11 (dd,  $J = 10.9, 2.0$  Hz, 1H), 3.64 (dt,  $J = 12.9, 3.1$  Hz, 1H), 3.28 (td,  $J = 12.3, 2.2$  Hz, 1H), 3.06 – 2.90 (m, 2H), 2.50 – 2.41 (m, 2H), 1.76 (s, 1H).  $^{13}\text{C}$  NMR (101 MHz,  $\text{CDCl}_3$ )  $\delta$  192.0, 151.7, 136.0, 130.4, 127.3, 63.4, 49.9, 24.6, 18.3. ESI-HRMS calcd for  $\text{C}_{11}\text{H}_{14}\text{NOSe}$  [ $\text{M} + \text{H}$ ] 256.0235, found 256.0240.

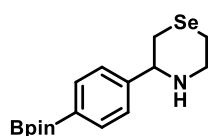

**3-(4-(4,4,5,5-Tetramethyl-1,3,2-dioxaborolan-2-yl)phenyl)selenomorpholine (3l).** Purification by flash column chromatography (PE/EA, 4:1) afforded **3l** (35 mg, 40% yield) as white solid.  $^1\text{H}$  NMR (400 MHz,  $\text{CDCl}_3$ )  $\delta$  7.78 (d,  $J = 8.0$  Hz, 2H), 7.36 (d,  $J = 8.0$  Hz, 2H), 4.02 (dd,  $J = 10.9, 1.9$  Hz, 1H), 3.61 (dt,  $J = 12.6, 3.0$  Hz, 1H), 3.26 (td,  $J = 12.3, 2.2$  Hz, 1H), 3.04 – 2.91 (m, 2H), 2.47 – 2.37 (m, 2H), 1.88 (s, 1H), 1.33 (s, 12H).  $^{13}\text{C}$  NMR (101 MHz,  $\text{CDCl}_3$ )  $\delta$  148.1, 135.3, 125.9, 83.9, 63.7, 50.1, 25.0, 25.0, 24.8, 18.2. ESI-HRMS calcd for  $\text{C}_{16}\text{H}_{25}\text{BNO}_2\text{Se}$  [ $\text{M} + \text{H}$ ] 354.1142, found 354.1156.

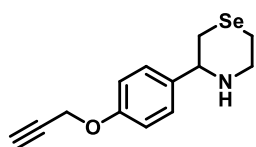

**3-(4-(Prop-2-yn-1-yloxy)phenyl)selenomorpholine (3m).** Purification by flash column chromatography (PE/EA, 3:1) afforded **3m** (25 mg, 35% yield) as light yellow oil.  $^1\text{H}$  NMR (400 MHz,  $\text{CDCl}_3$ )  $\delta$  7.28 (d,  $J = 8.6$  Hz, 2H), 6.93 (d,  $J = 8.7$  Hz, 2H), 4.68 (d,  $J = 2.4$  Hz, 2H), 3.96 (dd,  $J = 11.0, 2.1$  Hz, 1H), 3.61 (dt,  $J = 12.6, 3.2$  Hz, 1H), 3.26 (td,  $J = 12.3, 2.2$  Hz, 1H), 3.04 – 2.91 (m, 2H), 2.51 (t,  $J = 2.4$  Hz, 1H), 2.45 – 2.38 (m, 2H), 1.85 (s, 1H).  $^{13}\text{C}$  NMR (101 MHz,  $\text{CDCl}_3$ )  $\delta$  157.1, 138.5, 127.7, 115.1, 78.7, 75.7, 63.0, 56.0, 50.3, 25.0, 18.3. ESI-HRMS calcd for  $\text{C}_{13}\text{H}_{16}\text{NOSe}$  [ $\text{M} + \text{H}$ ] 282.0392, found 282.0403.

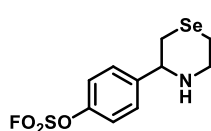

**4-(Selenomorpholin-3-yl)phenyl sulfurofluoridate (3n).** Purification by flash column chromatography (PE/EA, 3:1) afforded **3n** (46 mg, 56% yield) as light yellow oil.  $^1\text{H}$  NMR (400 MHz,  $\text{CDCl}_3$ )  $\delta$  7.51 – 7.46 (m, 2H), 7.33 – 7.28 (m, 2H), 4.06 (dd,  $J = 11.0, 2.1$  Hz, 1H), 3.62 (dt,  $J = 12.4, 3.3$  Hz, 1H), 3.27 (td,  $J = 12.3, 2.2$  Hz, 1H), 2.99 (td,  $J = 12.1, 3.1$  Hz, 1H), 2.91 (dd,  $J = 12.1, 10.9$  Hz, 1H), 2.50 – 2.37 (m, 2H), 1.71 (s, 1H).  $^{13}\text{C}$  NMR (101 MHz,  $\text{CDCl}_3$ )  $\delta$  149.3, 146.0, 128.6, 121.2, 62.8, 50.0, 24.8, 18.3.  $^{19}\text{F}$  NMR (376 MHz,  $\text{CDCl}_3$ )  $\delta$  37.6. ESI-HRMS calcd for  $\text{C}_{10}\text{H}_{13}\text{FNO}_3\text{SSe}$  [ $\text{M} + \text{H}$ ] 325.9760, found 325.9745.

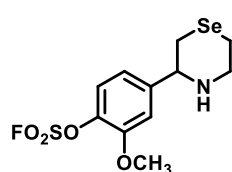

**2-Methoxy-4-(selenomorpholin-3-yl)phenyl sulfurofluoridate (3o).** Purification by flash column chromatography (PE/EA, 3:1) afforded **3o** (36 mg, 40% yield) as light yellow oil.  $^1\text{H}$  NMR (400 MHz,  $\text{CDCl}_3$ )  $\delta$  7.27 – 7.24 (m, 1H), 7.09 (d,  $J = 1.8$  Hz, 1H), 6.96 (dd,  $J = 8.4, 2.0$  Hz, 1H), 4.03 (dd,  $J = 10.9, 2.1$  Hz, 1H), 3.92 (s, 3H), 3.62 (dt,  $J = 12.6, 3.3$  Hz, 1H), 3.26 (td,  $J = 12.3, 2.2$  Hz, 1H), 2.99 (td,  $J = 12.2,$



3.1 Hz, 1H), 2.91 (dd,  $J = 12.2, 10.9$  Hz, 1H), 2.49 – 2.38 (m, 2H), 1.77 (s, 1H).  $^{13}\text{C}$  NMR (101 MHz,  $\text{CDCl}_3$ )  $\delta$  151.4, 147.2, 138.2, 122.5, 118.9, 111.5, 63.3, 56.4, 50.0, 24.9, 18.2.  $^{19}\text{F}$  NMR (376 MHz,  $\text{CDCl}_3$ )  $\delta$  39.7. ESI-HRMS calcd for  $\text{C}_{11}\text{H}_{15}\text{FNO}_4\text{SSe}$   $[\text{M} + \text{H}]$  355.9865, found 355.9874.

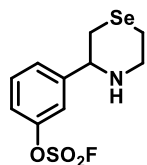

**3-(Selenomorpholin-3-yl)phenyl sulfurofluoridate (3p).** Purification by flash column chromatography (PE/EA, 3:1) afforded **3p** (41 mg, 50% yield) as light yellow oil.  $^1\text{H}$  NMR (400 MHz,  $\text{CDCl}_3$ )  $\delta$  7.46 – 7.37 (m, 3H), 7.26 – 7.23 (m, 1H), 4.08 (dd,  $J = 10.9, 2.0$  Hz, 1H), 3.63 (dt,  $J = 12.6, 3.1$  Hz, 1H), 3.27 (td,  $J = 12.4, 2.2$  Hz, 1H), 2.99 (td,  $J = 12.1, 3.1$  Hz, 1H), 2.94 – 2.87 (m, 1H), 2.51 – 2.38 (m, 2H), 1.74 (s, 1H).  $^{13}\text{C}$  NMR (101 MHz,  $\text{CDCl}_3$ )  $\delta$  150.4, 148.4, 130.7, 126.9, 120.1, 119.0, 62.8, 49.9, 24.7, 18.3.  $^{19}\text{F}$  NMR (376 MHz,  $\text{CDCl}_3$ )  $\delta$  37.9. ESI-HRMS calcd for  $\text{C}_{10}\text{H}_{13}\text{FNO}_3\text{SSe}$   $[\text{M} + \text{H}]$  325.9760, found 325.9745.

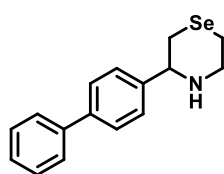

**3-([1,1'-Biphenyl]-4-yl)selenomorpholine (3q).** Purification by flash column chromatography (PE/EA, 3:1) afforded **3q** (46 mg, 61% yield) as white solid.  $^1\text{H}$  NMR (400 MHz,  $\text{CDCl}_3$ )  $\delta$  7.61 – 7.54 (m, 4H), 7.47 – 7.40 (m, 4H), 7.39 – 7.31 (m, 1H), 4.06 (dd,  $J = 11.0, 2.2$  Hz, 1H), 3.64 (dt,  $J = 12.6, 3.2$  Hz, 1H), 3.30 (td,  $J = 12.3, 2.3$  Hz, 1H), 3.02 (td,  $J = 12.2, 11.7, 2.5$  Hz, 2H), 2.55 – 2.39 (m, 2H), 1.84 (s, 1H).  $^{13}\text{C}$  NMR (101 MHz,  $\text{CDCl}_3$ )  $\delta$  144.2, 140.8, 140.7, 128.9, 127.5, 127.4, 127.2, 127.0, 63.3, 50.2, 24.9, 18.3. ESI-HRMS calcd for  $\text{C}_{16}\text{H}_{18}\text{NSe}$   $[\text{M} + \text{H}]$  304.0599, found 304.0606.

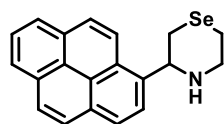

**3-(Pyren-1-yl)selenomorpholine (3r).** Purification by flash column chromatography (PE/EA, 3:1) afforded **3r** (32 mg, 36% yield) as yellow solid.  $^1\text{H}$  NMR (400 MHz,  $\text{CDCl}_3$ )  $\delta$  8.46 (d,  $J = 9.4$  Hz, 1H), 8.25 – 8.12 (m, 5H), 8.08 – 7.98 (m, 3H), 5.11 (dd,  $J = 10.8, 2.2$  Hz, 1H), 3.79 (dt,  $J = 12.5, 3.1$  Hz, 1H), 3.51 (td,  $J = 12.3, 2.3$  Hz, 1H), 3.26 (dd,  $J = 12.0, 10.9$  Hz, 1H), 3.17 (td,  $J = 12.1, 3.2$  Hz, 1H), 2.72 (d,  $J = 12.1$  Hz, 1H), 2.57 (dt,  $J = 12.4, 3.3$  Hz, 1H), 1.91 (s, 1H).  $^{13}\text{C}$  NMR (101 MHz,  $\text{CDCl}_3$ )  $\delta$  138.6, 131.5, 130.8, 130.8, 128.0, 127.7, 127.6, 127.4, 126.1, 125.4, 125.4, 125.2, 125.1, 123.5, 122.5, 59.9, 50.8, 24.8, 18.7. Spectral data matches with the literature data.<sup>2</sup>

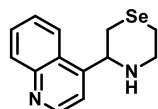

**3-(Quinolin-4-yl)selenomorpholine (3s).** Purification by flash column chromatography (DCM/EA/MeOH, 10:10:1) afforded **3s** (40 mg, 57% yield) as colorless oil.  $^1\text{H}$  NMR (400 MHz,  $\text{CDCl}_3$ )  $\delta$  8.89 (d,  $J = 4.5$  Hz, 1H), 8.15 (t,  $J = 8.8$  Hz, 2H), 7.73 (ddd,  $J = 8.3, 6.9, 1.3$  Hz, 1H), 7.59 (ddd,  $J = 8.3, 6.9, 1.3$  Hz, 1H), 7.55 (d,  $J = 4.5$  Hz, 1H), 4.82 (dd,  $J = 10.7, 1.8$  Hz, 1H), 3.73 (dt,  $J = 12.7, 3.1$  Hz, 1H), 3.40 (td,  $J = 12.4, 2.3$  Hz, 1H), 3.08 (td,  $J = 12.1, 3.2$  Hz, 1H), 3.00 (dd,  $J = 12.2, 10.8$  Hz, 1H), 2.65 (dt,  $J = 12.3, 1.8$  Hz, 1H), 2.55 – 2.49 (m, 1H), 1.86 (s, 1H).  $^{13}\text{C}$  NMR (101 MHz,  $\text{CDCl}_3$ )  $\delta$  150.8, 150.0, 148.7, 130.7, 129.4, 126.9, 125.7, 122.9, 117.4, 58.5, 50.3, 24.1, 18.7. ESI-LRMS:  $[\text{M} + \text{H}]^+$  279.15.



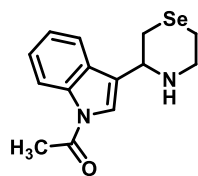

**1-(3-(Selenomorpholin-3-yl)-1H-indol-1-yl)ethan-1-one (3t).**

Purification by flash column chromatography (PE/EA, 3:1) afforded **3t** (46 mg, 60% yield) as brown oil.  $^1\text{H}$  NMR (400 MHz,  $\text{CDCl}_3$ )  $\delta$  8.43 (d,  $J = 8.0$  Hz, 1H), 7.64 (d,  $J = 7.5$  Hz, 1H), 7.41 – 7.33 (m, 2H), 7.29 (td,  $J = 7.6, 1.1$  Hz, 1H), 4.34 (dd,  $J = 10.8, 1.7$  Hz, 1H), 3.65 (dt,  $J = 12.6, 3.1$  Hz, 1H), 3.32 (td,  $J = 12.4, 2.2$  Hz, 1H), 3.07 – 2.94 (m, 2H), 2.67 (dt,  $J = 12.1, 1.7$  Hz, 1H), 2.59 (s, 3H), 2.52 – 2.46 (m, 1H), 1.95 (s, 1H).  $^{13}\text{C}$  NMR (101 MHz,  $\text{CDCl}_3$ )  $\delta$  168.7, 136.0, 128.6, 126.6, 125.7, 123.7, 121.1, 119.2, 117.0, 55.2, 50.1, 24.1, 18.6. ESI-HRMS calcd for  $\text{C}_{14}\text{H}_{17}\text{N}_2\text{OSe}$  [ $\text{M} + \text{H}$ ] 309.0501, found 309.0487.

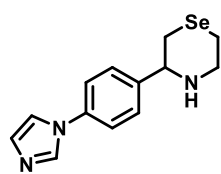

**3-(4-(1H-imidazol-1-yl)phenyl)selenomorpholine (3u).**

Purification by flash column chromatography (DCM/EA/MeOH, 5:5:1) afforded **3u** (45 mg, 62% yield) as white solid.  $^1\text{H}$  NMR (400 MHz,  $\text{CDCl}_3$ )  $\delta$  7.83 (t,  $J = 1.1$  Hz, 1H), 7.51 – 7.44 (m, 2H), 7.39 – 7.32 (m, 2H), 7.27 – 7.25 (m, 1H), 7.20 (t,  $J = 1.2$  Hz, 1H), 4.07 (dd,  $J = 10.9, 2.2$  Hz, 1H), 3.64 (dt,  $J = 12.8, 3.2$  Hz, 1H), 3.29 (td,  $J = 12.3, 2.3$  Hz, 1H), 3.04 – 2.92 (m, 2H), 2.51 – 2.41 (m, 2H), 1.83 (s, 1H).  $^{13}\text{C}$  NMR (101 MHz,  $\text{CDCl}_3$ )  $\delta$  144.6, 136.8, 135.7, 130.6, 128.1, 121.8, 118.3, 62.9, 50.1, 24.8, 18.3. ESI-HRMS calcd for  $\text{C}_{13}\text{H}_{16}\text{N}_3\text{Se}$  [ $\text{M} + \text{H}$ ] 294.0504, found 294.0517.

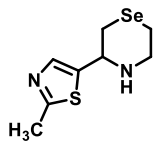

**2-Methyl-5-(selenomorpholin-3-yl)thiazole (3v).**

Purification by flash column chromatography (DCM/EA/MeOH, 10:10:1) afforded **3v** (40 mg, 65% yield) as light yellow oil.  $^1\text{H}$  NMR (400 MHz,  $\text{CDCl}_3$ )  $\delta$  7.48 (s, 1H), 4.31 (dd,  $J = 10.6, 2.2$  Hz, 1H), 3.59 (dt,  $J = 12.9, 3.2$  Hz, 1H), 3.30 – 3.20 (m, 1H), 2.92 (td,  $J = 12.0, 3.6$  Hz, 2H), 2.66 (s, 3H), 2.61 – 2.55 (m, 1H), 2.45 – 2.38 (m, 1H), 1.79 (s, 1H).  $^{13}\text{C}$  NMR (101 MHz,  $\text{CDCl}_3$ )  $\delta$  165.5, 142.6, 138.2, 56.1, 49.6, 25.1, 19.5, 18.2. ESI-LRMS: [ $\text{M} + \text{H}$ ] $^+$  249.15.

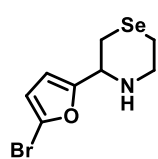

**3-(5-Bromofuran-2-yl)selenomorpholine (3w).**

Purification by flash column chromatography (PE/EA, 3:1) afforded **3w** (39 mg, 53% yield) as light yellow oil.  $^1\text{H}$  NMR (400 MHz,  $\text{CDCl}_3$ )  $\delta$  6.23 (d,  $J = 3.3$  Hz, 1H), 6.17 (dd,  $J = 3.3, 0.8$  Hz, 1H), 4.12 (dd,  $J = 10.6, 2.1$  Hz, 1H), 3.58 (dt,  $J = 13.0, 3.3$  Hz, 1H), 3.28 – 3.18 (m, 1H), 2.98 – 2.83 (m, 2H), 2.68 – 2.61 (m, 1H), 2.45 – 2.39 (m, 1H), 1.74 (s, 1H).  $^{13}\text{C}$  NMR (101 MHz,  $\text{CDCl}_3$ )  $\delta$  158.7, 120.9, 111.9, 107.7, 55.8, 48.9, 21.2, 18.3. ESI-HRMS calcd for  $\text{C}_8\text{H}_{11}\text{BrNOSe}$  [ $\text{M} + \text{H}$ ] 295.9180, found 295.9181.

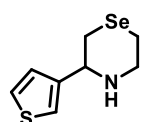

**3-(Thiophen-3-yl)selenomorpholine (3x).**

Purification by flash column chromatography (PE/EA, 3:1) afforded **3x** (26 mg, 45% yield) as light yellow oil.  $^1\text{H}$  NMR (400 MHz,  $\text{CDCl}_3$ )  $\delta$  7.28 (dd,  $J = 5.0, 3.0$  Hz, 1H), 7.21 – 7.16 (m, 1H), 7.07 (dd,  $J = 5.0, 1.1$  Hz, 1H), 4.15 (dd,  $J = 10.9, 2.2$  Hz, 1H), 3.61 (dt,  $J = 12.7, 3.2$  Hz, 1H), 3.25 (td,  $J = 12.4, 2.3$  Hz, 1H), 3.01 – 2.88 (m, 2H), 2.53 (d,  $J = 12.0$  Hz, 1H), 2.42 (d,  $J = 12.1$  Hz, 1H), 1.76 (s, 1H).  $^{13}\text{C}$  NMR (101



MHz, CDCl<sub>3</sub>)  $\delta$  146.2, 126.1, 126.0, 120.5, 58.9, 50.0, 24.5, 18.3. Spectral data matches with the literature data.<sup>2</sup>

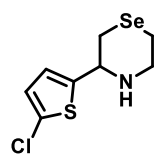

**3-(5-Chlorothiophen-2-yl)selenomorpholine (3y).** Purification by flash column chromatography (PE/EA, 3:1) afforded **3y** (34 mg, 51% yield) as light yellow oil. <sup>1</sup>H NMR (400 MHz, CDCl<sub>3</sub>)  $\delta$  6.78 – 6.68 (m, 2H), 4.21 (dd,  $J$  = 10.6, 2.1 Hz, 1H), 3.59 (dt,  $J$  = 12.9, 3.2 Hz, 1H), 3.29 – 3.18 (m, 1H), 2.95 – 2.83 (m, 2H), 2.63 – 2.52 (m, 1H), 2.45 – 2.34 (m, 1H), 1.81 (s, 1H). <sup>13</sup>C NMR (101 MHz, CDCl<sub>3</sub>)  $\delta$  147.5, 128.8, 125.6, 122.5, 58.5, 49.6, 25.0, 18.2. ESI-HRMS calcd for C<sub>8</sub>H<sub>11</sub>ClNSe 44 267.9457, found 267.9448.

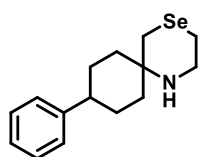

**9-Phenyl-4-selena-1-azaspiro[5.5]undecane (3z).** Purification by flash column chromatography (PE/EA, 4:1) afforded **3z** (13 mg, 18% yield) as light yellow solid. <sup>1</sup>H NMR (400 MHz, CDCl<sub>3</sub>)  $\delta$  7.32 – 7.27 (m, 2H), 7.24 (d,  $J$  = 7.0 Hz, 2H), 7.18 (t,  $J$  = 7.1 Hz, 1H), 3.22 – 3.16 (m, 2H), 2.53 (q,  $J$  = 7.5, 6.4 Hz, 5H), 2.33 – 2.24 (m, 2H), 1.76 – 1.63 (m, 4H), 1.49 (s, 1H), 1.34 (td,  $J$  = 13.6, 5.7 Hz, 2H). <sup>13</sup>C NMR (101 MHz, CDCl<sub>3</sub>)  $\delta$  147.0, 128.5, 127.0, 126.1, 48.4, 44.6, 41.6, 35.8, 31.5, 28.7, 19.0. ESI-HRMS calcd for C<sub>15</sub>H<sub>22</sub>NSe [M + H] 296.0912, found 296.0906.

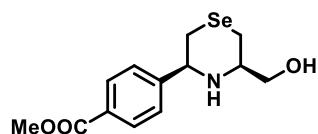

**Methyl 4-((3S,5R)-5-(hydroxymethyl)selenomorpholin-3-yl)benzoate (4a).** Purification by flash column chromatography (PE/EA, 3:1) afforded **4a** (47 mg, 60% yield, d.r. > 20:1) as colorless oil. <sup>1</sup>H NMR (400 MHz, CDCl<sub>3</sub>)  $\delta$  7.97 (d,  $J$  = 8.3 Hz, 2H), 7.41 (d,  $J$  = 8.3 Hz, 2H), 4.11 (dd,  $J$  = 11.0, 2.0 Hz, 1H), 3.89 (s, 3H), 3.65 (dd,  $J$  = 10.5, 3.9 Hz, 1H), 3.48 – 3.40 (m, 1H), 3.29 – 3.21 (m, 1H), 2.88 – 2.80 (m, 1H), 2.59 (t,  $J$  = 11.5 Hz, 1H), 2.45 (d,  $J$  = 12.1 Hz, 1H), 2.31 (d,  $J$  = 11.8 Hz, 1H). <sup>13</sup>C NMR (101 MHz, CDCl<sub>3</sub>)  $\delta$  167.0, 149.7, 130.1, 129.6, 126.6, 66.9, 63.4, 60.7, 52.2, 24.7, 18.8. ESI-HRMS calcd for C<sub>13</sub>H<sub>18</sub>NO<sub>3</sub>Se [M + H] 316.0446, found 316.0454.

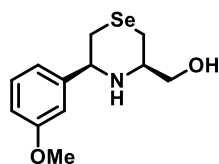

**((3R,5S)-5-(3-Methoxyphenyl)selenomorpholin-3-yl)methanol (4b).** Purification by flash column chromatography (PE/EA, 3:1) afforded **4b** (40 mg, 55% yield, d.r. > 20:1) as white solid. <sup>1</sup>H NMR (400 MHz, CDCl<sub>3</sub>)  $\delta$  7.26 – 7.22 (m, 1H), 6.95 – 6.90 (m, 2H), 6.81 (ddd,  $J$  = 8.3, 2.5, 0.9 Hz, 1H), 4.05 (dd,  $J$  = 11.0, 2.2 Hz, 1H), 3.80 (s, 3H), 3.65 (dd,  $J$  = 10.6, 3.9 Hz, 1H), 3.49 – 3.42 (m, 1H), 3.30 – 3.21 (m, 1H), 2.93 – 2.84 (m, 1H), 2.62 (t,  $J$  = 11.5 Hz, 1H), 2.49 (dt,  $J$  = 12.0, 1.6 Hz, 1H), 2.32 (d,  $J$  = 11.9 Hz, 1H), 2.10 (s, 2H). <sup>13</sup>C NMR (101 MHz, CDCl<sub>3</sub>)  $\delta$  160.0, 146.5, 129.8, 118.9, 113.2, 112.3, 67.1, 63.8, 60.9, 55.4, 24.9, 18.9. ESI-HRMS calcd for C<sub>12</sub>H<sub>18</sub>NO<sub>2</sub>Se [M + H] 288.0497, found 288.0504.



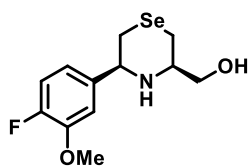

**((3R,5S)-5-(4-Fluoro-3-methoxyphenyl)selenomorpholin-3-yl)methanol (4c).** Purification by flash column chromatography (PE/EA, 3:1) afforded **4c** (47 mg, 62% yield, d.r. > 20:1) as white solid.  $^1\text{H}$  NMR (400 MHz,  $\text{CDCl}_3$ )  $\delta$  7.05 – 6.96 (m, 2H), 6.87 (ddd,  $J$  = 8.3, 4.4, 2.1 Hz, 1H), 4.03 (dd,  $J$  = 11.0, 2.2 Hz, 1H), 3.89 (s, 3H), 3.68 (dd,  $J$  = 10.5, 3.9 Hz, 1H), 3.47 (dd,  $J$  = 10.5, 7.9 Hz, 1H), 3.31 – 3.22 (m, 1H), 2.85 (dd,  $J$  = 12.0, 11.0 Hz, 1H), 2.61 (dd,  $J$  = 11.9, 11.0 Hz, 1H), 2.45 (ddd,  $J$  = 12.0, 2.3, 1.3 Hz, 1H), 2.32 (dt,  $J$  = 11.9, 1.7 Hz, 1H), 1.92 (s, 2H).  $^{13}\text{C}$  NMR (101 MHz,  $\text{CDCl}_3$ )  $\delta$  151.9 (d,  $J$  = 245.7 Hz), 147.8 (d,  $J$  = 10.7 Hz), 141.4 (d,  $J$  = 3.8 Hz), 118.9 (d,  $J$  = 6.9 Hz), 116.1 (d,  $J$  = 18.3 Hz), 111.8 (d,  $J$  = 2.1 Hz), 67.1, 63.5, 61.0, 56.5, 25.1 (d,  $J$  = 1.4 Hz), 18.8.  $^{19}\text{F}$  NMR (376 MHz,  $\text{CDCl}_3$ )  $\delta$  -136.4. ESI-HRMS calcd for  $\text{C}_{12}\text{H}_{17}\text{FNO}_2\text{Se}$  [ $\text{M} + \text{H}$ ] 306.0403, found 306.0412.

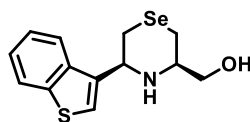

**((3R,5S)-5-(Benzo[b]thiophen-3-yl)selenomorpholin-3-yl)methanol (4d).** Purification by flash column chromatography (PE/EA, 3:1) afforded **4d** (27 mg, 35% yield, d.r. > 20:1) as colorless oil.  $^1\text{H}$  NMR (600 MHz,  $\text{CDCl}_3$ )  $\delta$  7.88 (dd,  $J$  = 15.9, 7.8 Hz, 2H), 7.42 – 7.33 (m, 3H), 4.56 – 4.52 (m, 1H), 3.69 (dd,  $J$  = 10.6, 3.9 Hz, 1H), 3.47 (dd,  $J$  = 10.5, 8.0 Hz, 1H), 3.36 (ddt,  $J$  = 11.8, 5.8, 3.0 Hz, 1H), 3.01 – 2.96 (m, 1H), 2.71 (d,  $J$  = 12.1 Hz, 1H), 2.66 (t,  $J$  = 11.5 Hz, 1H), 2.38 (d,  $J$  = 12.0 Hz, 1H), 2.06 (s, 2H).  $^{13}\text{C}$  NMR (151 MHz,  $\text{CDCl}_3$ )  $\delta$  140.8, 139.8, 137.4, 124.7, 124.3, 123.2, 122.0, 122.0, 67.1, 61.2, 57.9, 23.9, 19.2. ESI-HRMS calcd for  $\text{C}_{13}\text{H}_{16}\text{NOSSe}$  [ $\text{M} + \text{H}$ ] 314.0112, found 314.0117.

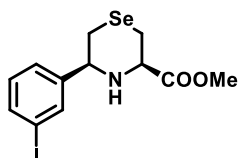

**Methyl ((3R,5S)-5-(3-iodophenyl)selenomorpholine-3-carboxylate (5a).** Purification by flash column chromatography (PE/EA, 30:1) afforded **5a** (45 mg, 44% yield, d.r. > 20:1) as colorless oil.  $^1\text{H}$  NMR (600 MHz,  $\text{CDCl}_3$ )  $\delta$  7.75 (t,  $J$  = 1.5 Hz, 1H), 7.62 (dt,  $J$  = 7.8, 1.3 Hz, 1H), 7.33 (d,  $J$  = 7.7 Hz, 1H), 7.07 (t,  $J$  = 7.8 Hz, 1H), 4.01 (d,  $J$  = 10.9 Hz, 1H), 3.87 (dd,  $J$  = 10.3, 2.3 Hz, 1H), 3.75 (s, 3H), 2.89 – 2.81 (m, 3H), 2.47 – 2.40 (m, 2H).  $^{13}\text{C}$  NMR (151 MHz,  $\text{CDCl}_3$ )  $\delta$  171.6, 146.6, 137.2, 135.7, 130.6, 126.0, 94.8, 63.8, 61.7, 52.6, 24.6, 18.8. ESI-HRMS calcd for  $\text{C}_{12}\text{H}_{15}\text{INO}_2\text{Se}$  [ $\text{M} + \text{H}$ ] 411.9307, found 411.9315.

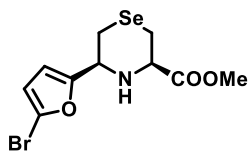

**Methyl ((3R,5S)-5-(5-bromofuran-2-yl)selenomorpholine-3-carboxylate (5b).** Purification by flash column chromatography (PE/EA, 30:1) afforded **5b** (36 mg, 41% yield, d.r. > 20:1) as colorless oil.  $^1\text{H}$  NMR (400 MHz,  $\text{CDCl}_3$ )  $\delta$  6.24 (d,  $J$  = 3.3 Hz, 1H), 6.21 (d,  $J$  = 3.3 Hz, 1H), 4.17 (d,  $J$  = 11.0 Hz, 1H), 3.92 – 3.85 (m, 1H), 3.76 (s, 3H), 2.93 – 2.86 (m, 1H), 2.86 – 2.75 (m, 2H), 2.59 (dd,  $J$  = 12.1, 1.9 Hz, 1H), 2.44 (s, 1H).  $^{13}\text{C}$  NMR (101 MHz,  $\text{CDCl}_3$ )  $\delta$  171.5, 158.0, 121.2, 112.0, 108.1, 61.1, 56.8, 52.6, 21.2, 19.0. ESI-HRMS calcd for  $\text{C}_{10}\text{H}_{13}\text{BrNO}_3\text{Se}$  [ $\text{M} + \text{H}$ ] 353.9239, found 353.9243.



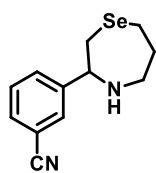

**3-(1,4-Selenazepan-3-yl)benzonitrile (6a).** Purification by flash column chromatography (PE/EA, 2:1) afforded **6a** (30 mg, 45% yield) as colorless oil.  $^1\text{H}$  NMR (400 MHz,  $\text{CDCl}_3$ )  $\delta$  7.71 (t,  $J = 1.7$  Hz, 1H), 7.61 (dt,  $J = 7.8, 1.5$  Hz, 1H), 7.53 (dt,  $J = 7.7, 1.4$  Hz, 1H), 7.41 (t,  $J = 7.7$  Hz, 1H), 4.08 (dd,  $J = 8.6, 4.1$  Hz, 1H), 3.15 (dt,  $J = 14.4, 4.6$  Hz, 1H), 3.08 – 2.96 (m, 2H), 2.95 – 2.78 (m, 3H), 2.20 – 2.09 (m, 1H), 2.07 – 1.97 (m, 1H), 1.78 (s, 1H).  $^{13}\text{C}$  NMR (101 MHz,  $\text{CDCl}_3$ )  $\delta$  146.7, 131.3, 131.0, 130.4, 129.4, 118.9, 112.7, 65.1, 47.3, 33.8, 33.8, 24.4. ESI-HRMS calcd for  $\text{C}_{12}\text{H}_{15}\text{N}_2\text{Se}$  [ $\text{M} + \text{H}$ ] 267.0395, found 267.0392.

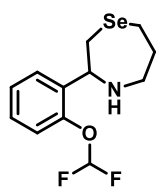

**3-(2-(Difluoromethoxy)phenyl)-1,4-selenazepane (6b).** Purification by flash column chromatography (PE/EA, 2:1) afforded **6b** (18 mg, 23% yield) as colorless oil.  $^1\text{H}$  NMR (400 MHz,  $\text{CDCl}_3$ )  $\delta$  7.52 (dd,  $J = 7.5, 1.9$  Hz, 1H), 7.28 – 7.17 (m, 2H), 7.08 (dq,  $J = 7.9, 1.2$  Hz, 1H), 6.56 (t,  $J = 73.9$  Hz, 1H), 4.40 (dd,  $J = 8.8, 3.9$  Hz, 1H), 3.24 (dt,  $J = 14.4, 4.4$  Hz, 1H), 3.10 – 2.81 (m, 5H), 2.20 – 2.09 (m, 1H), 2.08 – 1.98 (m, 1H), 1.74 (s, 1H).  $^{13}\text{C}$  NMR (101 MHz,  $\text{CDCl}_3$ )  $\delta$  147.9, 136.8, 128.4, 127.7, 125.9, 118.9, 116.4 (t,  $J = 259.6$  Hz), 59.4, 48.1, 33.7, 32.9, 24.0.  $^{19}\text{F}$  NMR (376 MHz,  $\text{CDCl}_3$ )  $\delta$  -80.0 (d,  $J = 27.6$  Hz). ESI-HRMS calcd for  $\text{C}_{12}\text{H}_{16}\text{F}_2\text{NOSe}$  [ $\text{M} + \text{H}$ ] 308.0360, found 308.0360.

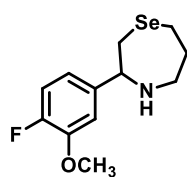

**3-(4-Fluoro-3-methoxyphenyl)-1,4-selenazepane (6c).** Purification by flash column chromatography (PE/EA, 1:1) afforded **6c** (24 mg, 33% yield) as colorless oil.  $^1\text{H}$  NMR (400 MHz,  $\text{CDCl}_3$ )  $\delta$  7.04 – 6.96 (m, 2H), 6.86 (ddd,  $J = 8.3, 4.4, 2.1$  Hz, 1H), 3.98 (dd,  $J = 8.7, 4.1$  Hz, 1H), 3.89 (s, 3H), 3.21 (ddd,  $J = 14.3, 4.9, 3.9$  Hz, 1H), 3.09 – 2.80 (m, 5H), 2.20 – 2.08 (m, 1H), 2.03 – 1.93 (m, 1H), 1.75 (s, 1H).  $^{13}\text{C}$  NMR (101 MHz,  $\text{CDCl}_3$ )  $\delta$  151.7 (d,  $J = 245.1$  Hz), 147.7 (d,  $J = 10.6$  Hz), 141.9 (d,  $J = 3.8$  Hz), 118.7 (d,  $J = 6.7$  Hz), 116.0 (d,  $J = 18.1$  Hz), 111.8 (d,  $J = 1.9$  Hz), 66.7, 56.4, 48.0, 34.3, 33.4, 24.2.  $^{19}\text{F}$  NMR (376 MHz,  $\text{CDCl}_3$ )  $\delta$  -137.2. ESI-HRMS calcd for  $\text{C}_{12}\text{H}_{16}\text{FNNaOSe}$  [ $\text{M} + \text{Na}$ ] 312.0274, found 312.0272.

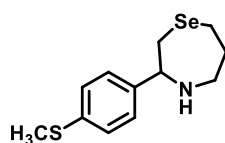

**3-(4-(Methylthio)phenyl)-1,4-selenazepane (6d).** Purification by flash column chromatography (PE/EA, 1:1) afforded **6d** (30 mg, 41% yield) as light yellow solid.  $^1\text{H}$  NMR (400 MHz,  $\text{CDCl}_3$ )  $\delta$  7.31 – 7.26 (m, 2H), 7.24 – 7.18 (m, 2H), 3.98 (dd,  $J = 8.6, 4.3$  Hz, 1H), 3.23 – 3.16 (m, 1H), 3.10 – 2.81 (m, 5H), 2.46 (s, 3H), 2.18 – 2.08 (m, 1H), 2.02 – 1.91 (m, 1H), 1.80 (s, 1H).  $^{13}\text{C}$  NMR (101 MHz,  $\text{CDCl}_3$ )  $\delta$  142.4, 137.4, 127.1, 127.0, 66.7, 47.9, 34.2, 33.4, 24.2, 16.1. ESI-HRMS calcd for  $\text{C}_{12}\text{H}_{17}\text{NNaSSe}$  [ $\text{M} + \text{Na}$ ] 310.0139, found 310.0133.



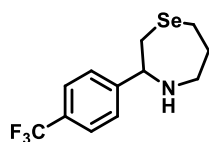

**3-(4-(Trifluoromethyl)phenyl)-1,4-selenazepane (6e).** Purification by flash column chromatography (PE/EA, 4:1) afforded **6e** (32 mg, 41% yield) as colorless oil.  $^1\text{H}$  NMR (400 MHz,  $\text{CDCl}_3$ )  $\delta$  7.57 (d,  $J$  = 8.2 Hz, 2H), 7.49 (d,  $J$  = 8.3 Hz, 2H), 4.10 (dd,  $J$  = 8.8, 4.0 Hz, 1H), 3.19 (dt,  $J$  = 14.4, 4.5 Hz, 1H), 3.06 (ddd,  $J$  = 14.3, 9.9, 3.9 Hz, 1H), 3.01 – 2.91 (m, 2H), 2.91 – 2.81 (m, 2H), 2.16 (ddq,  $J$  = 15.0, 10.0, 5.0 Hz, 1H), 2.01 (dtd,  $J$  = 13.9, 9.5, 4.2 Hz, 1H), 1.71 (s, 1H).  $^{13}\text{C}$  NMR (101 MHz,  $\text{CDCl}_3$ )  $\delta$  149.2 (d,  $J$  = 1.0 Hz), 129.6 (q,  $J$  = 32.5 Hz), 127.0, 125.7 (q,  $J$  = 3.7 Hz), 124.3 (q,  $J$  = 272.0 Hz), 66.1, 47.7, 34.0, 33.7, 24.3.  $^{19}\text{F}$  NMR (376 MHz,  $\text{CDCl}_3$ )  $\delta$  -62.5. ESI-HRMS calcd for  $\text{C}_{12}\text{H}_{15}\text{F}_3\text{NSe}$  [ $\text{M} + \text{H}$ ] 310.0316, found 310.0314.

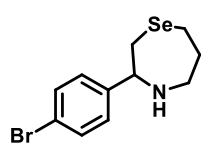

**3-(4-Bromophenyl)-1,4-selenazepane (6f).** Purification by flash column chromatography (PE/EA, 3:1) afforded **6f** (28 mg, 35% yield) as light yellow oil.  $^1\text{H}$  NMR (400 MHz,  $\text{CDCl}_3$ )  $\delta$  7.46 – 7.41 (m, 2H), 7.26 – 7.22 (m, 2H), 3.99 (dd,  $J$  = 8.9, 4.0 Hz, 1H), 3.19 (dt,  $J$  = 14.4, 4.5 Hz, 1H), 3.08 – 3.00 (m, 1H), 2.98 – 2.80 (m, 4H), 2.18 – 2.08 (m, 1H), 2.03 – 1.92 (m, 1H), 1.78 (s, 1H).  $^{13}\text{C}$  NMR (101 MHz,  $\text{CDCl}_3$ )  $\delta$  144.4, 131.8, 128.4, 121.1, 66.2, 47.8, 34.1, 33.5, 24.3. ESI-HRMS calcd for  $\text{C}_{11}\text{H}_{15}\text{BrNSe}$  [ $\text{M} + \text{H}$ ] 319.9544, found 319.9555.

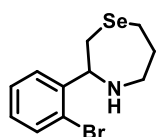

**3-(2-Bromophenyl)-1,4-selenazepane (6g).** Purification by flash column chromatography (PE/EA, 3:1) afforded **6g** (16 mg, 20% yield) as colorless oil.  $^1\text{H}$  NMR (400 MHz,  $\text{CDCl}_3$ )  $\delta$  7.53 (dt,  $J$  = 7.8, 1.1 Hz, 2H), 7.30 (td,  $J$  = 7.6, 1.3 Hz, 1H), 7.13 – 7.07 (m, 1H), 4.44 (dd,  $J$  = 8.7, 3.7 Hz, 1H), 3.27 (ddd,  $J$  = 14.4, 4.9, 3.8 Hz, 1H), 3.14 – 2.93 (m, 3H), 2.89 – 2.77 (m, 2H), 2.20 – 2.09 (m, 1H), 2.08 – 1.98 (m, 1H), 1.65 (s, 1H).  $^{13}\text{C}$  NMR (101 MHz,  $\text{CDCl}_3$ )  $\delta$  144.2, 133.0, 128.7, 127.9, 127.8, 123.0, 65.0, 48.3, 33.6, 32.6, 24.0. ESI-HRMS calcd for  $\text{C}_{11}\text{H}_{15}\text{BrNSe}$  [ $\text{M} + \text{H}$ ] 319.9544, found 319.9555.

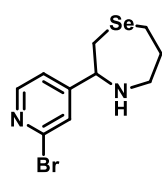

**3-(2-Bromopyridin-4-yl)-1,4-selenazepane (6h).** Purification by flash column chromatography (PE/EA, 2:1) afforded **6h** (25 mg, 31% yield) as light yellow oil.  $^1\text{H}$  NMR (400 MHz,  $\text{CDCl}_3$ )  $\delta$  8.29 (d,  $J$  = 5.1 Hz, 1H), 7.53 (d,  $J$  = 1.4 Hz, 1H), 7.27 – 7.25 (m, 1H), 4.03 (dd,  $J$  = 8.7, 4.3 Hz, 1H), 3.12 – 2.97 (m, 3H), 2.89 – 2.78 (m, 3H), 2.24 – 2.12 (m, 1H), 2.09 – 1.96 (m, 1H), 1.65 (s, 1H).  $^{13}\text{C}$  NMR (101 MHz,  $\text{CDCl}_3$ )  $\delta$  156.9, 150.4, 142.8, 126.2, 121.1, 63.9, 46.9, 34.1, 33.2, 24.5. ESI-HRMS calcd for  $\text{C}_{10}\text{H}_{14}\text{BrN}_2\text{Se}$  [ $\text{M} + \text{H}$ ] 320.9497, found 320.9482.

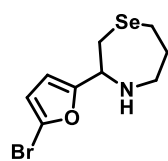

**3-(5-Bromofuran-2-yl)-1,4-selenazepane (6i).** Purification by flash column chromatography (PE/EA, 3:1) afforded **6i** (19 mg, 25% yield) as light yellow oil.  $^1\text{H}$  NMR (400 MHz,  $\text{CDCl}_3$ )  $\delta$  6.22 (d,  $J$  = 3.3 Hz, 1H), 6.18 (dd,  $J$  = 3.2, 0.9 Hz, 1H), 4.12 (dd,  $J$  = 8.8, 4.7 Hz, 1H), 3.10 (dd,  $J$  = 13.6, 4.7 Hz, 1H), 3.06 – 2.91 (m, 3H), 2.79 (dd,  $J$  = 7.3, 5.2 Hz, 2H), 2.19 – 2.09 (m, 1H), 2.04 – 1.94 (m, 1H), 1.66 (s, 1H).  $^{13}\text{C}$  NMR (101 MHz,  $\text{CDCl}_3$ )



$\delta$  159.1, 120.7, 111.9, 108.2, 58.1, 45.6, 34.0, 30.7, 24.6. ESI-HRMS calcd for  $C_9H_{12}BrNNaOSe$  [ $M + Na$ ] 331.9156, found 331.9170.

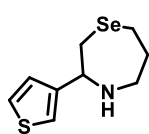

**3-(Thiophen-3-yl)-1,4-selenazepane (6j).** Purification by flash column chromatography (PE/EA, 3:1) afforded **6j** (18 mg, 29% yield) as light yellow oil.  $^1H$  NMR (400 MHz,  $CDCl_3$ )  $\delta$  7.28 (dd,  $J = 5.0, 3.0$  Hz, 1H), 7.18 (dt,  $J = 2.9, 1.0$  Hz, 1H), 7.09 (dd,  $J = 5.0, 1.3$  Hz, 1H), 4.16 (dd,  $J = 8.8, 4.1$  Hz, 1H), 3.14 (dt,  $J = 14.4, 4.7$  Hz, 1H), 3.07 – 2.98 (m, 2H), 2.97 – 2.79 (m, 3H), 2.19 – 2.08 (m, 1H), 2.03 – 1.91 (m, 2H).  $^{13}C$  NMR (101 MHz,  $CDCl_3$ )  $\delta$  146.1, 126.5, 126.0, 120.4, 61.9, 47.1, 33.9, 33.6, 24.4. ESI-LRMS: [ $M+H$ ] $^+$  248.15.

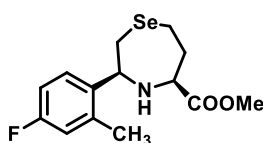

**Methyl (3S,5S)-3-(4-fluoro-2-methylphenyl)-1,4-selenazepane-5-carboxylate (7a).** Purification by flash column chromatography (PE/EA, 30:1) afforded **7a** (50 mg, 61% yield, d.r. > 20:1) as colorless oil.  $^1H$  NMR (400 MHz,  $CDCl_3$ )  $\delta$  7.43 (dd,  $J = 8.6, 6.0$  Hz, 1H), 6.91 – 6.80 (m, 2H), 4.16 (dd,  $J = 11.3, 4.9$  Hz, 1H), 4.09 (dd,  $J = 10.2, 2.9$  Hz, 1H), 3.72 (s, 3H), 3.07 (ddd,  $J = 13.2, 11.6, 5.9$  Hz, 1H), 2.94 (ddd,  $J = 13.2, 6.3, 2.4$  Hz, 1H), 2.82 (dd,  $J = 12.9, 10.2$  Hz, 1H), 2.68 (dd,  $J = 13.0, 2.8$  Hz, 1H), 2.43 (s, 1H), 2.37 – 2.26 (m, 4H), 2.11 – 2.00 (m, 1H).  $^{13}C$  NMR (101 MHz,  $CDCl_3$ )  $\delta$  175.7, 161.7 (d,  $J = 245.4$  Hz), 138.8 (d,  $J = 3.3$  Hz), 136.8 (d,  $J = 7.6$  Hz), 127.5 (d,  $J = 8.4$  Hz), 117.1 (d,  $J = 21.0$  Hz), 113.2 (d,  $J = 20.8$  Hz), 63.6, 61.7, 52.5, 35.4, 34.0, 23.3, 19.5 (d,  $J = 1.5$  Hz).  $^{19}F$  NMR (376 MHz,  $CDCl_3$ )  $\delta$  -115.9. ESI-HRMS calcd for  $C_{14}H_{19}FNO_2Se$  [ $M + H$ ] 332.0560, found 332.0566.

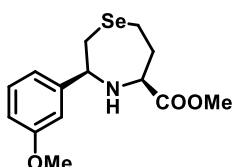

**Methyl (3S,5S)-3-(3-methoxyphenyl)-1,4-selenazepane-5-carboxylate (7b).** Purification by flash column chromatography (PE/EA, 30:1) afforded **7b** (52 mg, 63% yield, d.r. > 20:1) as colorless oil.  $^1H$  NMR (400 MHz,  $CDCl_3$ )  $\delta$  7.23 (t,  $J = 7.9$  Hz, 1H), 6.96 – 6.89 (m, 2H), 6.81 (ddd,  $J = 8.2, 2.6, 1.0$  Hz, 1H), 4.16 (dd,  $J = 11.3, 4.9$  Hz, 1H), 3.92 (dd,  $J = 10.3, 3.0$  Hz, 1H), 3.81 (s, 3H), 3.72 (s, 3H), 3.08 (ddd,  $J = 13.3, 11.6, 5.9$  Hz, 1H), 2.94 (ddd,  $J = 13.3, 6.3, 2.3$  Hz, 1H), 2.87 (dd,  $J = 12.9, 10.4$  Hz, 1H), 2.75 (dd,  $J = 12.9, 2.8$  Hz, 1H), 2.59 (s, 1H), 2.38 – 2.26 (m, 1H), 2.13 – 2.02 (m, 1H).  $^{13}C$  NMR (101 MHz,  $CDCl_3$ )  $\delta$  175.7, 160.0, 146.4, 129.8, 118.9, 113.2, 112.1, 68.7, 61.5, 55.4, 52.5, 35.5, 35.4, 23.1. ESI-HRMS calcd for  $C_{14}H_{19}NO_3SeNa$  [ $M + Na$ ] 352.0422, found 352.0423.

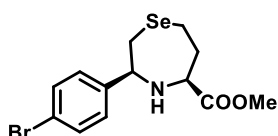

**Methyl (3S,5S)-3-(4-bromophenyl)-1,4-selenazepane-5-carboxylate (7c).** Purification by flash column chromatography **7c** (PE/EA, 30:1) afforded (38 mg, 40% yield, d.r. > 20:1) as colorless oil.  $^1H$  NMR (400 MHz,  $CDCl_3$ )  $\delta$  7.48 – 7.42 (m, 2H), 7.26 – 7.21 (m, 2H), 4.14 (dd,  $J = 11.3, 4.8$  Hz, 1H), 3.91 (dd,  $J = 10.1, 3.0$  Hz, 1H), 3.72 (s, 3H), 3.05 (ddd,  $J = 13.3, 11.5, 5.8$  Hz, 1H), 2.93 (ddd,  $J = 13.2, 6.3, 2.6$  Hz, 1H), 2.81 (dd,  $J = 12.9, 10.1$  Hz, 1H), 2.71 (dd,  $J = 13.0, 3.0$  Hz, 1H), 2.54 (s, 1H), 2.33 (dddd,  $J = 13.6, 11.3, 6.4, 4.8$  Hz, 1H), 2.05 (dddd,  $J = 13.8, 11.4, 5.9, 2.8$



Hz, 1H).  $^{13}\text{C}$  NMR (101 MHz,  $\text{CDCl}_3$ )  $\delta$  175.7, 143.8, 131.9, 128.3, 121.5, 67.7, 61.3, 52.5, 35.5, 35.2, 23.2. ESI-HRMS calcd for  $\text{C}_{13}\text{H}_{17}\text{BrNO}_2\text{Se}$  [ $\text{M} + \text{H}$ ] 377.9602, found 377.9610.

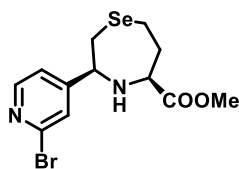

**Methyl (3*S*,5*S*)-3-(2-bromopyridin-4-yl)-1,4-selenazepane-5-carboxylate (7d).** Purification by flash column chromatography (PE/EA, 10:1) afforded **7d** (43 mg, 46% yield, d.r. > 20:1) as colorless oil.  $^1\text{H}$  NMR (400 MHz,  $\text{CDCl}_3$ )  $\delta$  8.32 (dd,  $J = 5.1$ , 0.7 Hz, 1H), 7.51 (dd,  $J = 1.4$ , 0.7 Hz, 1H), 7.25 (dd,  $J = 5.1$ , 1.4 Hz, 1H), 4.08 (dd,  $J = 11.2$ , 4.6 Hz, 1H), 3.93 (t,  $J = 6.5$  Hz, 1H), 3.75 (s, 3H), 3.03 (ddd,  $J = 13.4$ , 10.9, 5.7 Hz, 1H), 2.97 – 2.90 (m, 1H), 2.76 (d,  $J = 6.8$  Hz, 2H), 2.58 (s, 1H), 2.43 – 2.33 (m, 1H), 2.11 – 2.01 (m, 1H).  $^{13}\text{C}$  NMR (101 MHz,  $\text{CDCl}_3$ )  $\delta$  175.4, 156.0, 150.7, 142.9, 126.1, 120.9, 66.0, 60.9, 52.7, 35.6, 34.6, 23.4. ESI-HRMS calcd for  $\text{C}_{12}\text{H}_{16}\text{BrN}_2\text{O}_2\text{Se}$  [ $\text{M} + \text{H}$ ] 378.9555, found 378.9562.

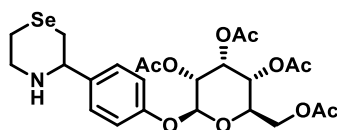

**(2*R*,3*R*,4*R*,5*R*,6*S*)-2-(acetoxymethyl)-6-(4-(selenomorpholin-3-yl)phenoxy)tetrahydro-2*H*-pyran-3,4,5-triyl triacetate (8a).** Purification by flash column chromatography (PE/EA, 4:1) afforded **8a** (53 mg, 37% yield) as light yellow oil.  $^1\text{H}$  NMR (400 MHz,  $\text{CDCl}_3$ )  $\delta$  7.32 – 7.27 (m, 2H), 7.01 – 6.96 (m, 2H), 5.73 (t,  $J = 3.0$  Hz, 1H), 5.34 (dd,  $J = 8.2$ , 1.3 Hz, 1H), 5.14 (dd,  $J = 8.2$ , 3.1 Hz, 1H), 5.09 – 5.01 (m, 1H), 4.24 (q,  $J = 2.7$ , 2.1 Hz, 3H), 3.97 (dd,  $J = 10.9$ , 2.1 Hz, 1H), 3.61 (dt,  $J = 12.6$ , 3.2 Hz, 1H), 3.26 (td,  $J = 12.3$ , 2.3 Hz, 1H), 3.03 – 2.90 (m, 2H), 2.45 – 2.38 (m, 2H), 2.15 (s, 3H), 2.08 (s, 3H), 2.04 (s, 3H), 2.02 (s, 3H), 1.69 (s, 1H).  $^{13}\text{C}$  NMR (101 MHz,  $\text{CDCl}_3$ )  $\delta$  170.8, 169.9, 169.2, 156.6, 156.6, 140.2, 140.2, 127.7, 117.2, 97.4, 97.4, 70.6, 68.9, 68.6, 66.3, 63.0, 62.5, 50.3, 25.0, 20.9, 20.8, 20.7, 20.7, 18.2. ESI-HRMS calcd for  $\text{C}_{24}\text{H}_{32}\text{NO}_{10}\text{Se}$  [ $\text{M} + \text{H}$ ] 574.1188, found 574.1205.

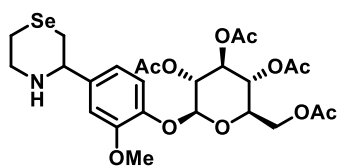

**(2*R*,3*R*,4*S*,5*R*,6*S*)-2-(acetoxymethyl)-6-(2-methoxy-4-(selenomorpholin-3-yl)phenoxy)tetrahydro-2*H*-pyran-3,4,5-triyl triacetate (8b).** Purification by flash column chromatography (PE/EA, 4:1) afforded **8b** (45 mg, 30% yield) as light yellow oil.  $^1\text{H}$  NMR (400 MHz,  $\text{CDCl}_3$ )  $\delta$  7.04 (dd,  $J = 8.2$ , 1.5 Hz, 1H), 6.91 (dd,  $J = 7.8$ , 2.0 Hz, 1H), 6.83 (td,  $J = 8.1$ , 2.0 Hz, 1H), 5.30 – 5.23 (m, 2H), 5.18 – 5.11 (m, 1H), 4.95 – 4.90 (m, 1H), 4.26 (dd,  $J = 12.2$ , 5.1 Hz, 1H), 4.15 (dd,  $J = 12.2$ , 2.5 Hz, 1H), 3.94 (dd,  $J = 10.9$ , 2.1 Hz, 1H), 3.81 (s, 3H), 3.78 – 3.72 (m, 1H), 3.60 (dt,  $J = 12.6$ , 3.3 Hz, 1H), 3.25 (td,  $J = 12.3$ , 2.1 Hz, 1H), 3.02 – 2.88 (m, 2H), 2.41 (d,  $J = 12.2$  Hz, 2H), 2.07 (s, 3H), 2.06 (s, 3H), 2.02 (s, 3H), 2.02 (s, 3H), 1.78 (s, 1H).  $^{13}\text{C}$  NMR (101 MHz,  $\text{CDCl}_3$ )  $\delta$  170.7, 170.4, 169.5, 169.5, 150.9, 150.8, 145.5, 145.5, 142.0, 142.0, 120.2, 120.1, 118.8, 118.7, 110.9, 110.8, 100.9, 100.9, 72.7, 72.1, 71.3, 68.6, 63.4, 62.1, 56.2, 50.2, 25.0, 20.9, 20.8, 20.8, 20.7, 18.2. ESI-HRMS calcd for  $\text{C}_{25}\text{H}_{34}\text{NO}_{11}\text{Se}$  [ $\text{M} + \text{H}$ ] 604.1294, found 604.1289.



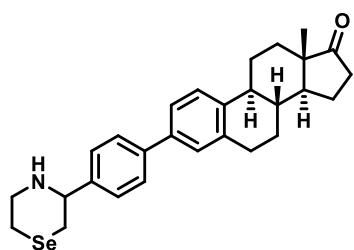

**(8R,9S,13S,14S)-13-methyl-3-(4-(selenomorpholin-3-yl)phenyl)-6,7,8,9,11,12,13,14,15,16-decahydro-17H-cyclopenta[a]phenanthren-17-one (8c).** Purification by flash column chromatography (PE/EA, 3:1) afforded **8c** (49 mg, 41% yield) as light yellow oil.  $^1\text{H}$  NMR (400 MHz,  $\text{CDCl}_3$ )  $\delta$  7.54 (d,  $J = 8.3$  Hz, 2H), 7.40 (d,  $J = 8.2$  Hz, 2H), 7.37 (s, 2H), 7.32 (s, 1H), 4.05 (dd,  $J = 11.0, 2.2$  Hz, 1H), 3.64 (dt,  $J = 12.6, 3.2$  Hz, 1H), 3.29 (td,  $J = 12.3, 2.2$  Hz, 1H), 3.06 – 2.96 (m, 4H), 2.56 – 2.41 (m, 4H), 2.36 (td,  $J = 10.8, 4.1$  Hz, 1H), 2.21 – 1.96 (m, 4H), 1.71 (s, 1H), 1.68 – 1.46 (m, 6H), 0.93 (s, 3H).  $^{13}\text{C}$  NMR (101 MHz,  $\text{CDCl}_3$ )  $\delta$  220.9, 144.0, 140.5, 139.1, 138.5, 137.0, 127.8, 127.3, 126.9, 126.0, 124.6, 63.4, 50.7, 50.2, 48.1, 44.5, 38.3, 36.0, 31.8, 29.7, 26.7, 25.9, 24.9, 21.8, 18.3, 14.0. ESI-HRMS calcd for  $\text{C}_{28}\text{H}_{34}\text{NOSe}$  [ $\text{M} + \text{H}$ ] 480.1802, found 480.1808.

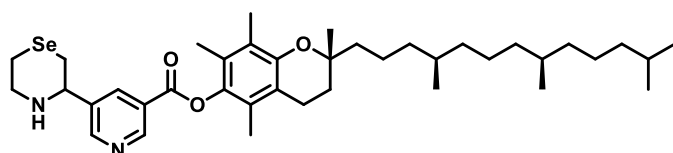

**(R)-2,5,7,8-tetramethyl-2-((4R,8R)-4,8,12-trimethyltridecyl)chroman-6-yl 5-(selenomorpholin-3-yl)nicotinate (8d).**

Purification by flash column chromatography (PE/EA, 10:1) afforded **8d** (86 mg, 50% yield) as light yellow oil.  $^1\text{H}$  NMR (400 MHz,  $\text{CDCl}_3$ )  $\delta$  9.34 (d,  $J = 2.0$  Hz, 1H), 8.86 (d,  $J = 2.2$  Hz, 1H), 8.47 (t,  $J = 2.1$  Hz, 1H), 4.19 (dd,  $J = 10.9, 2.2$  Hz, 1H), 3.65 (dt,  $J = 12.7, 3.2$  Hz, 1H), 3.29 (td,  $J = 12.3, 2.2$  Hz, 1H), 3.06 – 2.95 (m, 2H), 2.62 (t,  $J = 6.8$  Hz, 2H), 2.54 – 2.42 (m, 2H), 2.12 (s, 3H), 2.04 (s, 3H), 2.00 (s, 3H), 1.82 (dt,  $J = 14.8, 7.3$  Hz, 3H), 1.56 – 1.11 (m, 24H), 0.86 (t,  $J = 6.5$  Hz, 12H).  $^{13}\text{C}$  NMR (101 MHz,  $\text{CDCl}_3$ )  $\delta$  163.9, 152.7, 150.6, 149.8, 140.6, 140.4, 135.6, 126.8, 125.8, 125.0, 123.4, 117.7, 75.3, 60.6, 49.8, 39.5, 37.8 – 37.1 (m), 33.1 – 32.4 (m), 28.1, 24.9, 24.9, 24.6, 24.3, 22.8, 22.8, 21.2, 20.7, 20.1 – 19.3 (m), 18.2, 13.2, 12.4, 12.0. ESI-HRMS calcd for  $\text{C}_{39}\text{H}_{61}\text{N}_2\text{O}_3\text{Se}$  [ $\text{M} + \text{H}$ ] 685.3845, found 685.3844.

## 6. Scale-up Reaction of 7a

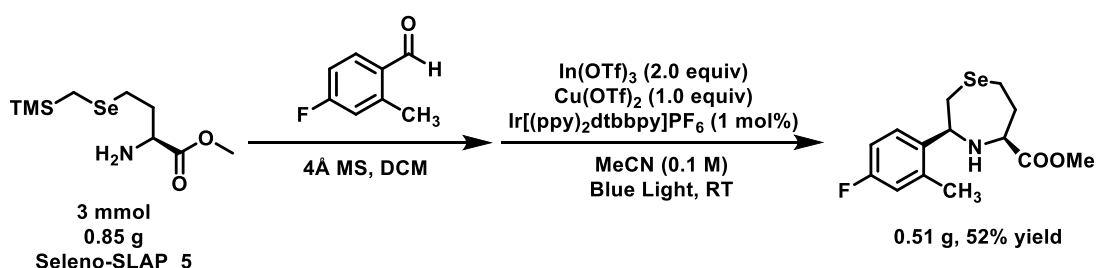

The reaction was conducted as following procedures. To a 25 mL oven-dried flask were added the Seleno-SLAP reagent **5** (0.85 g, 3 mmol, 1.0 equiv), 4-fluoro-2-methylbenzaldehyde (0.41 g, 3 mmol, 1.0 equiv) and MS 4Å. The flask was sealed with rubber stopper, exchanged the gas using  $\text{N}_2$  for 3 times and then dry DCM (10.0 mL)



was added. The reaction mixture was stirred at room temperature for 4 h and filtered through a short layer of Celite (DCM rinse). The filtrate was concentrated under reduced pressure to afford the imine and used directly for photo-cyclization. Then Cu(OTf)<sub>2</sub> (1.08 g, 3 mmol, 1.0 equiv), In(OTf)<sub>3</sub> (3.37 g, 6 mmol, 2.0 equiv), and Ir[(ppy)<sub>2</sub>dtbbpy]PF<sub>6</sub> (27.6 mg, 1 mol%) were added to a solution of the corresponding imine (3 mmol, 1.0 equiv) in dry MeCN (30 mL, 0.1 M). The reaction was stirred for 48 h at room temperature under the exposure of blue LEDs (30 W) with a cooling fan to maintain the temperature. NH<sub>4</sub>OH (25 mL) was added and the mixture was extracted with DCM (50 mL x 3). The combined organic layers were washed with brine (25 mL), dried over Na<sub>2</sub>SO<sub>4</sub>, filtered and concentrated. The residue was purified by flash column chromatography to afford **7a** (0.51 g, 52% yield).

## 7. Antifungal screening/Determination of MIC

### Determination of minimal inhibitory concentrations (MICs)

Yeast culture (*Candida albicans* ATCC 10231) was grown overnight on SDA plates and adjusted in Sabaroud's Dextrose broth (SDB) to a final inoculum of 10<sup>5</sup> – 10<sup>6</sup> CFU/mL. 100 µL of two-fold serial dilution of the compounds in SDB were added to an equal volume of broth containing the yeast culture in a 96-well plate. The final concentration of the compounds ranged from 3.125 – 400 µM. Positive and negative controls contained 200 µL of inoculum without any compounds and SDB broth alone respectively. The 96 well plates were then incubated at 37 °C for 24 h. All the experiments were performed in duplicates and the MIC was determined as the lowest concentration where no visible growth was observed.



**Table S3.** Antifungal properties of selected Selenomorpholines and 1,4-selenazapanes against *C. albicans* strains.

| Compound ID | MIC against <i>C. albicans</i><br>ATCC 10231 (μM) |
|-------------|---------------------------------------------------|
| 3b          | >400                                              |
| 3c          | 400                                               |
| 3d          | >400                                              |
| 3e          | >400                                              |
| 3f          | >400                                              |
| 3h          | >400                                              |
| 3j          | >400                                              |
| 3k          | >400                                              |
| 3m          | >400                                              |
| 3n          | >400                                              |
| 3o          | >400                                              |
| 3p          | >400                                              |
| 3q          | >400                                              |
| 3s          | >400                                              |
| 3t          | >400                                              |
| 3u          | 400                                               |
| 3v          | >400                                              |
| 3w          | >400                                              |
| 3y          | >400                                              |
| 3z          | >400                                              |
| 6a          | >400                                              |
| 6b          | 400                                               |
| 6c          | >400                                              |
| 6d          | >400                                              |
| 6e          | >400                                              |
| 6f          | >400                                              |
| 6g          | >400                                              |
| 6h          | >400                                              |
| 6i          | >400                                              |



## 8. Proposed mechanism

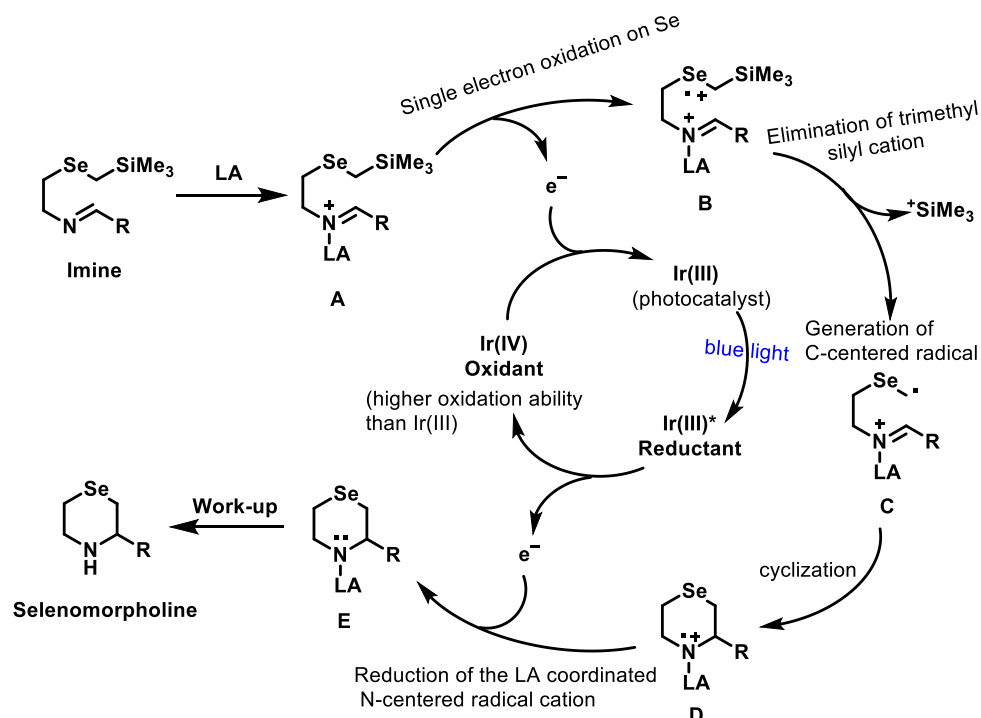

Possibly, the photocatalytic cyclization is undergoing the Ir(III)\*/Ir(IV) mechanistic pathway in the presence of Lewis acid (LA) as suggested by Bode et al. for the formation of thiomorpholines from the reaction between aldehydes and SLAP reagents pioneered by their group.<sup>10</sup> The possible mechanism is depicted above, which is mechanistically same as the one described by Bode for the synthesis of thiomorpholines.



## 9. References

1. R. J. Hondal, B. L. Nilsson and R. T. Raines, *J. Am. Chem. Soc.*, **2001**, 123, 5140-5141.
2. G. Zhou, X. Deng, J. Tian, M. H. U. T. Fazil, R. Lakshminarayanan and R. Srinivasan, *Chem. Commun.*, **2020**, 56, 1780-1783.
3. a) G. Wang, U. Mahesh, G. Y. J. Chen, and S. Q. Yao, *Org. Lett.*, **2003**, 5, 737-740.  
b) A. Boeijen, J. V. Ameijde, and R. M. J. Liskamp, *J. Org. Chem.*, **2001**, 66, 8454-8462.
4. S. J. Wu, S. Y. Tan, C. Y. Ang, K. T. Nguyen, M. H. Li and Y. L. Zhao, *Chem. Commun.*, **2015**, 51, 11622-11625.
5. J. J. Dong, L. Krasnova, M. G. Finn and K. B. Sharpless, *Angew. Chem. Int. Ed.*, **2014**, 53, 9430-9448.
6. H. Wen, C. L. Lin, L. Que, H. Ge, L. Ma, R. H. Cao, Y. Q. Wan, W. L. Peng, Z. H. Wang and H. C. Song, *Eur. J. Med. Chem.*, **2008**, 43, 166-173.
7. S. Pearson, W. Scarano and M. H. Stenzel, *Chem. Commun.*, **2012**, 48, 4695-4697.
8. S. Q. Yan, S. M. Ren, N. Ding and Y. X. Li, *Carbohydr. Res.*, **2018**, 460, 41-46.
9. Q. Q. Min, Z. S. Yin, Z. Feng, W. H. Guo and X. G. Zhang, *J. Am. Chem. Soc.*, **2014**, 136, 1230-1233.
10. S. Y. Hsieh and J. W. Bode, *ACS Cent. Sci.*, 2017, **3**, 66-72.



## 10. NMR Spectra

### Compound Seleno-SLAP 1

$^1\text{H}$  NMR (400 MHz,  $\text{CDCl}_3$ )

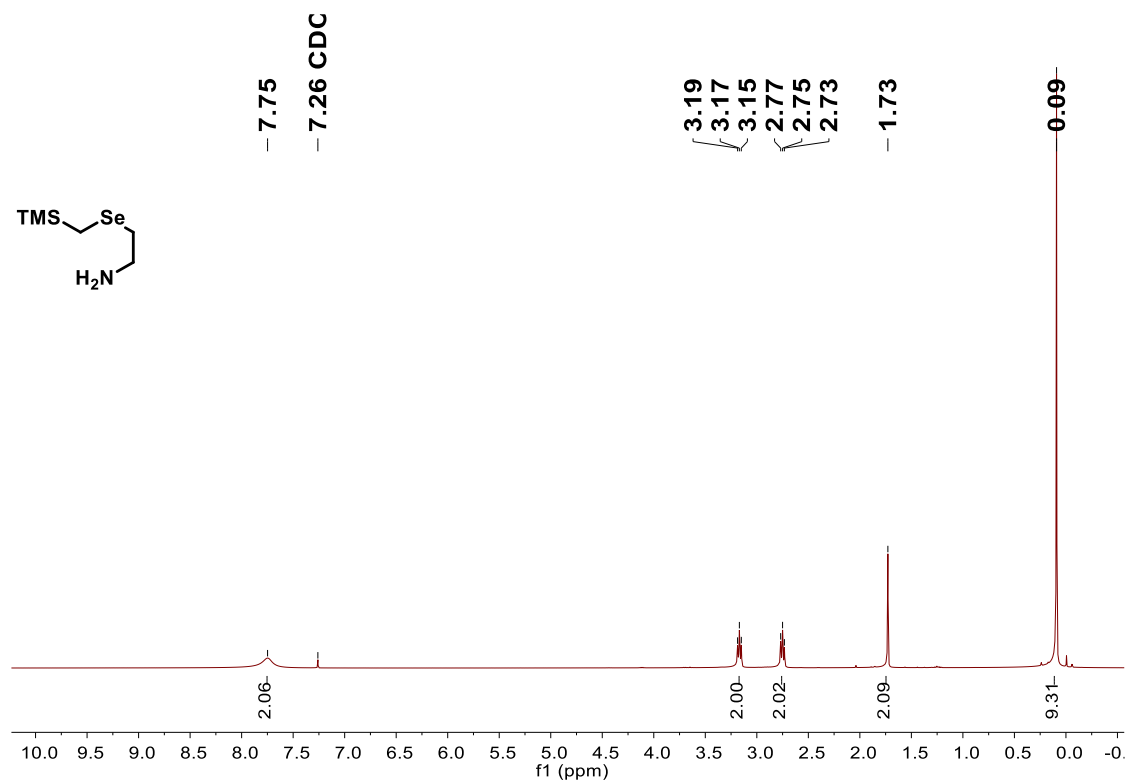

$^{13}\text{C}$  NMR (101 MHz,  $\text{CDCl}_3$ )

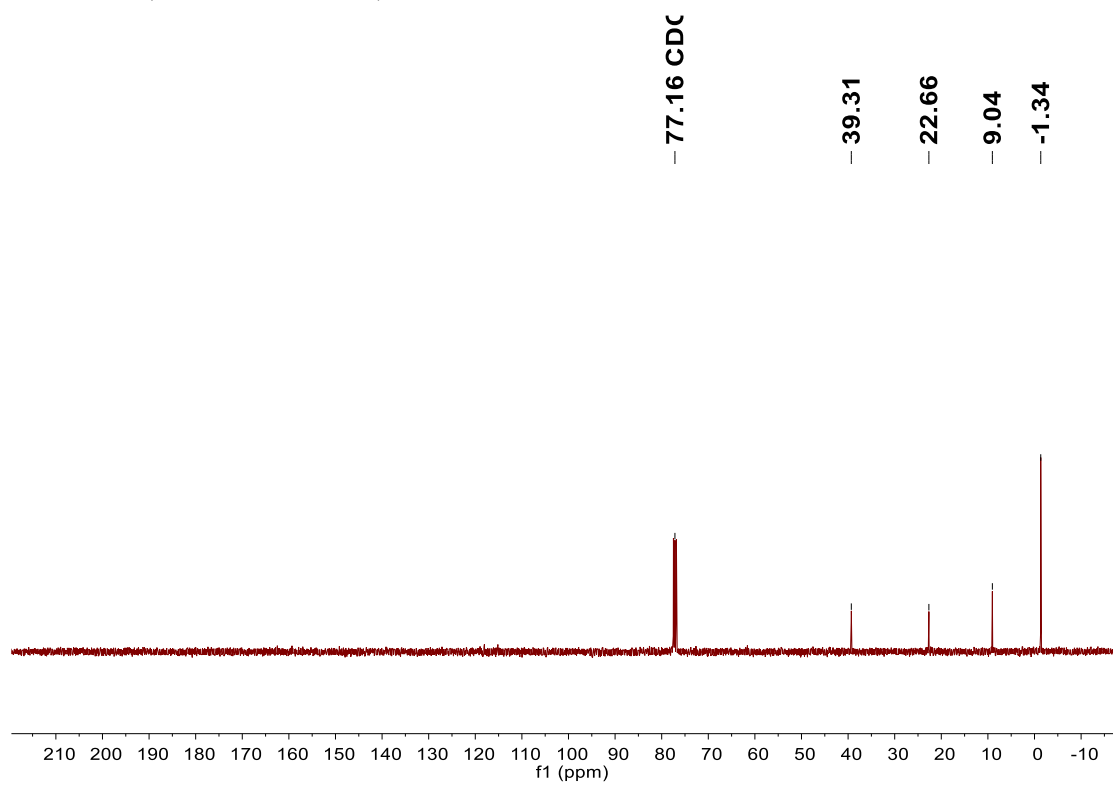



# Compound Seleno-SLAP 2

$^1\text{H}$  NMR (400 MHz,  $\text{CDCl}_3$ )

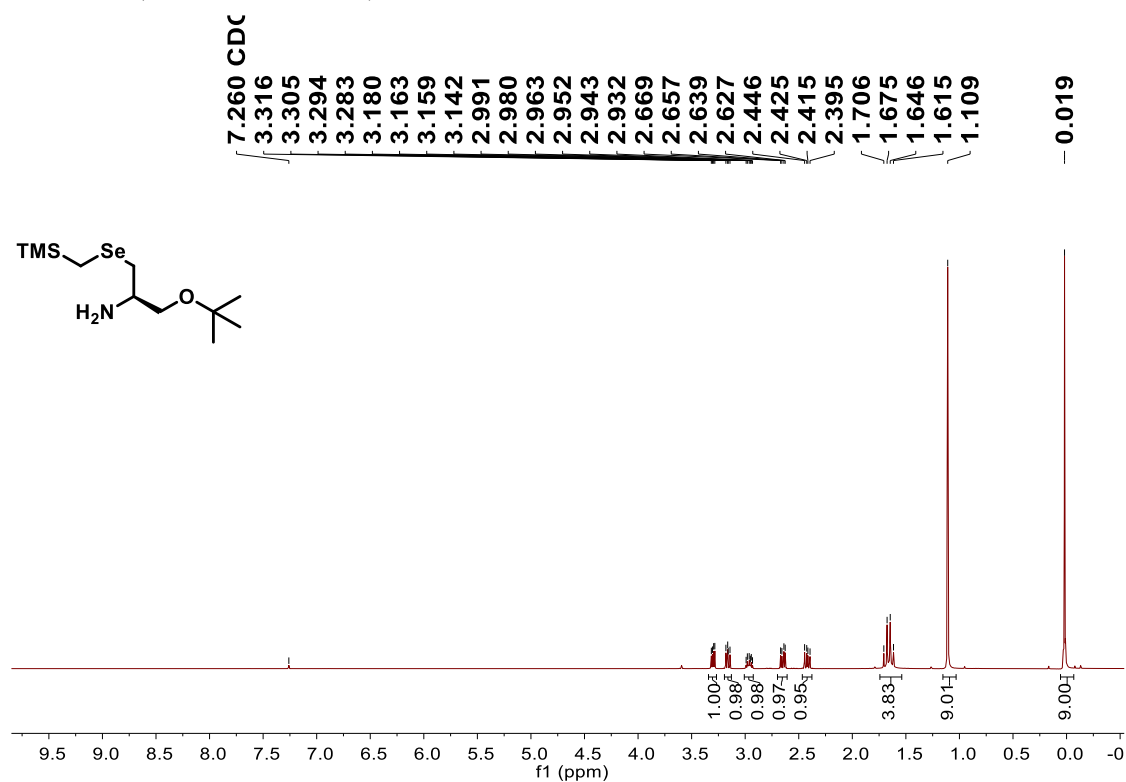

$^{13}\text{C}$  NMR (101 MHz,  $\text{CDCl}_3$ )

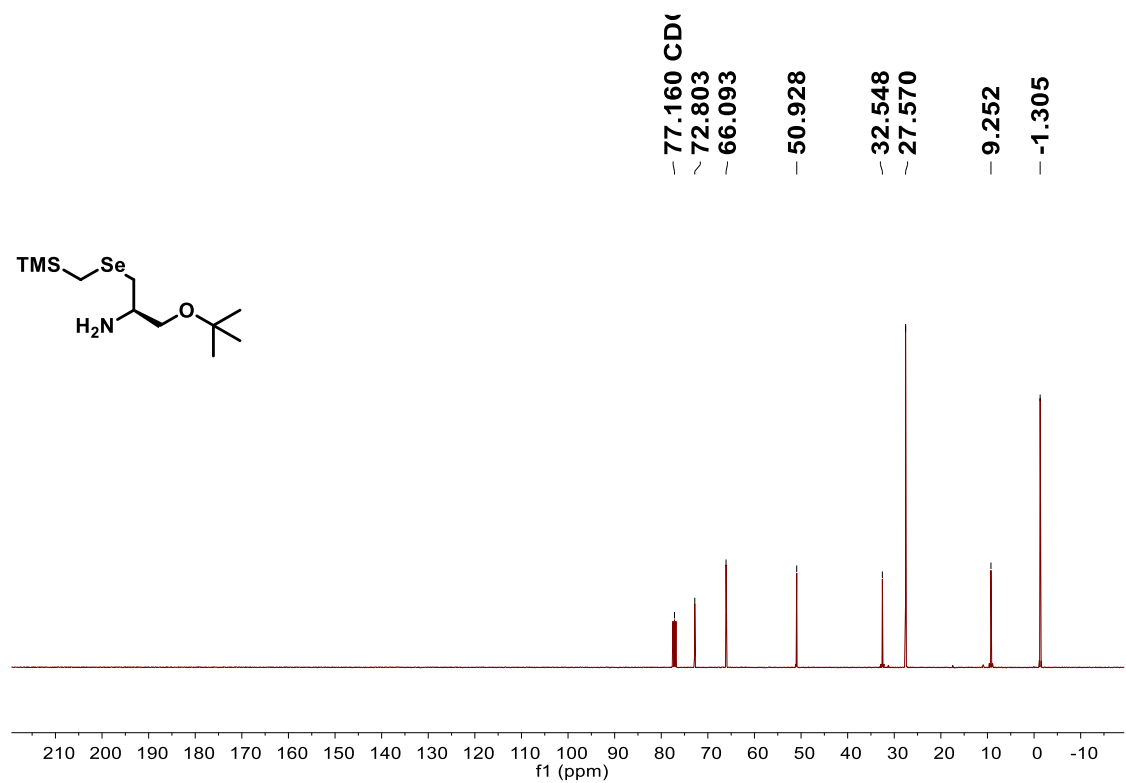



# Compound Seleno-SLAP 3

$^1\text{H}$  NMR (600 MHz,  $\text{CDCl}_3$ )

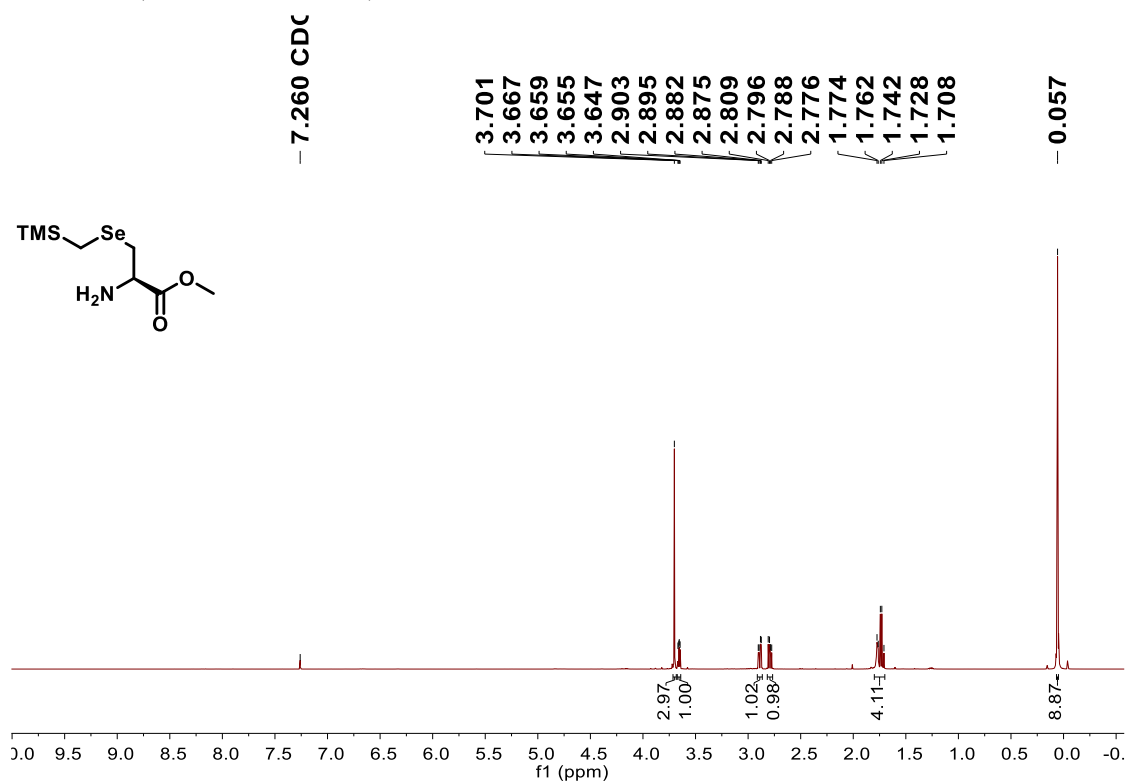

$^{13}\text{C}$  NMR (151 MHz,  $\text{CDCl}_3$ )

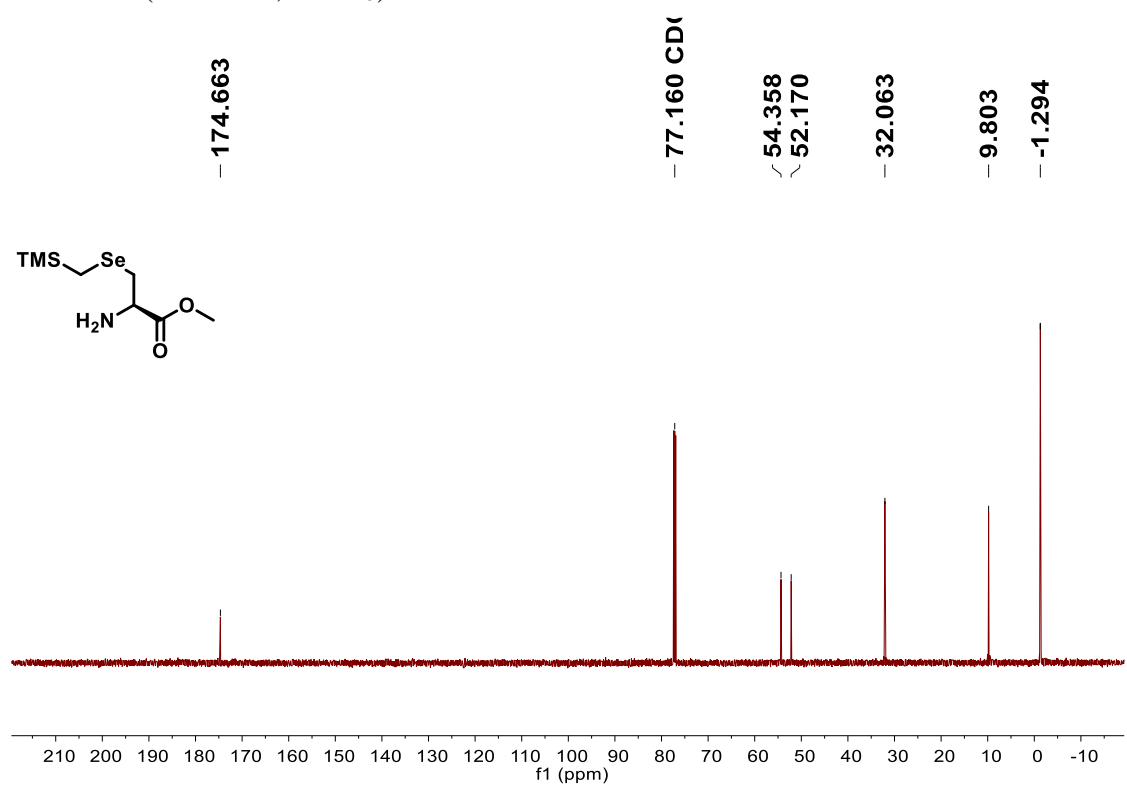



# Compound 16

$^1\text{H}$  NMR (400 MHz,  $\text{CDCl}_3$ )

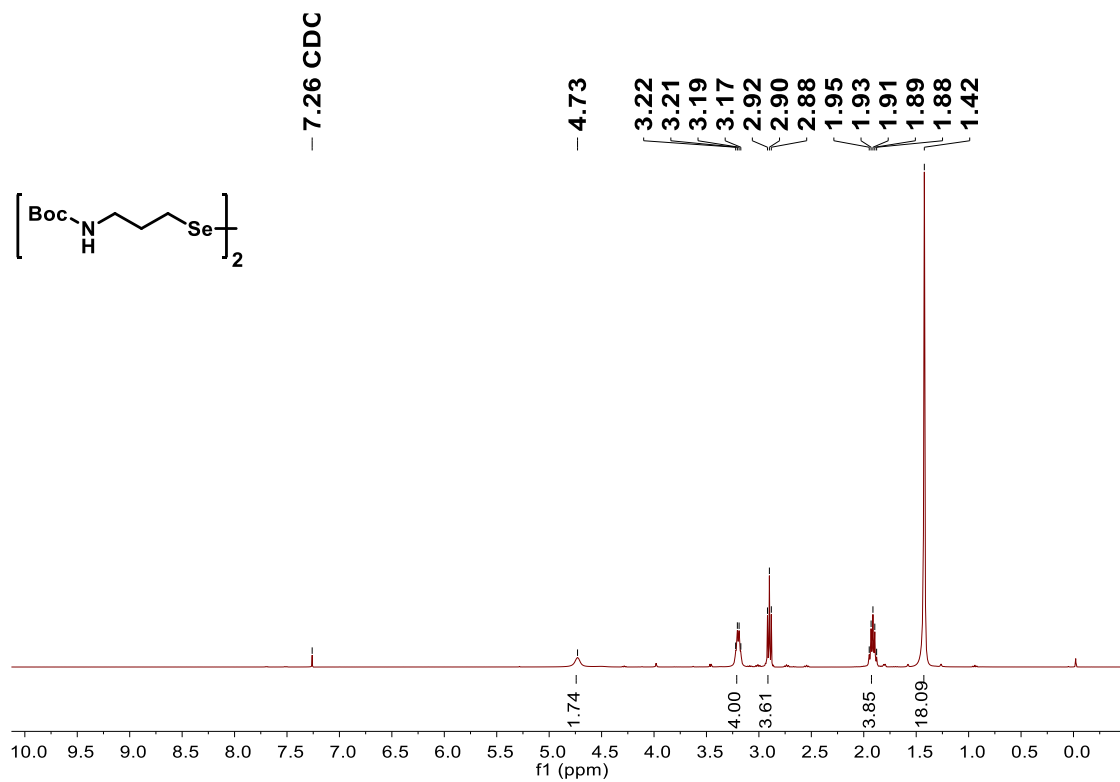

$^{13}\text{C}$  NMR (101 MHz,  $\text{CDCl}_3$ )

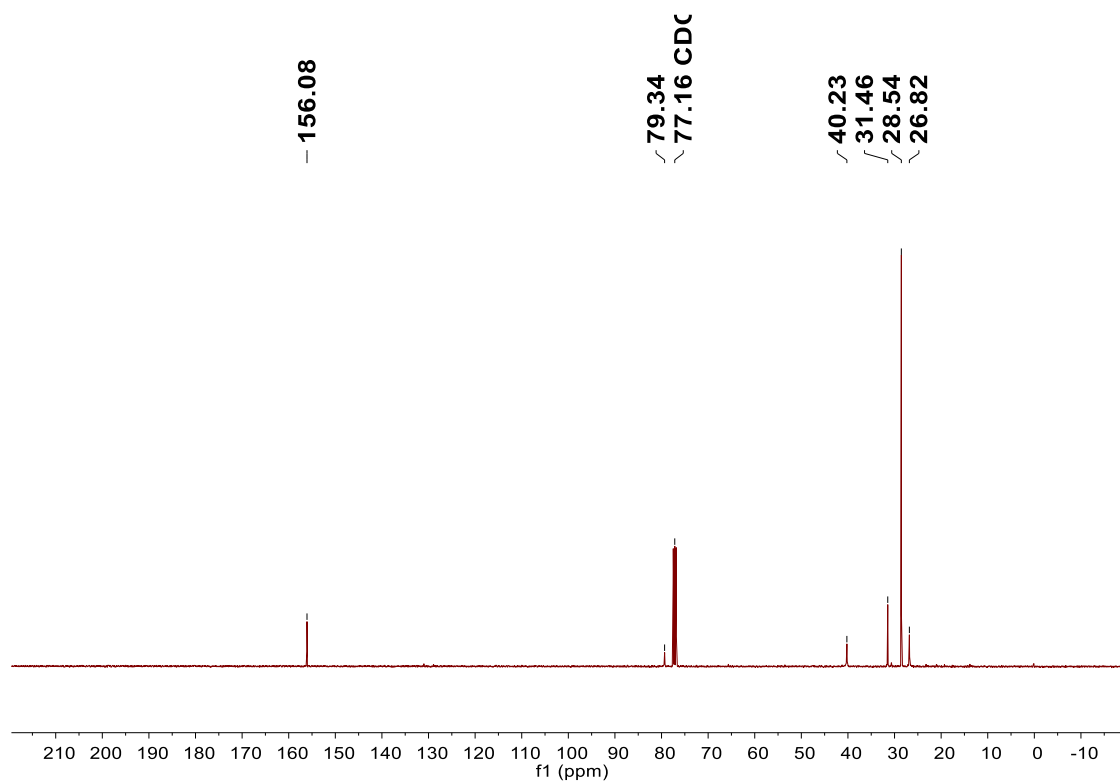



**Compound Seleno-SLAP 4**

$^1\text{H}$  NMR (400 MHz,  $\text{CDCl}_3$ )

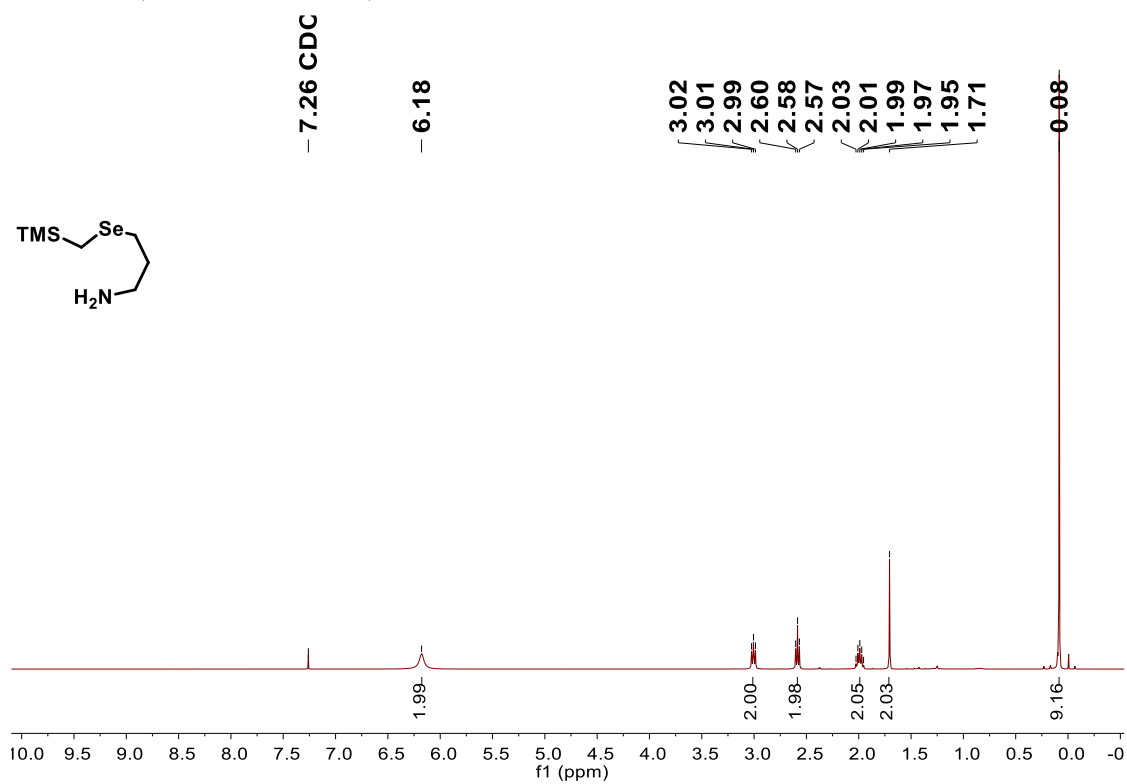

$^{13}\text{C}$  NMR (101 MHz,  $\text{CDCl}_3$ )

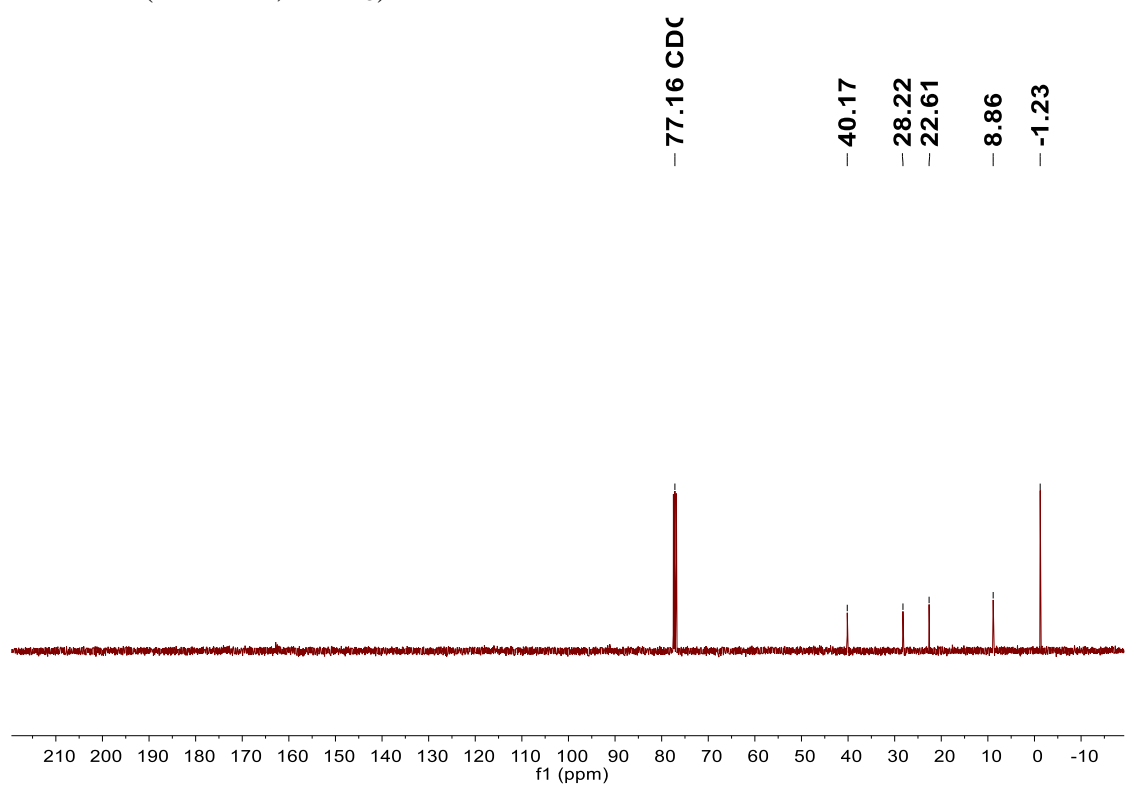



# Compound Seleno-SLAP 5

$^1\text{H}$  NMR (400 MHz,  $\text{CDCl}_3$ )

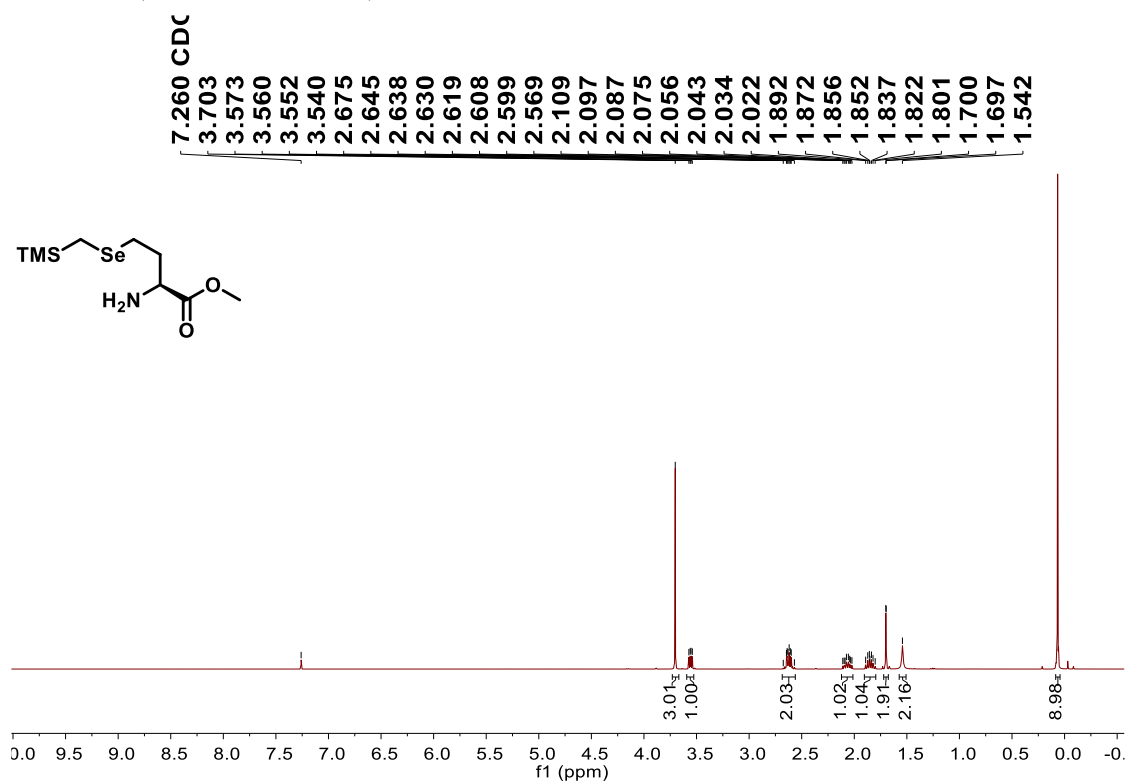

$^{13}\text{C}$  NMR (101 MHz,  $\text{CDCl}_3$ )

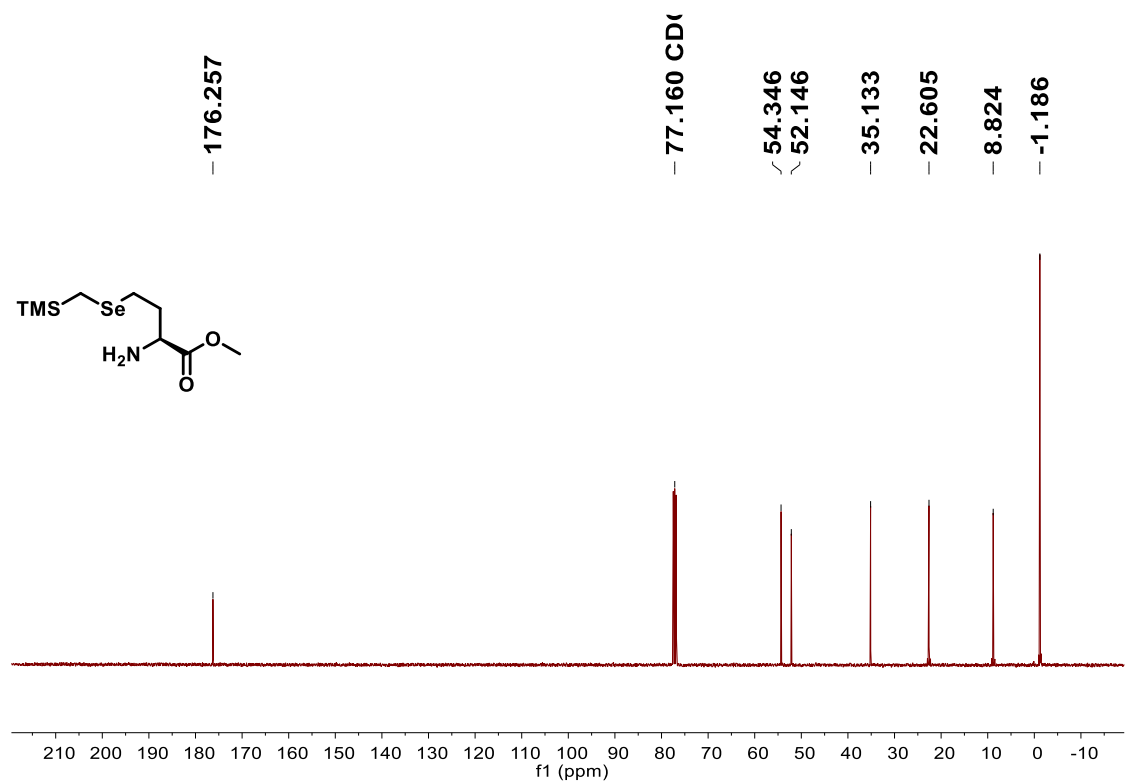



# Compound 22b

$^1\text{H}$  NMR (400 MHz,  $\text{CDCl}_3$ )

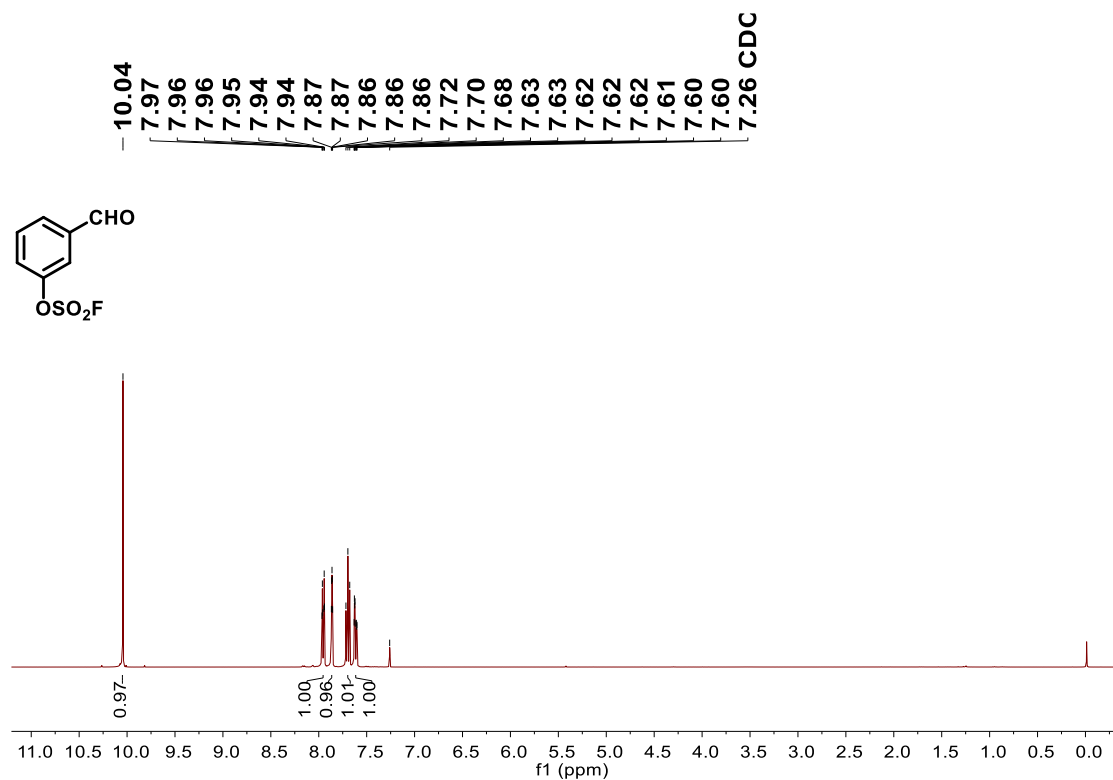

$^{13}\text{C}$  NMR (101 MHz,  $\text{CDCl}_3$ )

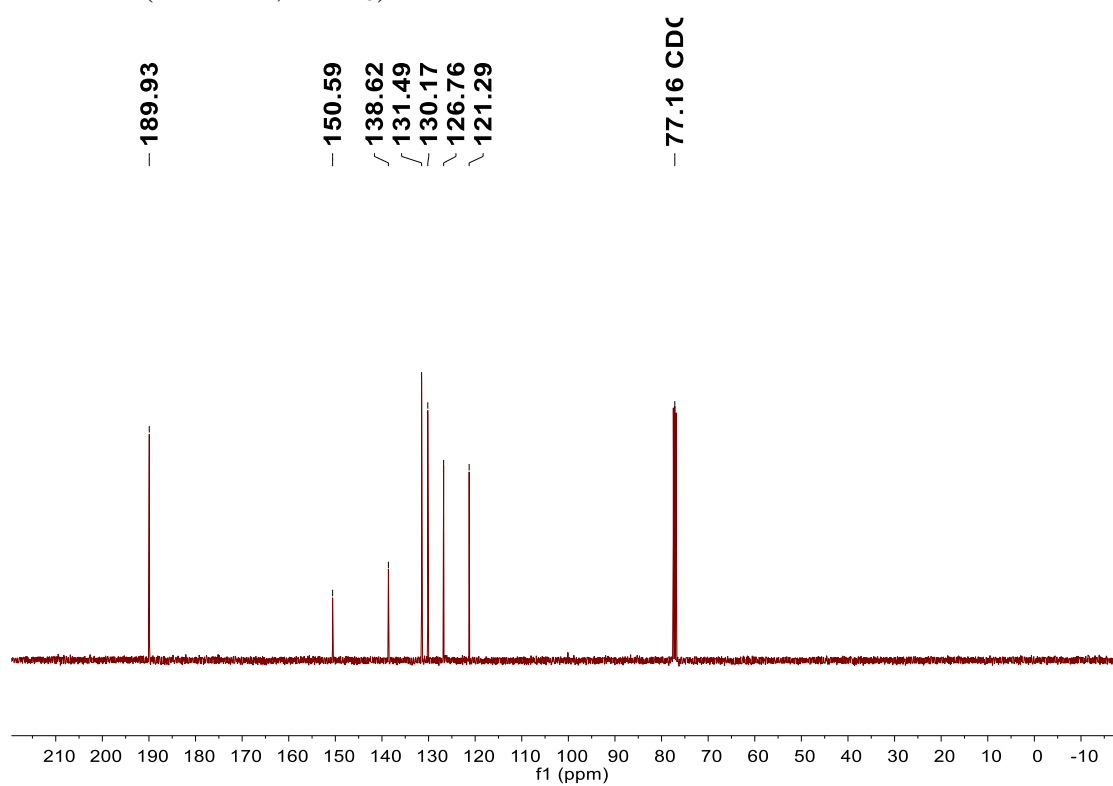



$^{19}\text{F}$  NMR (376 MHz,  $\text{CDCl}_3$ )

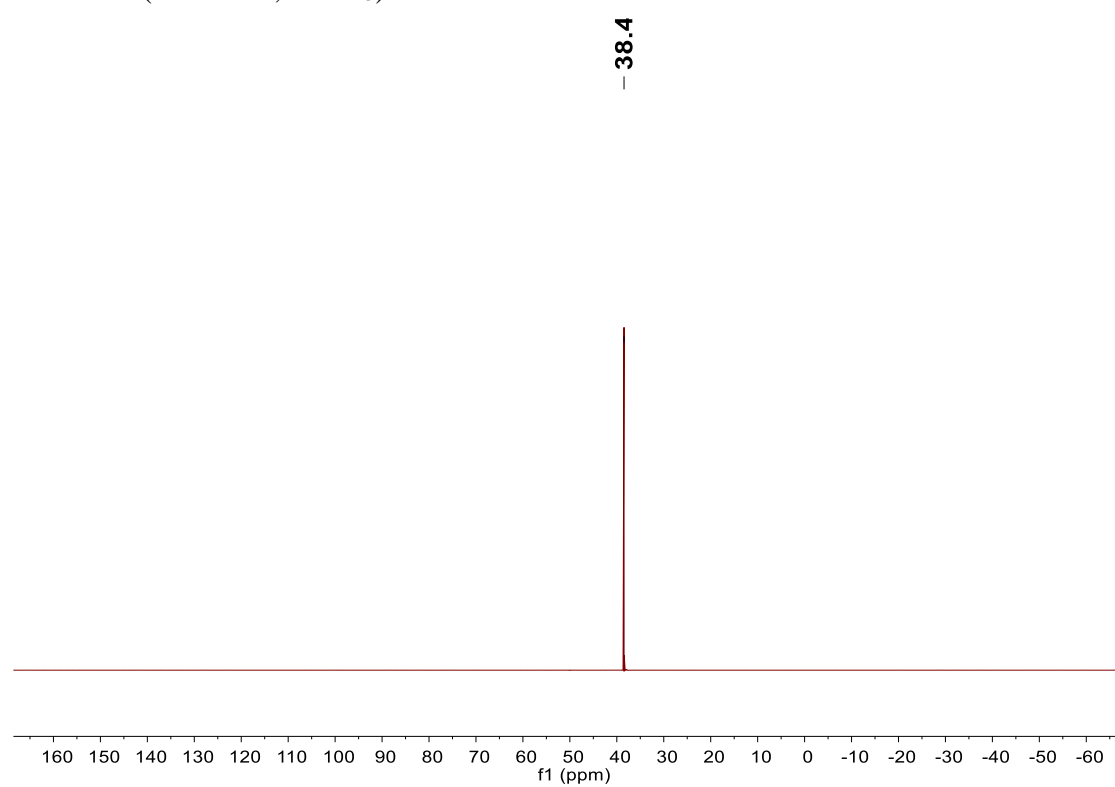



# Compound 30

$^1\text{H}$  NMR (400 MHz,  $\text{CDCl}_3$ )

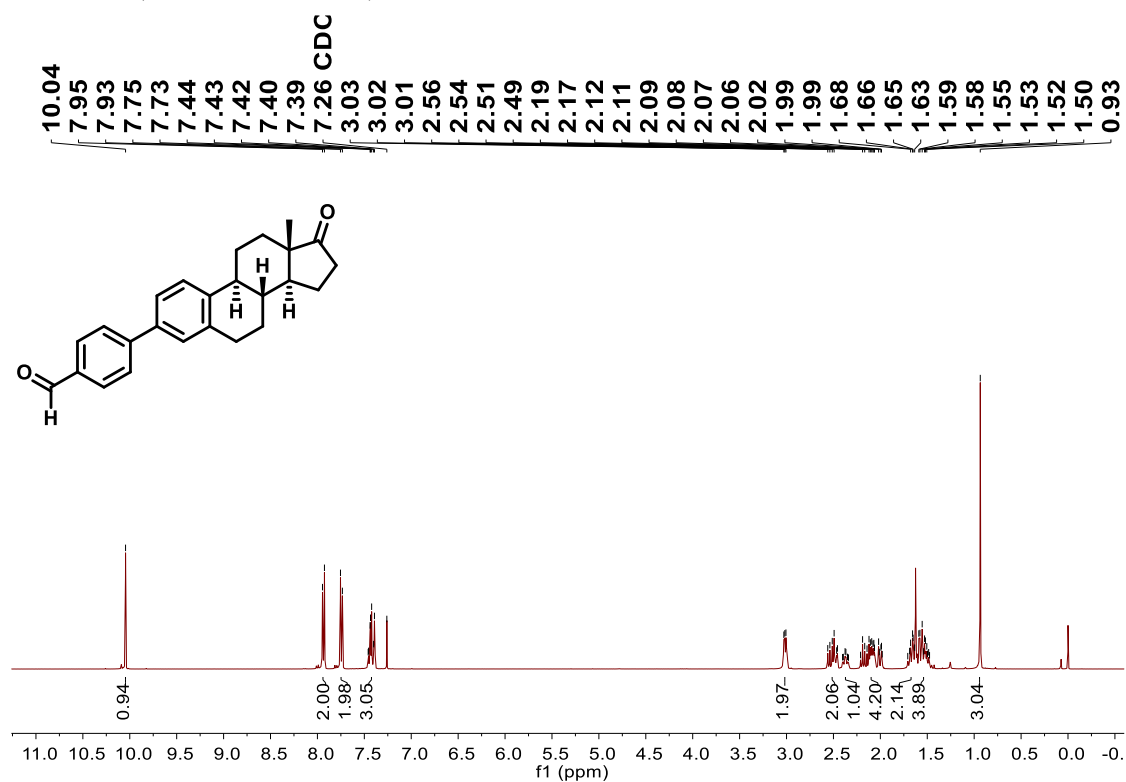

$^{13}\text{C}$  NMR (101 MHz,  $\text{CDCl}_3$ )

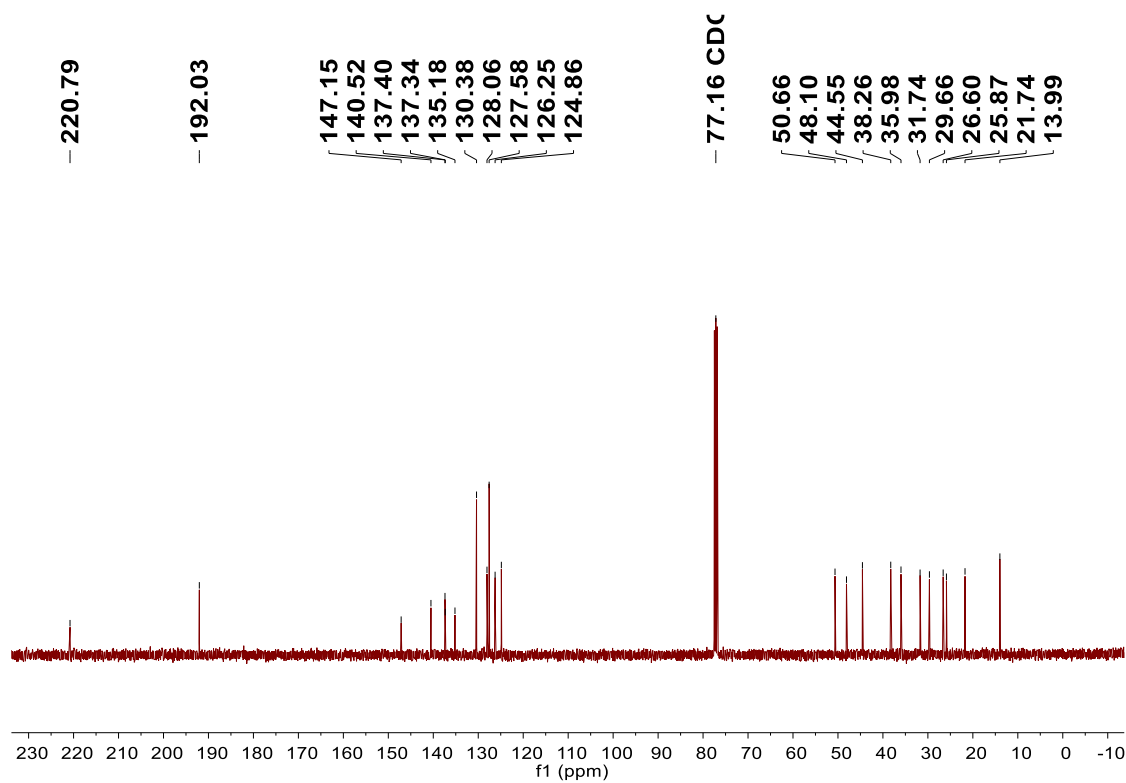



# Compound 33

$^1\text{H}$  NMR (400 MHz,  $\text{CDCl}_3$ )

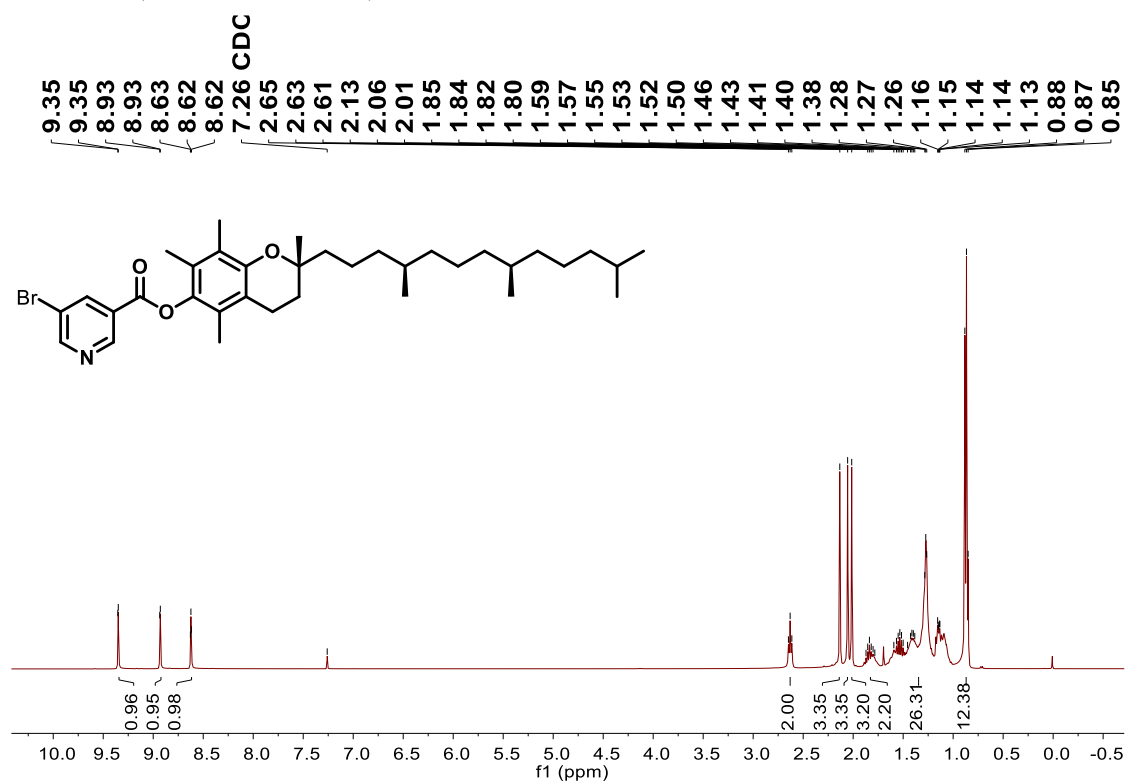

$^{13}\text{C}$  NMR (101 MHz,  $\text{CDCl}_3$ )

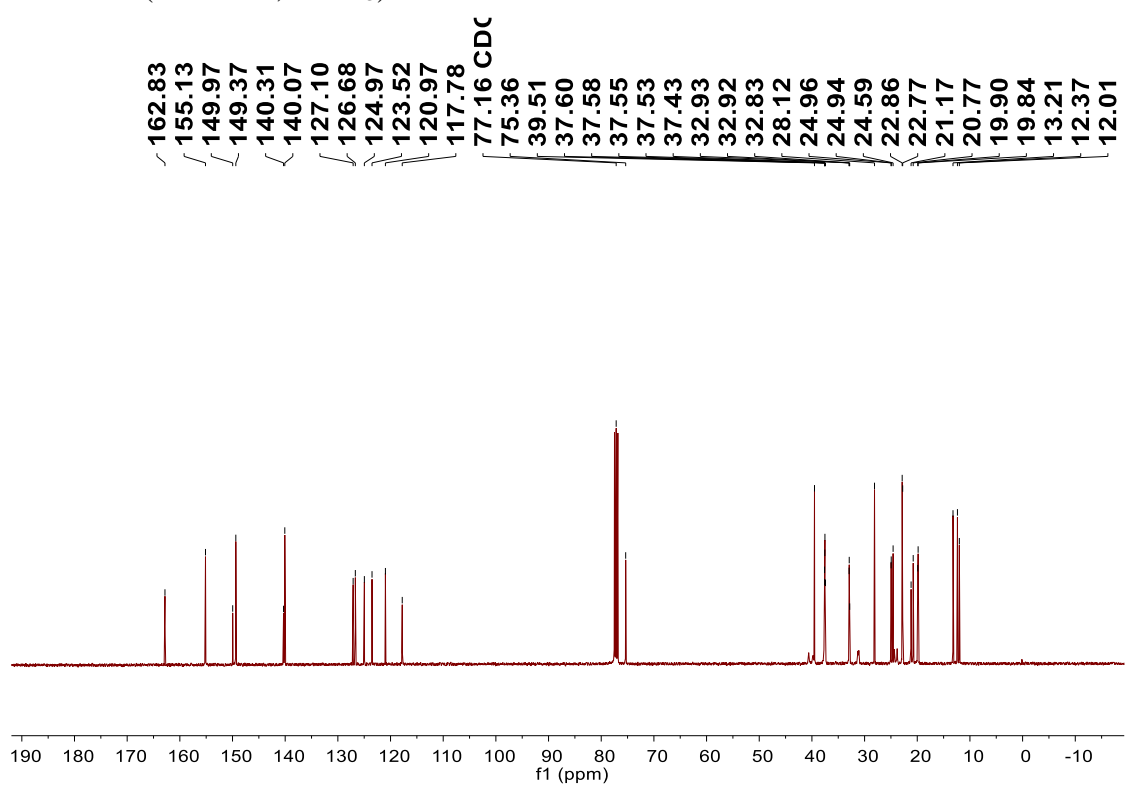



# Compound 34

$^1\text{H}$  NMR (400 MHz,  $\text{CDCl}_3$ )

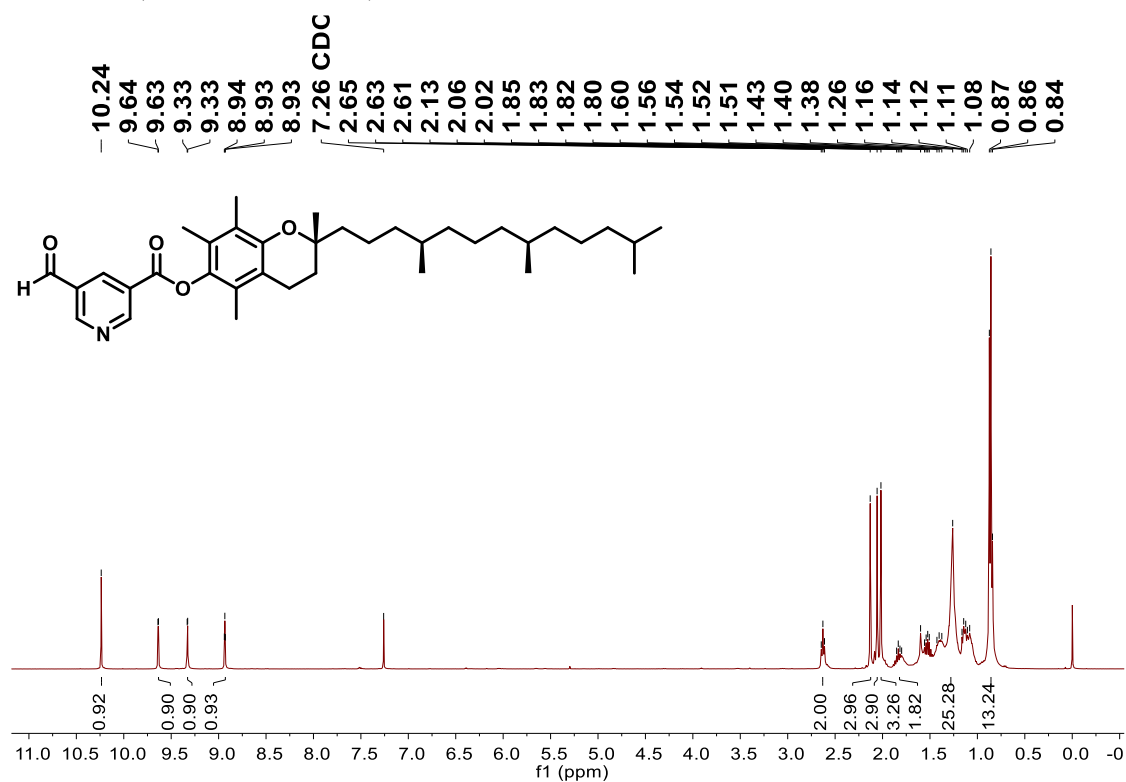

$^{13}\text{C}$  NMR (101 MHz,  $\text{CDCl}_3$ )

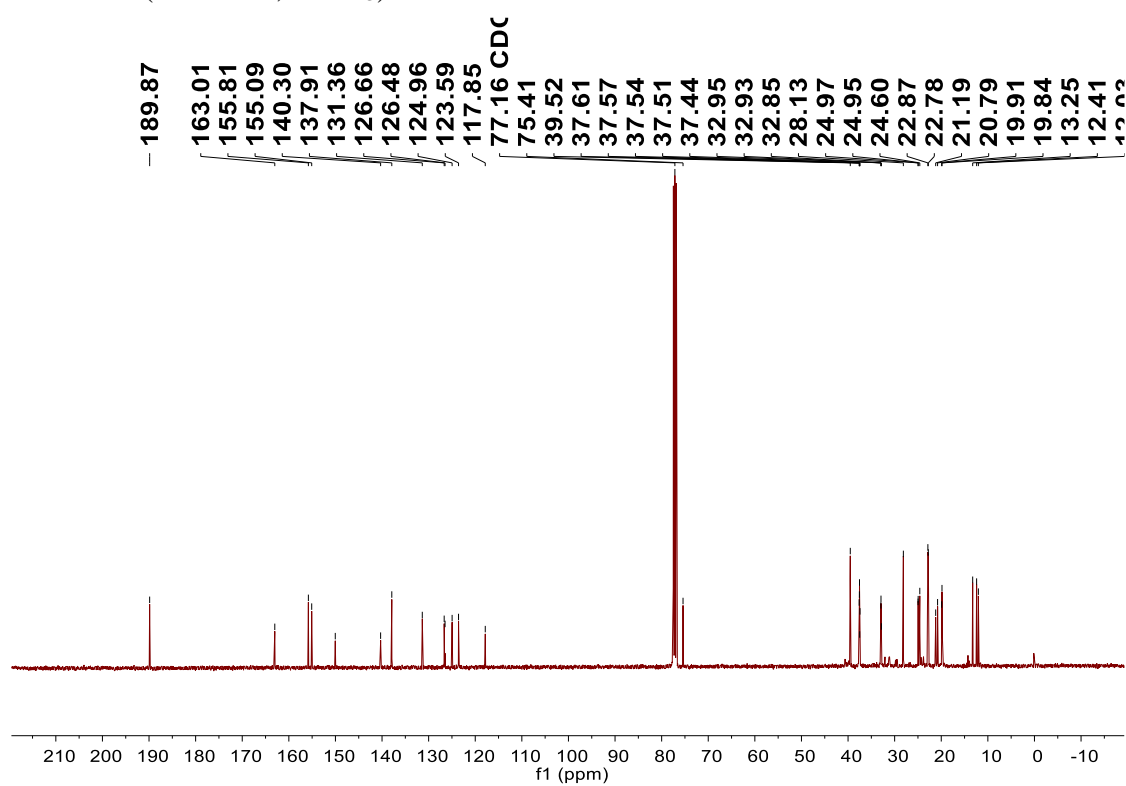



# Compound 3b

$^1\text{H}$  NMR (400 MHz,  $\text{CDCl}_3$ )

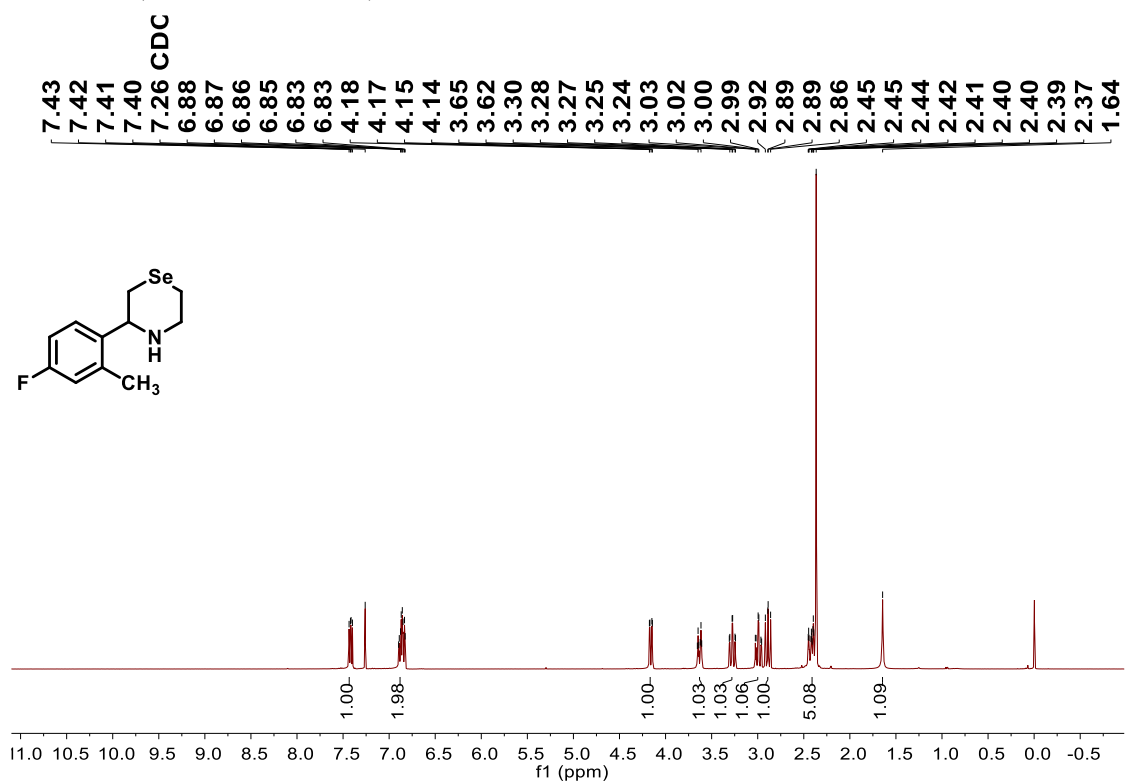

$^{13}\text{C}$  NMR (101 MHz,  $\text{CDCl}_3$ )

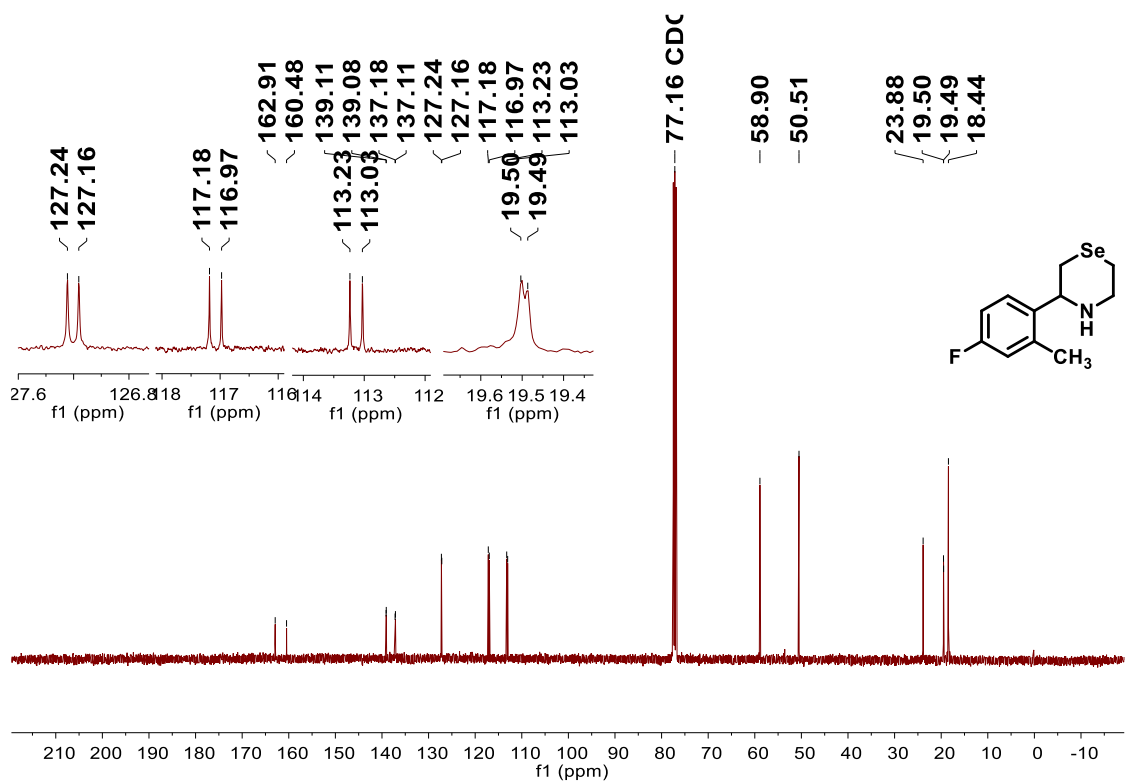



$^{19}\text{F}$  NMR (376 MHz,  $\text{CDCl}_3$ )

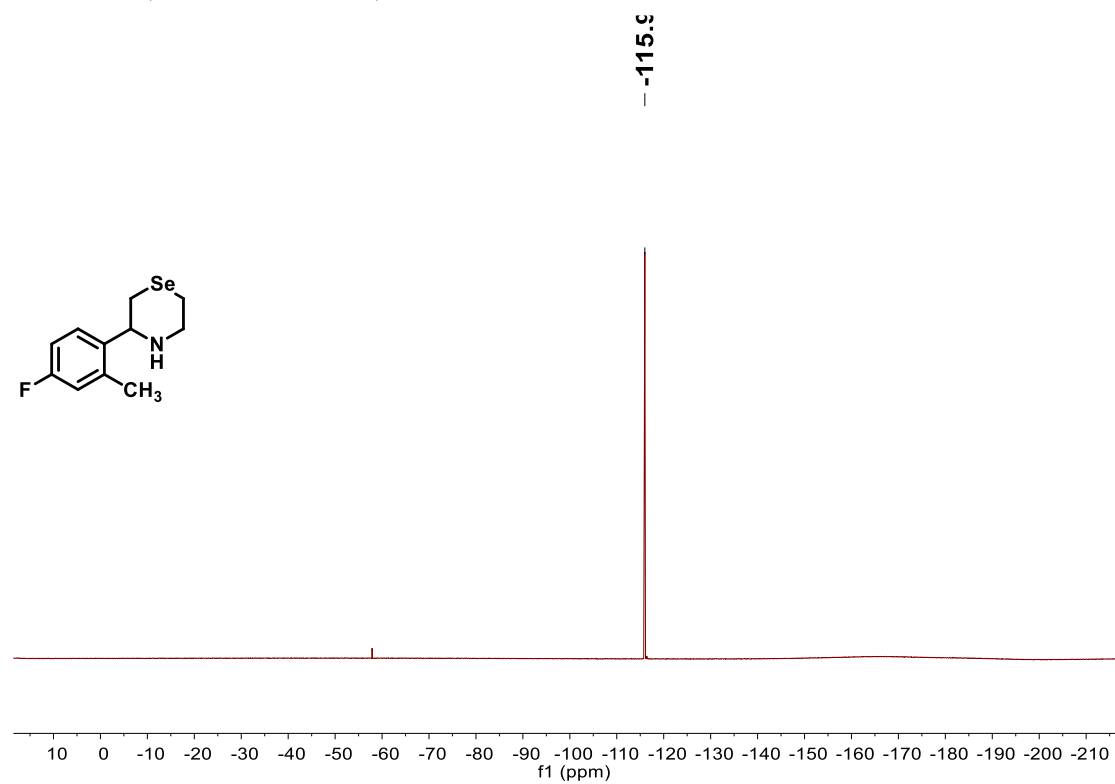



# Compound 3c

$^1\text{H}$  NMR (600 MHz,  $\text{CDCl}_3$ )

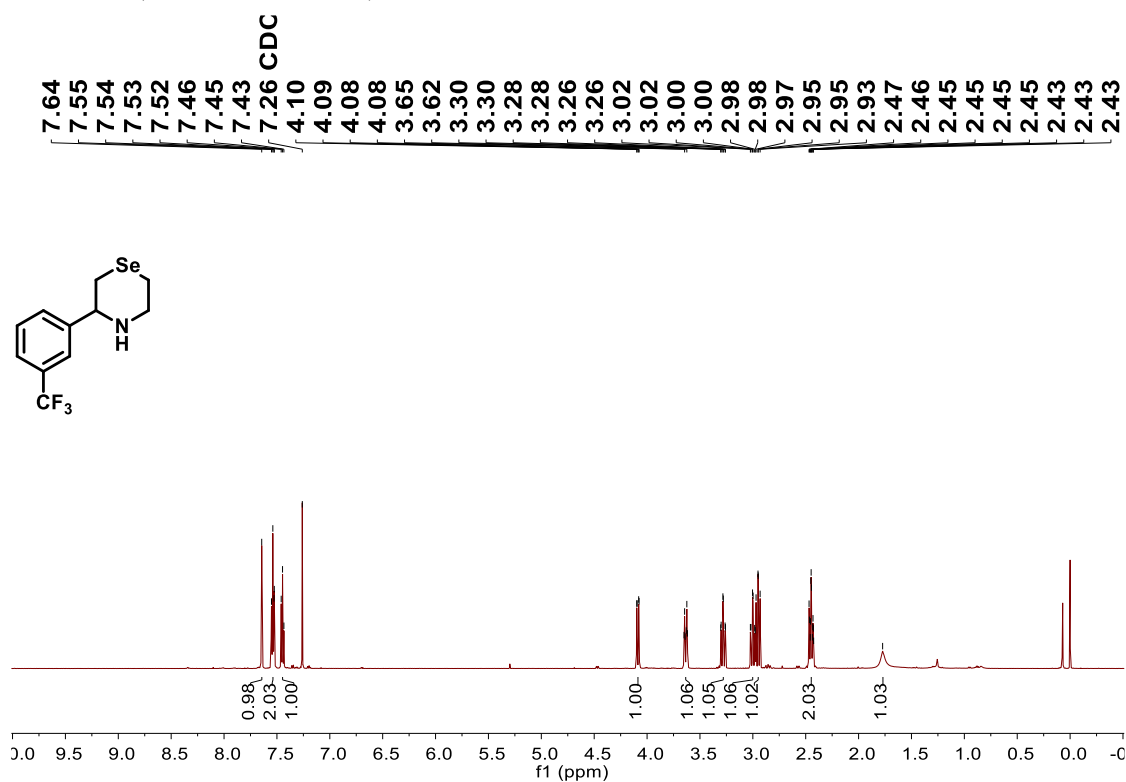

$^{13}\text{C}$  NMR (151 MHz,  $\text{CDCl}_3$ )

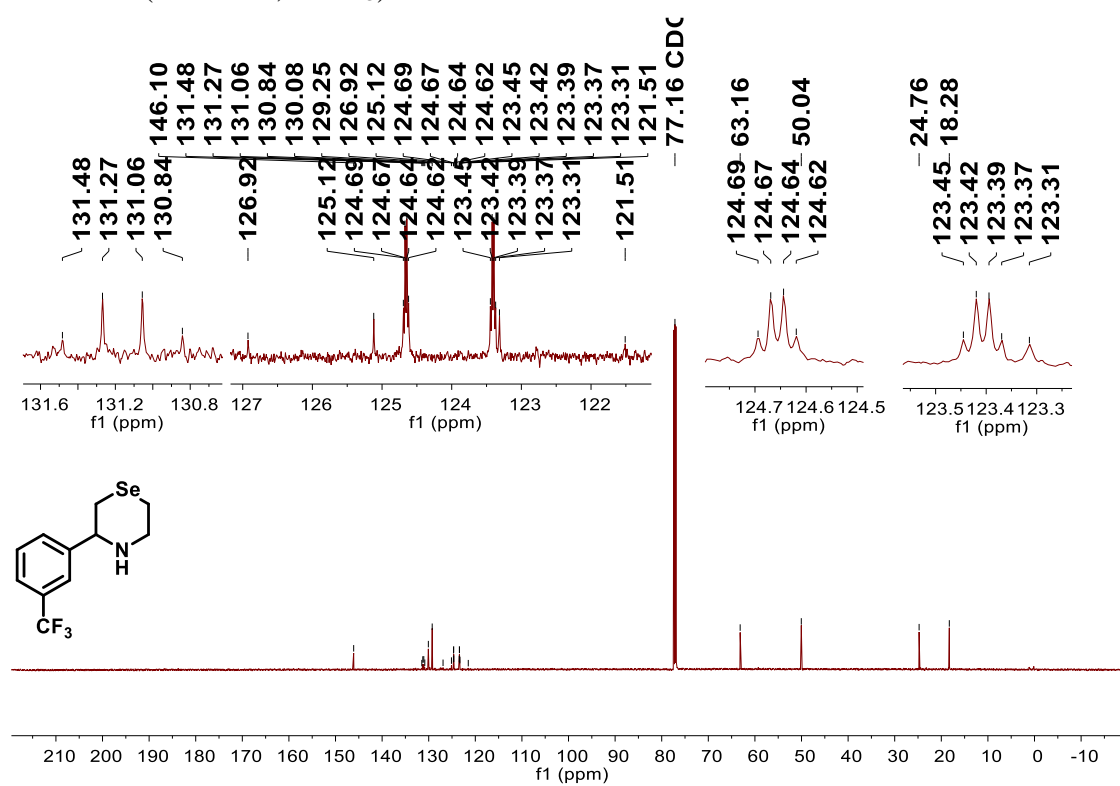



$^{19}\text{F}$  NMR (376 MHz,  $\text{CDCl}_3$ )

-62.5

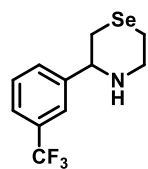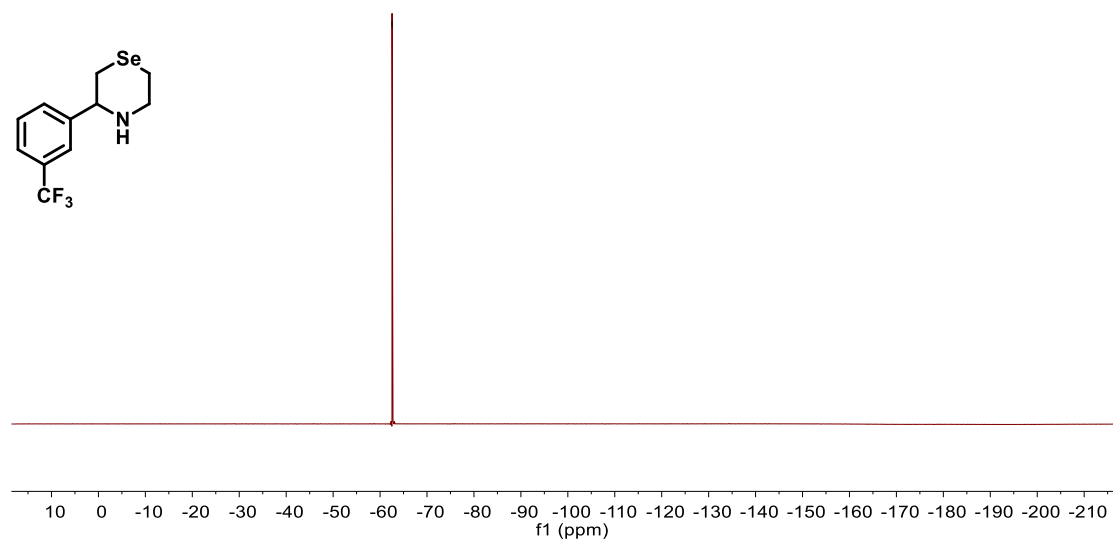



# Compound 3d

$^1\text{H}$  NMR (400 MHz,  $\text{CDCl}_3$ )

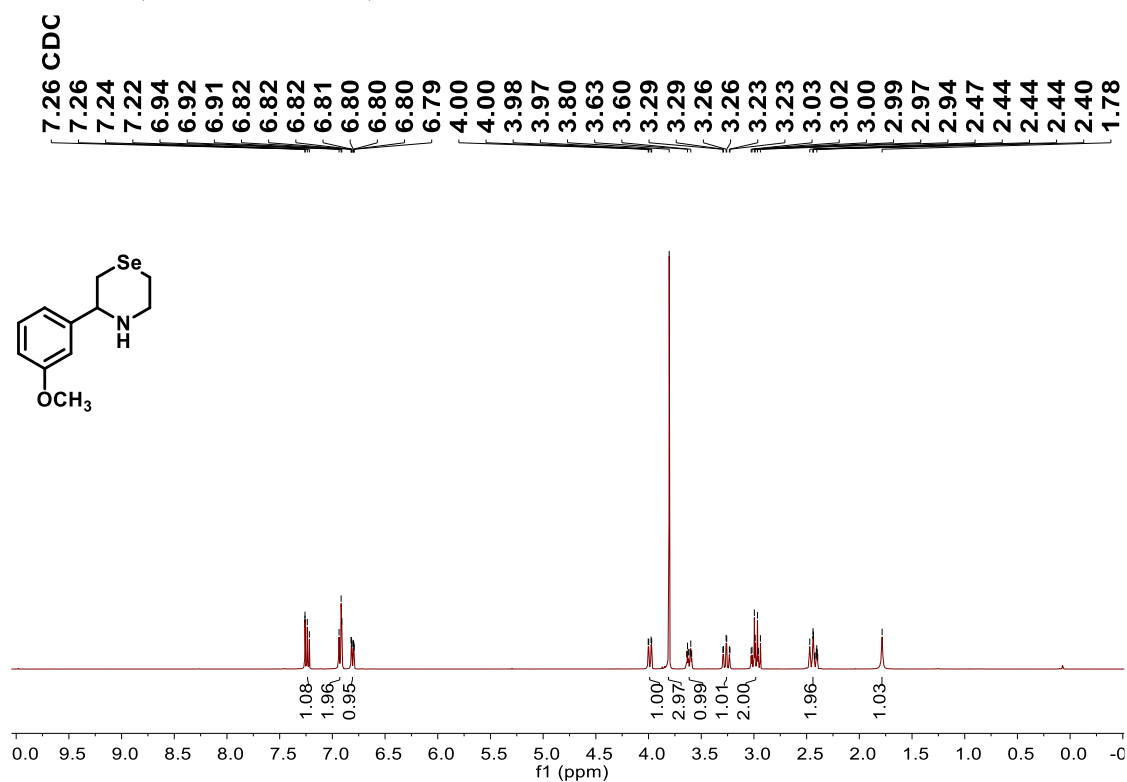

$^{13}\text{C}$  NMR (101 MHz,  $\text{CDCl}_3$ )

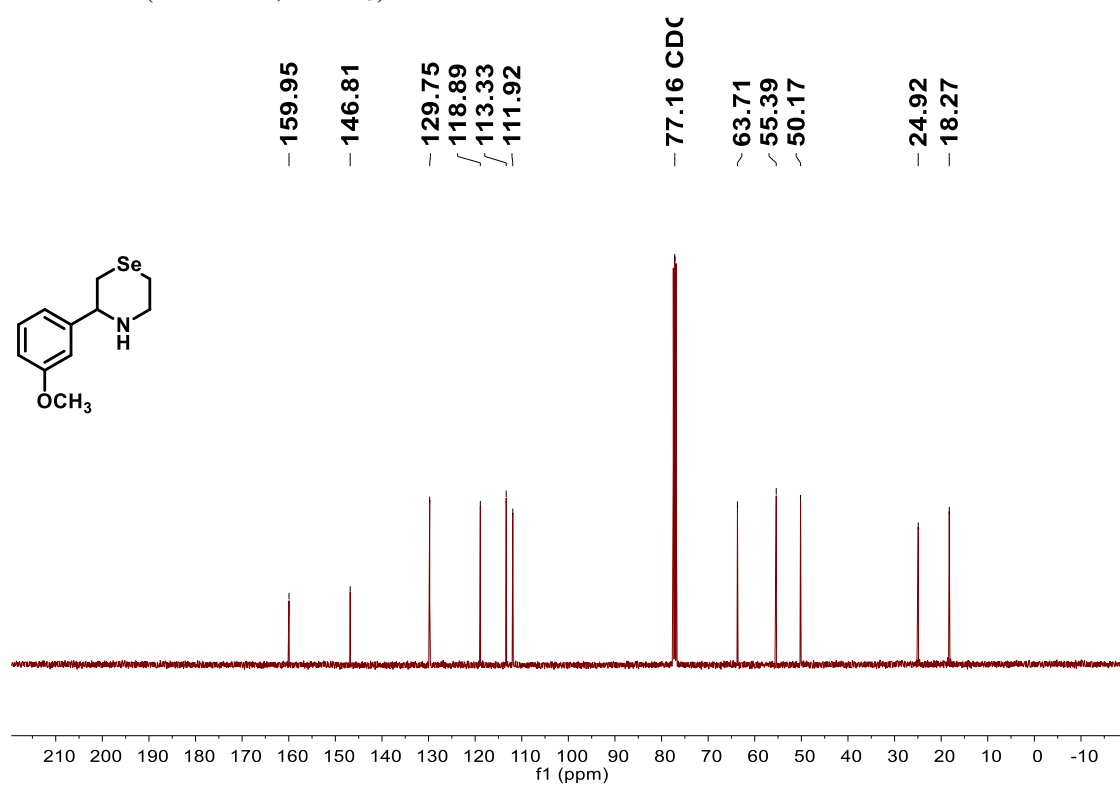



# Compound 3e

$^1\text{H}$  NMR (400 MHz,  $\text{CDCl}_3$ )

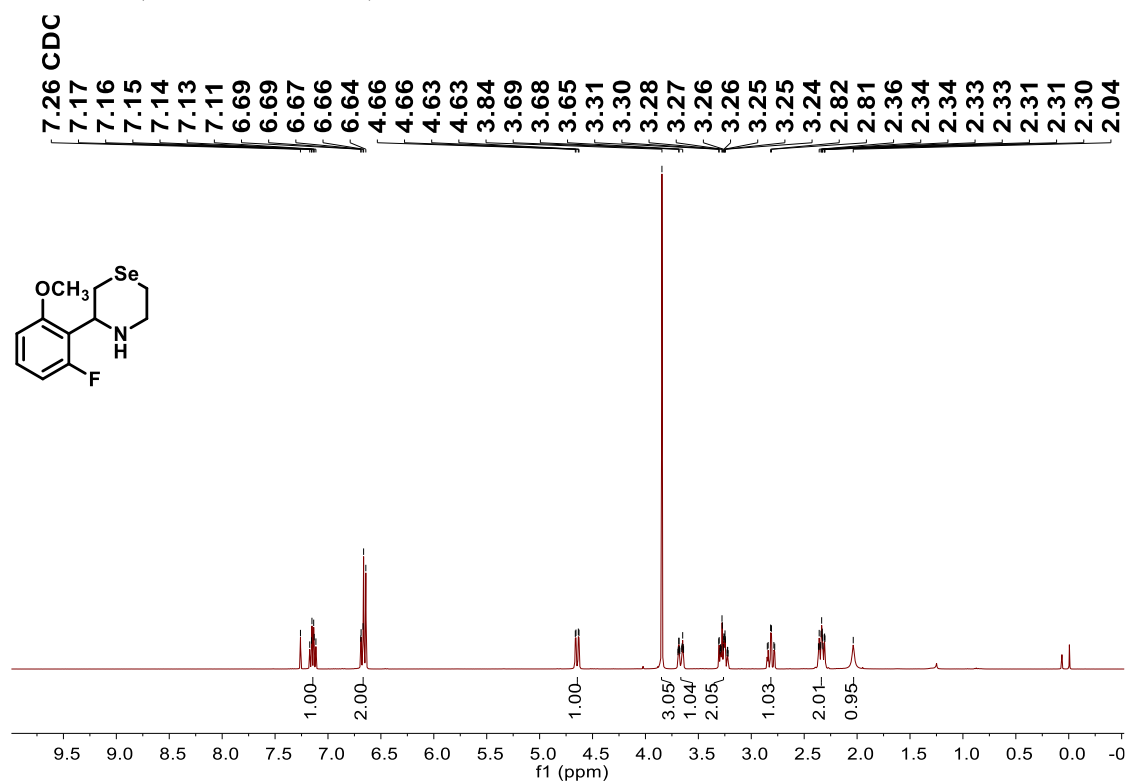

$^{13}\text{C}$  NMR (101 MHz,  $\text{CDCl}_3$ )

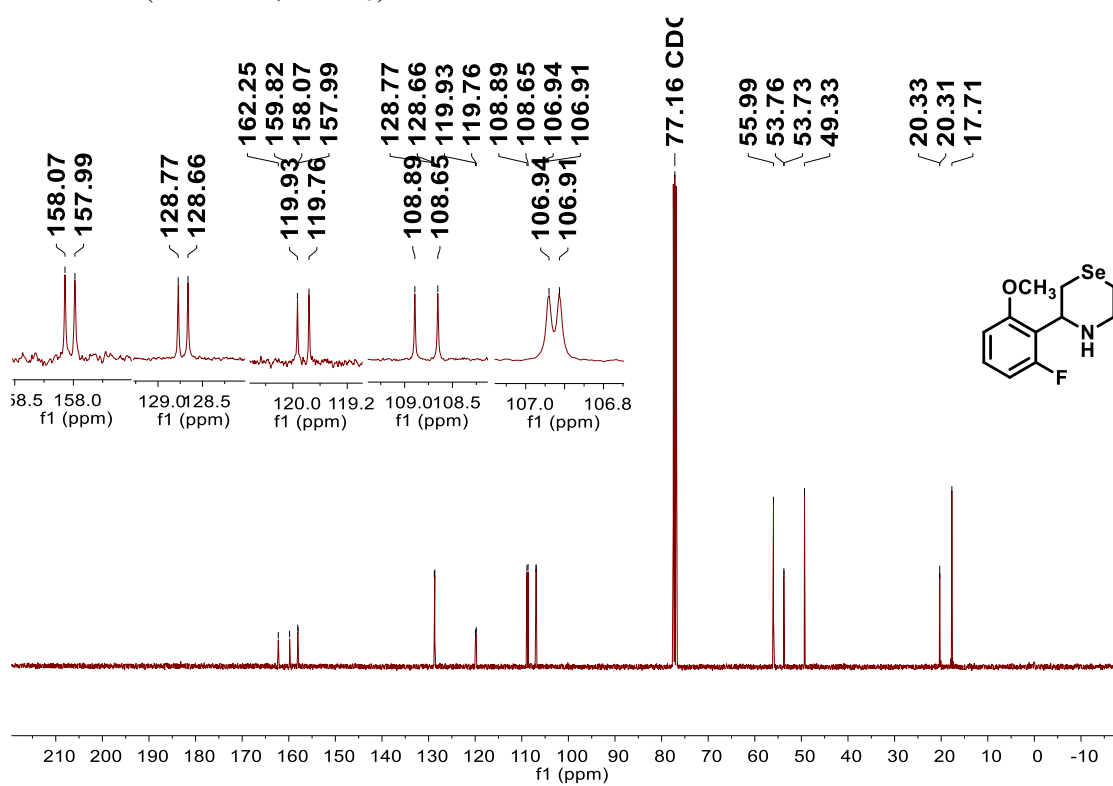



$^{19}\text{F}$  NMR (376 MHz,  $\text{CDCl}_3$ )

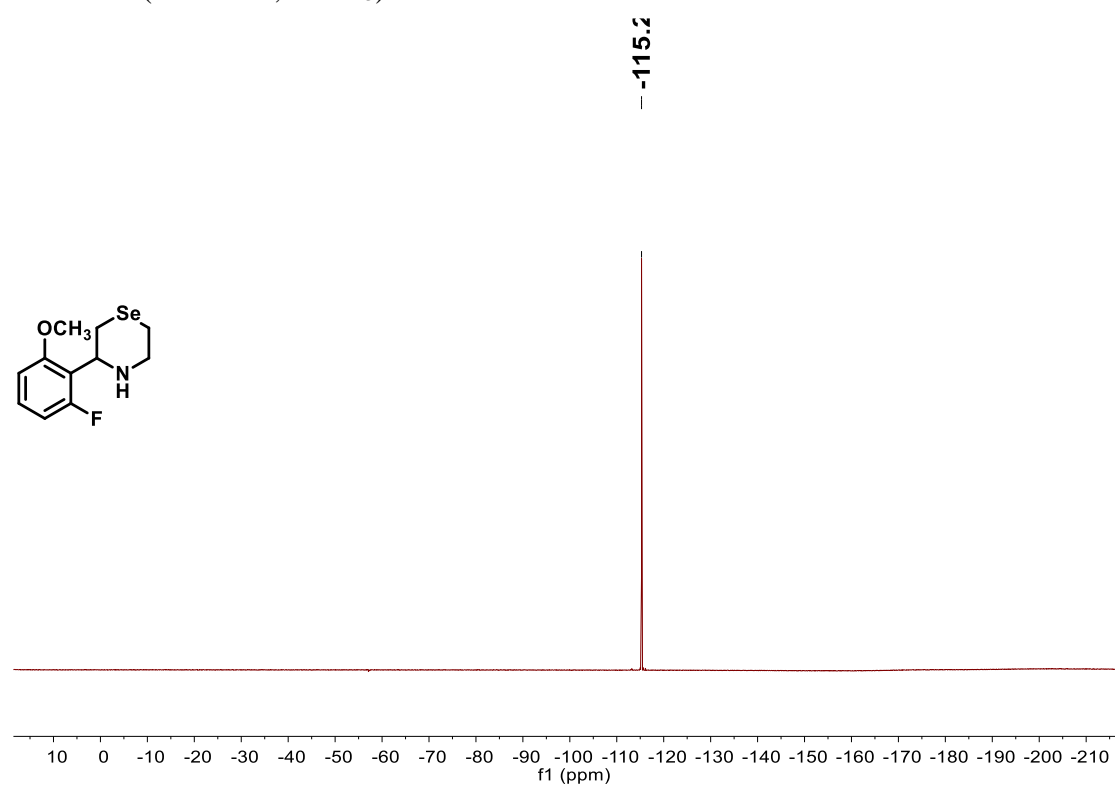



# Compound 3f

$^1\text{H}$  NMR (400 MHz,  $\text{CDCl}_3$ )

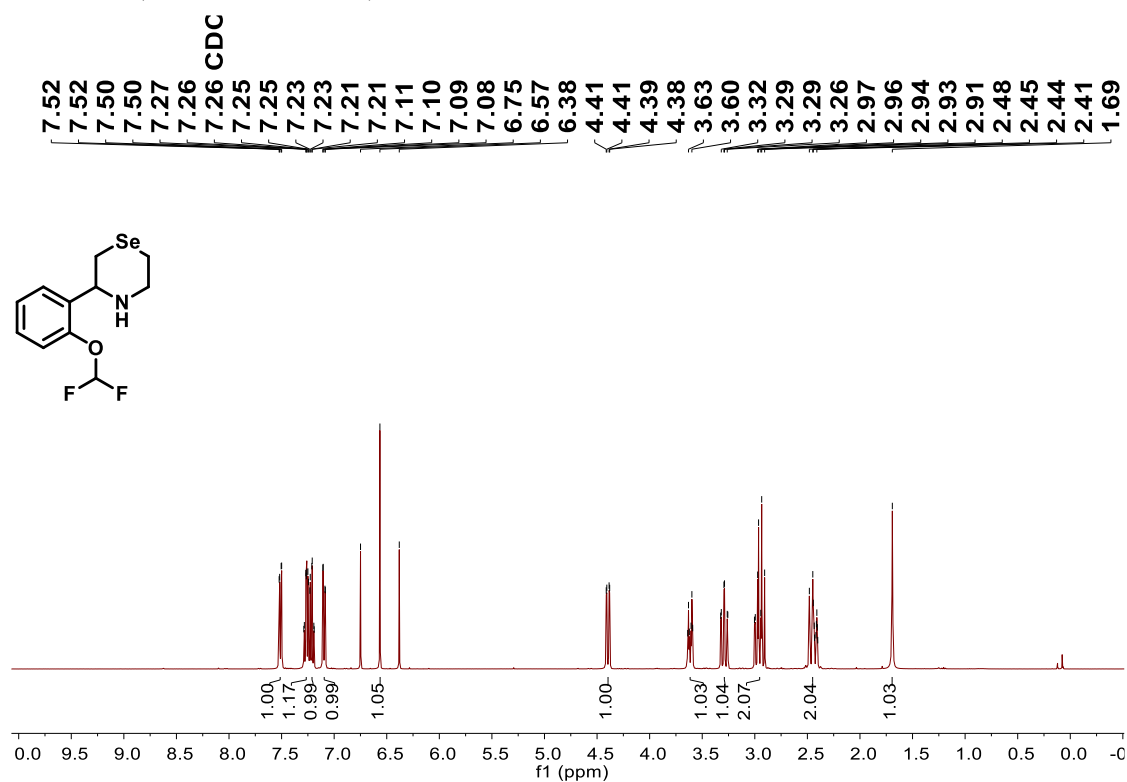

$^{13}\text{C}$  NMR (101 MHz,  $\text{CDCl}_3$ )

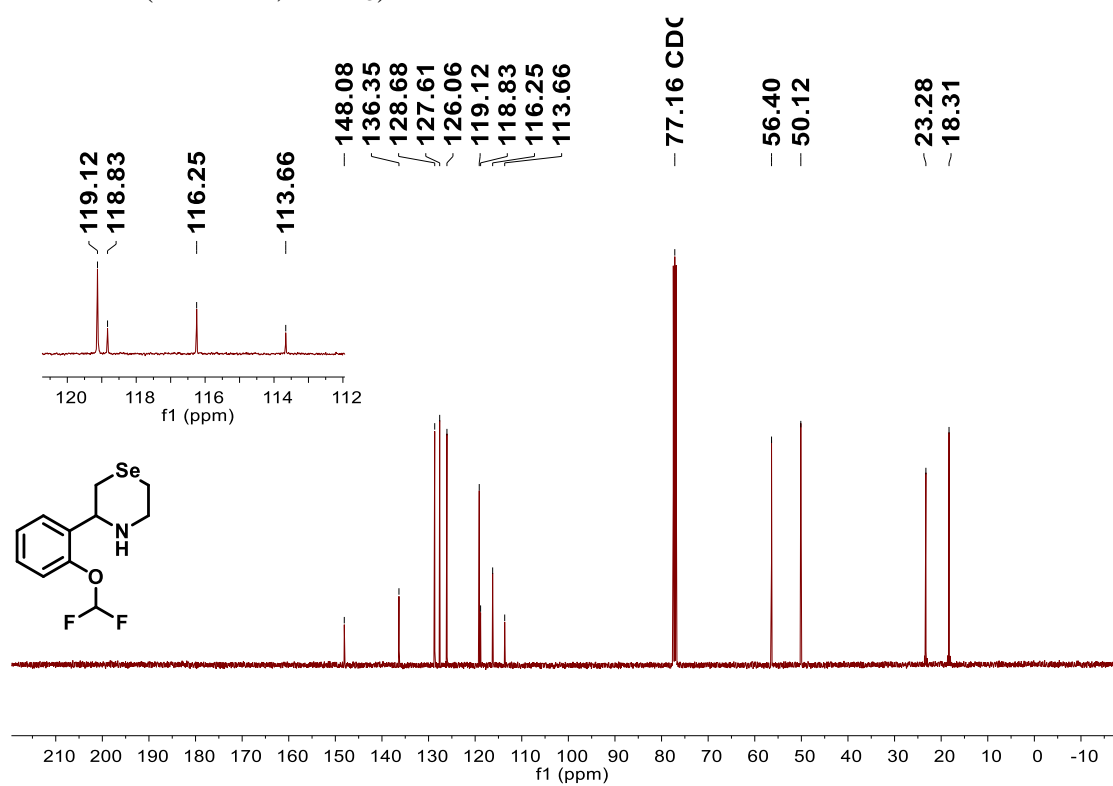



$^{19}\text{F}$  NMR (376 MHz,  $\text{CDCl}_3$ )

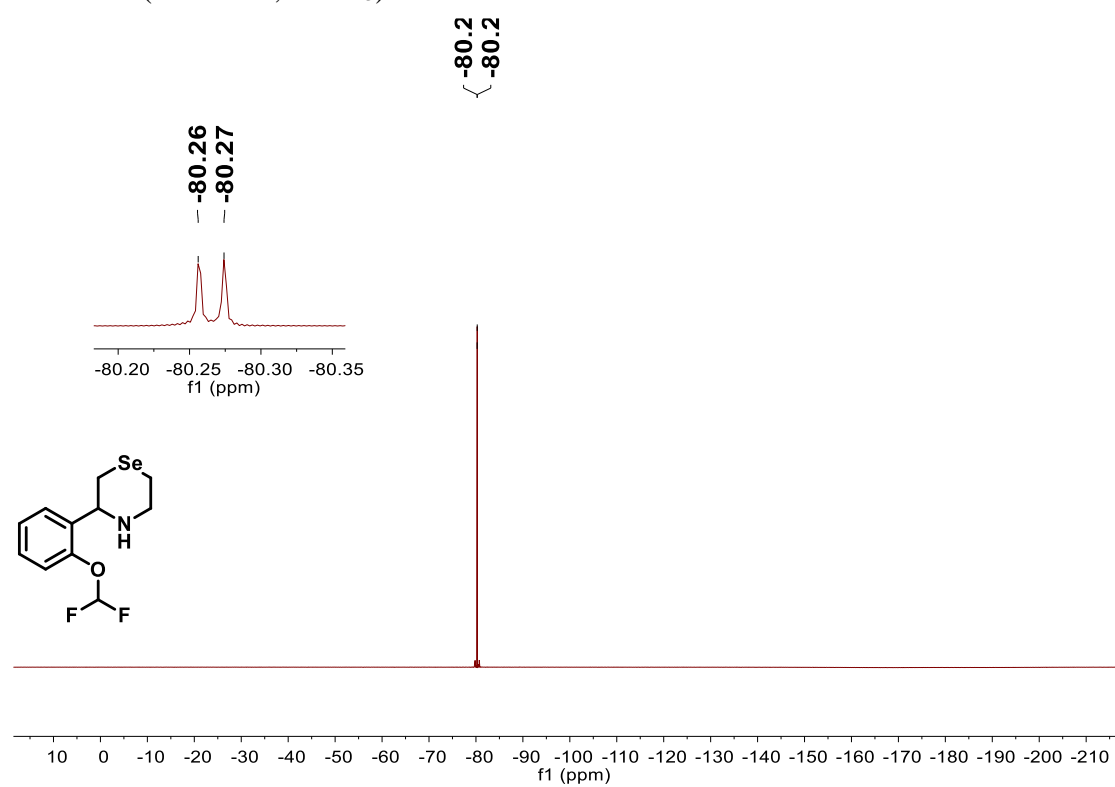



# Compound 3h

$^1\text{H}$  NMR (400 MHz,  $\text{CDCl}_3$ )

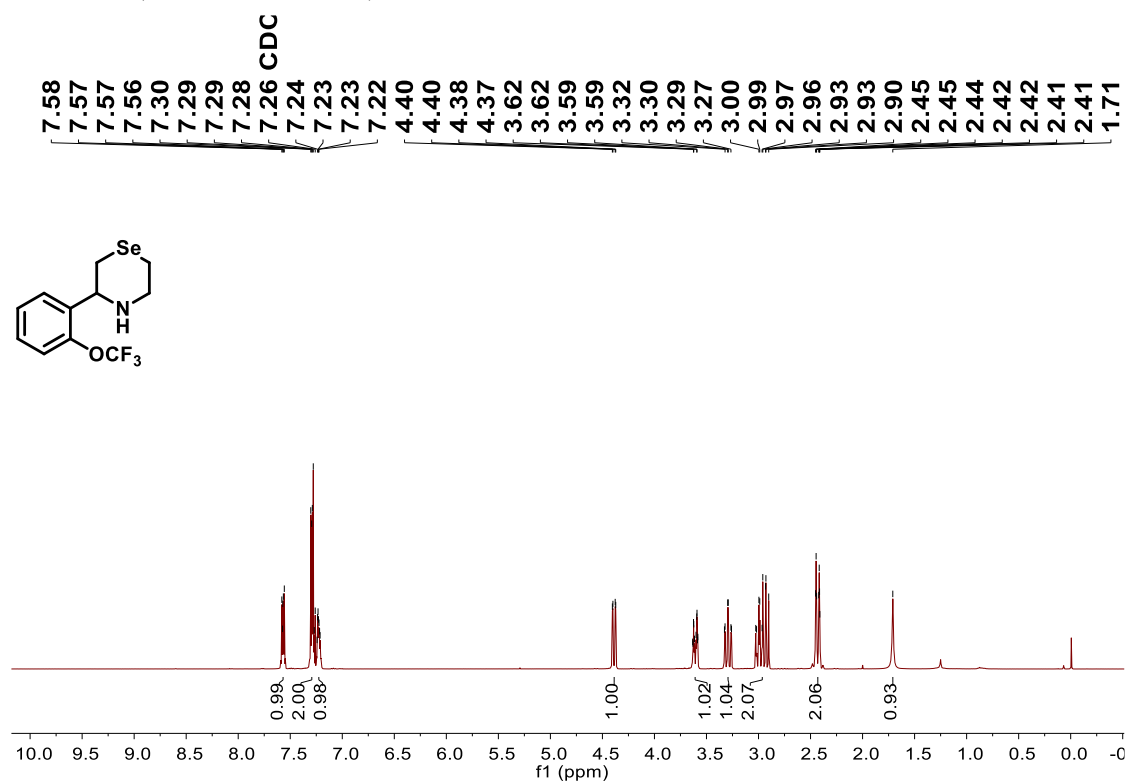

$^{13}\text{C}$  NMR (101 MHz,  $\text{CDCl}_3$ )

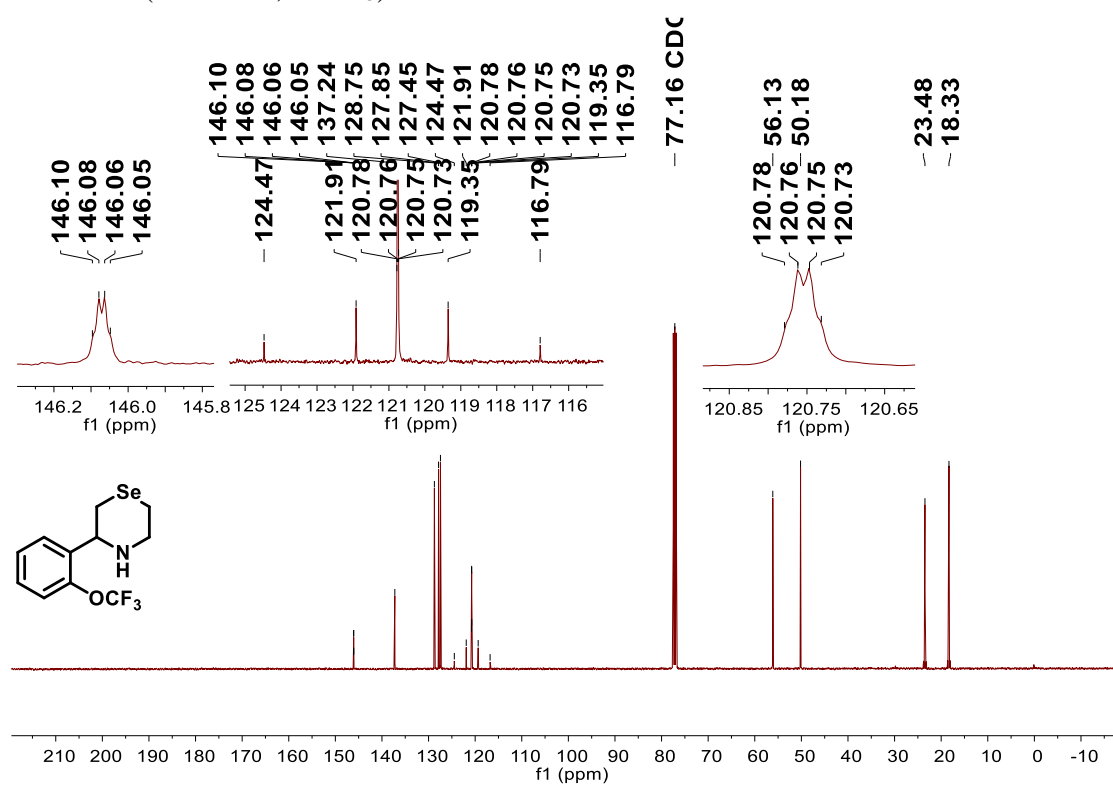



$^{19}\text{F}$  NMR (376 MHz,  $\text{CDCl}_3$ )

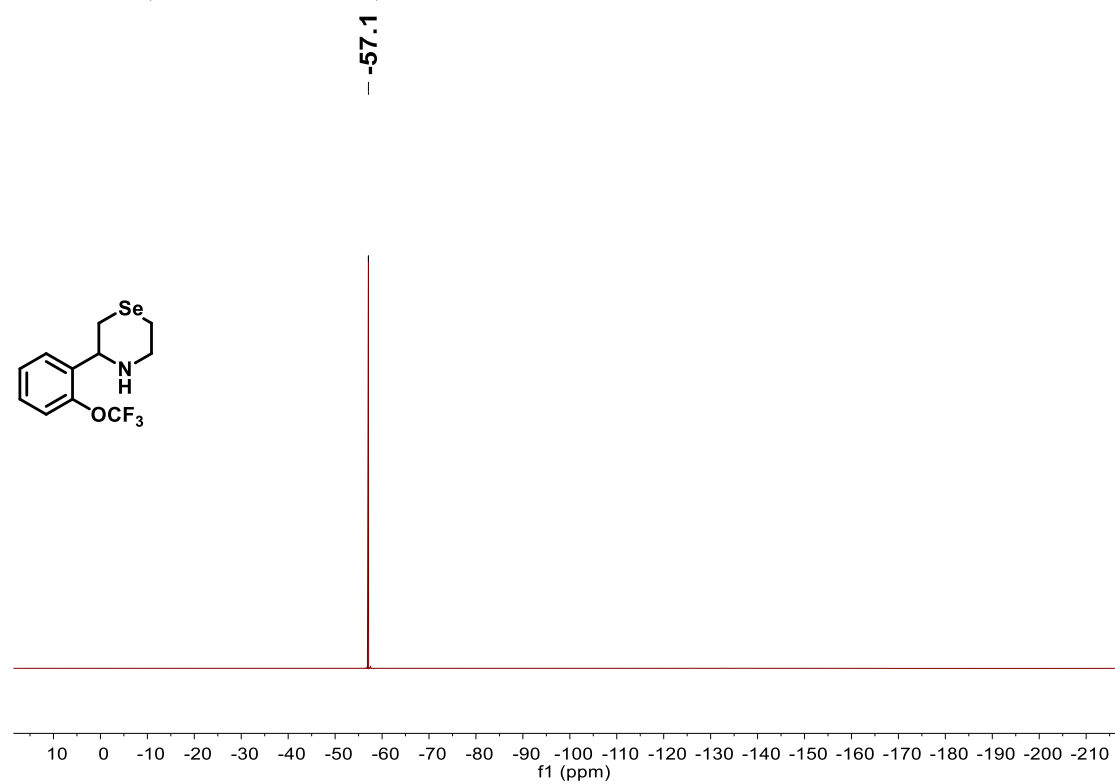



# Compound 3j

$^1\text{H}$  NMR (400 MHz,  $\text{CDCl}_3$ )

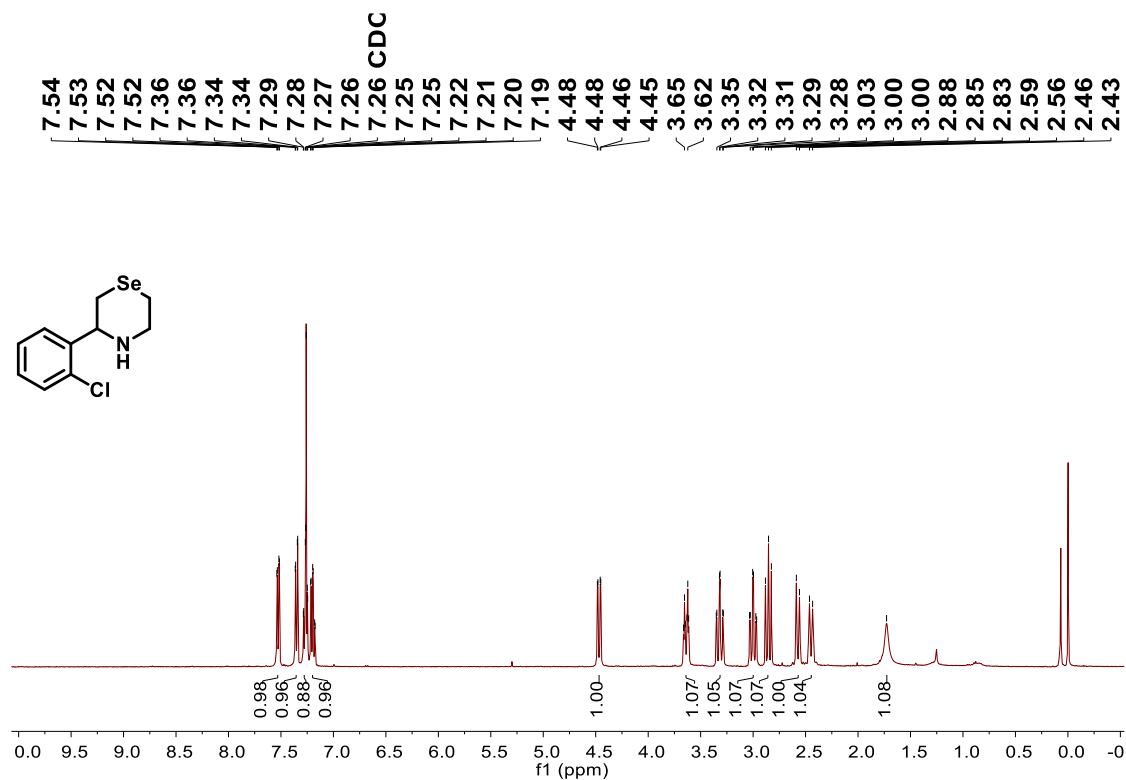

$^{13}\text{C}$  NMR (101 MHz,  $\text{CDCl}_3$ )

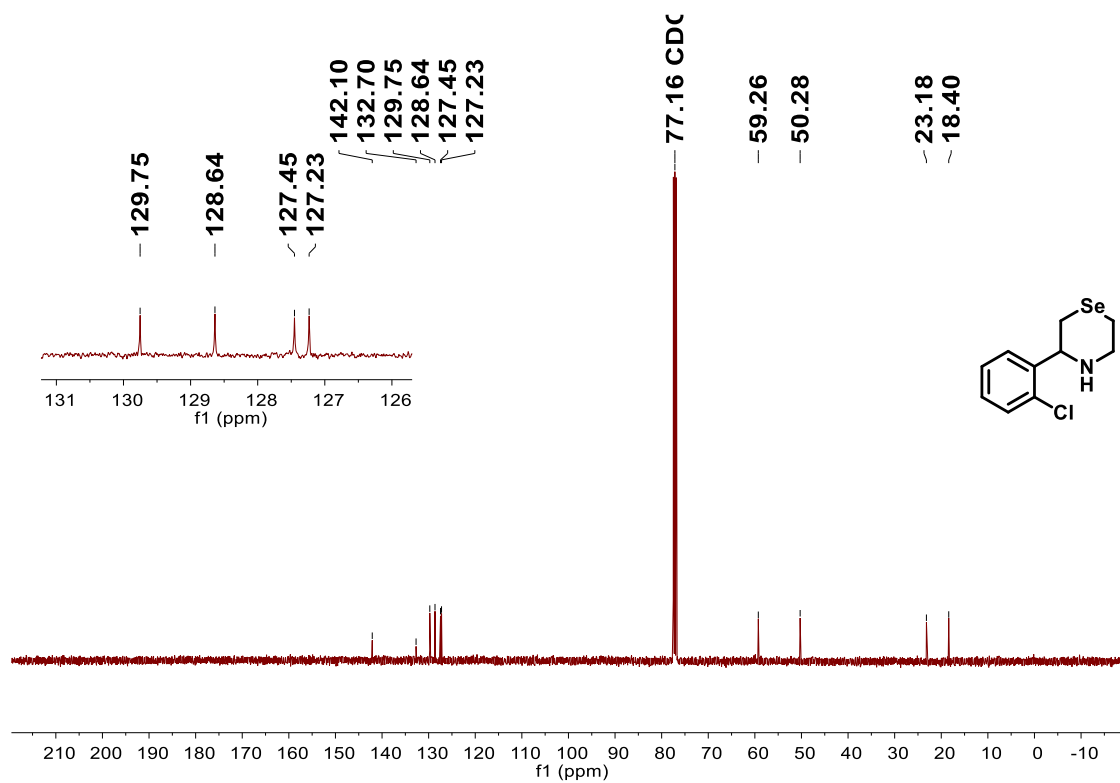



# Compound 3k

$^1\text{H}$  NMR (400 MHz,  $\text{CDCl}_3$ )

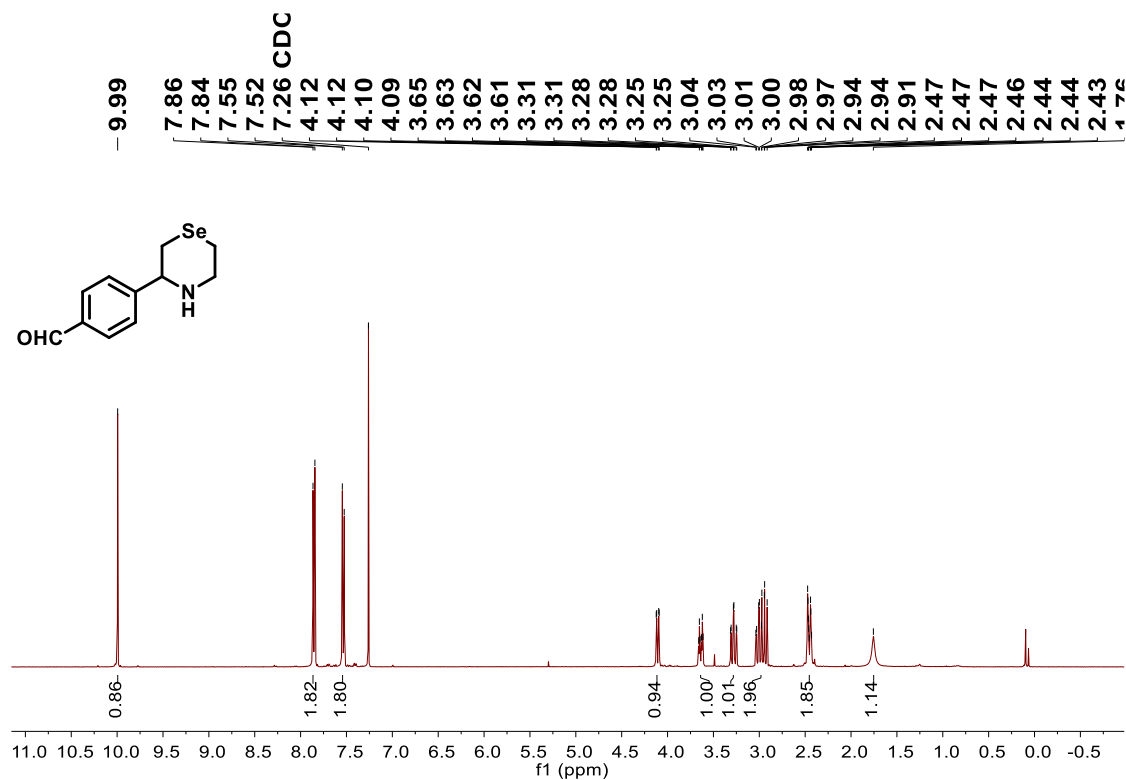

$^{13}\text{C}$  NMR (101 MHz,  $\text{CDCl}_3$ )

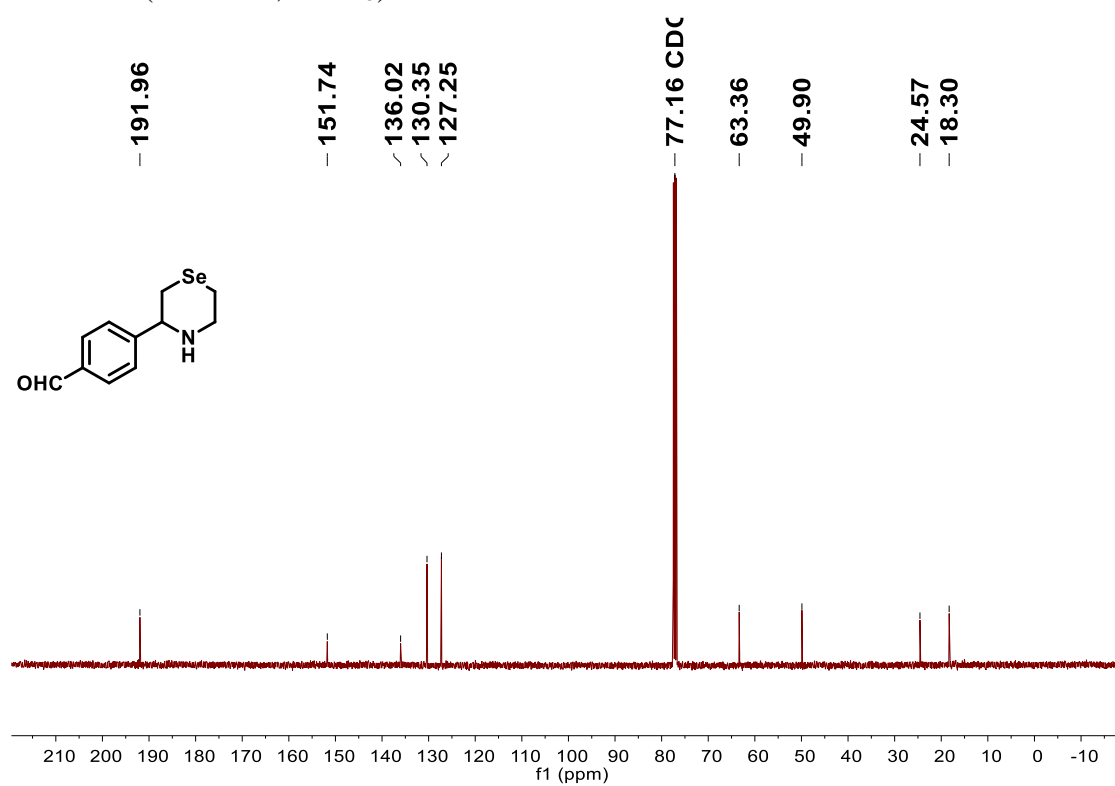



# Compound 3l

$^1\text{H}$  NMR (400 MHz,  $\text{CDCl}_3$ )

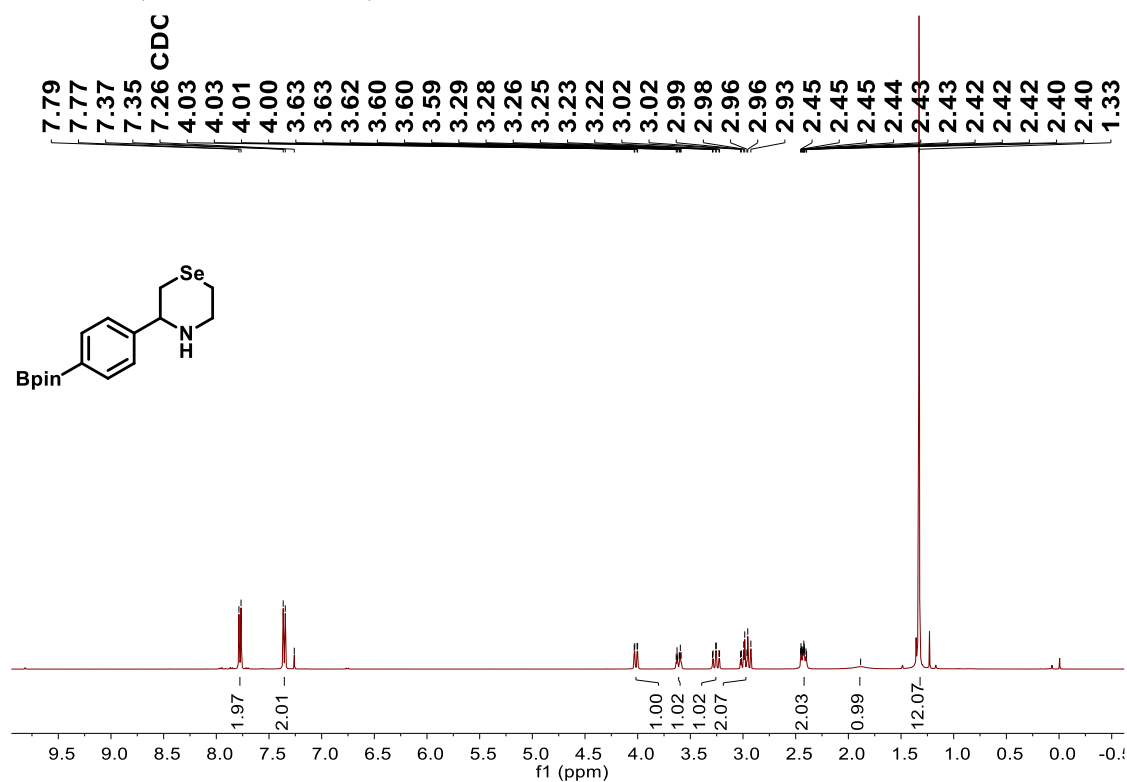

$^{13}\text{C}$  NMR (101 MHz,  $\text{CDCl}_3$ )

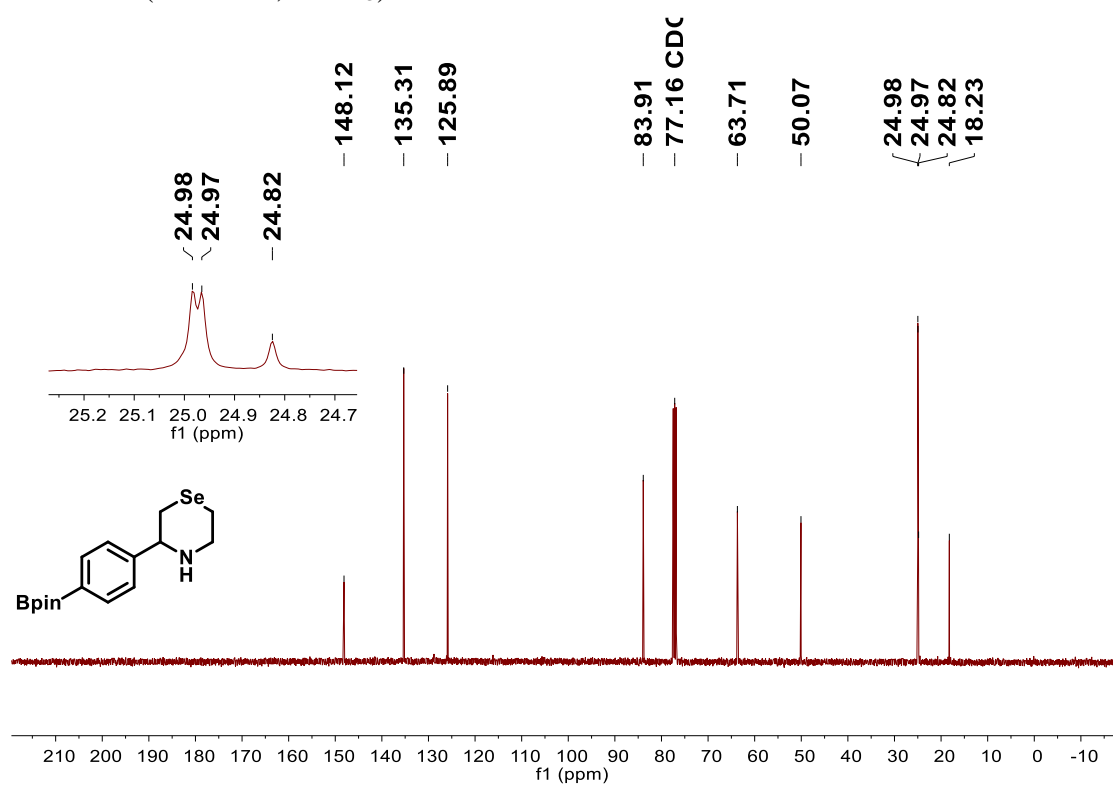



# Compound 3m

$^1\text{H}$  NMR (400 MHz,  $\text{CDCl}_3$ )

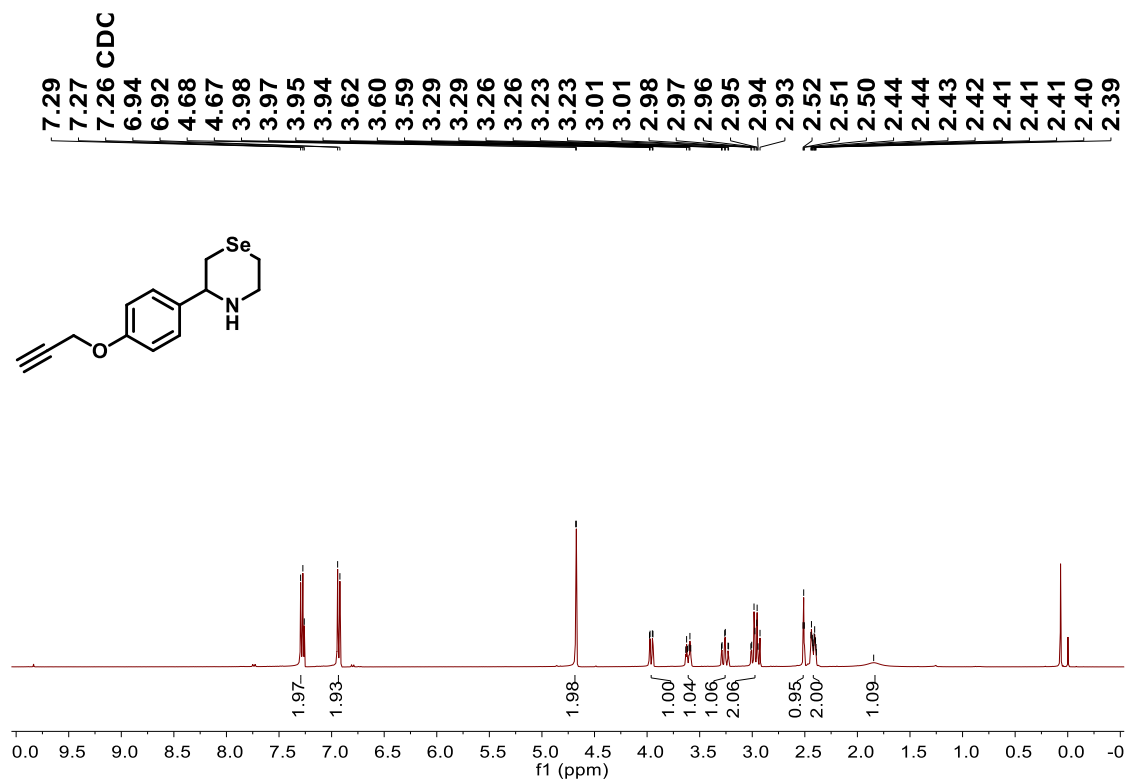

$^{13}\text{C}$  NMR (101 MHz,  $\text{CDCl}_3$ )

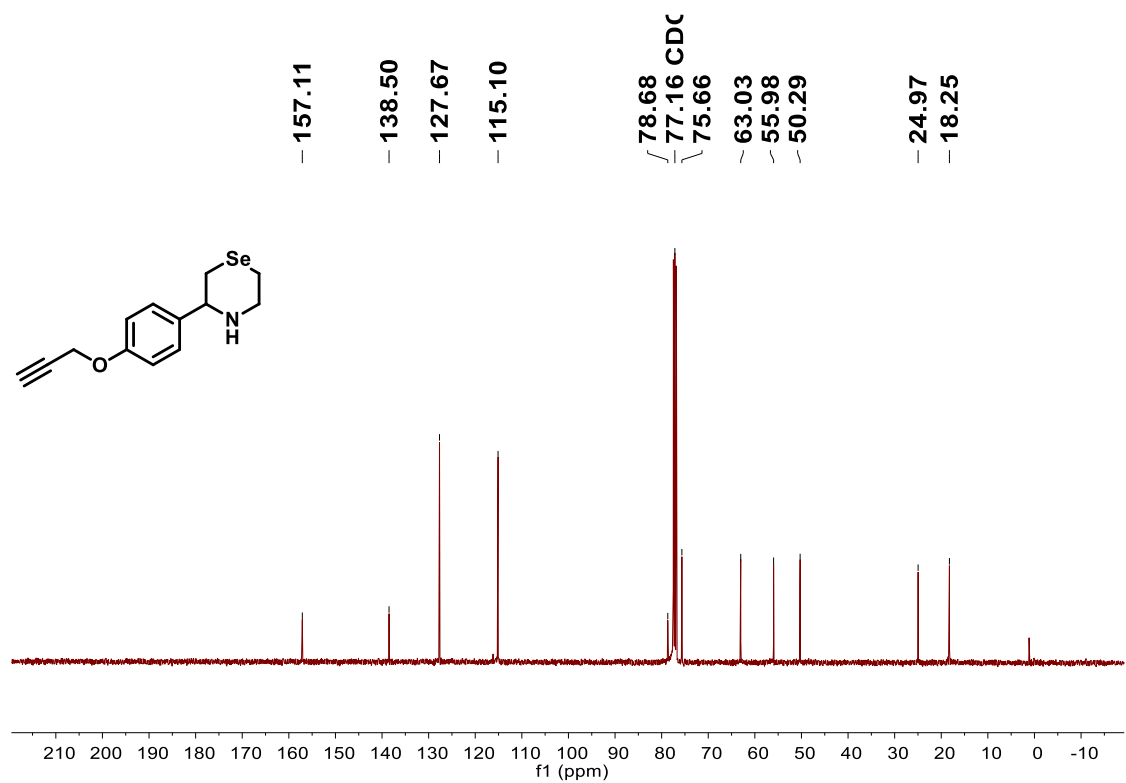



# Compound 3n

$^1\text{H}$  NMR (400 MHz,  $\text{CDCl}_3$ )

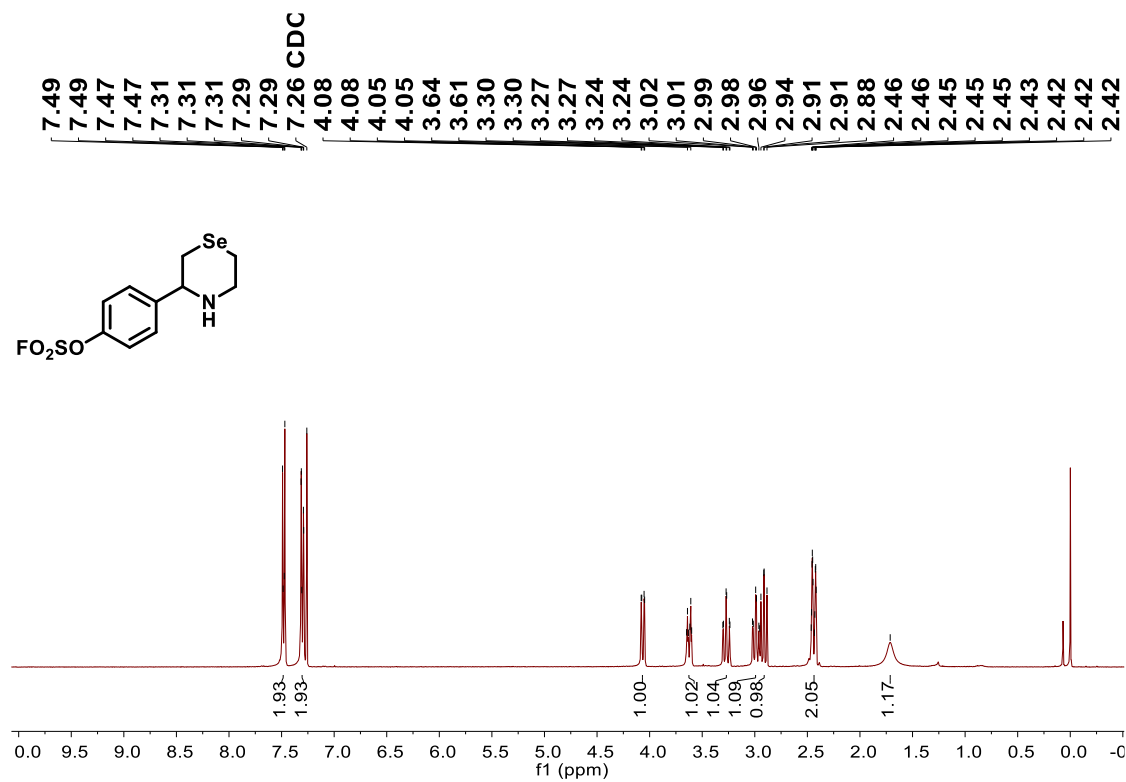

$^{13}\text{C}$  NMR (101 MHz,  $\text{CDCl}_3$ )

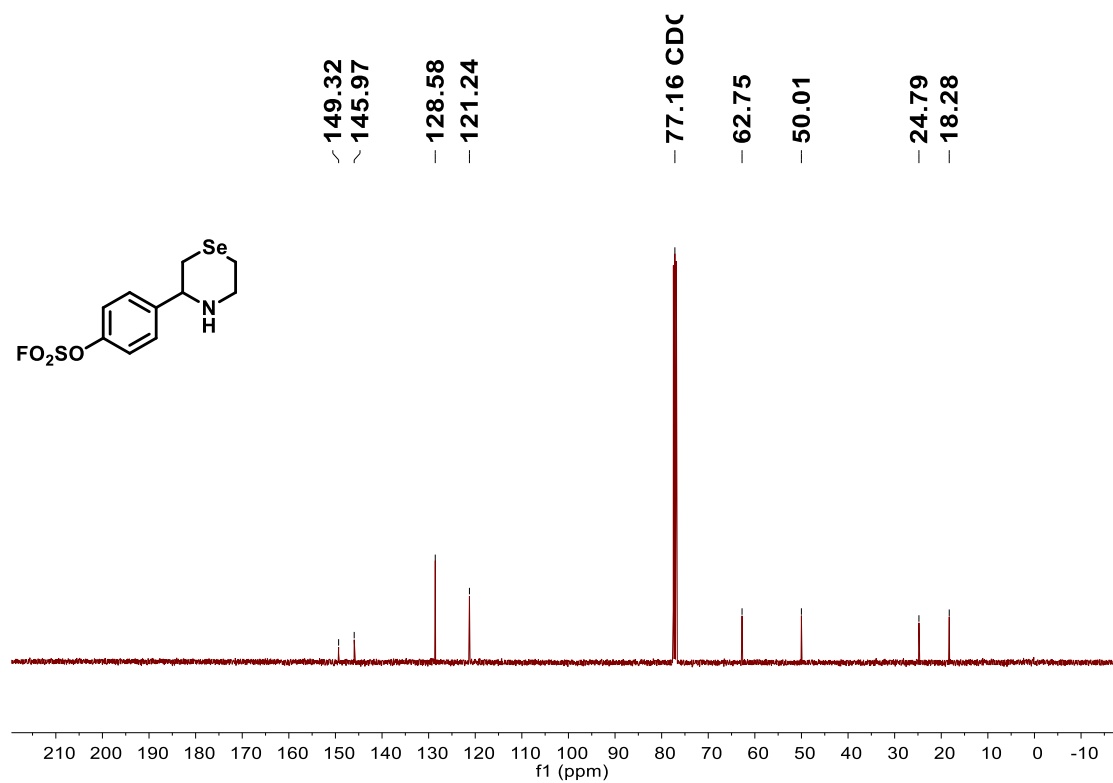



$^{19}\text{F}$  NMR (376 MHz,  $\text{CDCl}_3$ )

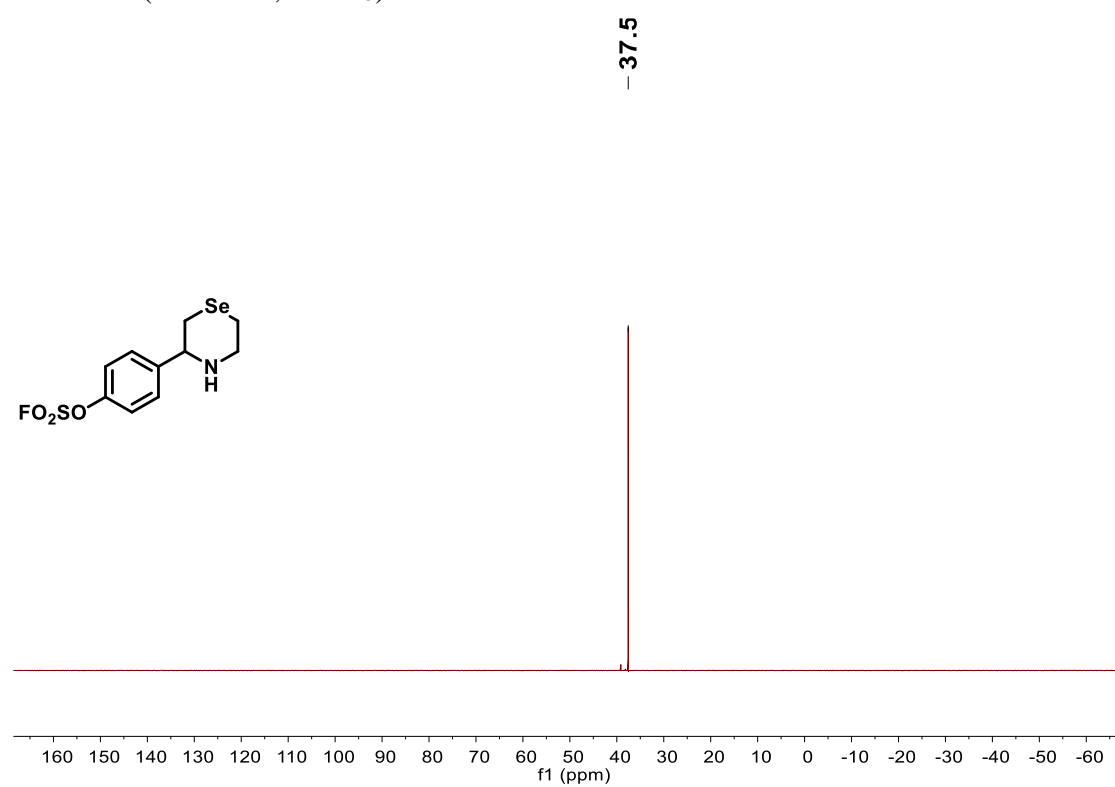



# Compound 3o

$^1\text{H}$  NMR (400 MHz,  $\text{CDCl}_3$ )

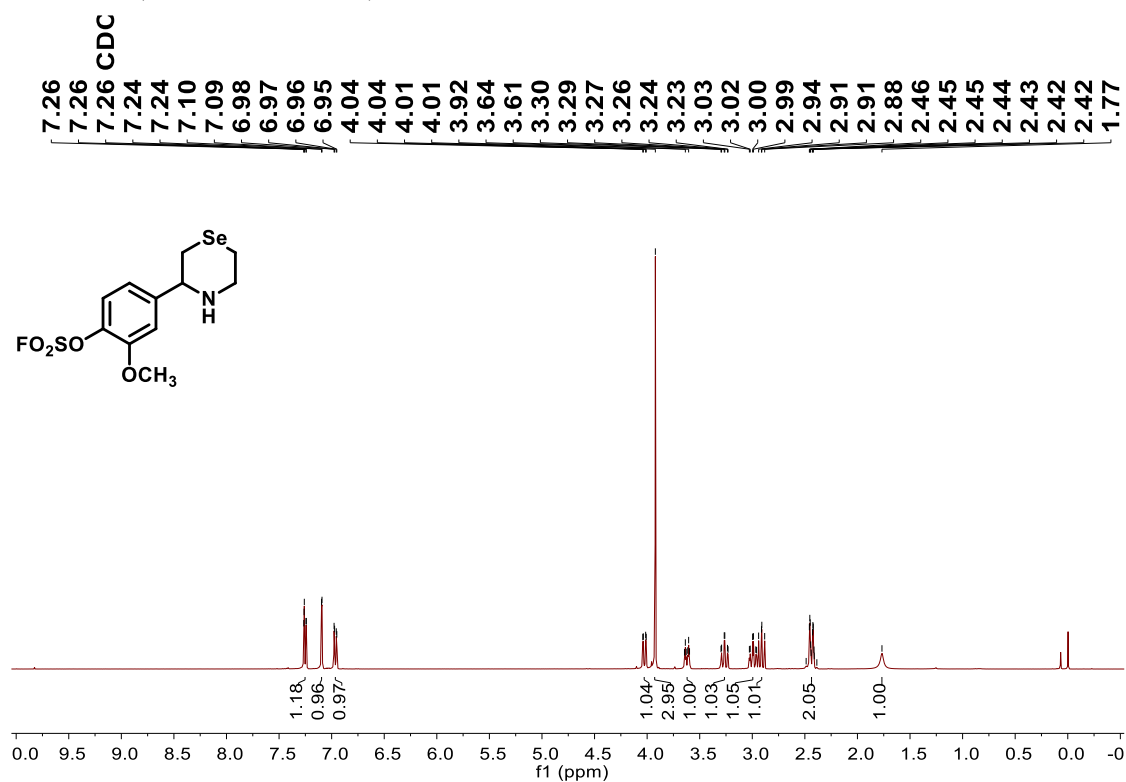

$^{13}\text{C}$  NMR (101 MHz,  $\text{CDCl}_3$ )

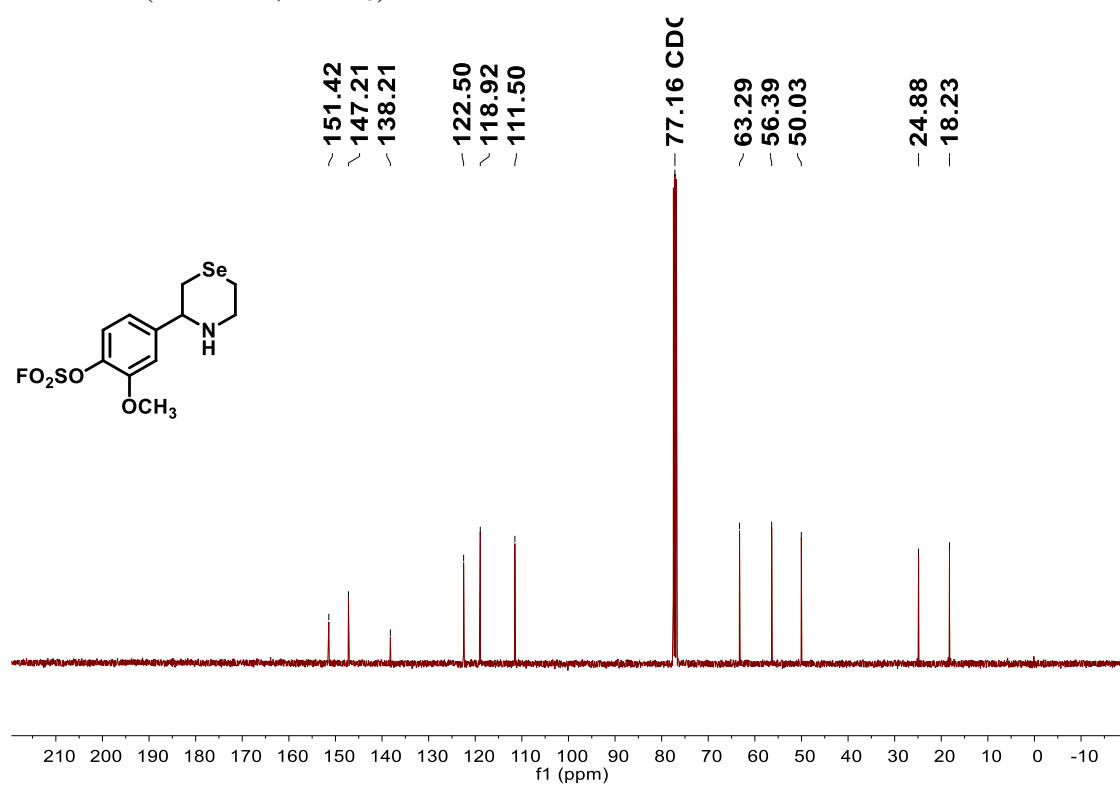



$^{19}\text{F}$  NMR (376 MHz,  $\text{CDCl}_3$ )

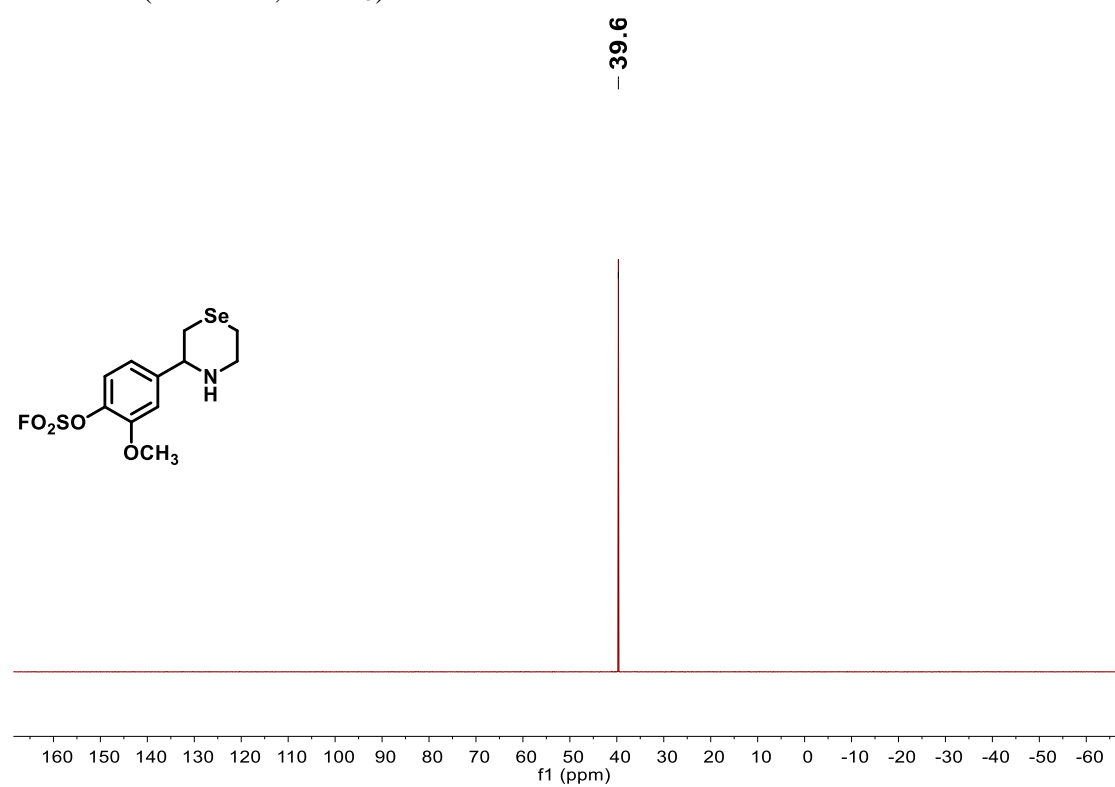



# Compound 3p

$^1\text{H}$  NMR (400 MHz,  $\text{CDCl}_3$ )

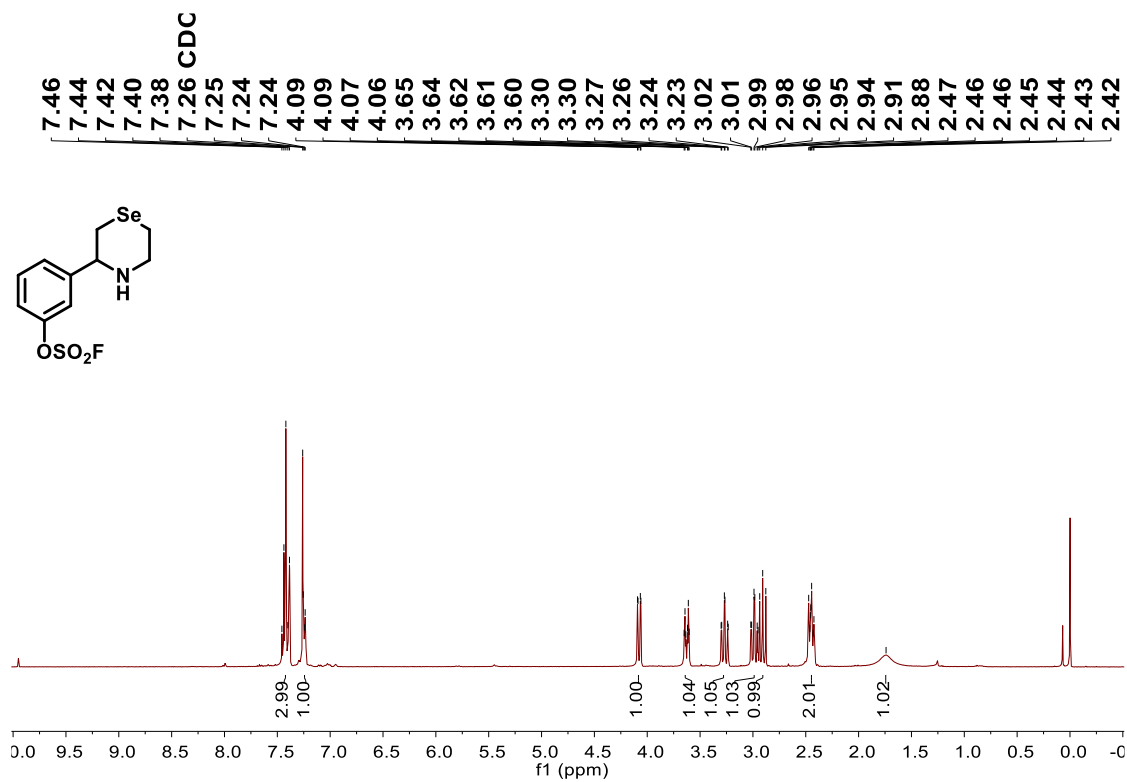

$^{13}\text{C}$  NMR (101 MHz,  $\text{CDCl}_3$ )

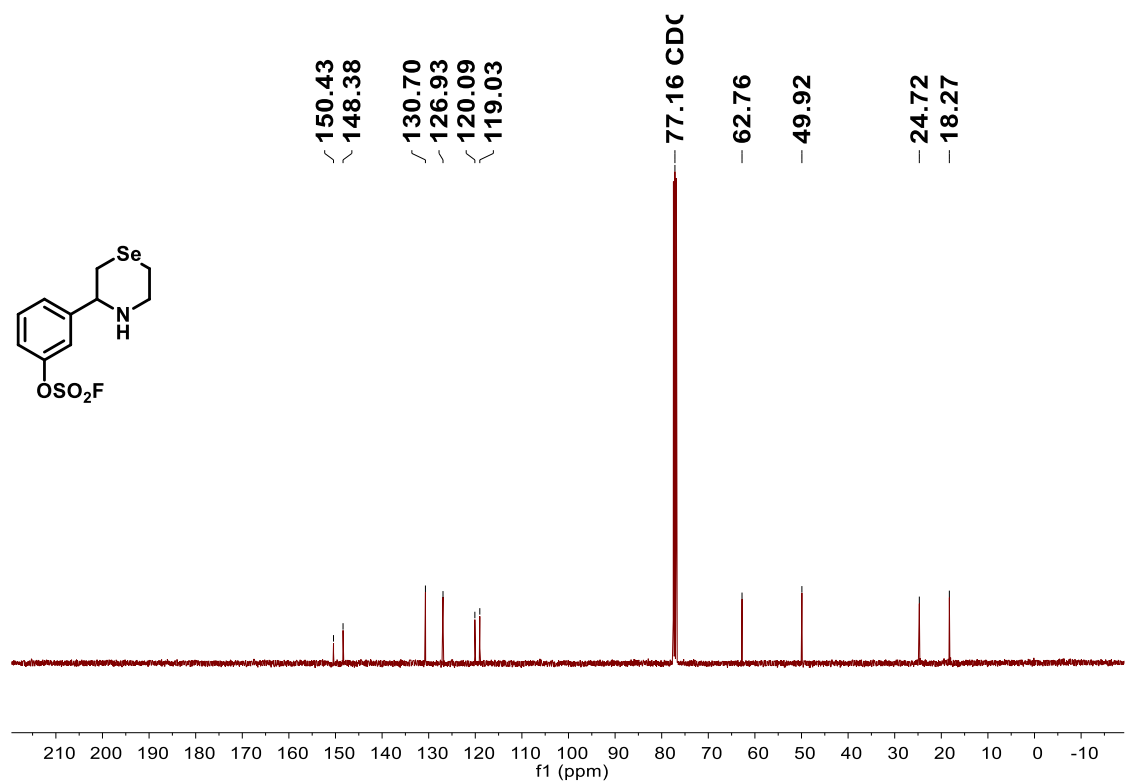



$^{19}\text{F}$  NMR (376 MHz,  $\text{CDCl}_3$ )

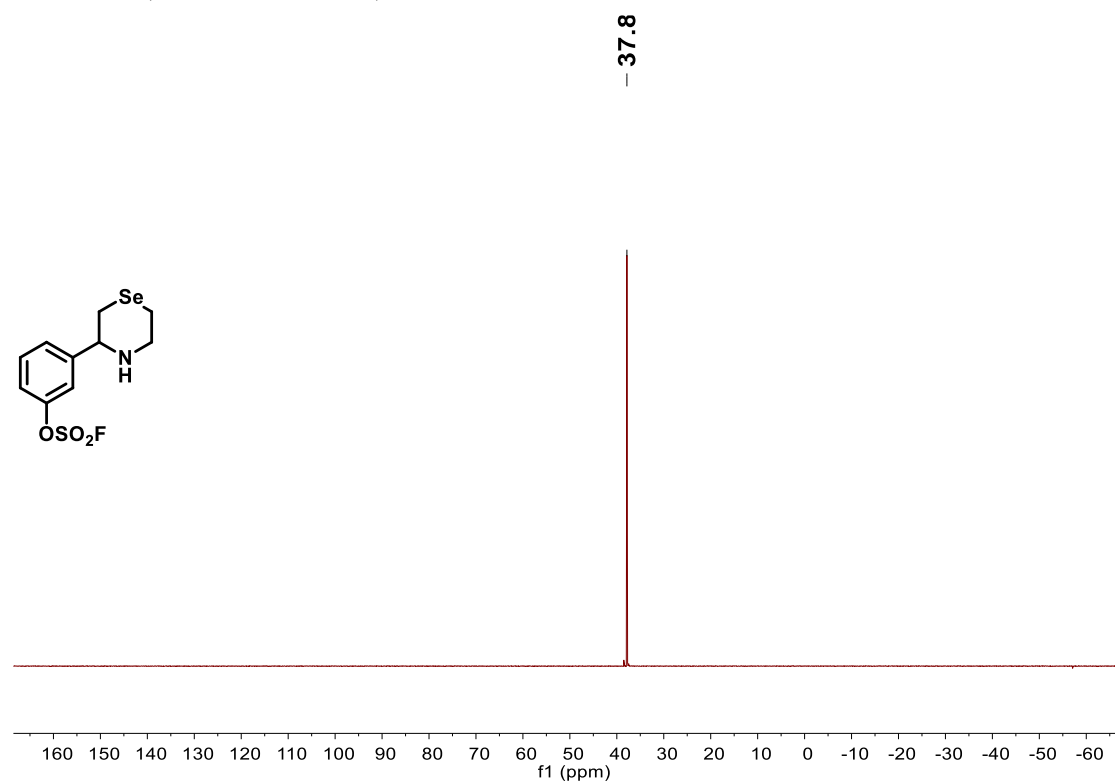



# Compound 3q

$^1\text{H}$  NMR (400 MHz,  $\text{CDCl}_3$ )

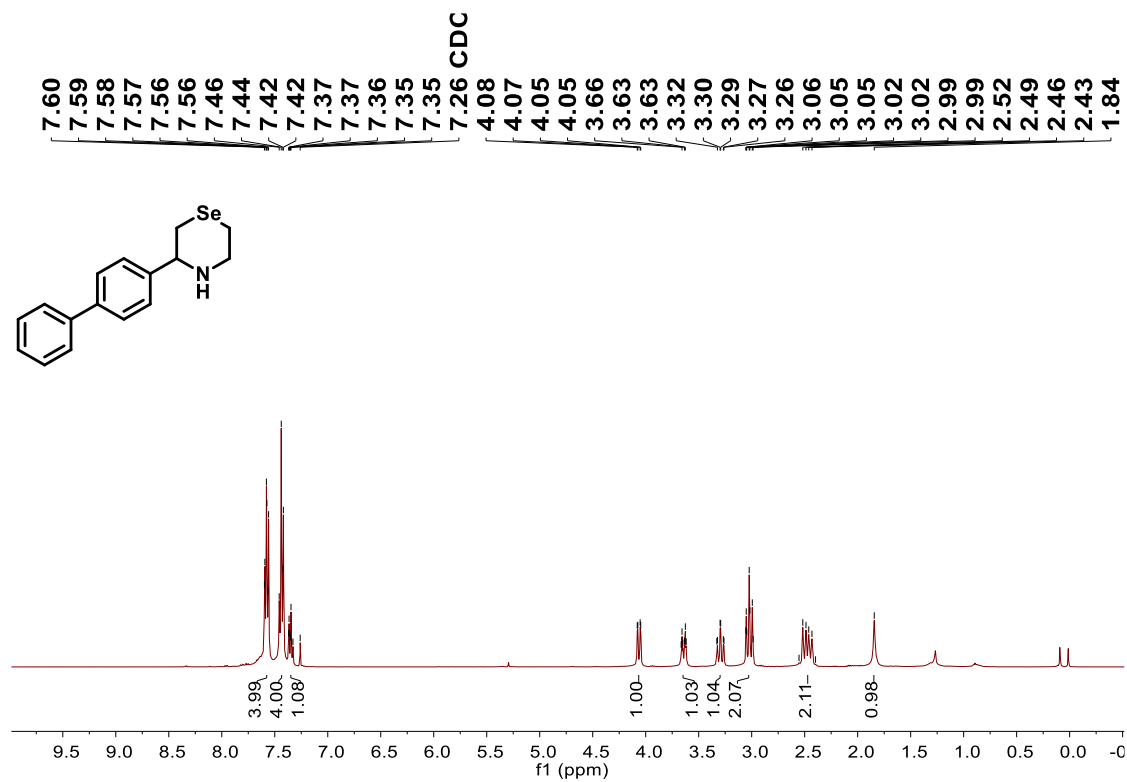

$^{13}\text{C}$  NMR (101 MHz,  $\text{CDCl}_3$ )

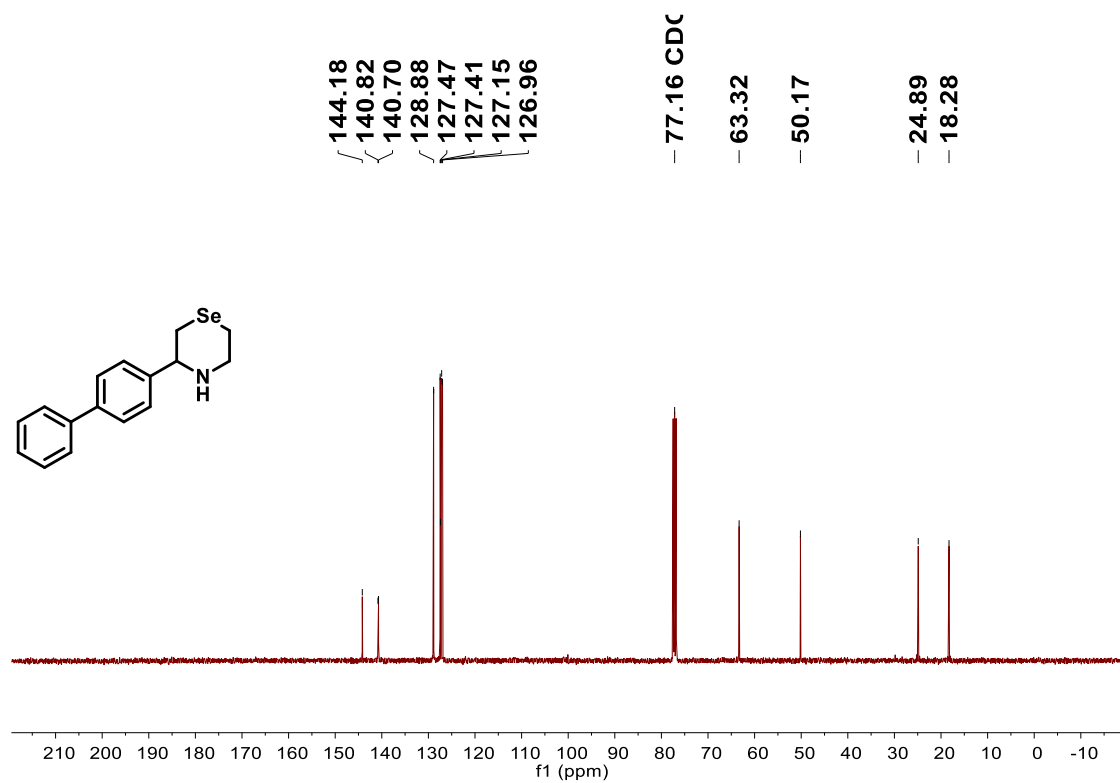



# Compound 3s

$^1\text{H}$  NMR (400 MHz,  $\text{CDCl}_3$ )

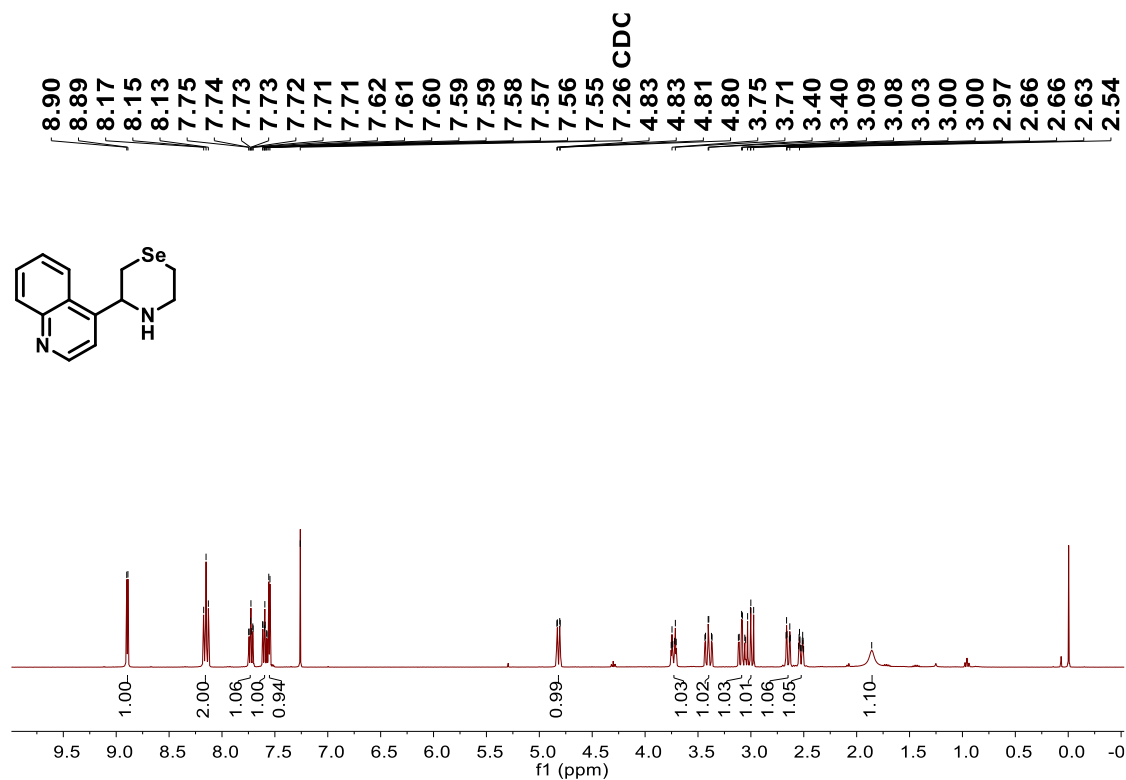

$^{13}\text{C}$  NMR (101 MHz,  $\text{CDCl}_3$ )

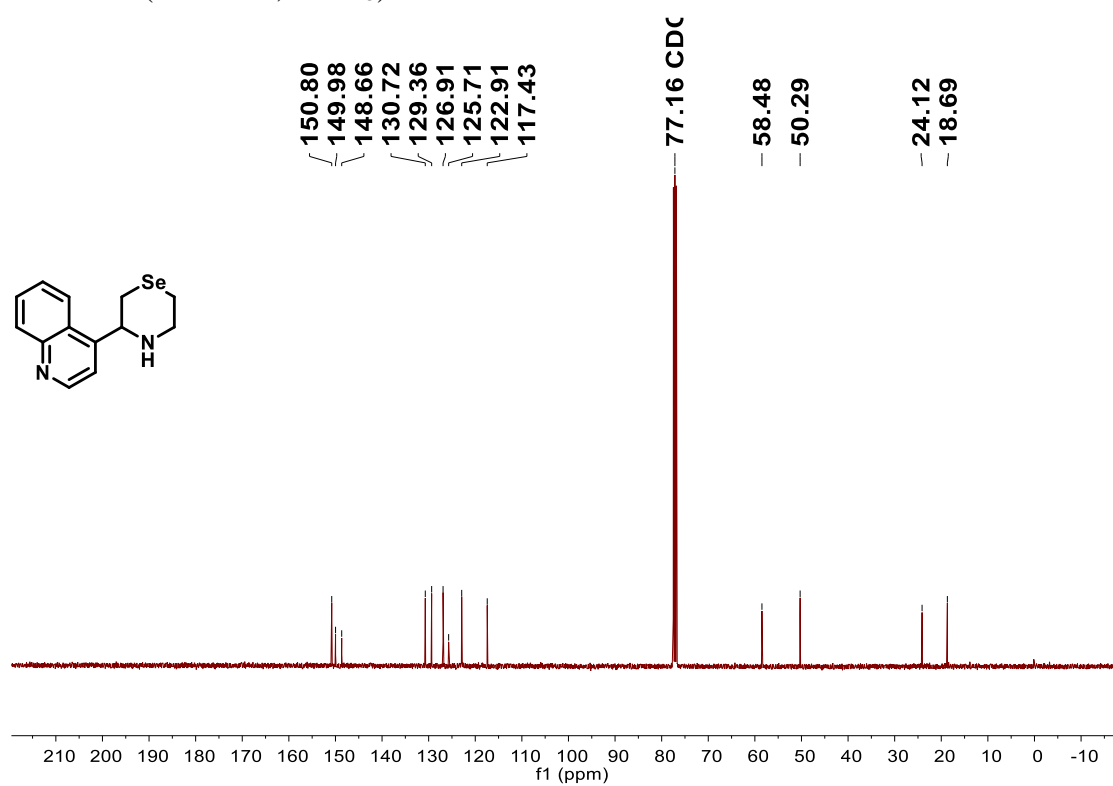



# Compound 3t

$^1\text{H}$  NMR (400 MHz,  $\text{CDCl}_3$ )

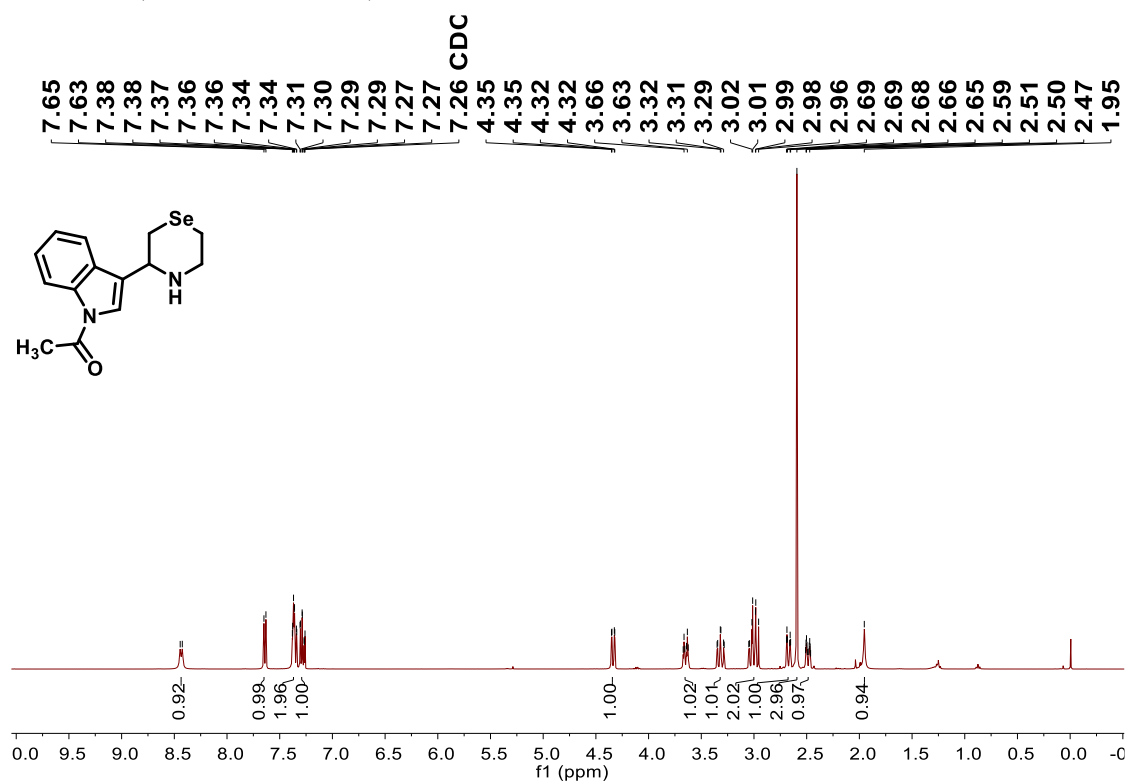

$^{13}\text{C}$  NMR (101 MHz,  $\text{CDCl}_3$ )

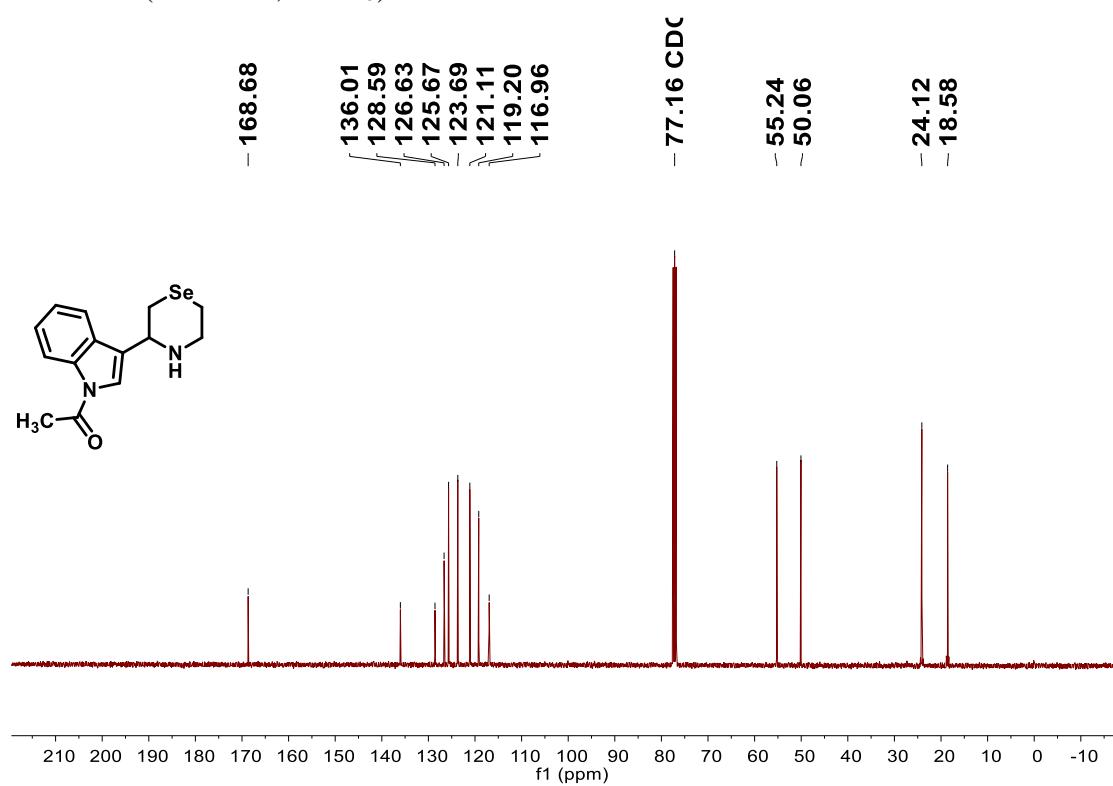



# Compound 3u

$^1\text{H}$  NMR (400 MHz,  $\text{CDCl}_3$ )

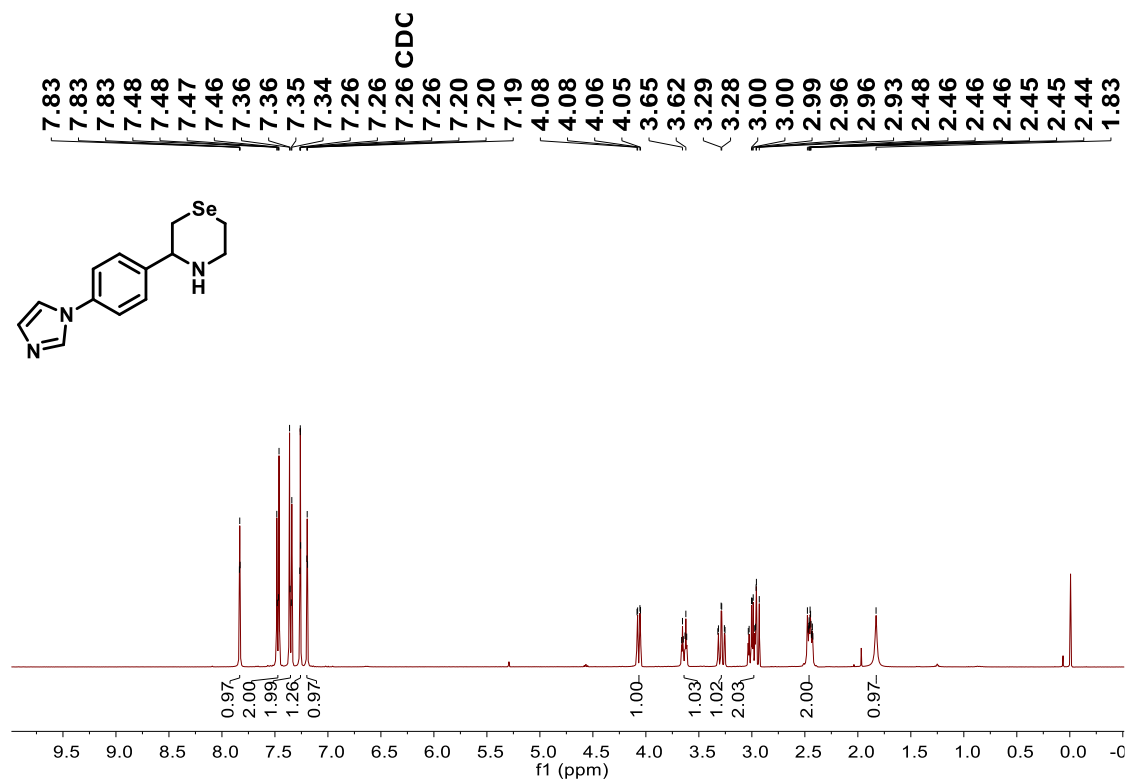

$^{13}\text{C}$  NMR (101 MHz,  $\text{CDCl}_3$ )

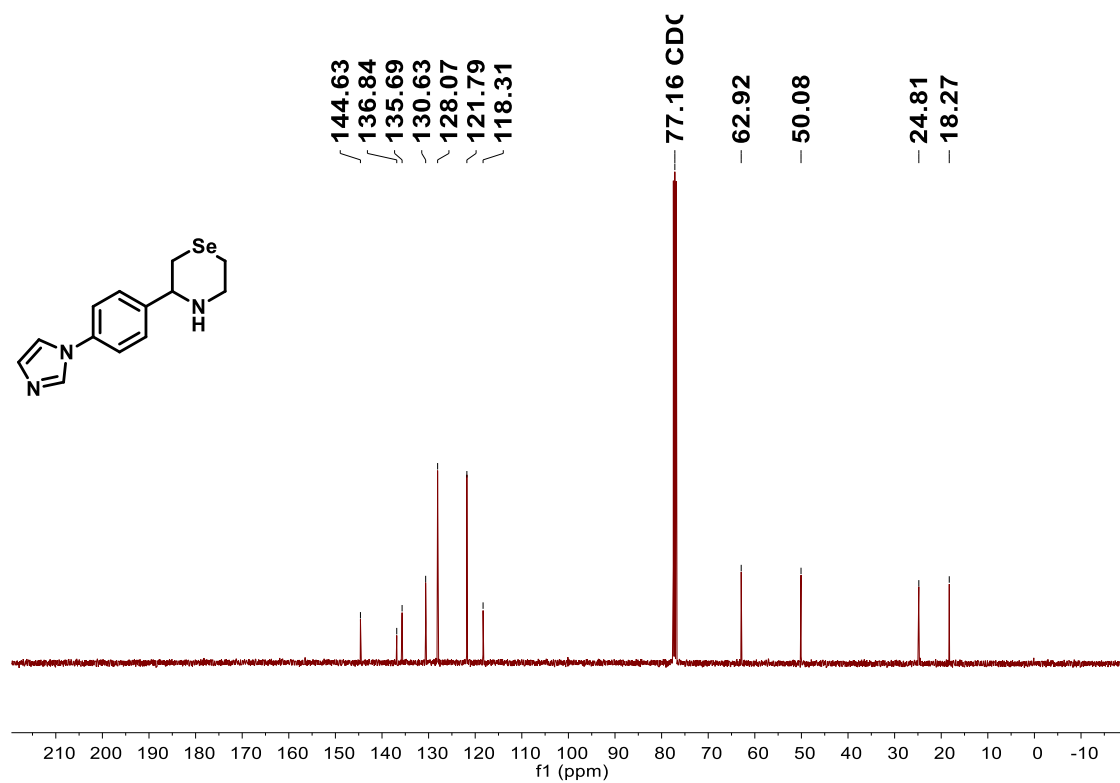



# Compound 3v

$^1\text{H}$  NMR (400 MHz,  $\text{CDCl}_3$ )

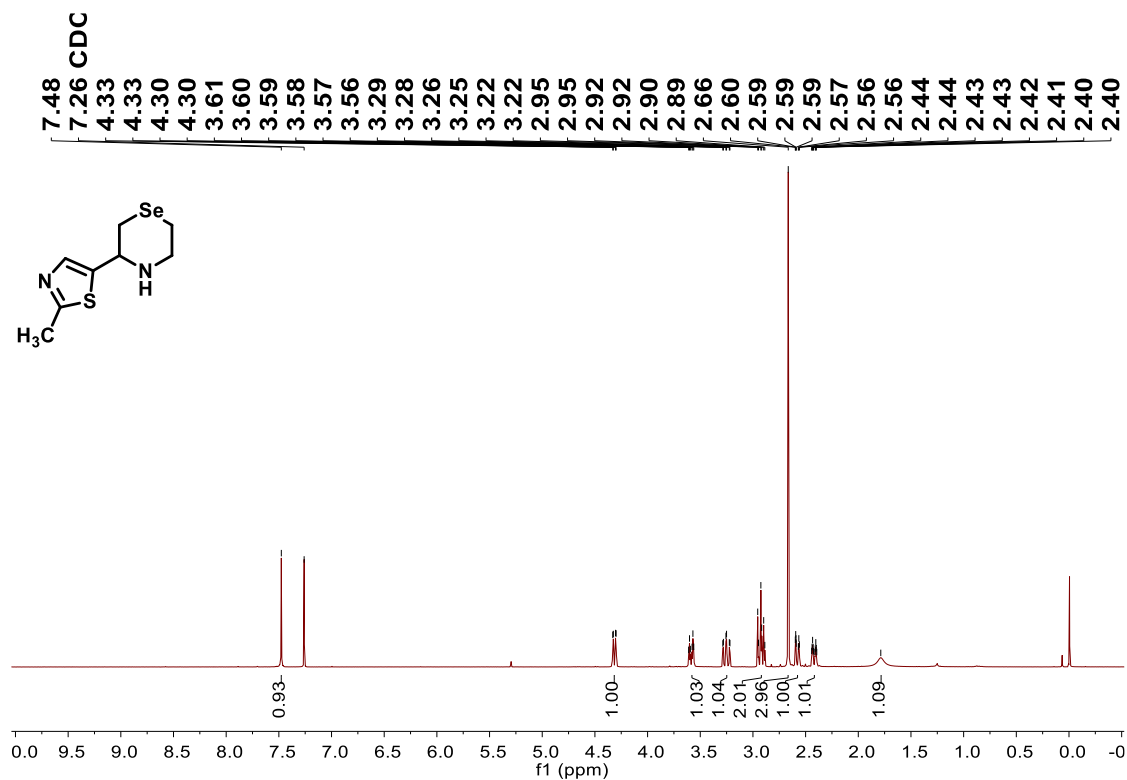

$^{13}\text{C}$  NMR (101 MHz,  $\text{CDCl}_3$ )

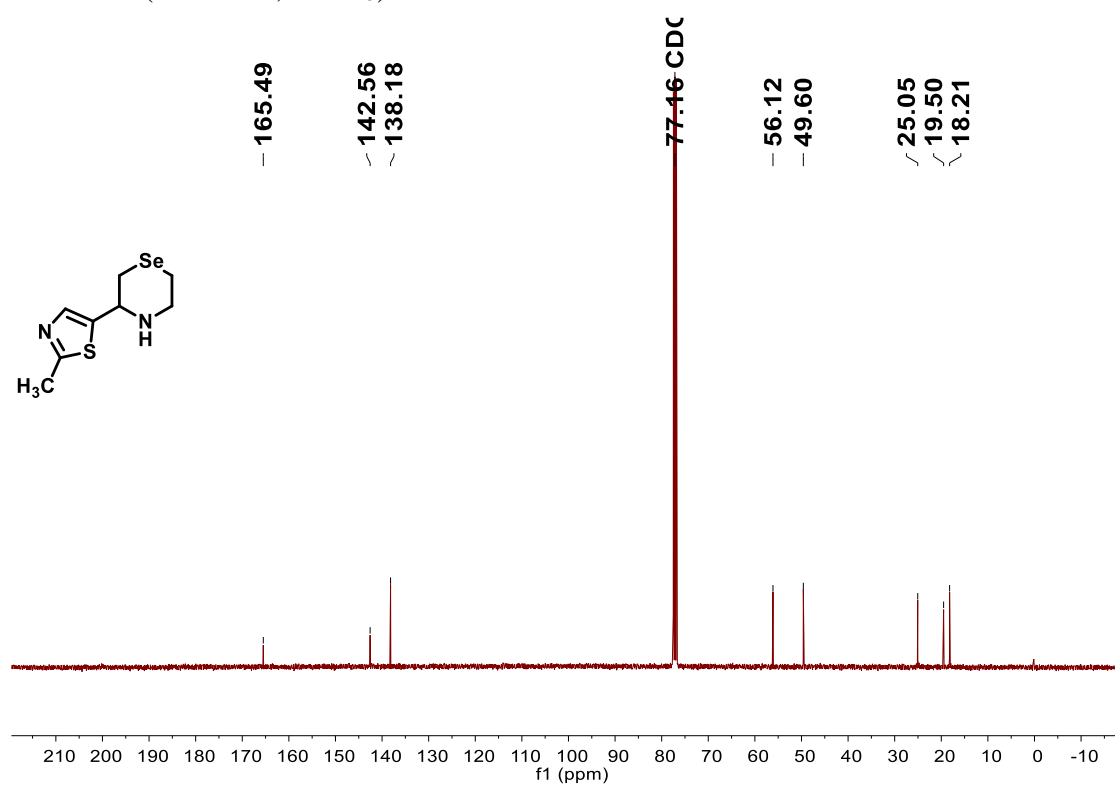



# Compound 3w

$^1\text{H}$  NMR (400 MHz,  $\text{CDCl}_3$ )

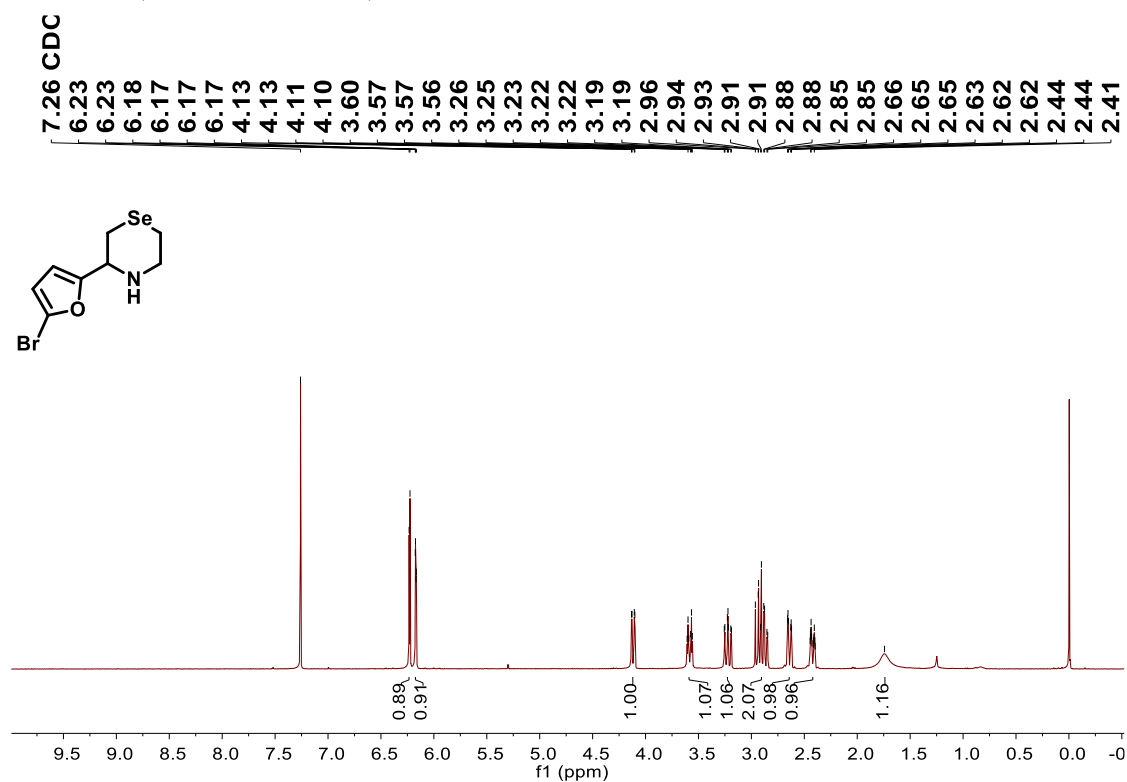

$^{13}\text{C}$  NMR (101 MHz,  $\text{CDCl}_3$ )

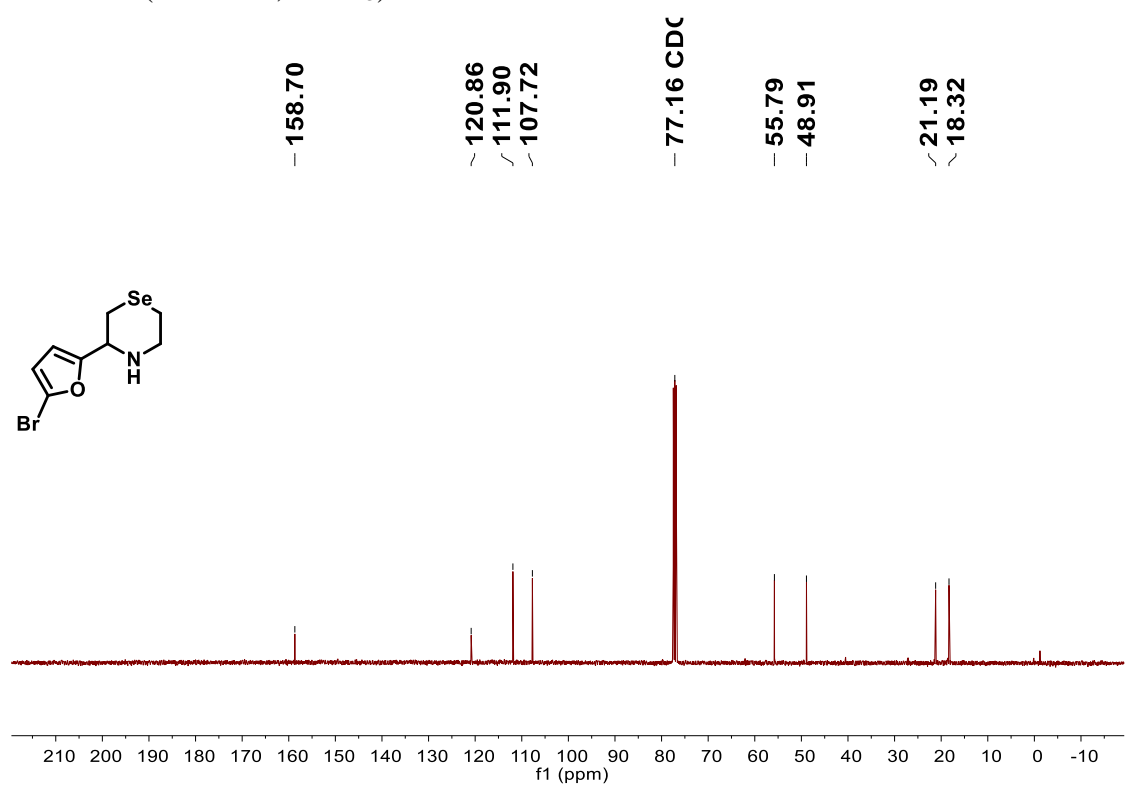



# Compound 3y

$^1\text{H}$  NMR (400 MHz,  $\text{CDCl}_3$ )

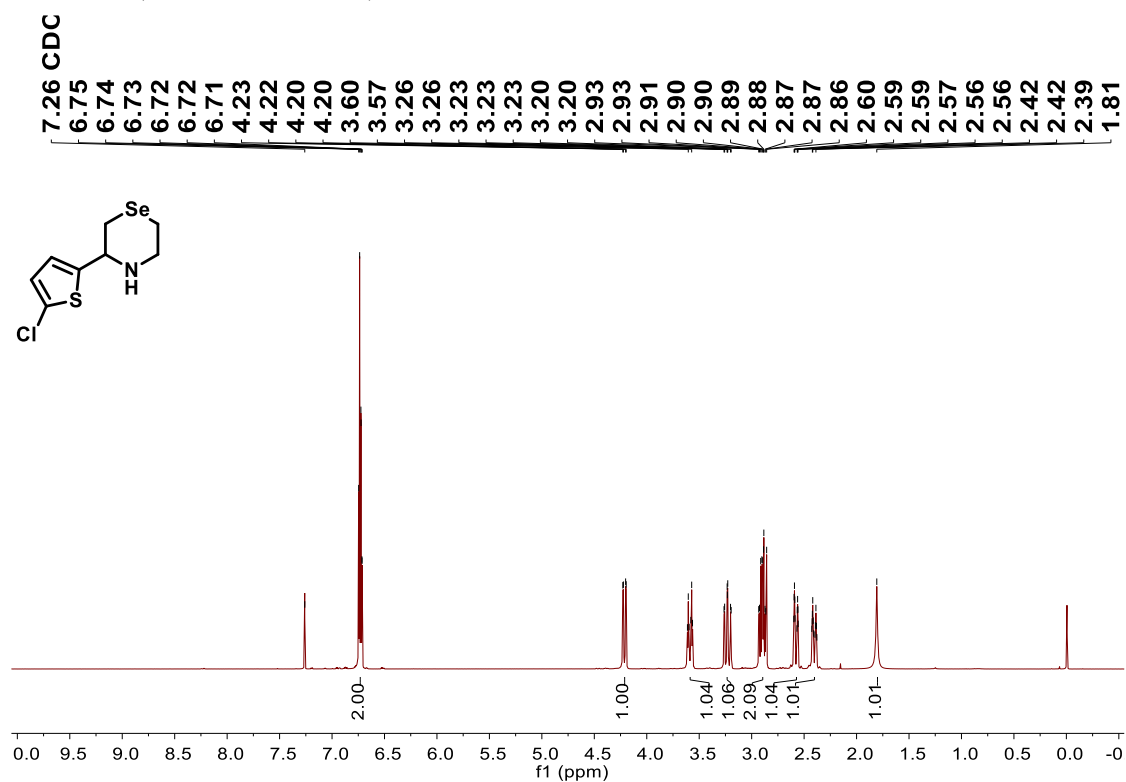

$^{13}\text{C}$  NMR (101 MHz,  $\text{CDCl}_3$ )

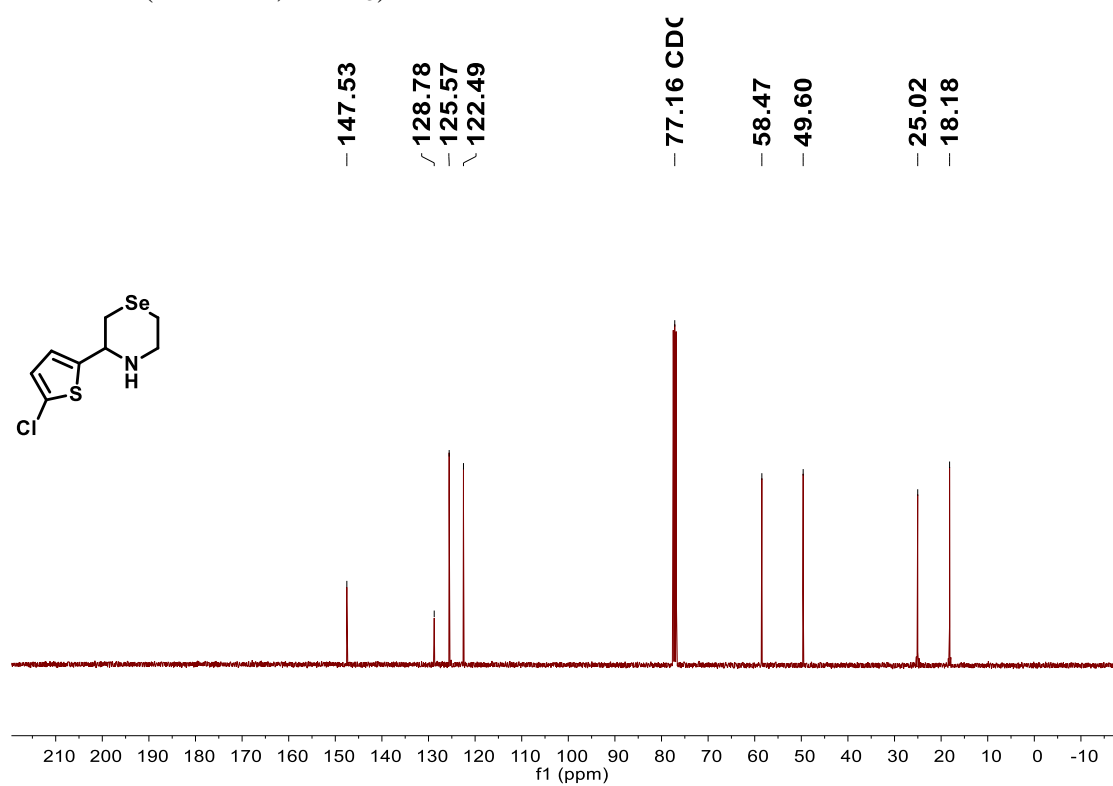



# Compound 3z

$^1\text{H}$  NMR (400 MHz,  $\text{CDCl}_3$ )

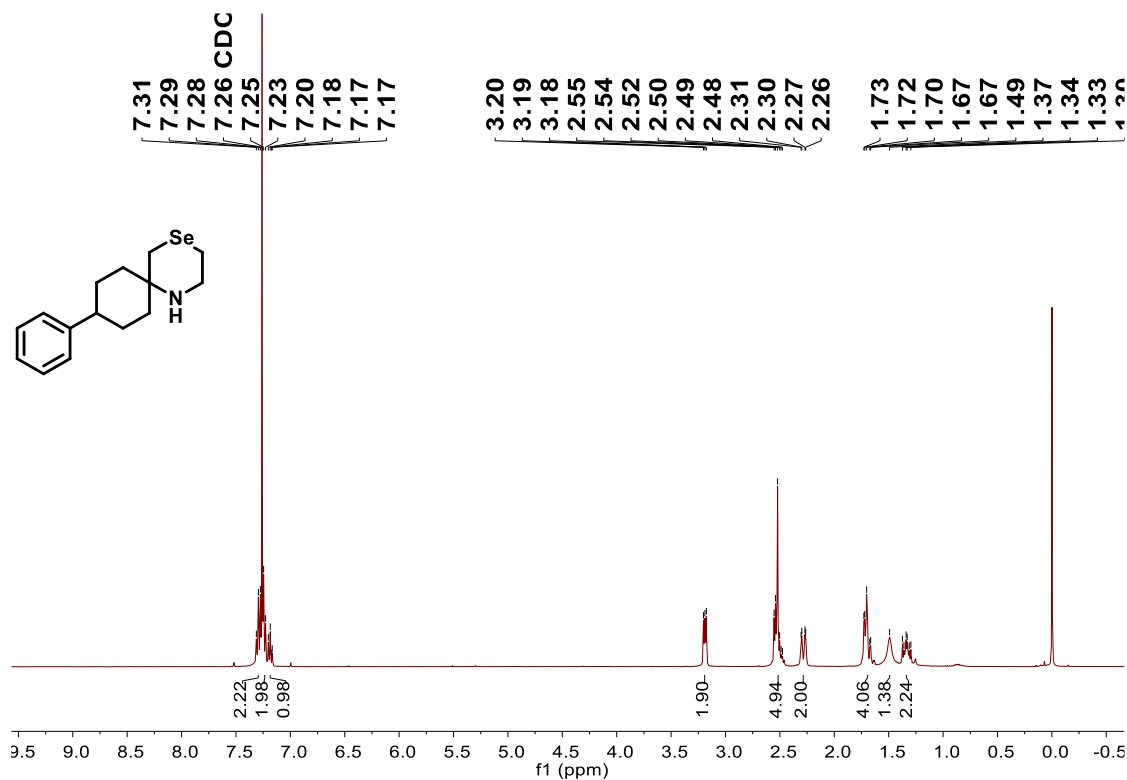

$^{13}\text{C}$  NMR (101 MHz,  $\text{CDCl}_3$ )

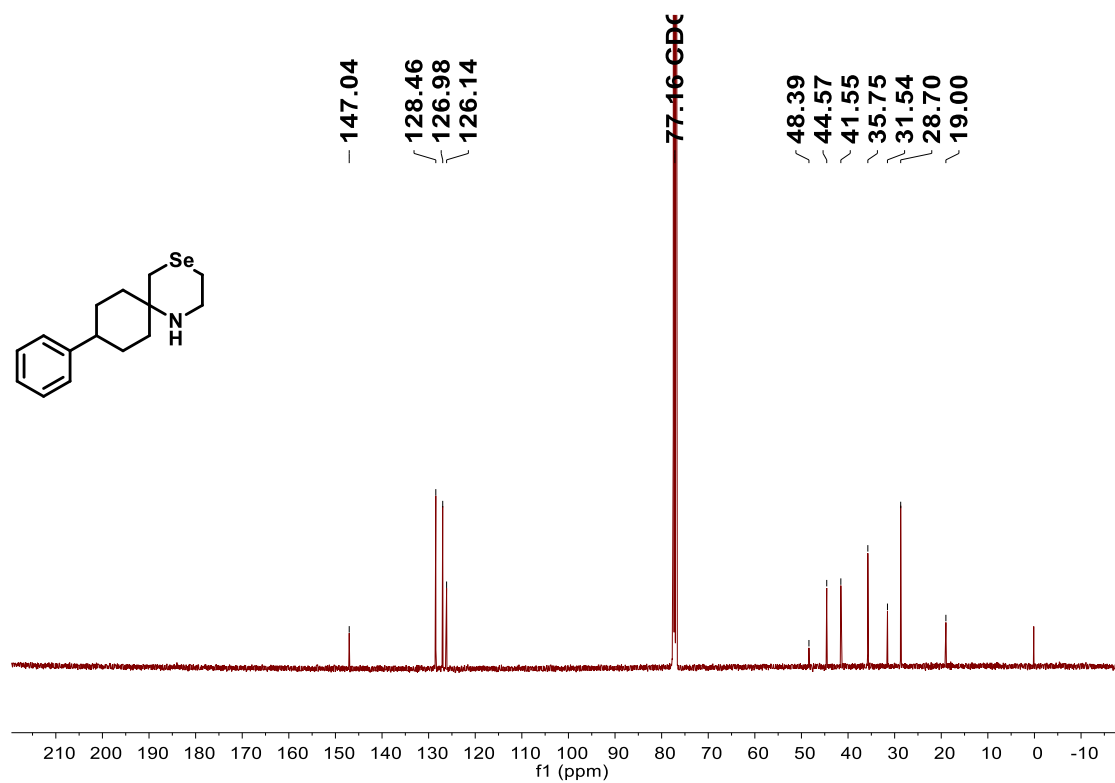



# Compound 4a

$^1\text{H}$  NMR (400 MHz,  $\text{CDCl}_3$ )

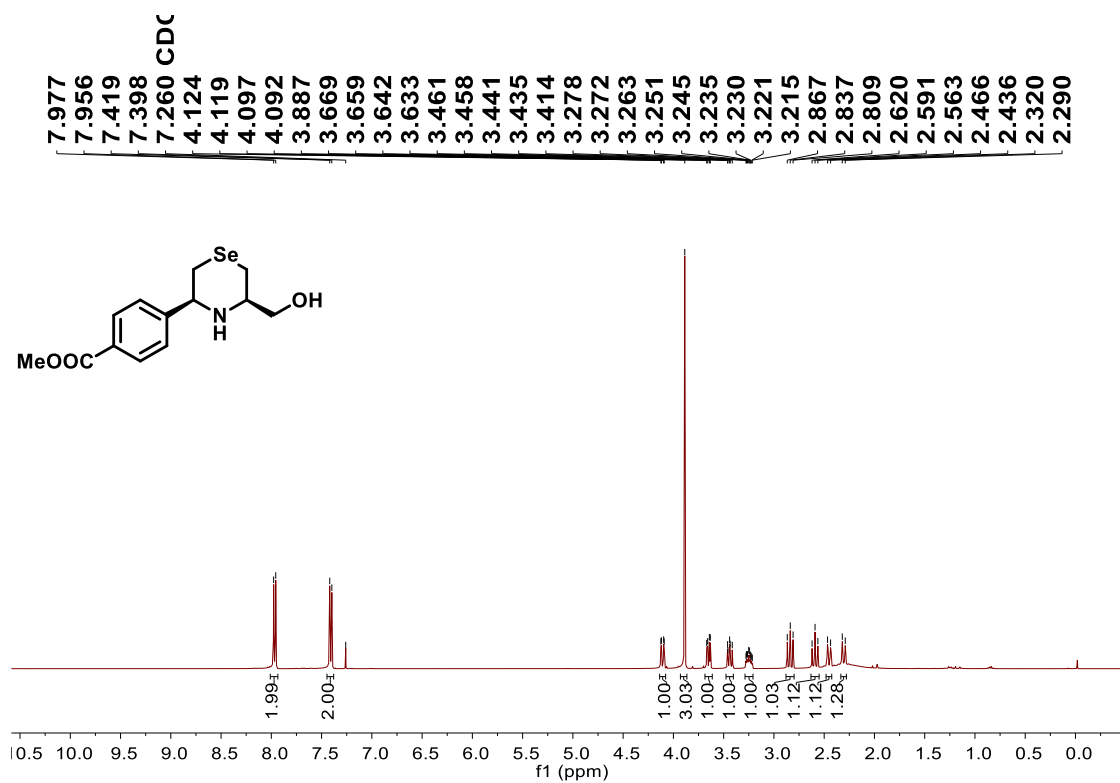

$^{13}\text{C}$  NMR (101 MHz,  $\text{CDCl}_3$ )

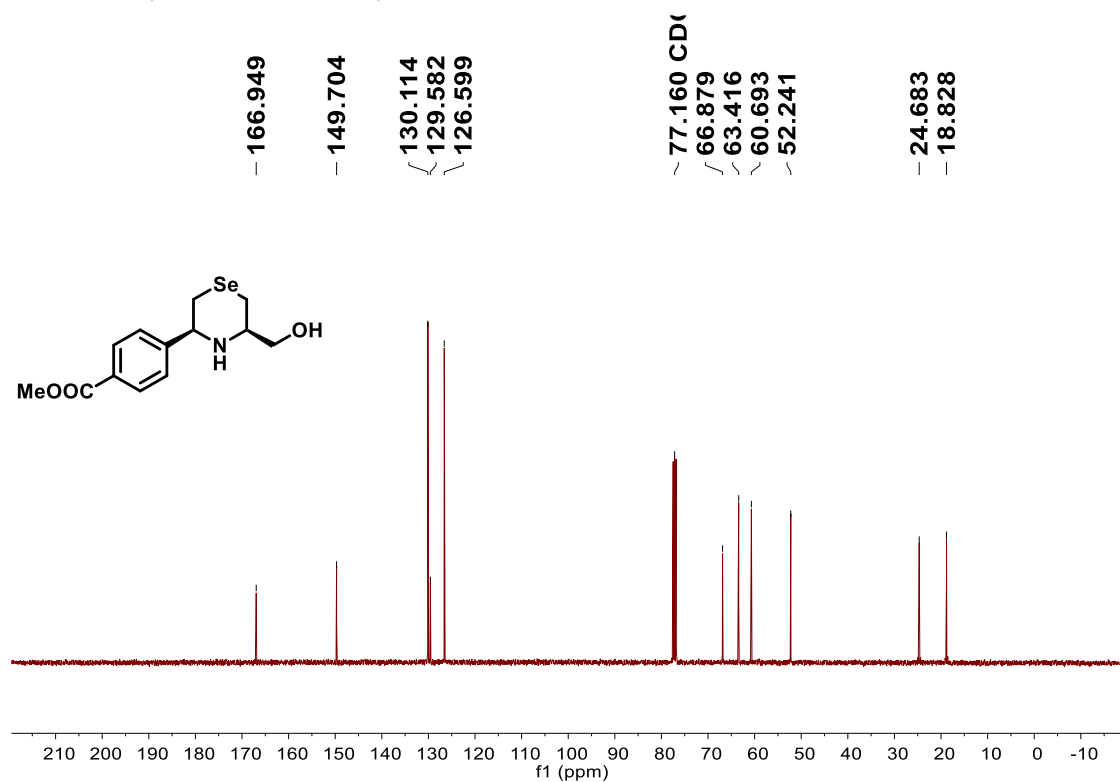



# NOESY

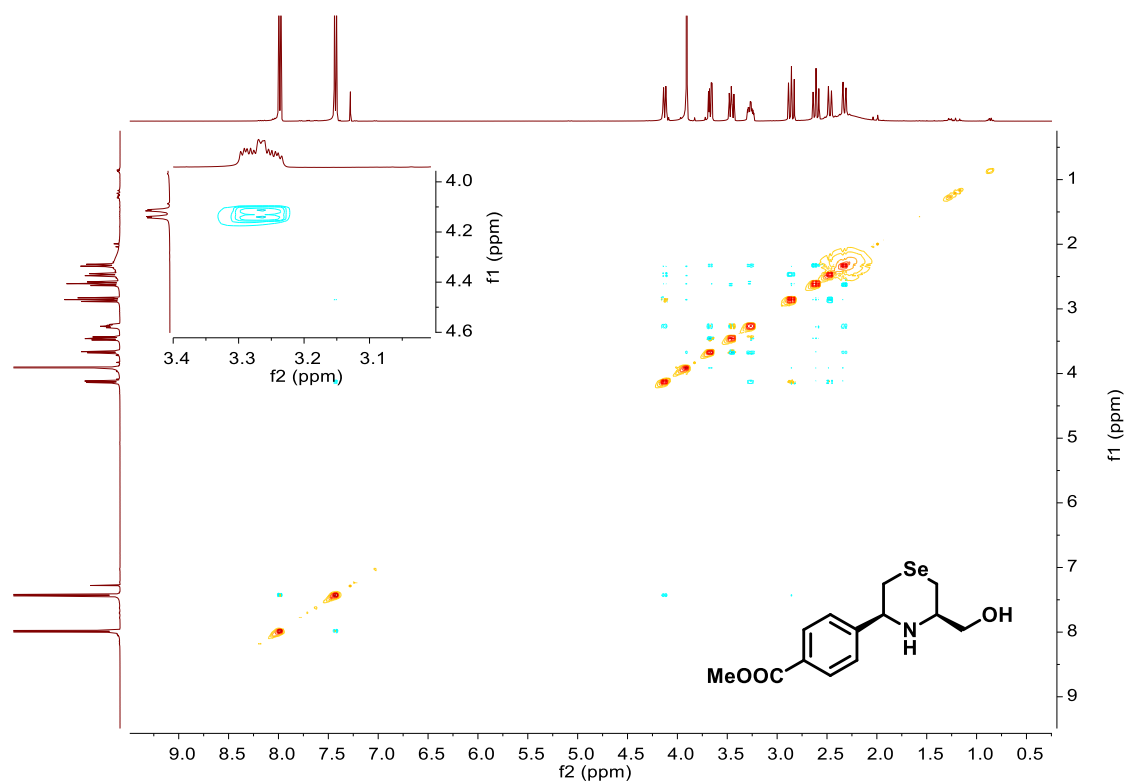

# DEPT90

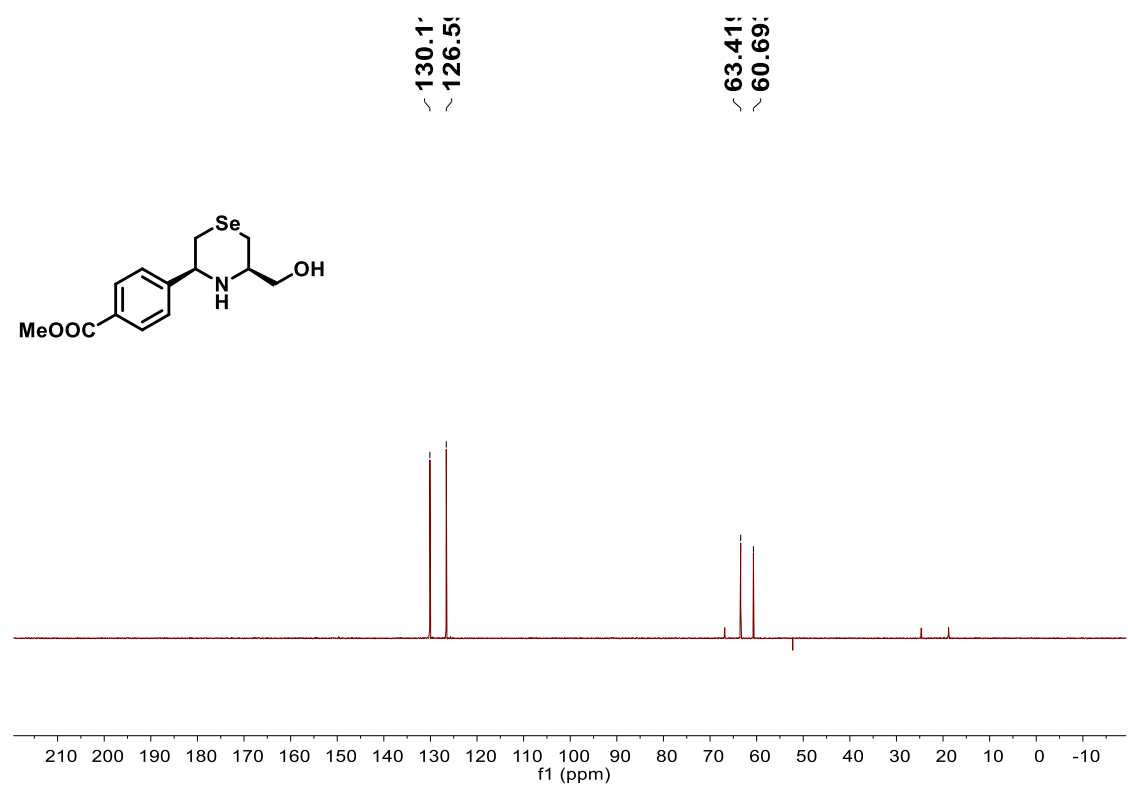



# HSQC

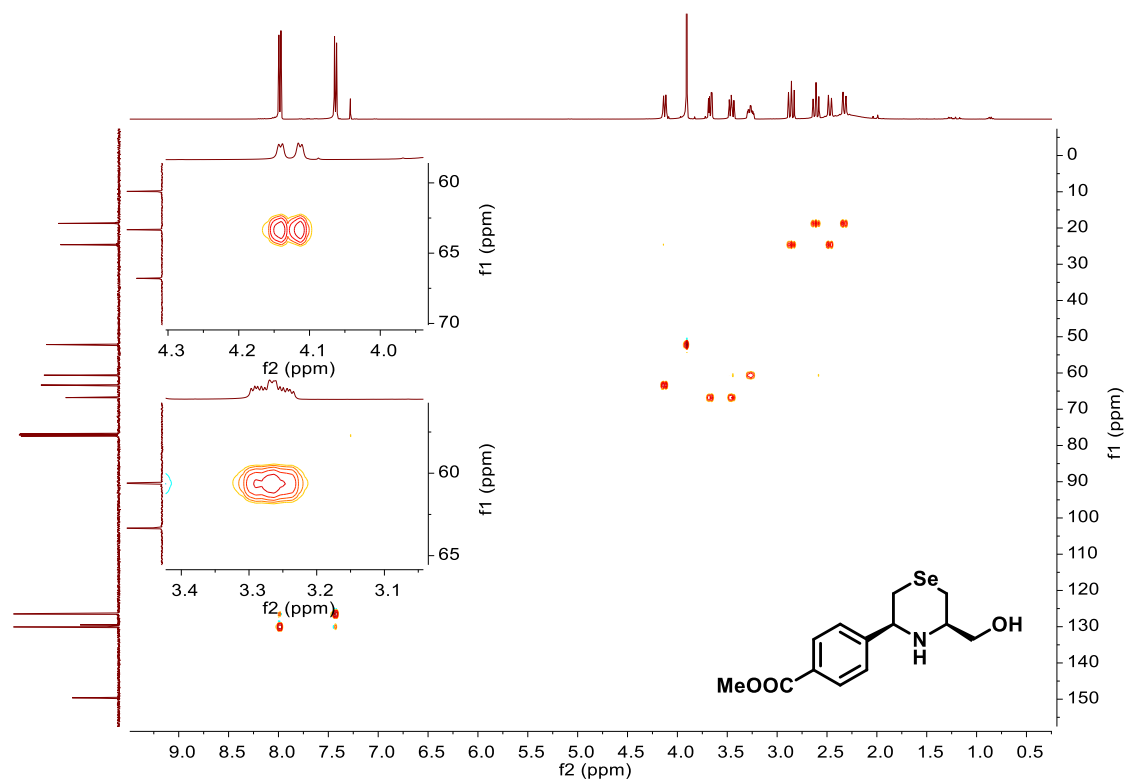

# HMBC

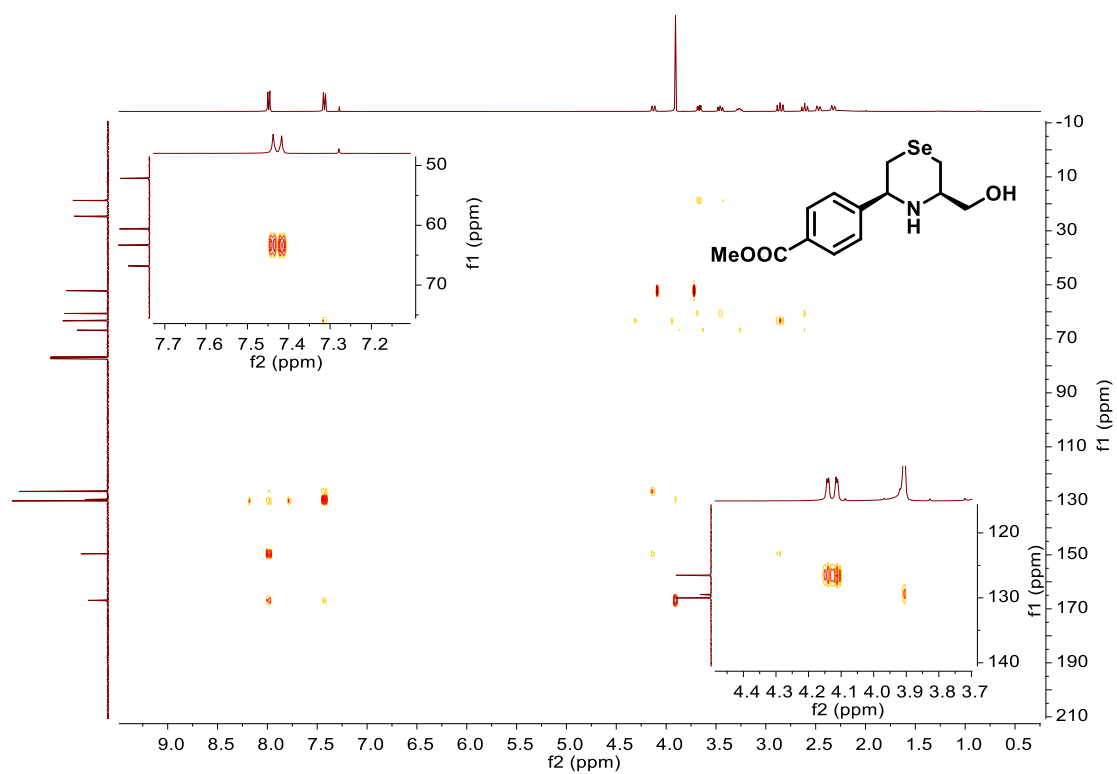



# Compound 4b

$^1\text{H}$  NMR (400 MHz,  $\text{CDCl}_3$ )

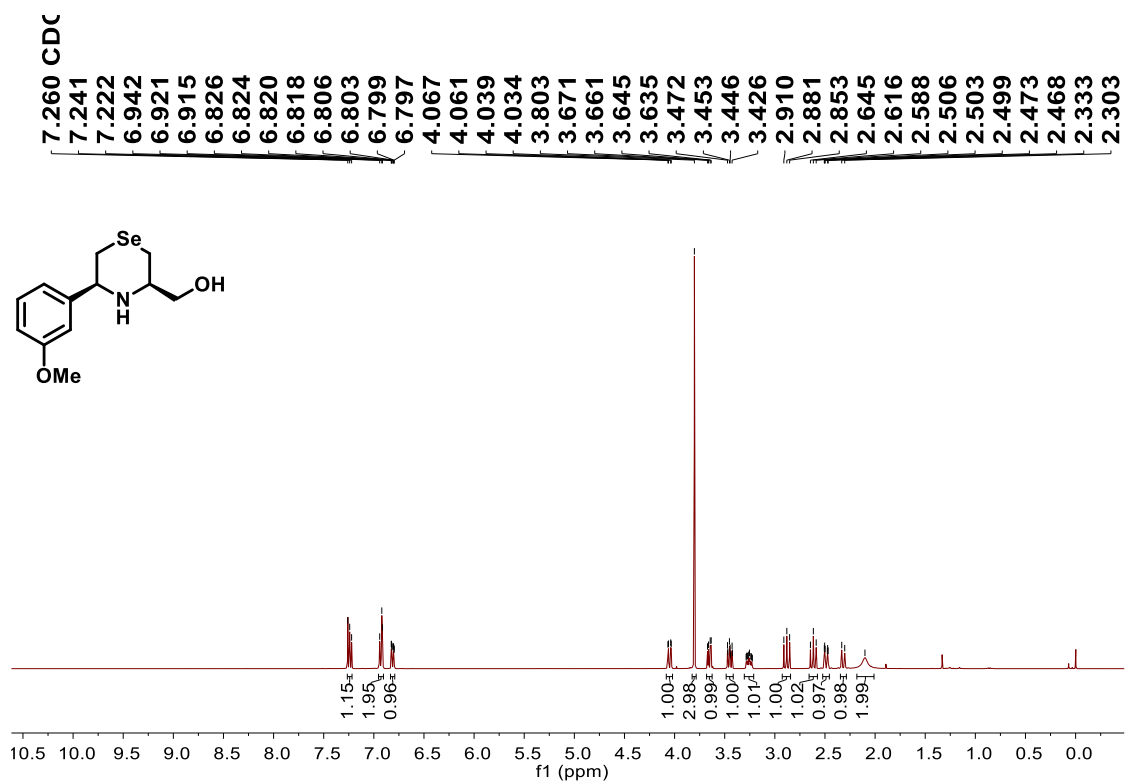

$^{13}\text{C}$  NMR (101 MHz,  $\text{CDCl}_3$ )

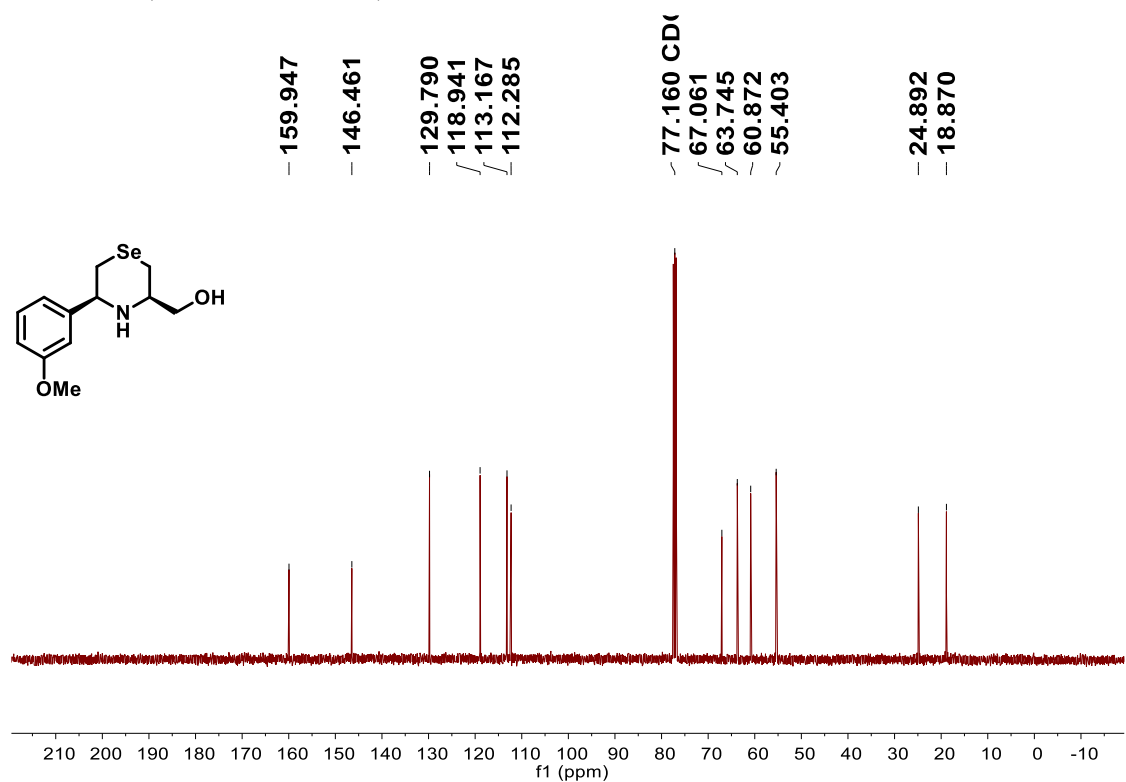



# Compound 4c

<sup>1</sup>H NMR (400 MHz, CDCl<sub>3</sub>)

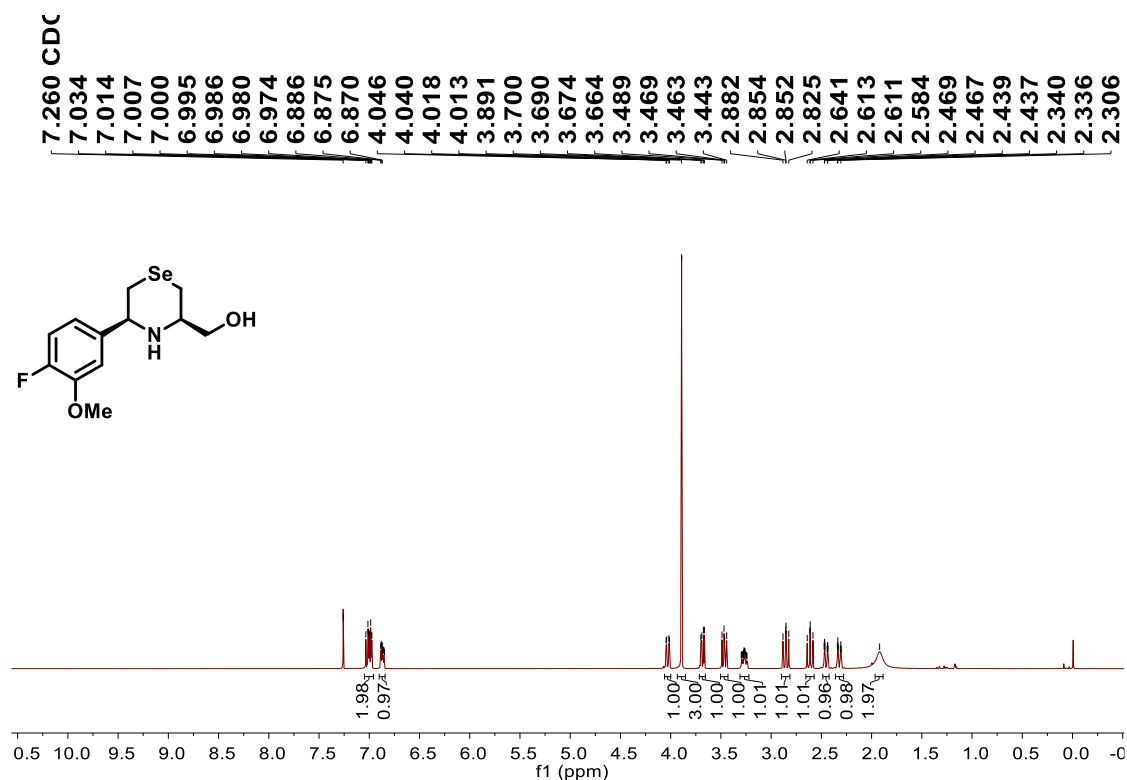

<sup>13</sup>C NMR (101 MHz, CDCl<sub>3</sub>)

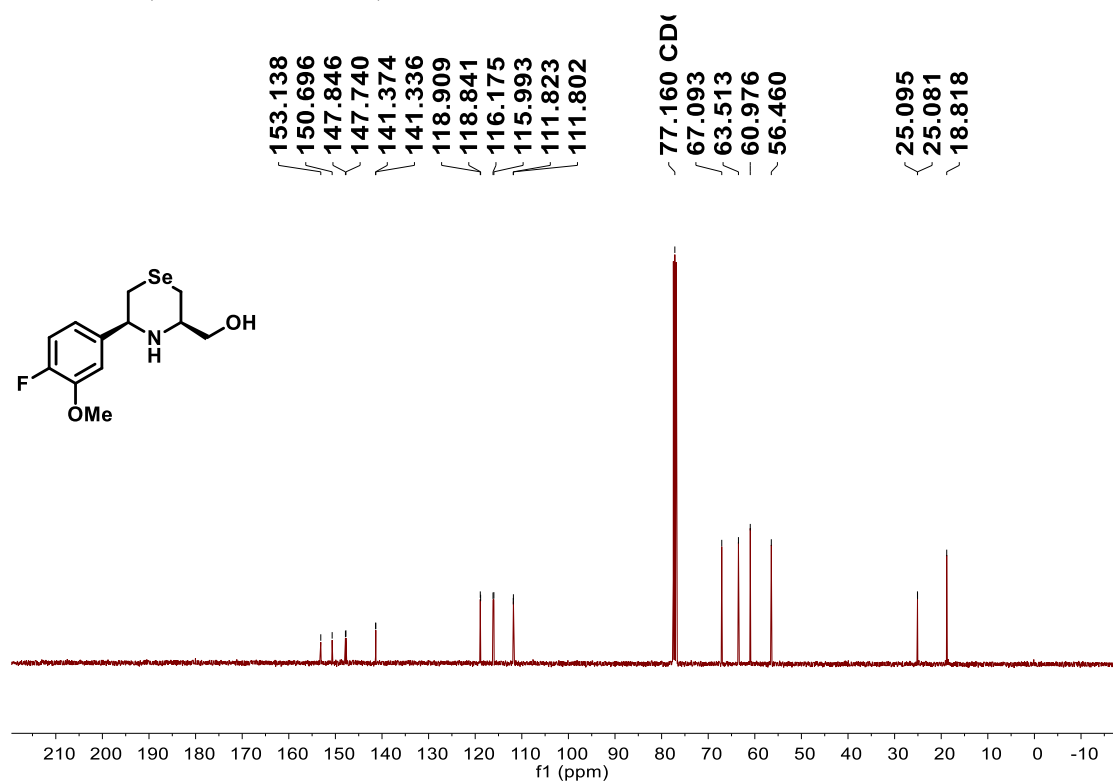



$^{19}\text{F}$  NMR (376 MHz,  $\text{CDCl}_3$ )

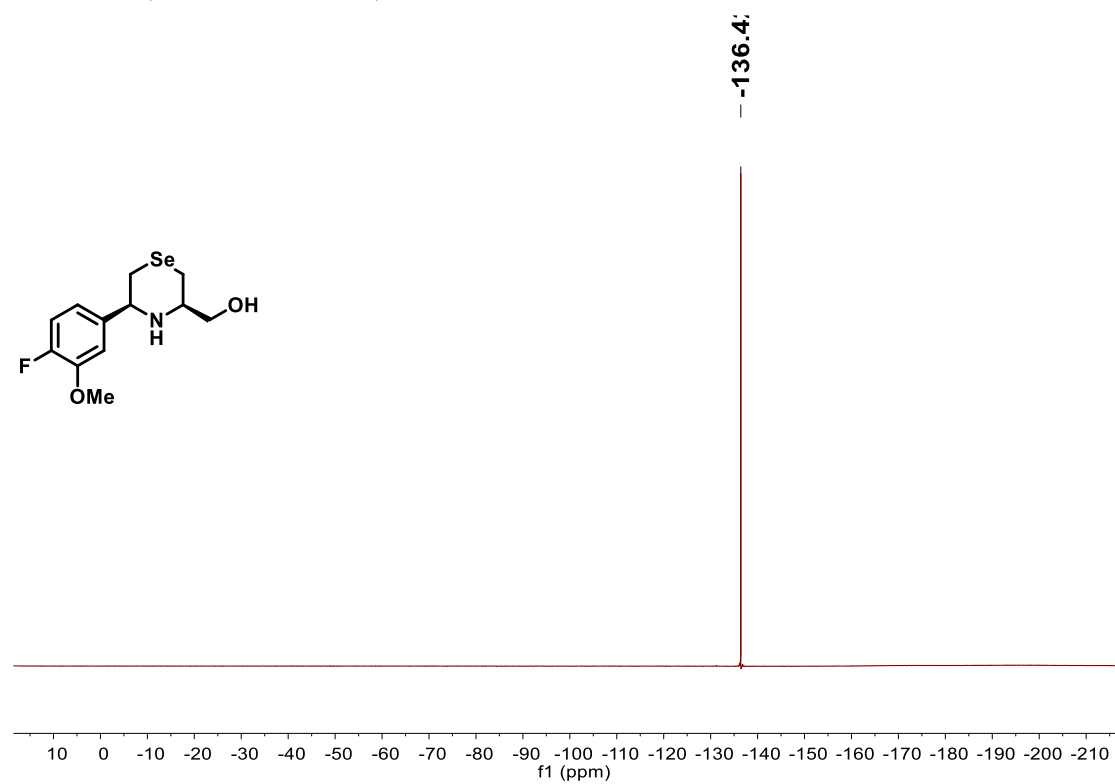



# Compound 4d

$^1\text{H}$  NMR (600 MHz,  $\text{CDCl}_3$ )

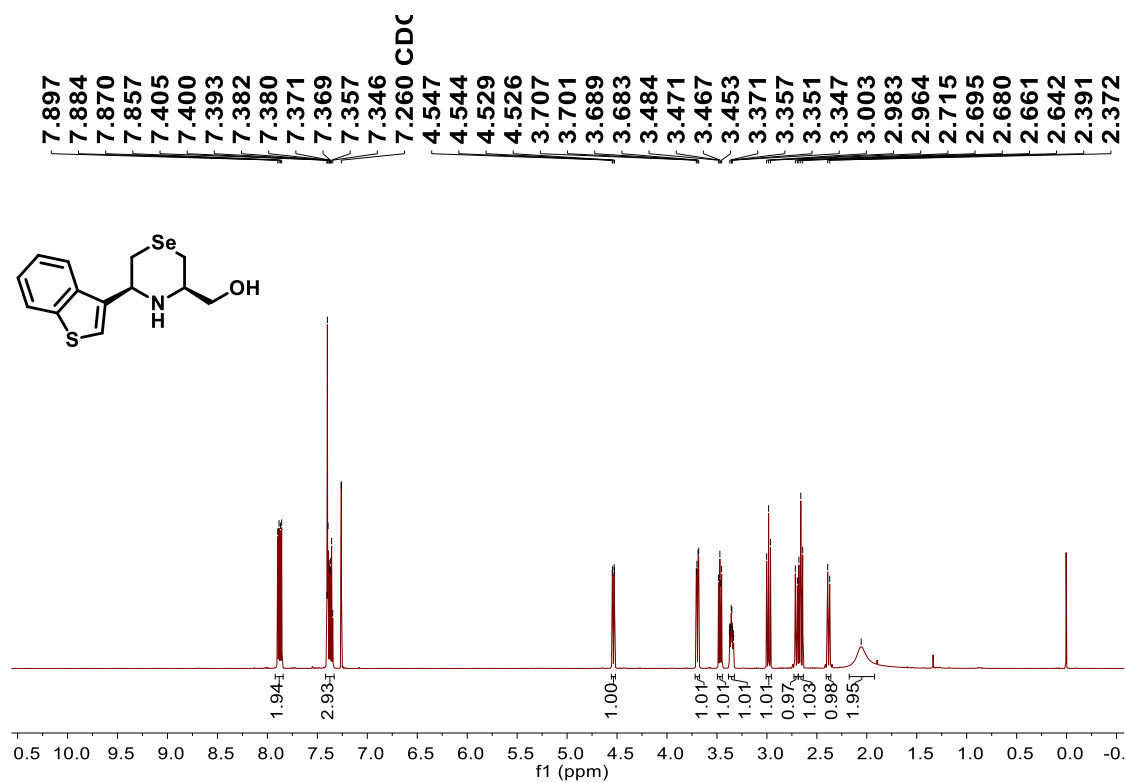

$^{13}\text{C}$  NMR (151 MHz,  $\text{CDCl}_3$ )

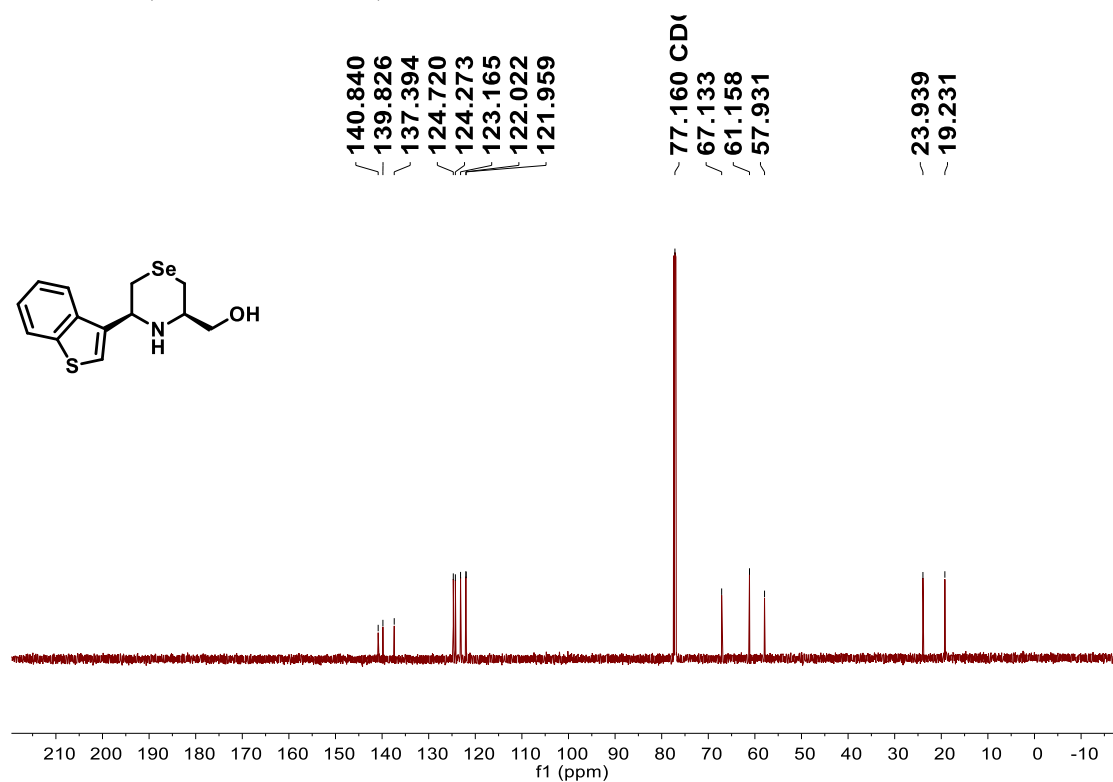



# Compound 5a

$^1\text{H}$  NMR (600 MHz,  $\text{CDCl}_3$ )

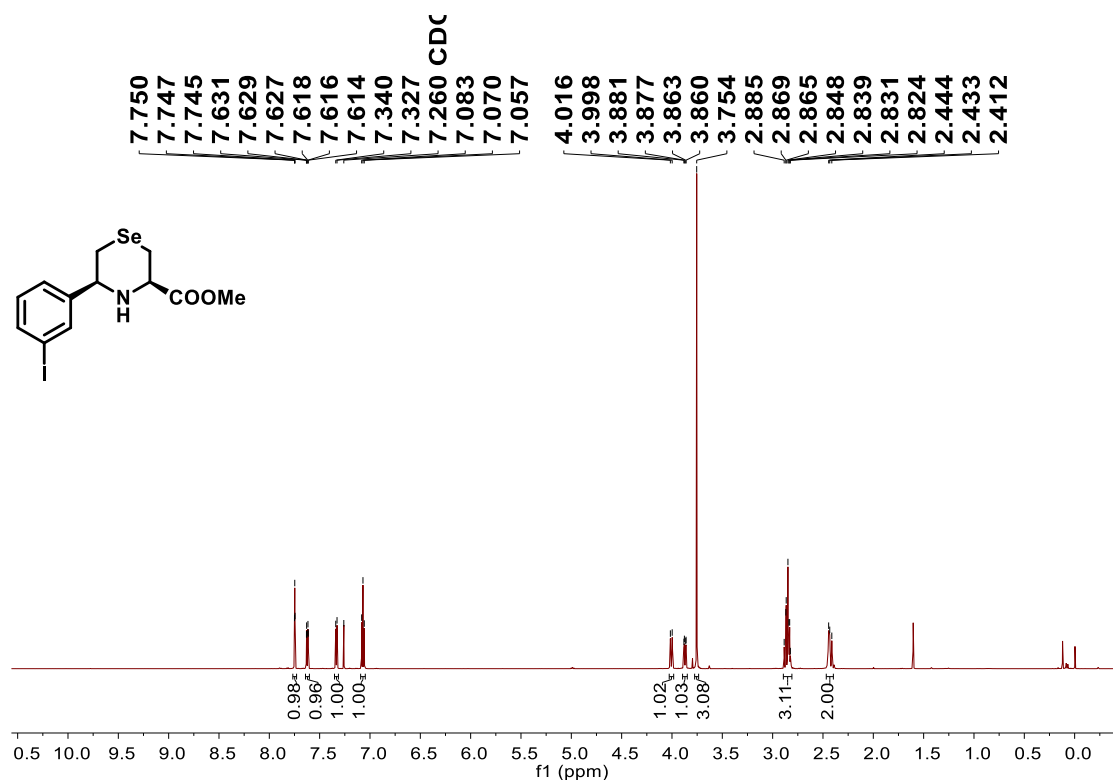

$^{13}\text{C}$  NMR (151 MHz,  $\text{CDCl}_3$ )

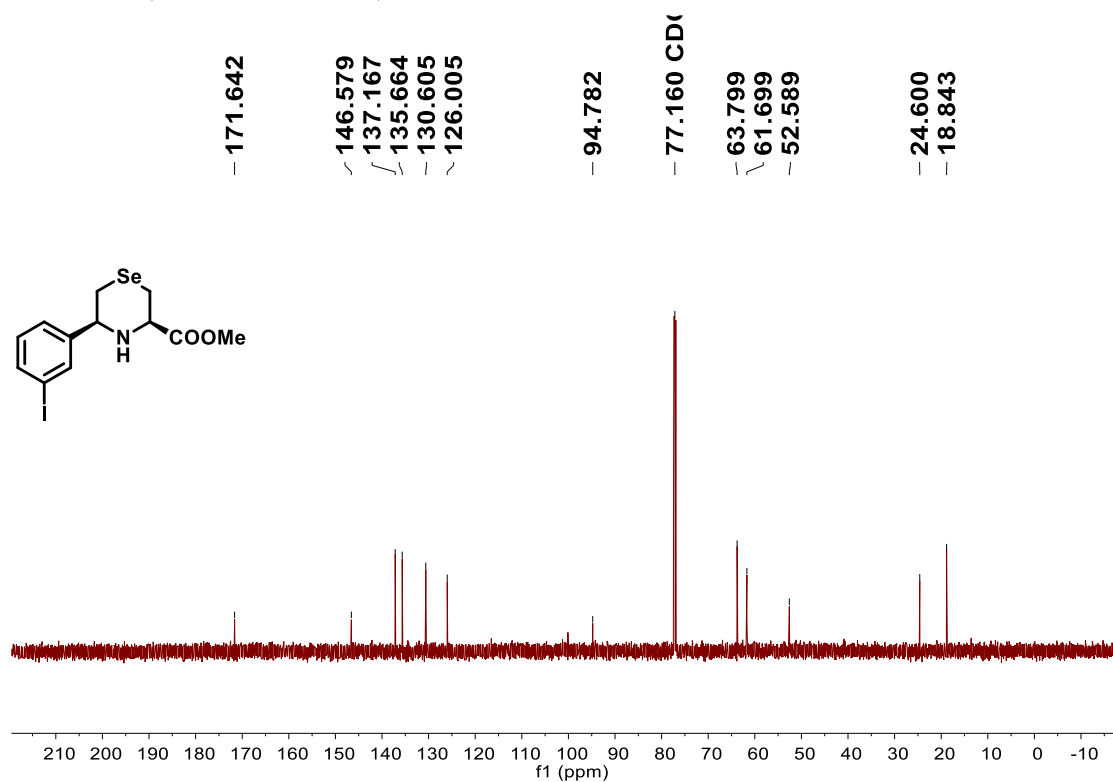



# NOESY

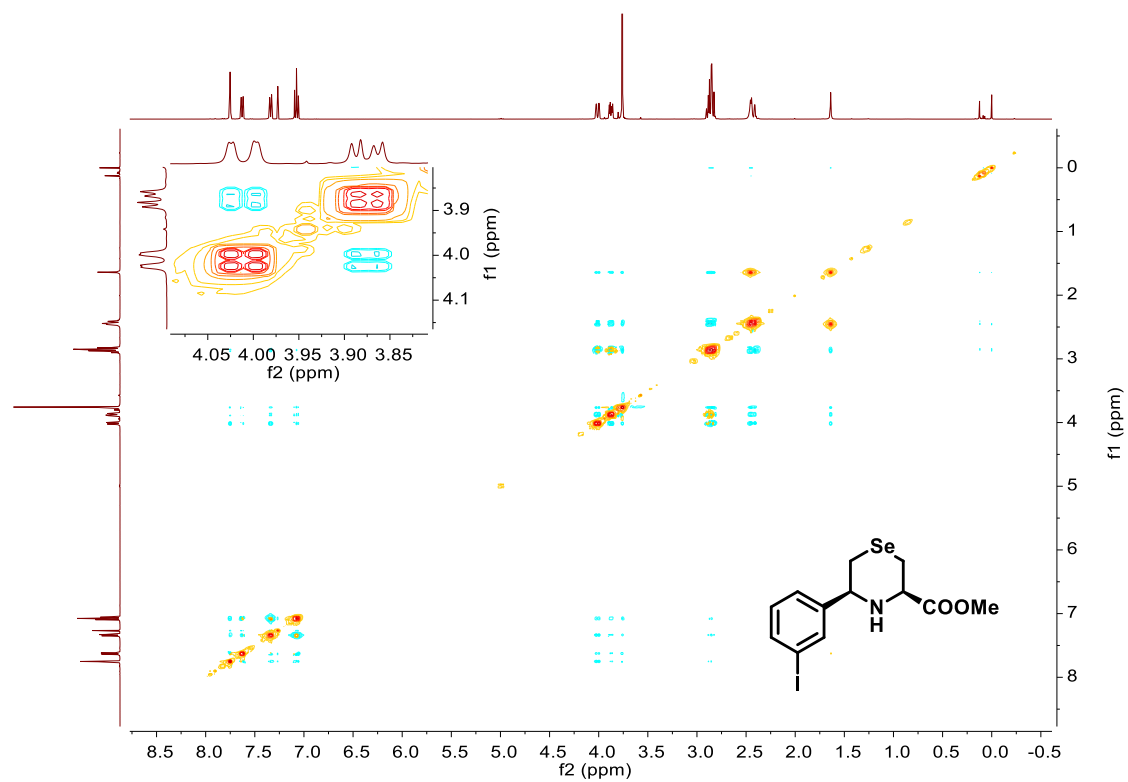



<sup>1</sup>H NMR (400 MHz, CDCl<sub>3</sub>)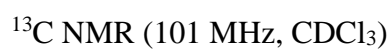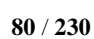



# Compound 6a

$^1\text{H}$  NMR (400 MHz,  $\text{CDCl}_3$ )

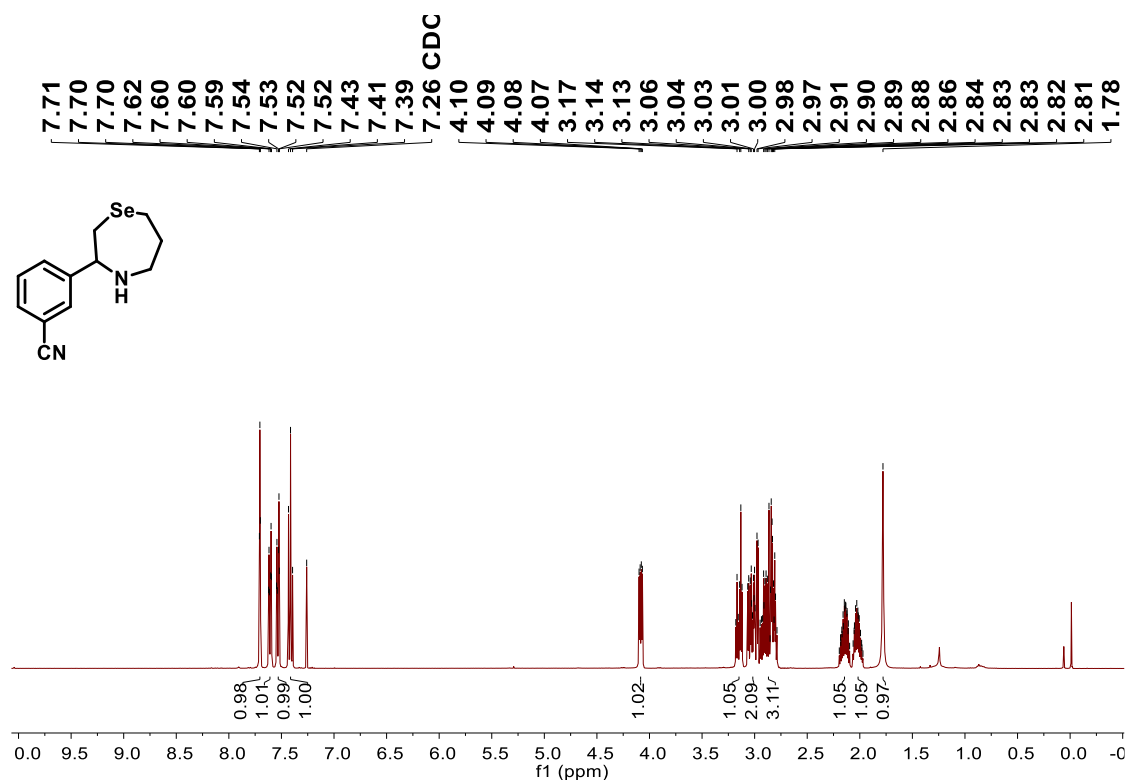

$^{13}\text{C}$  NMR (101 MHz,  $\text{CDCl}_3$ )

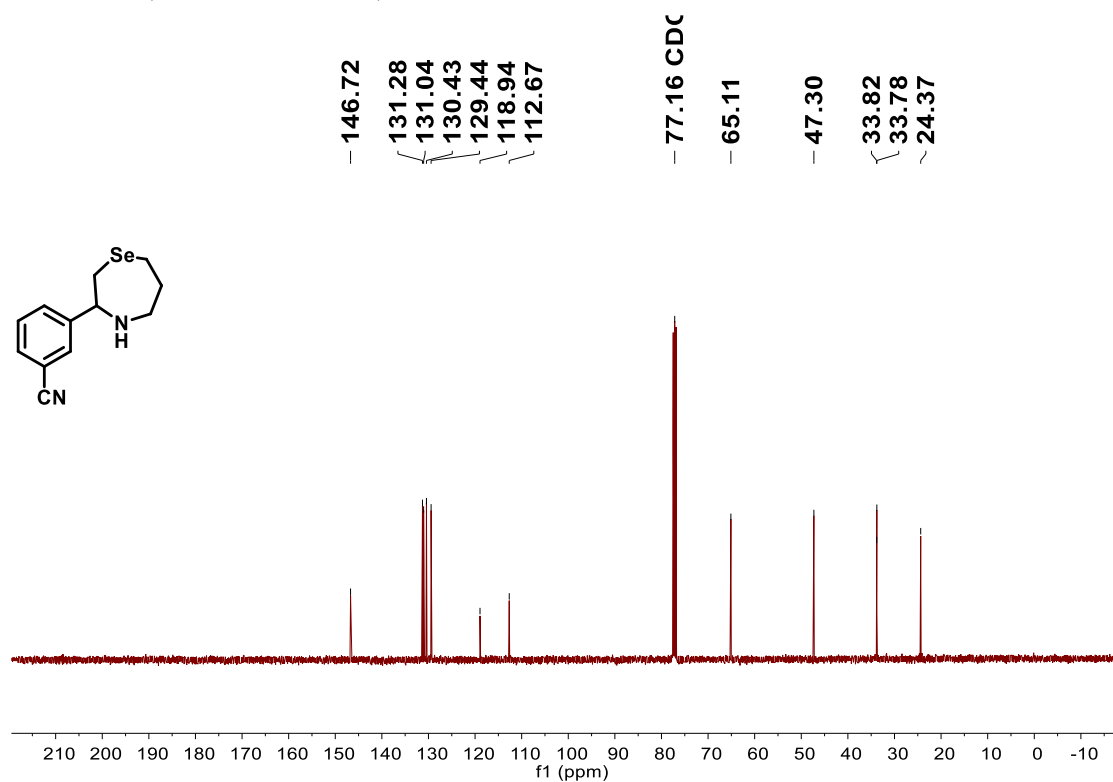



# Compound 6b

$^1\text{H}$  NMR (400 MHz,  $\text{CDCl}_3$ )

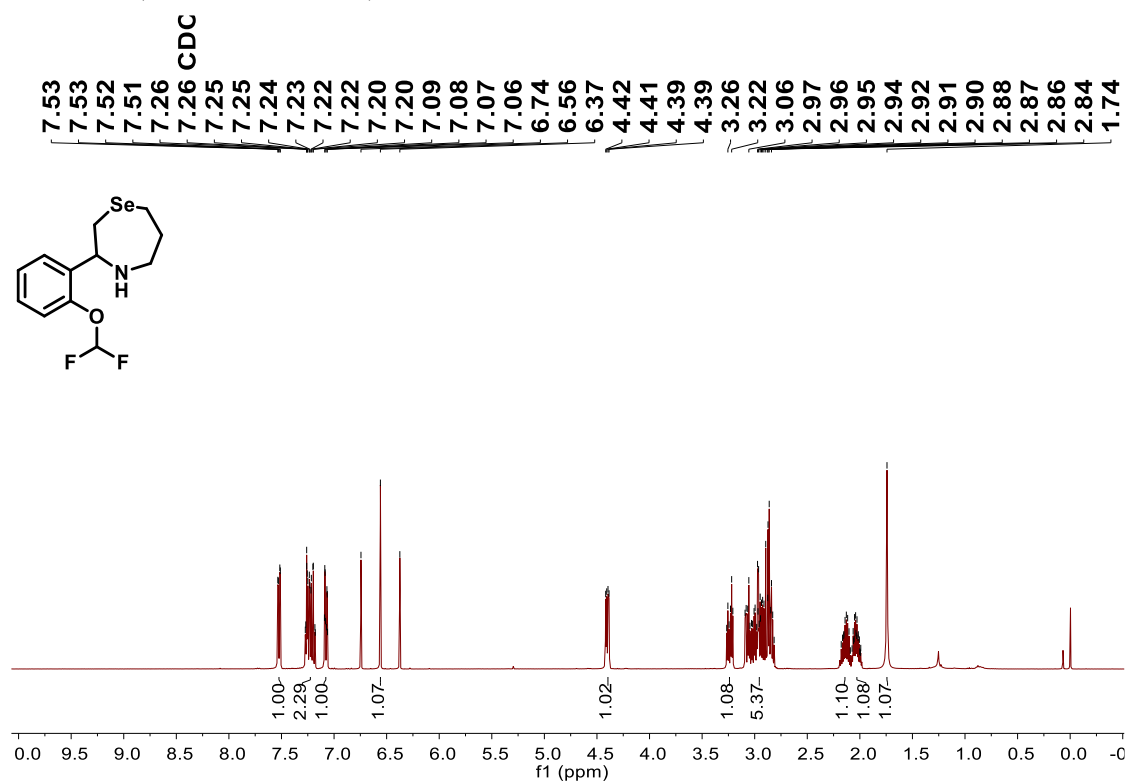

$^{13}\text{C}$  NMR (101 MHz,  $\text{CDCl}_3$ )

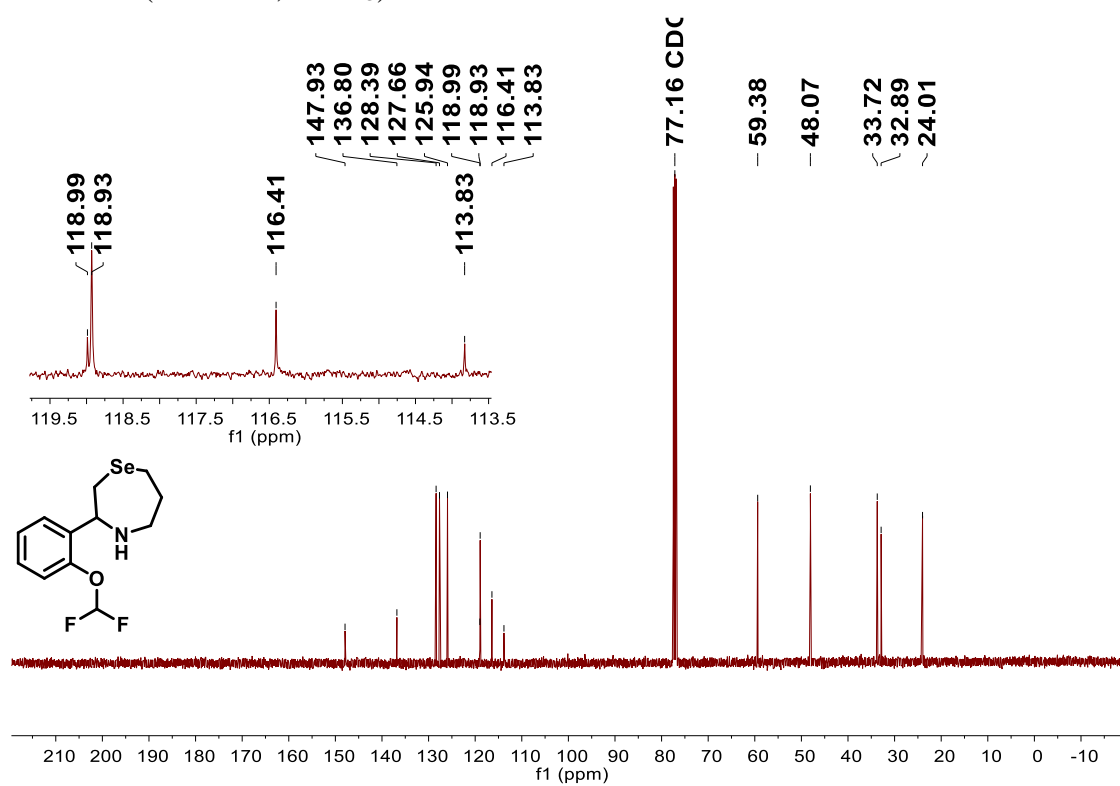



$^{19}\text{F}$  NMR (376 MHz,  $\text{CDCl}_3$ )

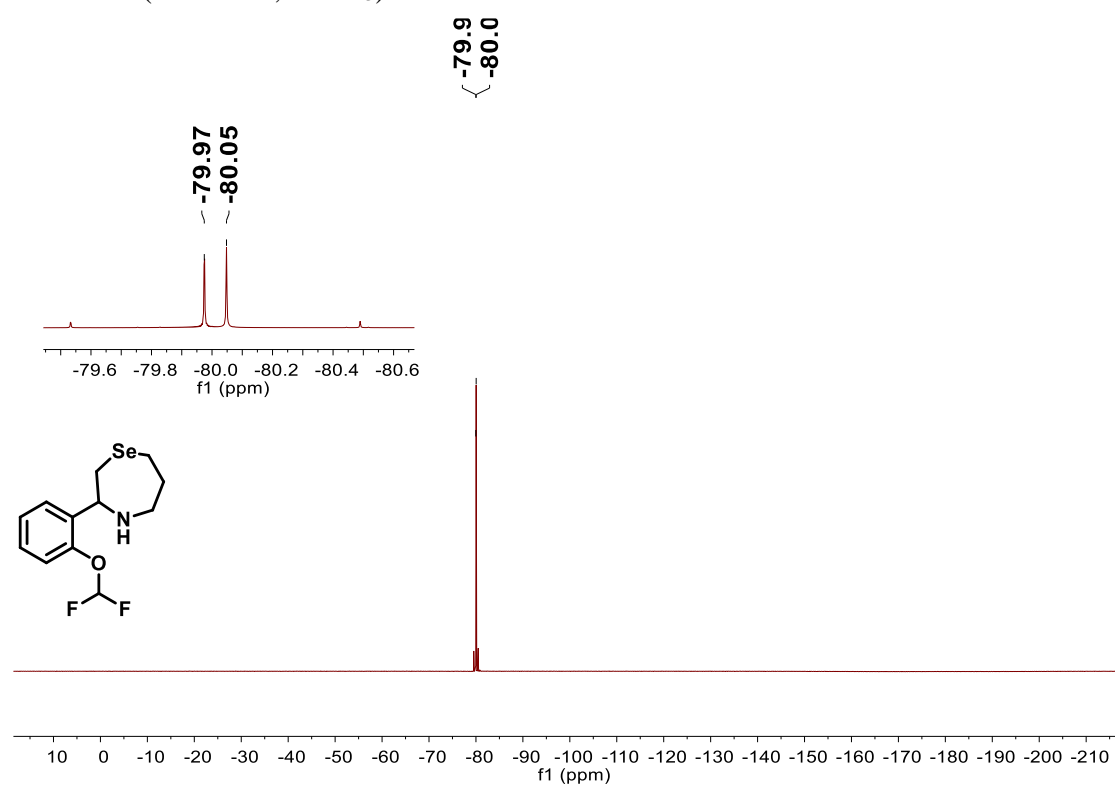



# Compound 6c

$^1\text{H}$  NMR (400 MHz,  $\text{CDCl}_3$ )

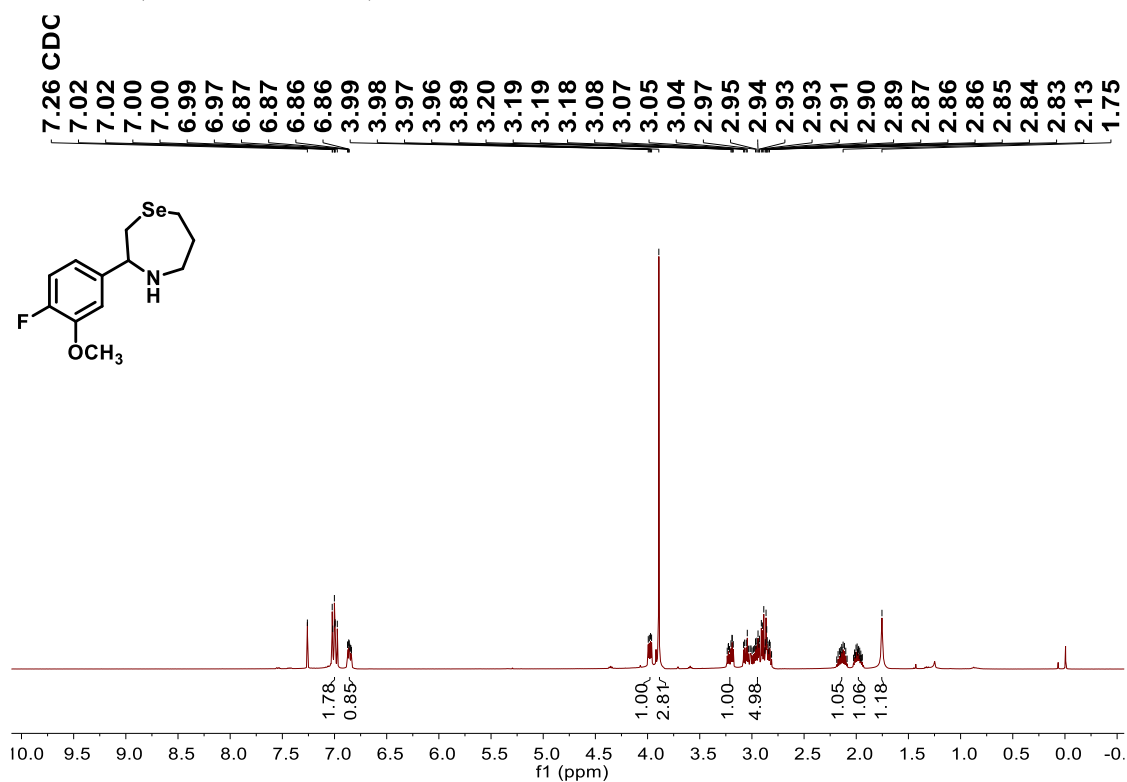

$^{13}\text{C}$  NMR (101 MHz,  $\text{CDCl}_3$ )

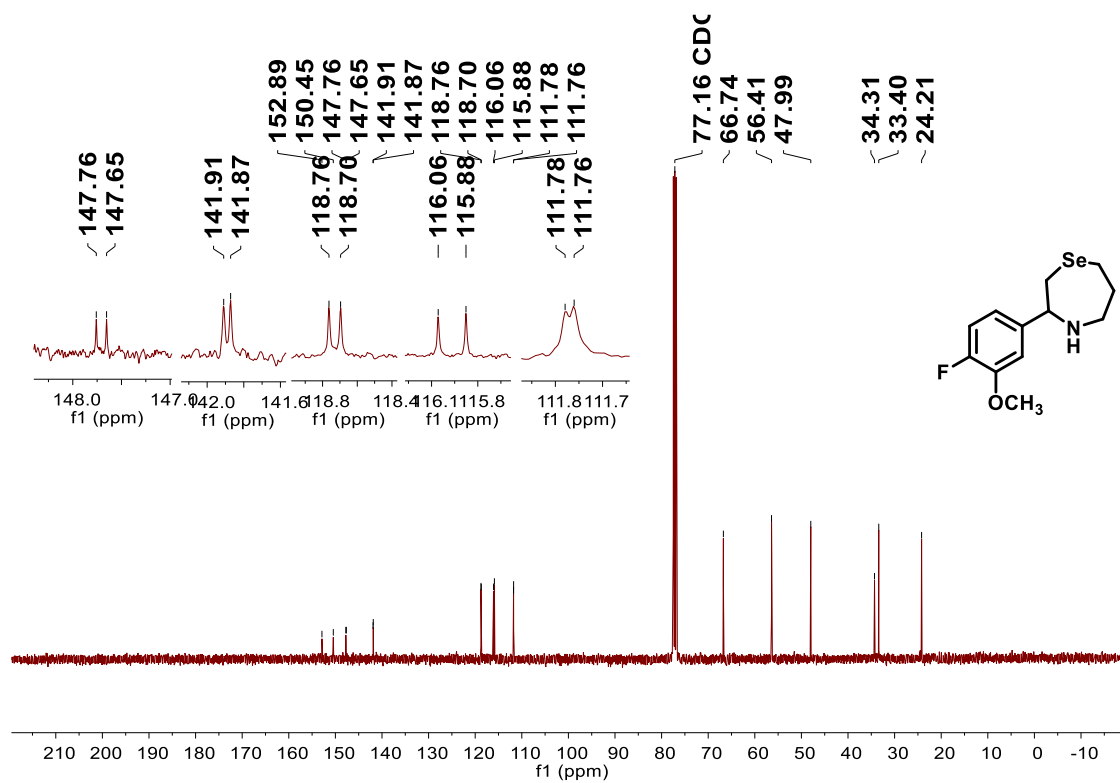



$^{19}\text{F}$  NMR (376 MHz,  $\text{CDCl}_3$ )

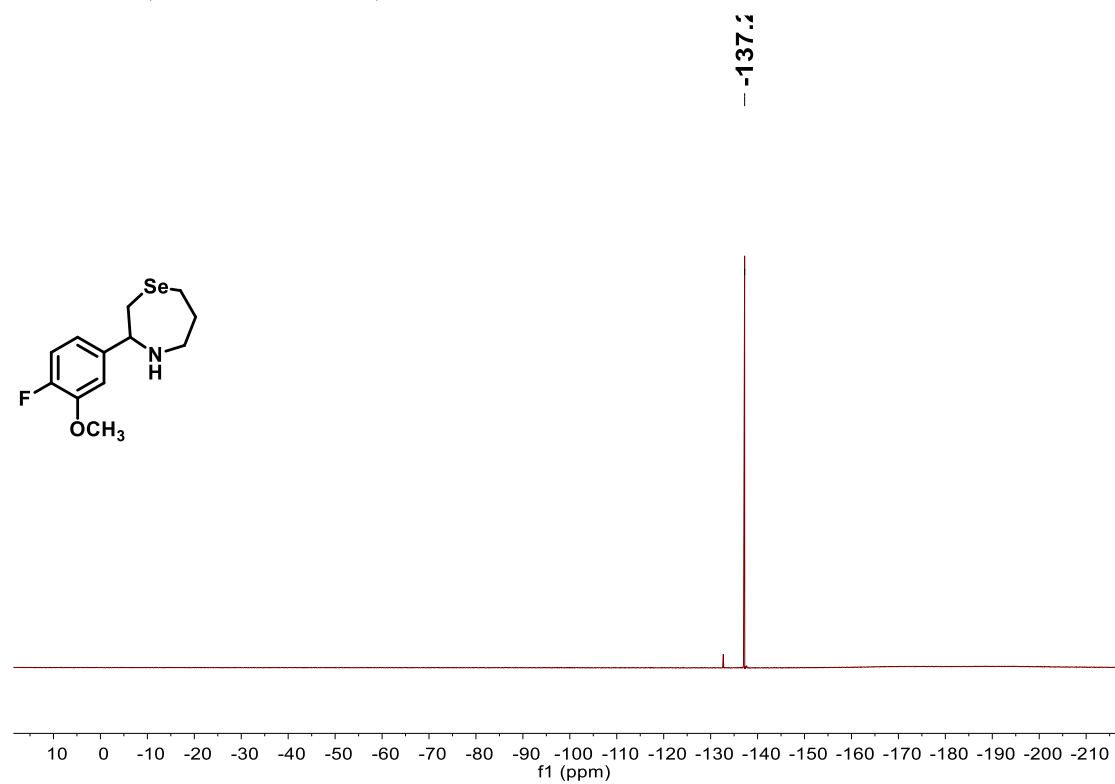



# Compound 6d

$^1\text{H}$  NMR (400 MHz,  $\text{CDCl}_3$ )

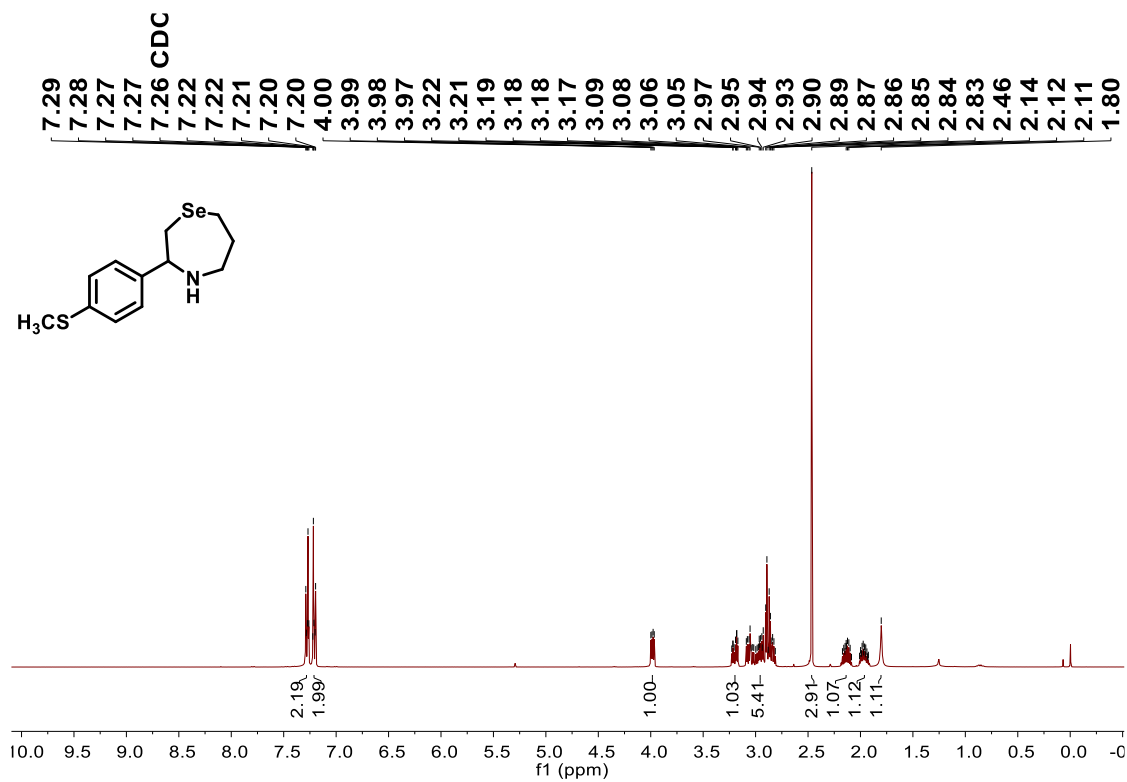

$^{13}\text{C}$  NMR (101 MHz,  $\text{CDCl}_3$ )

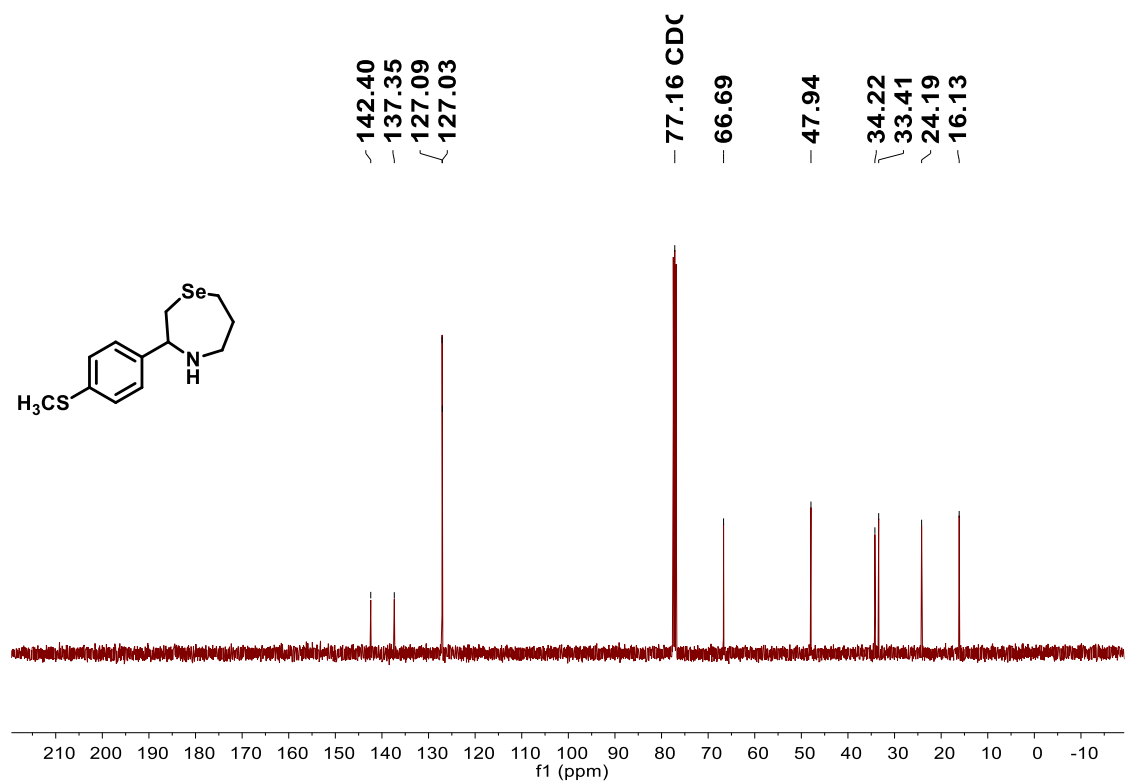



# Compound 6e

$^1\text{H}$  NMR (400 MHz,  $\text{CDCl}_3$ )

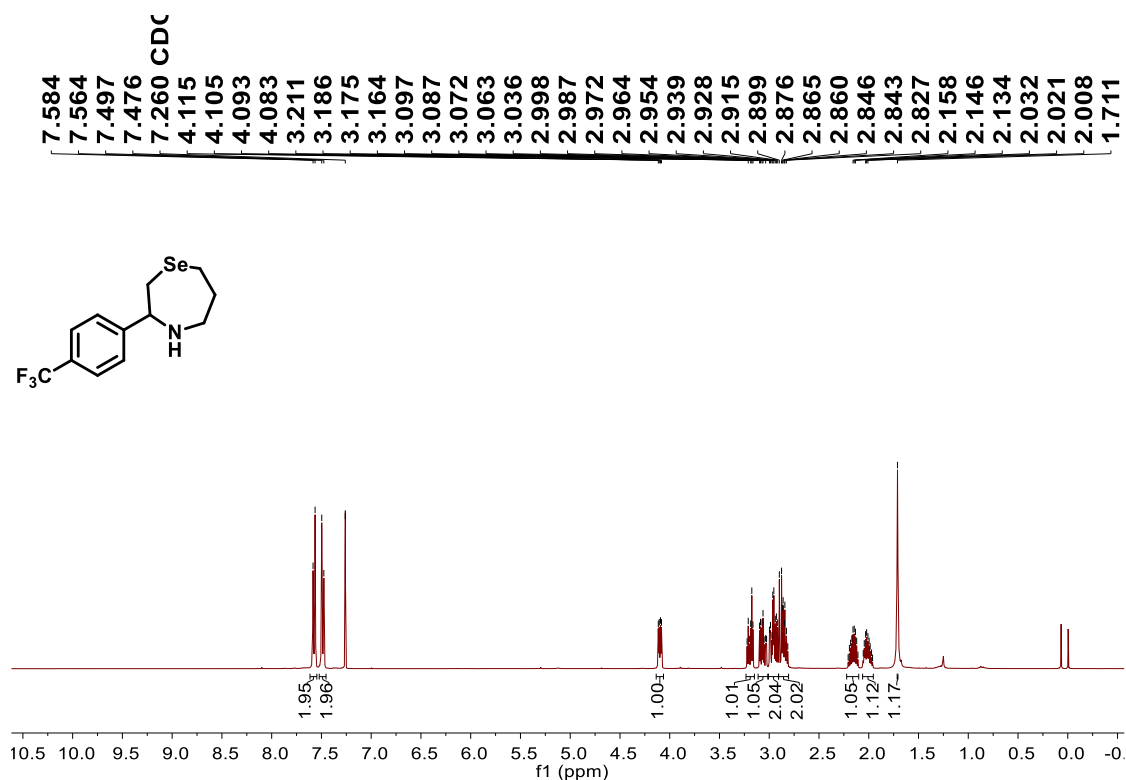

$^{13}\text{C}$  NMR (101 MHz,  $\text{CDCl}_3$ )

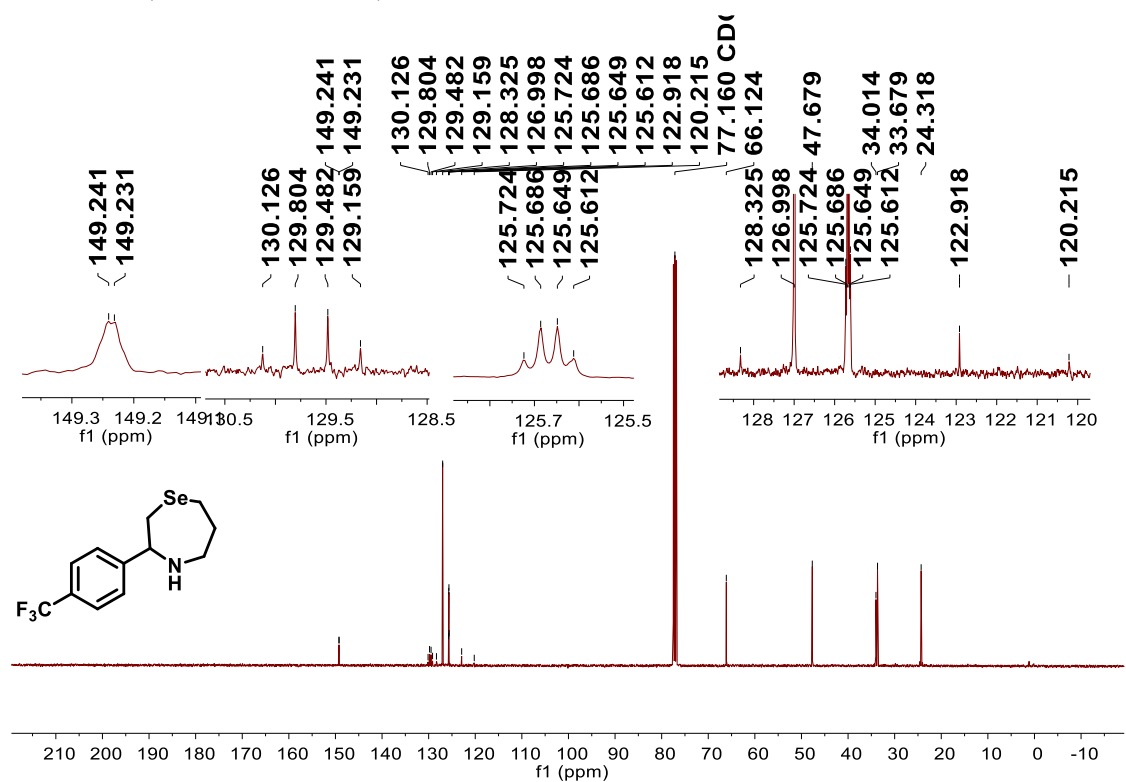



$^{19}\text{F}$  NMR (376 MHz,  $\text{CDCl}_3$ )

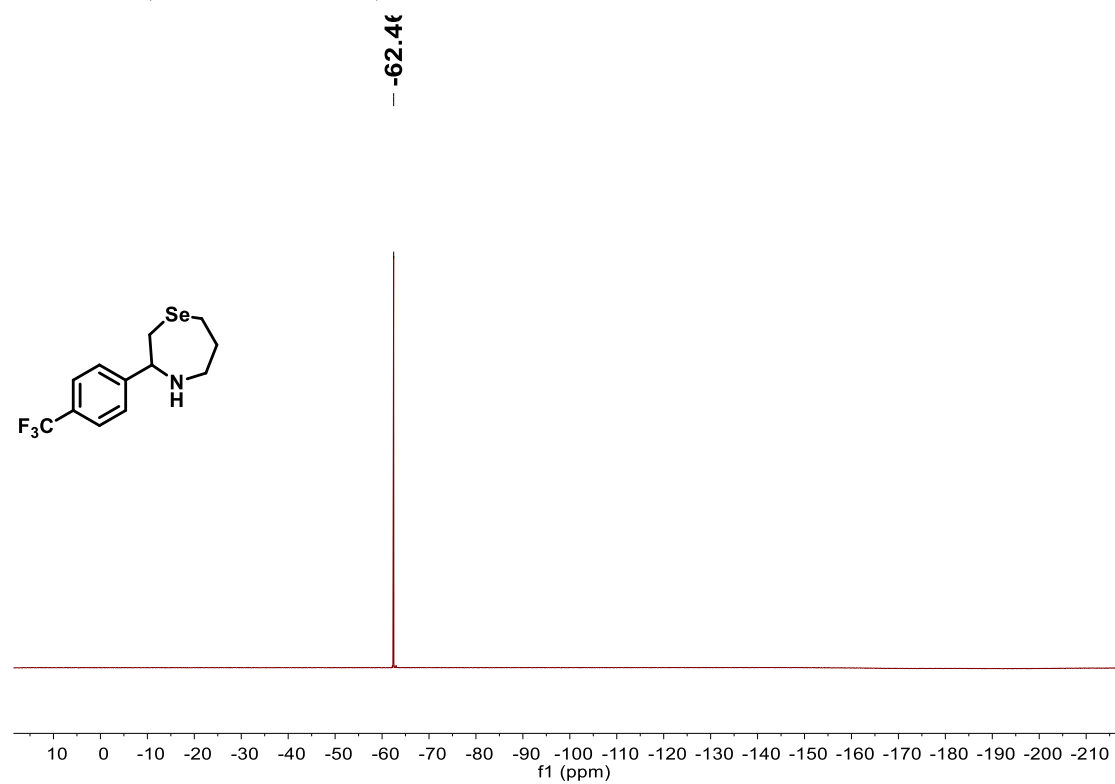



# Compound 6f

$^1\text{H}$  NMR (400 MHz,  $\text{CDCl}_3$ )

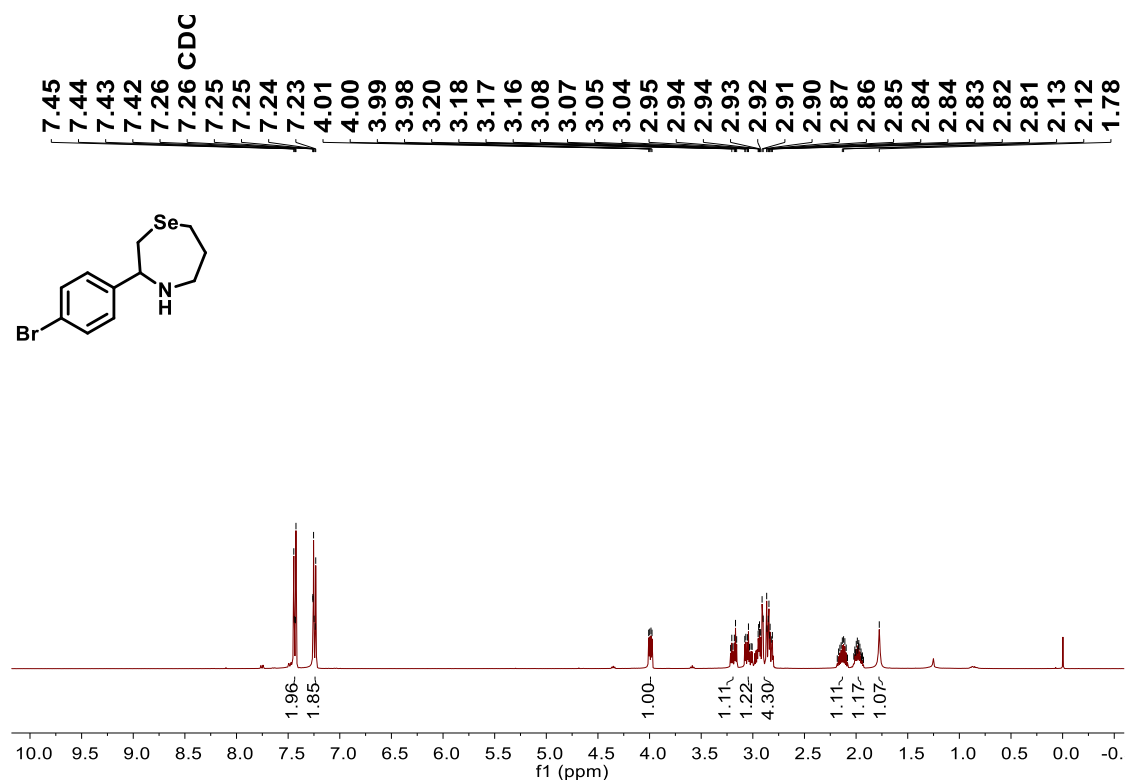

$^{13}\text{C}$  NMR (101 MHz,  $\text{CDCl}_3$ )

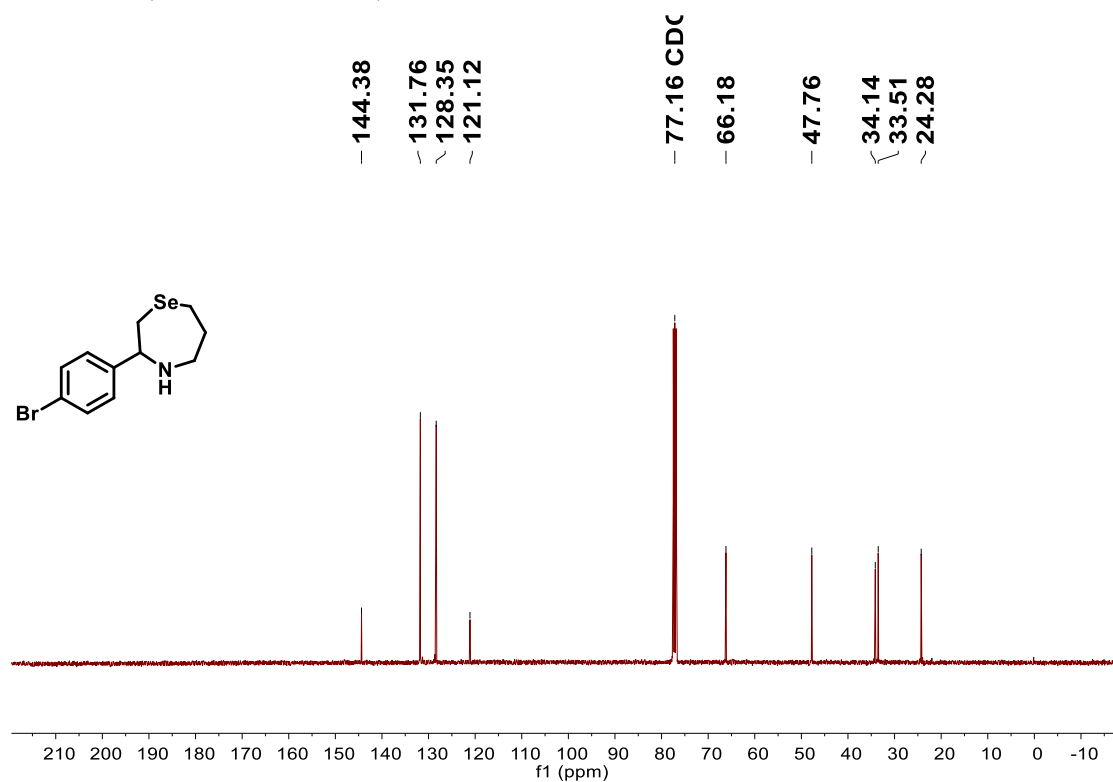



# Compound 6g

$^1\text{H}$  NMR (400 MHz,  $\text{CDCl}_3$ )

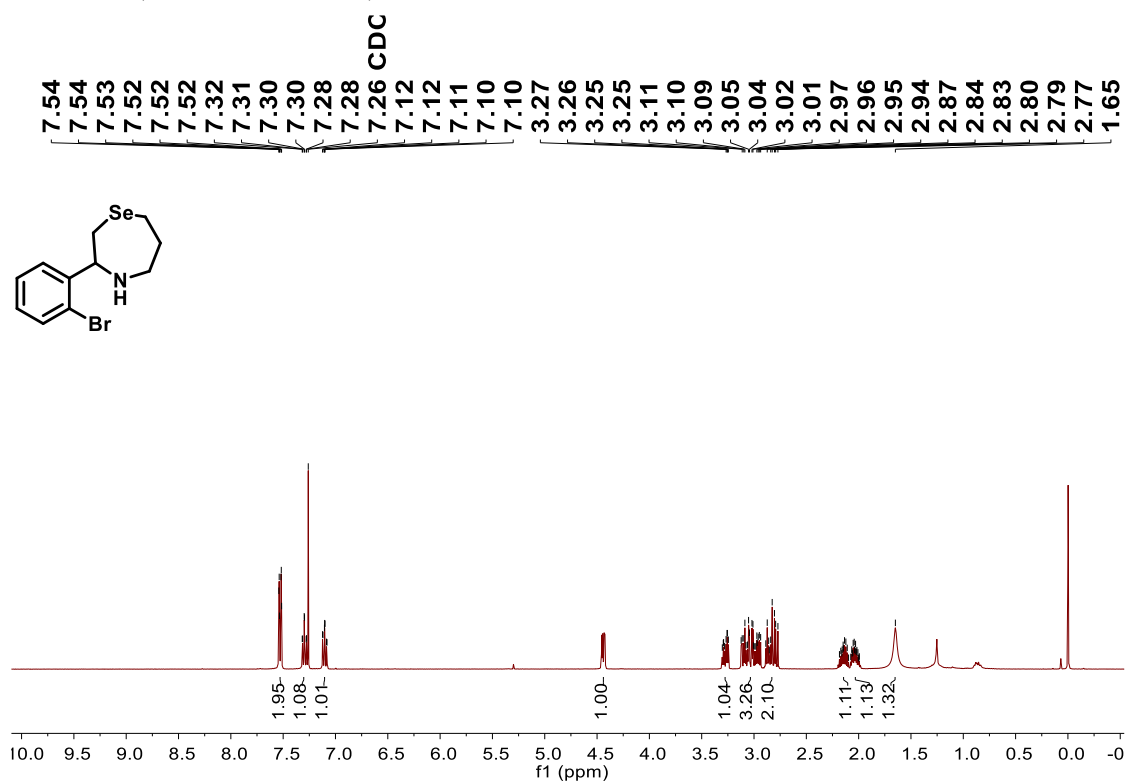

$^{13}\text{C}$  NMR (101 MHz,  $\text{CDCl}_3$ )

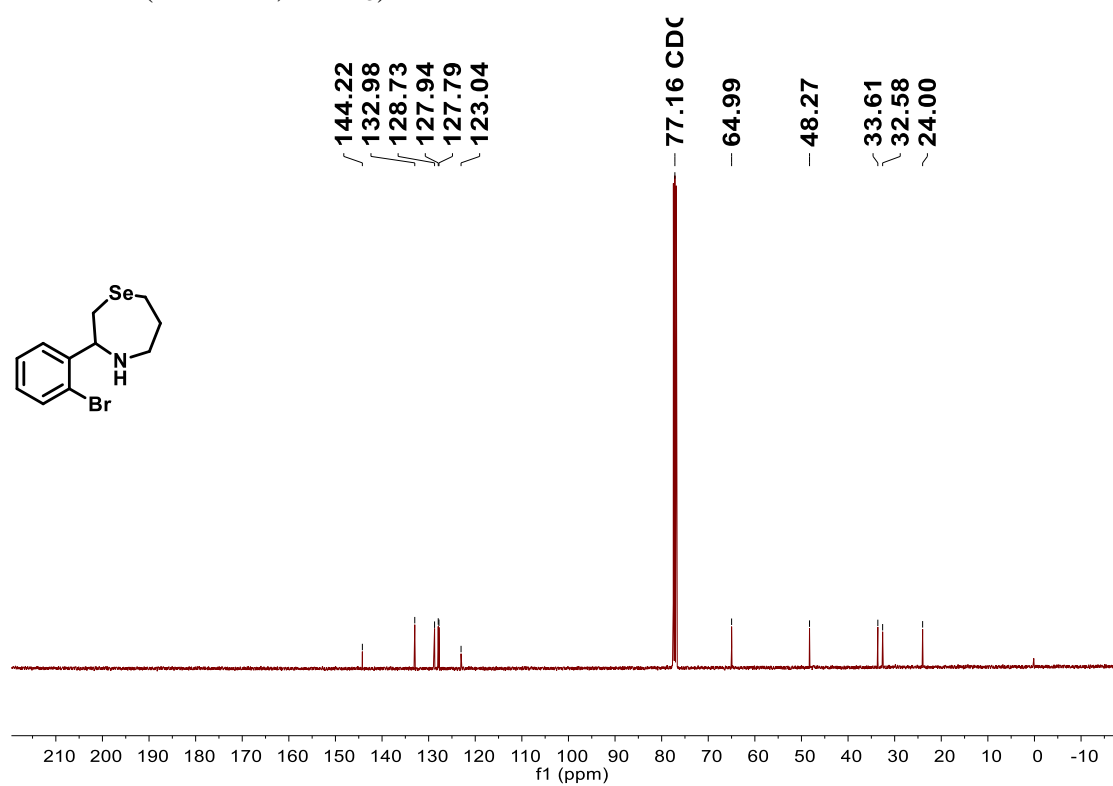



# Compound 6h

$^1\text{H}$  NMR (400 MHz,  $\text{CDCl}_3$ )

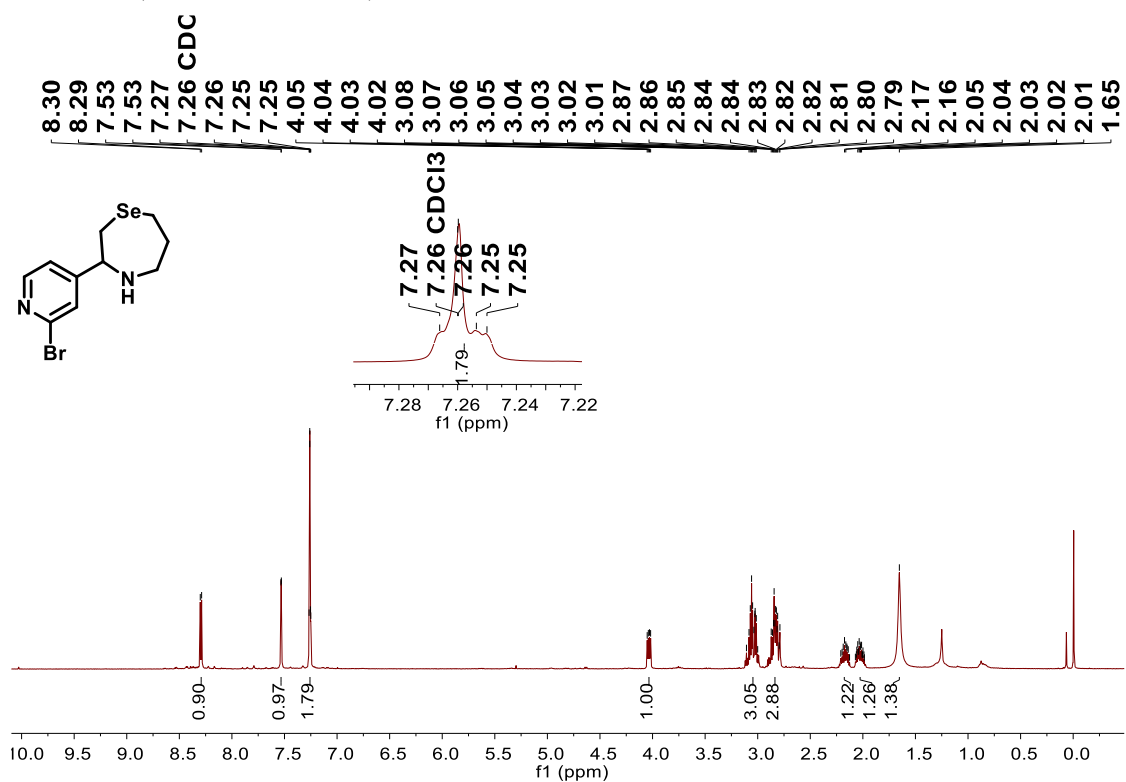

$^{13}\text{C}$  NMR (101 MHz,  $\text{CDCl}_3$ )

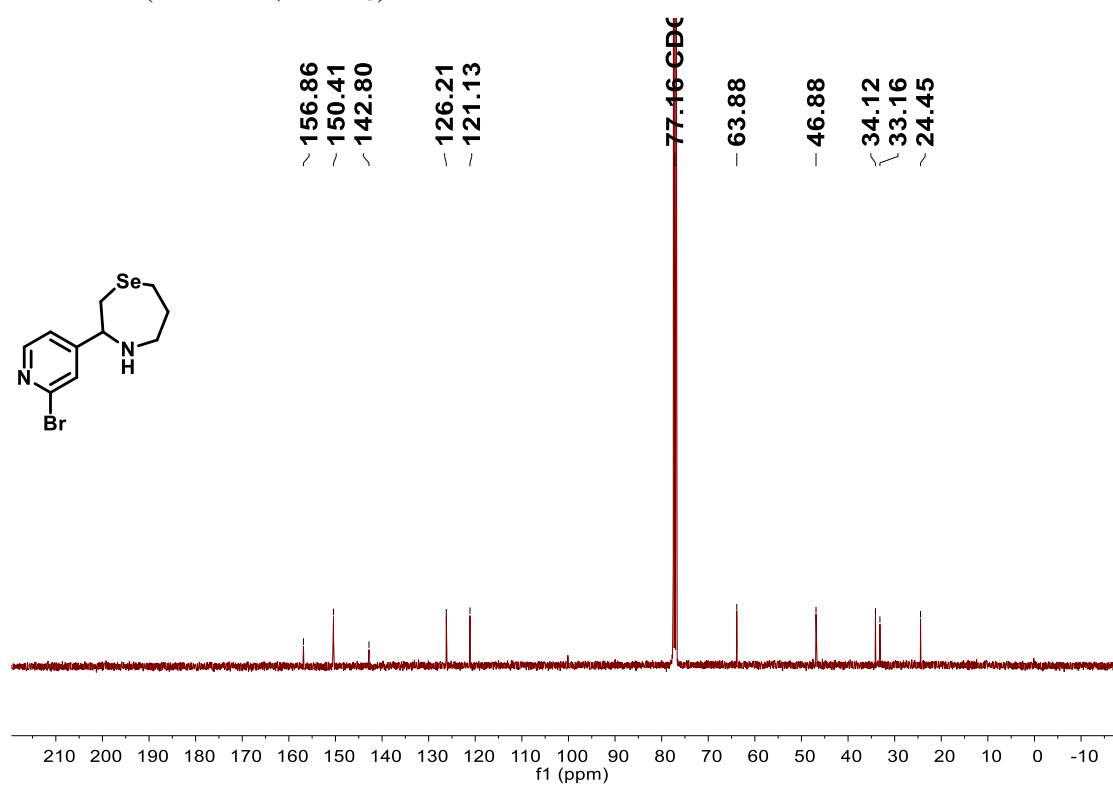



# Compound 6i

$^1\text{H}$  NMR (400 MHz,  $\text{CDCl}_3$ )

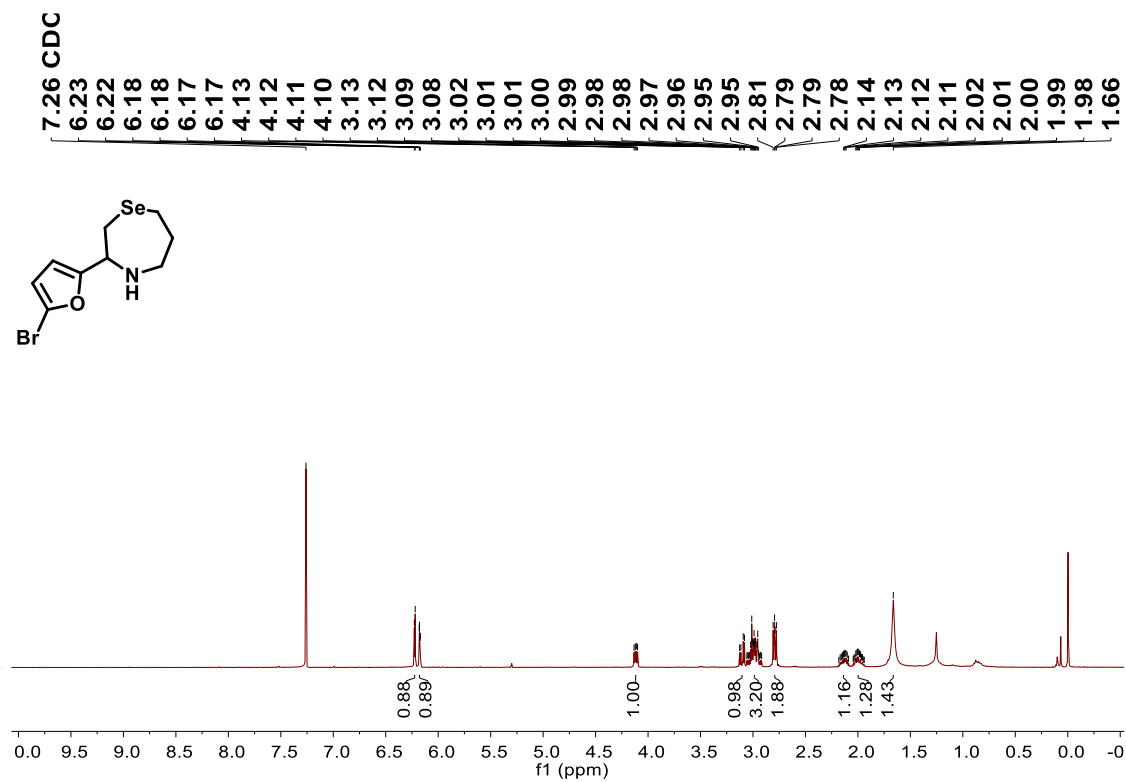

$^{13}\text{C}$  NMR (101 MHz,  $\text{CDCl}_3$ )

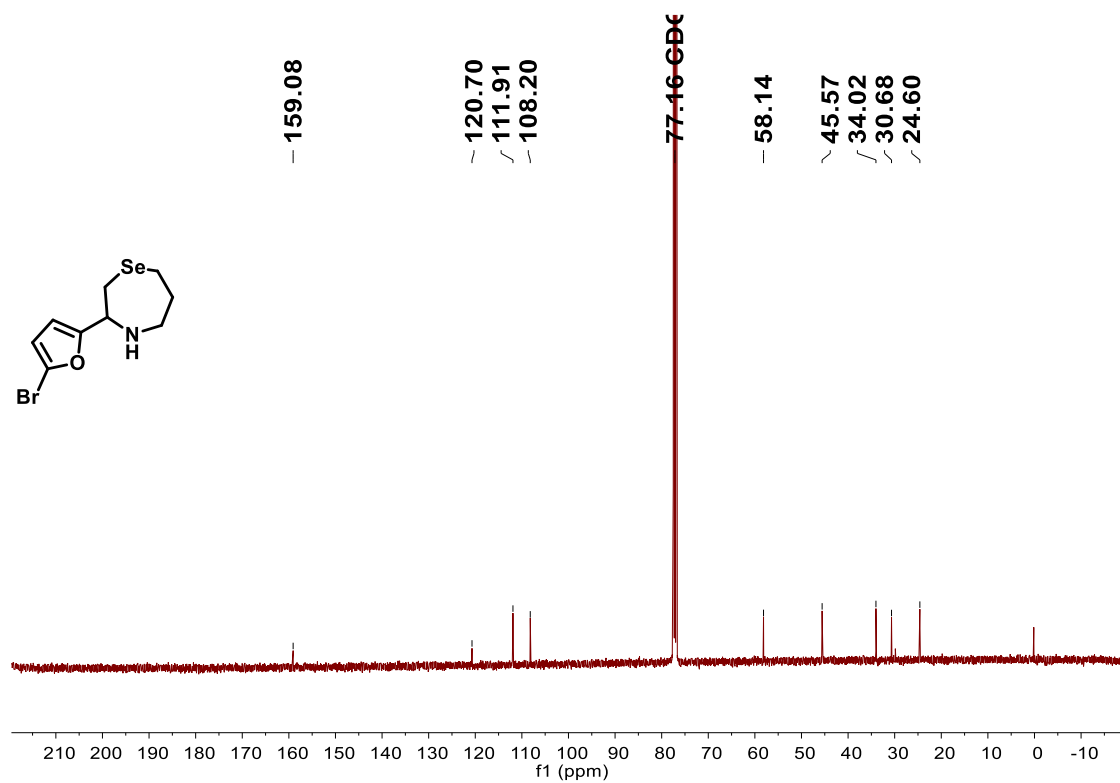



# Compound 6j

$^1\text{H}$  NMR (400 MHz,  $\text{CDCl}_3$ )

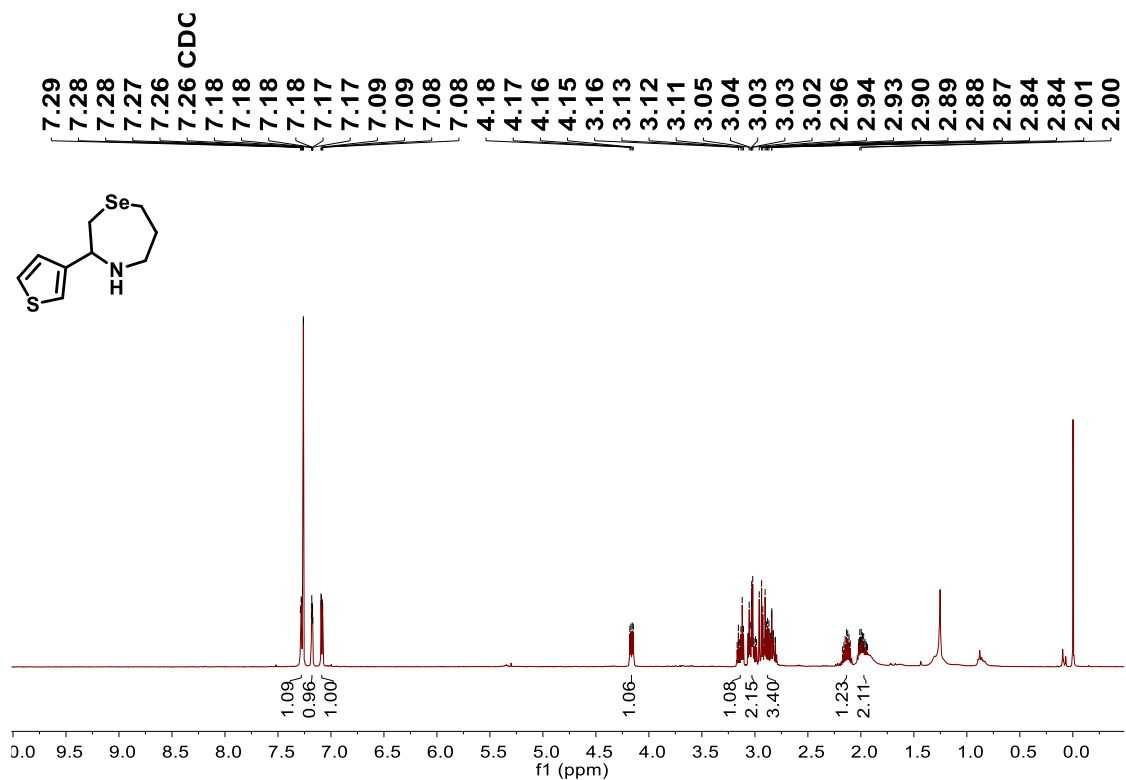

$^{13}\text{C}$  NMR (101 MHz,  $\text{CDCl}_3$ )

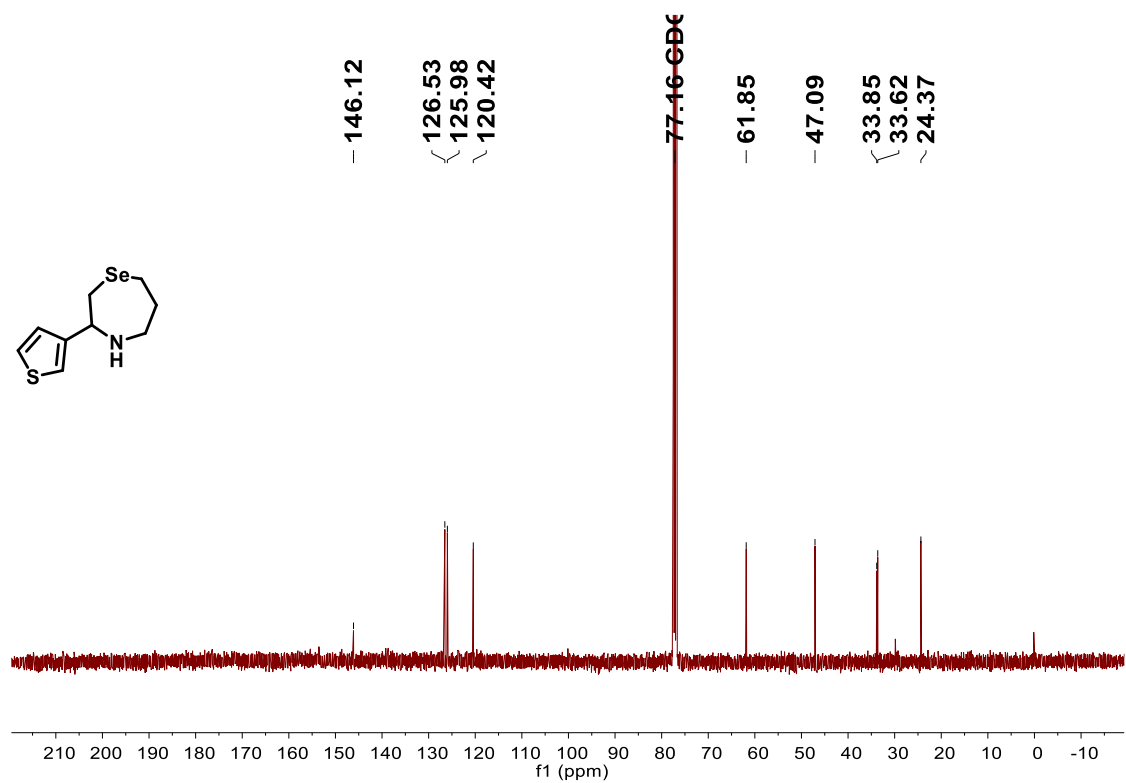



# Compound 7a

<sup>1</sup>H NMR (400 MHz, CDCl<sub>3</sub>)

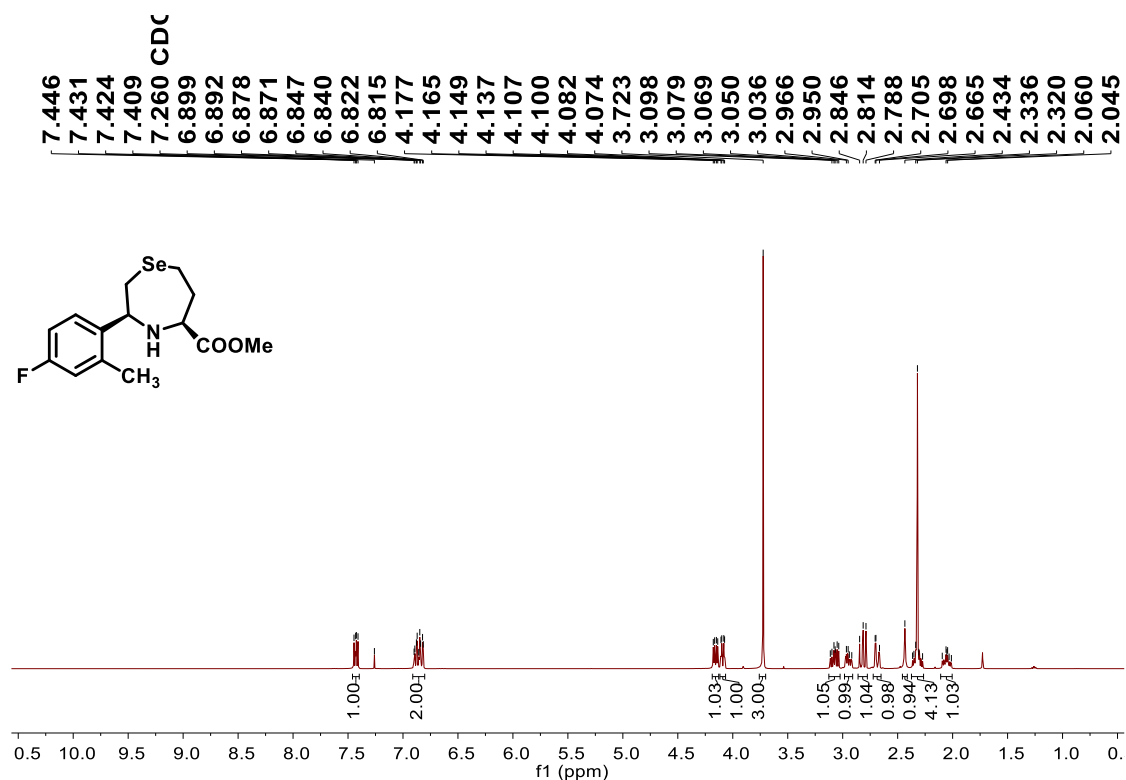

<sup>13</sup>C NMR (101 MHz, CDCl<sub>3</sub>)

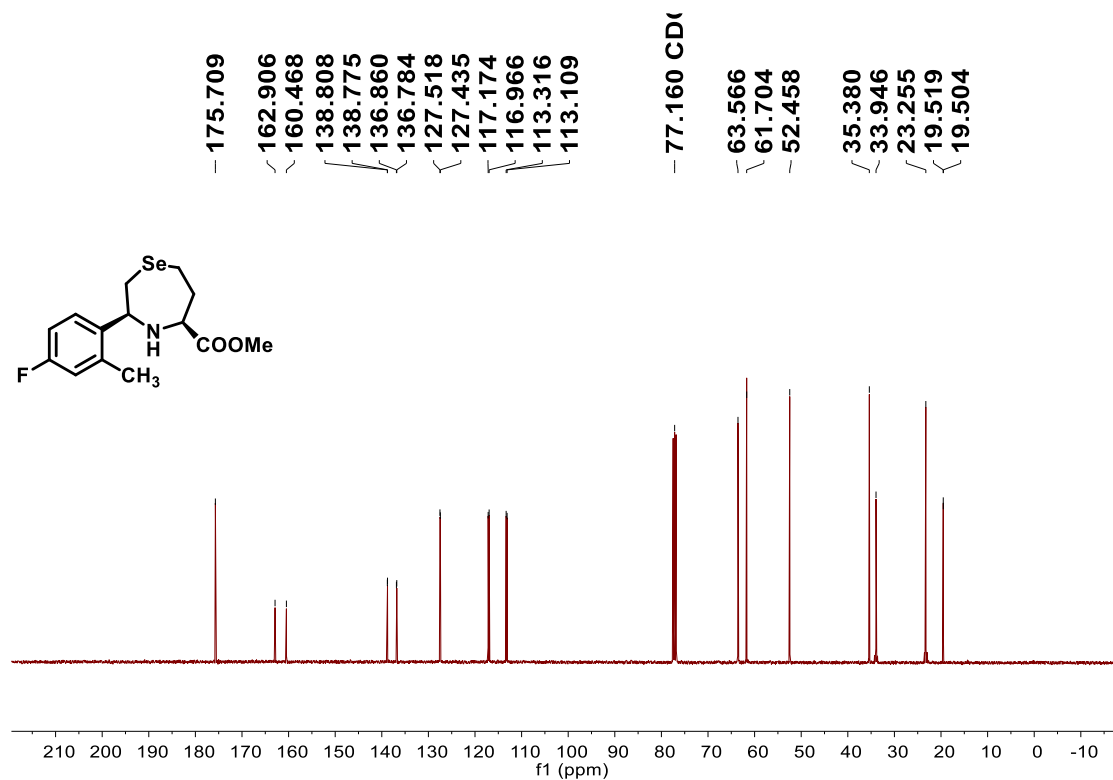



$^{19}\text{F}$  NMR (376 MHz,  $\text{CDCl}_3$ )

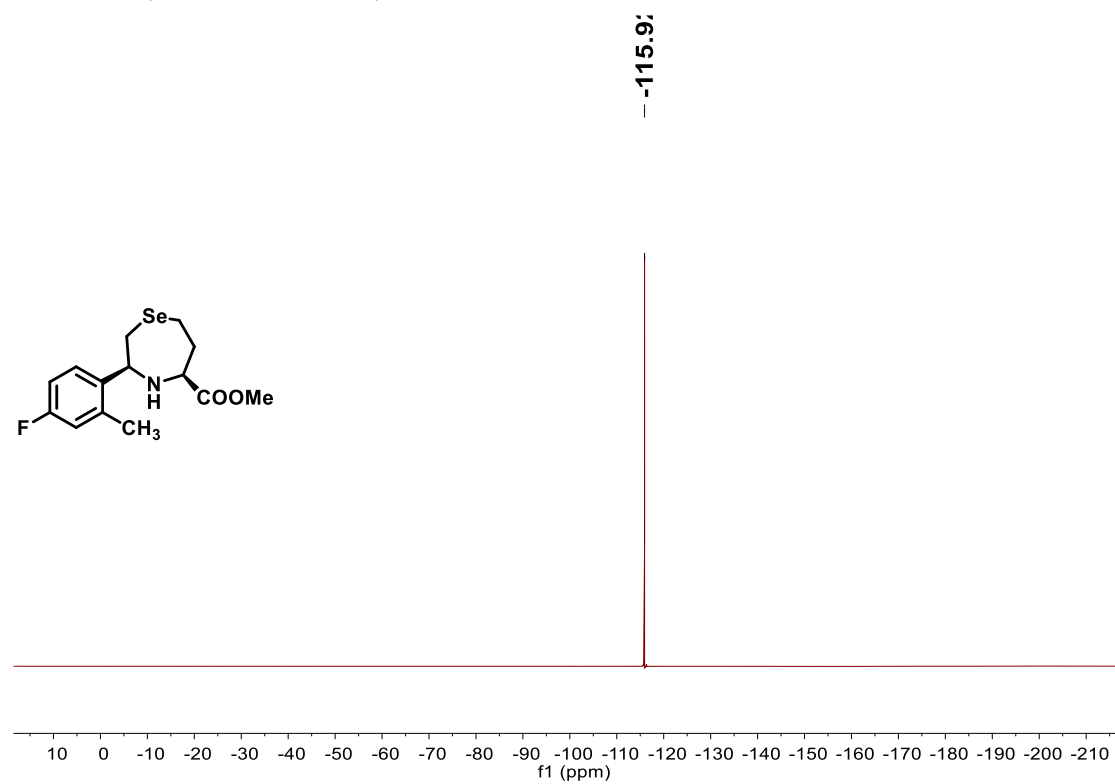



# Compound 7b

$^1\text{H}$  NMR (400 MHz,  $\text{CDCl}_3$ )

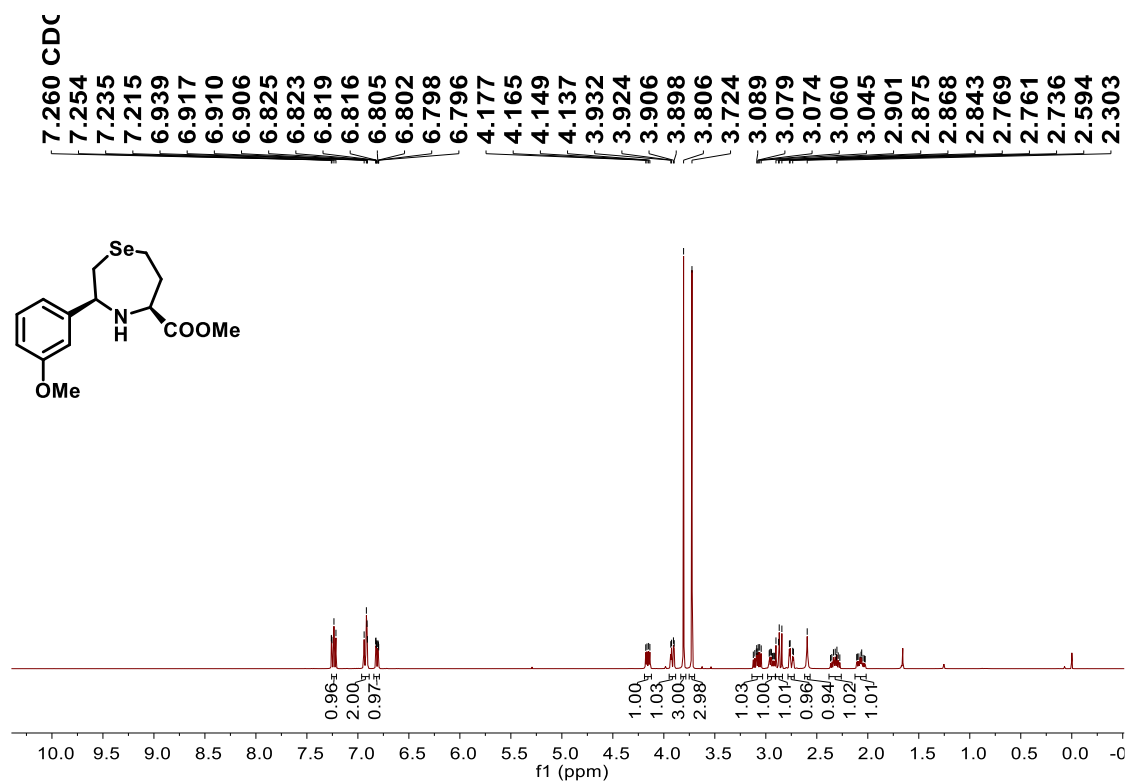

$^{13}\text{C}$  NMR (101 MHz,  $\text{CDCl}_3$ )

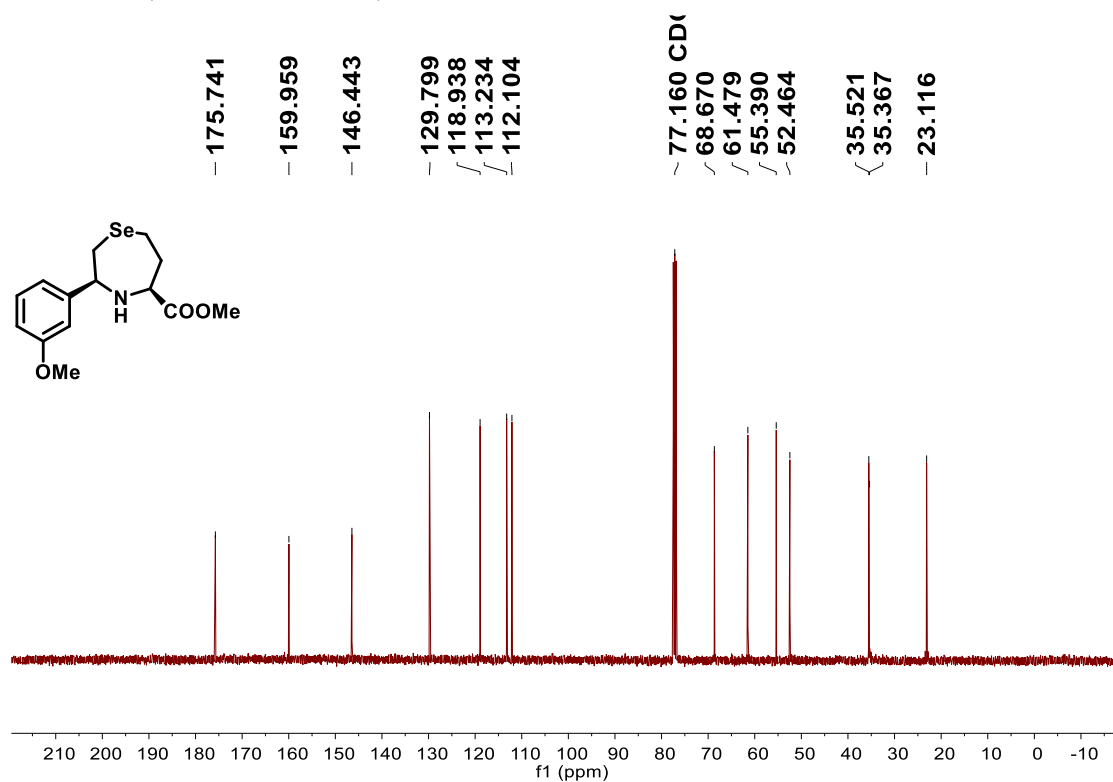



# Compound 7c

$^1\text{H}$  NMR (400 MHz,  $\text{CDCl}_3$ )

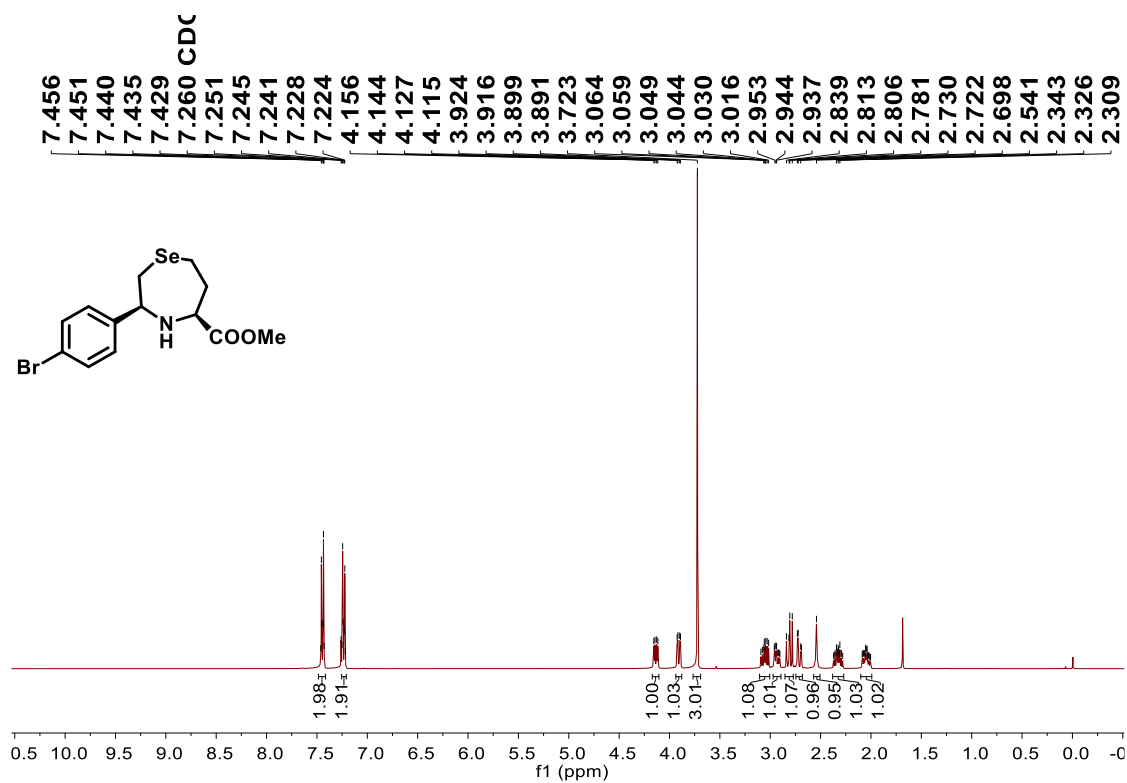

$^{13}\text{C}$  NMR (101 MHz,  $\text{CDCl}_3$ )

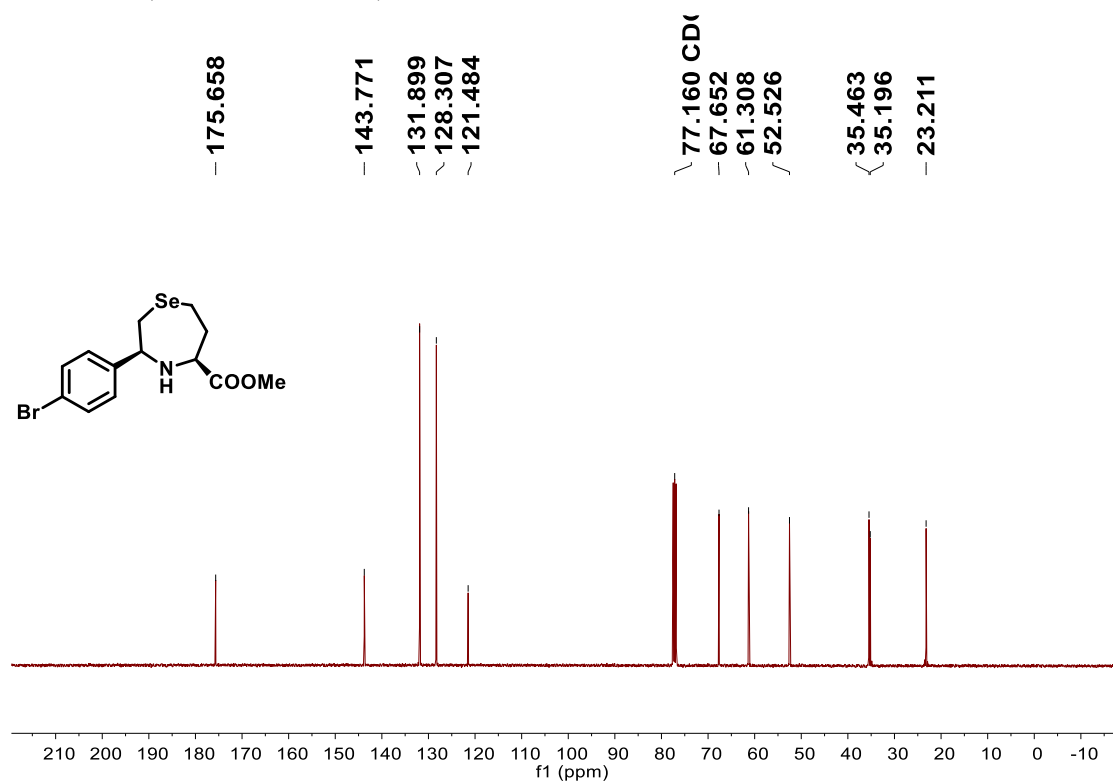



# NOESY

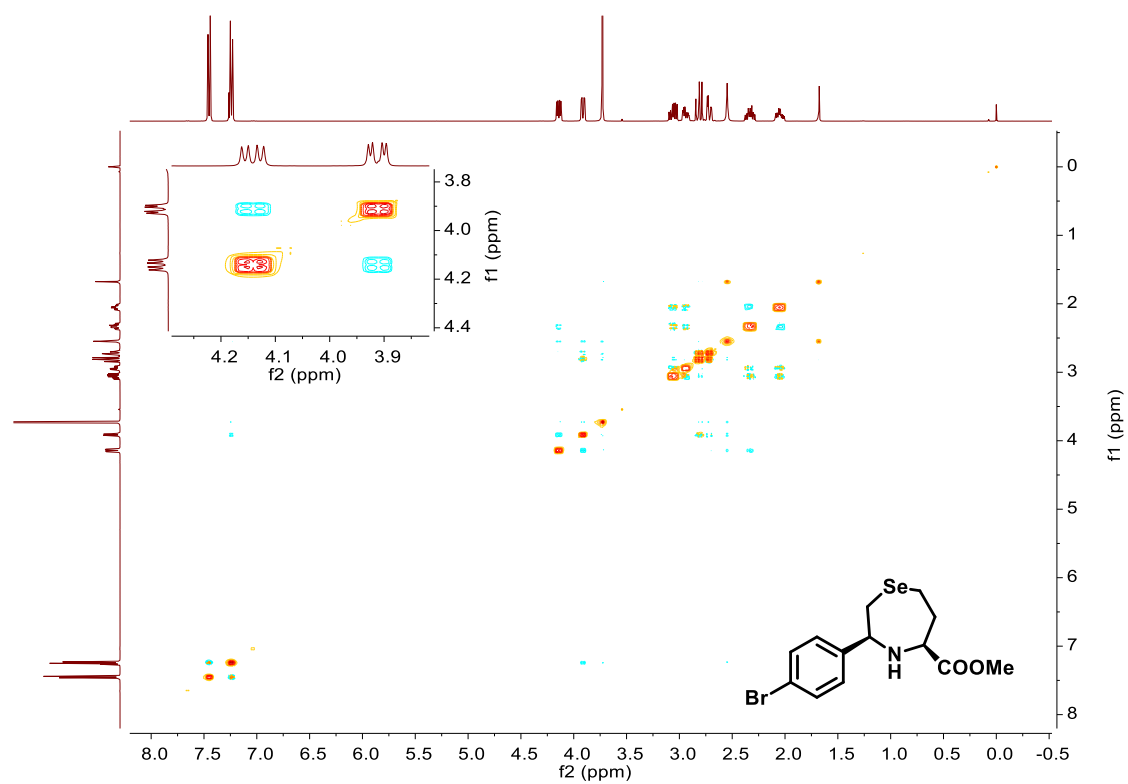



# Compound 7d

$^1\text{H}$  NMR (400 MHz,  $\text{CDCl}_3$ )

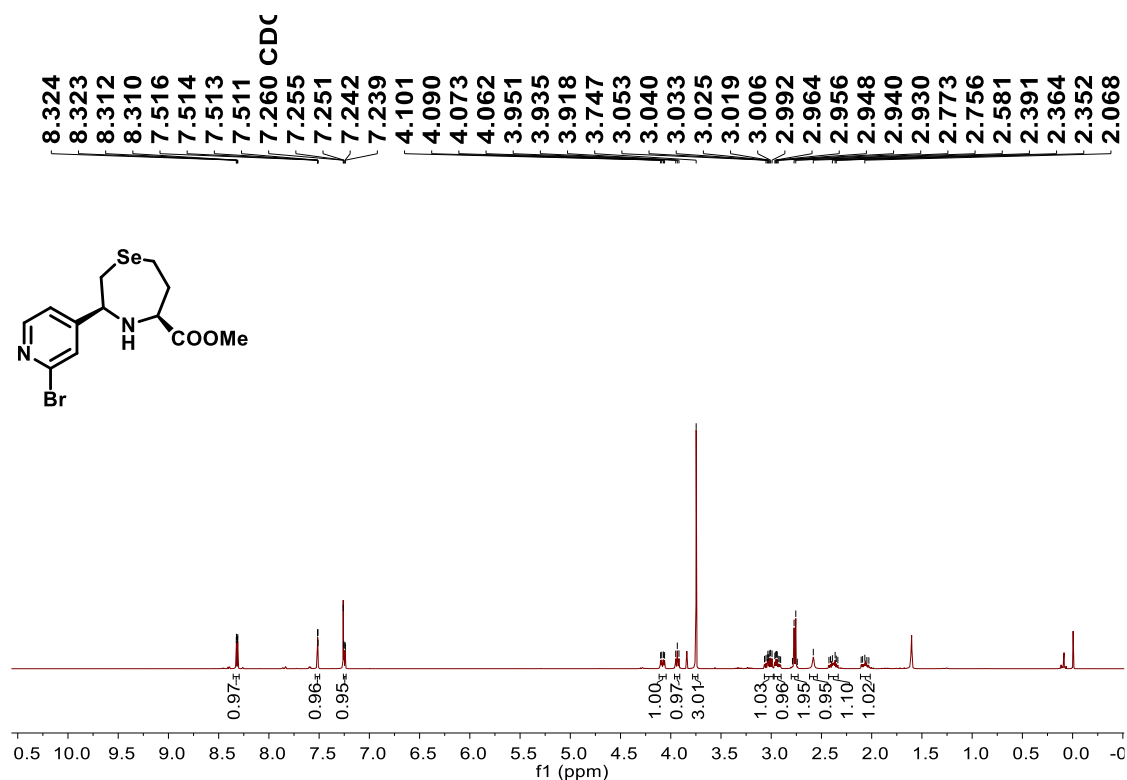

$^{13}\text{C}$  NMR (101 MHz,  $\text{CDCl}_3$ )

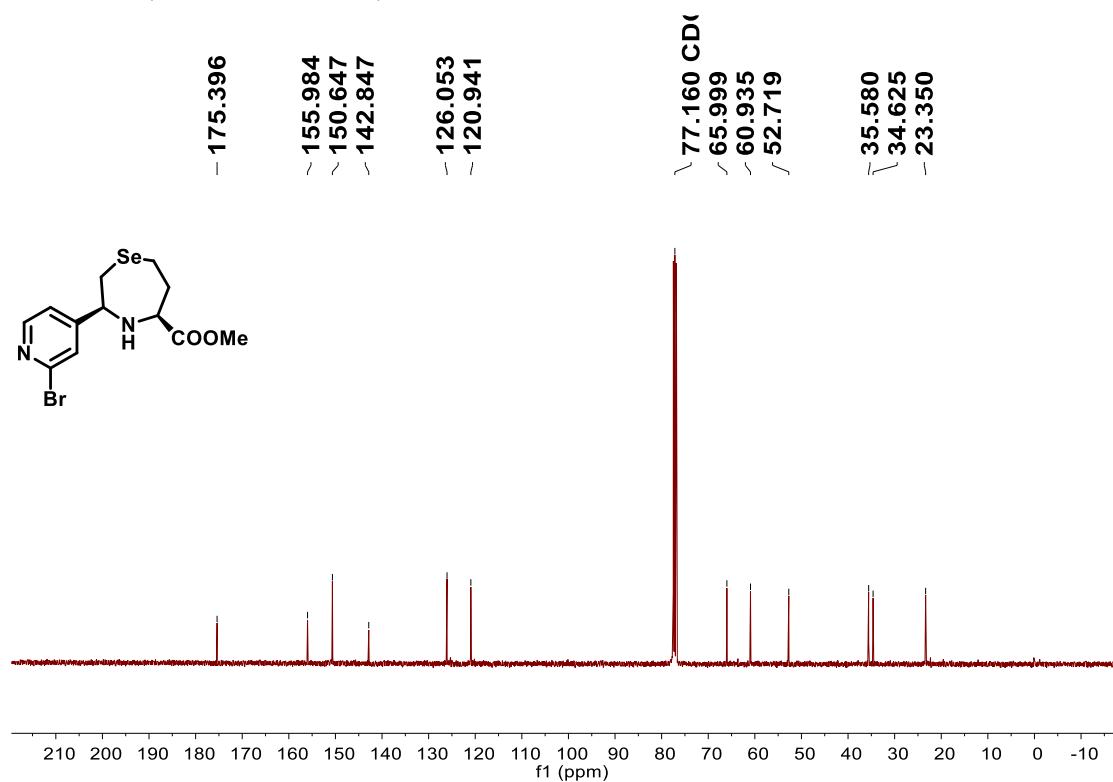



# Compound 8a

<sup>1</sup>H NMR (400 MHz, CDCl<sub>3</sub>)

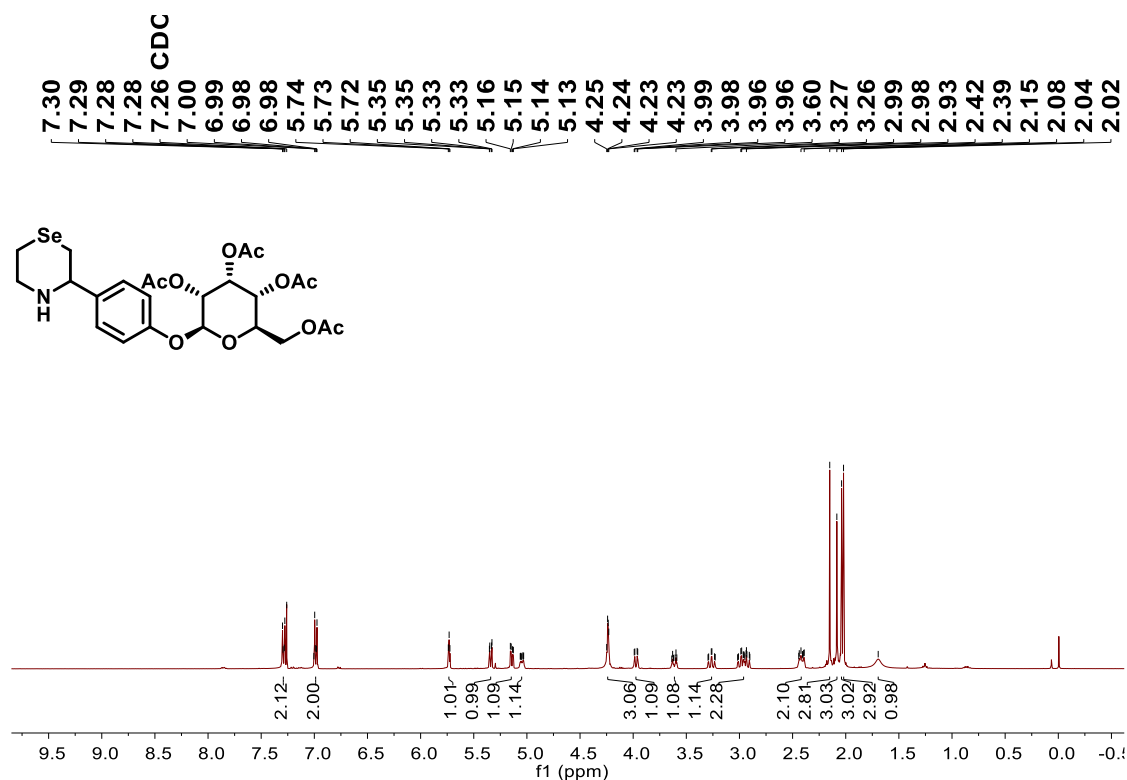

<sup>13</sup>C NMR (101 MHz, CDCl<sub>3</sub>)

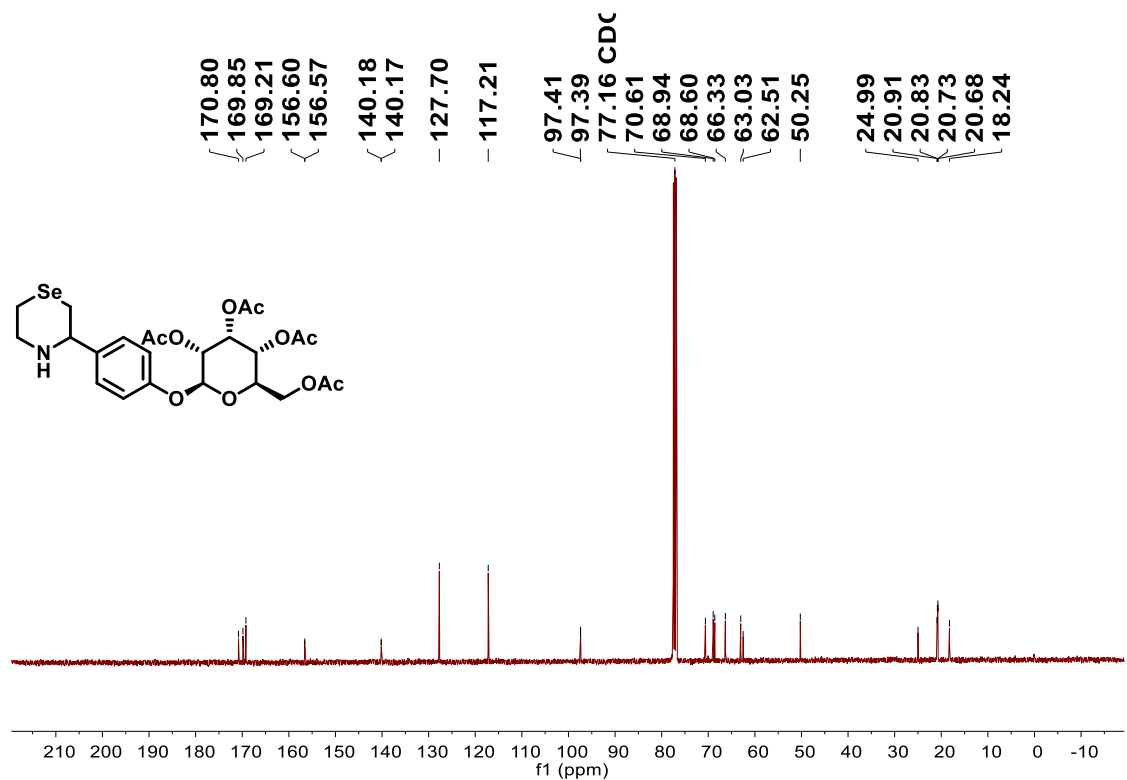



# Compound 8b

$^1\text{H}$  NMR (400 MHz,  $\text{CDCl}_3$ )

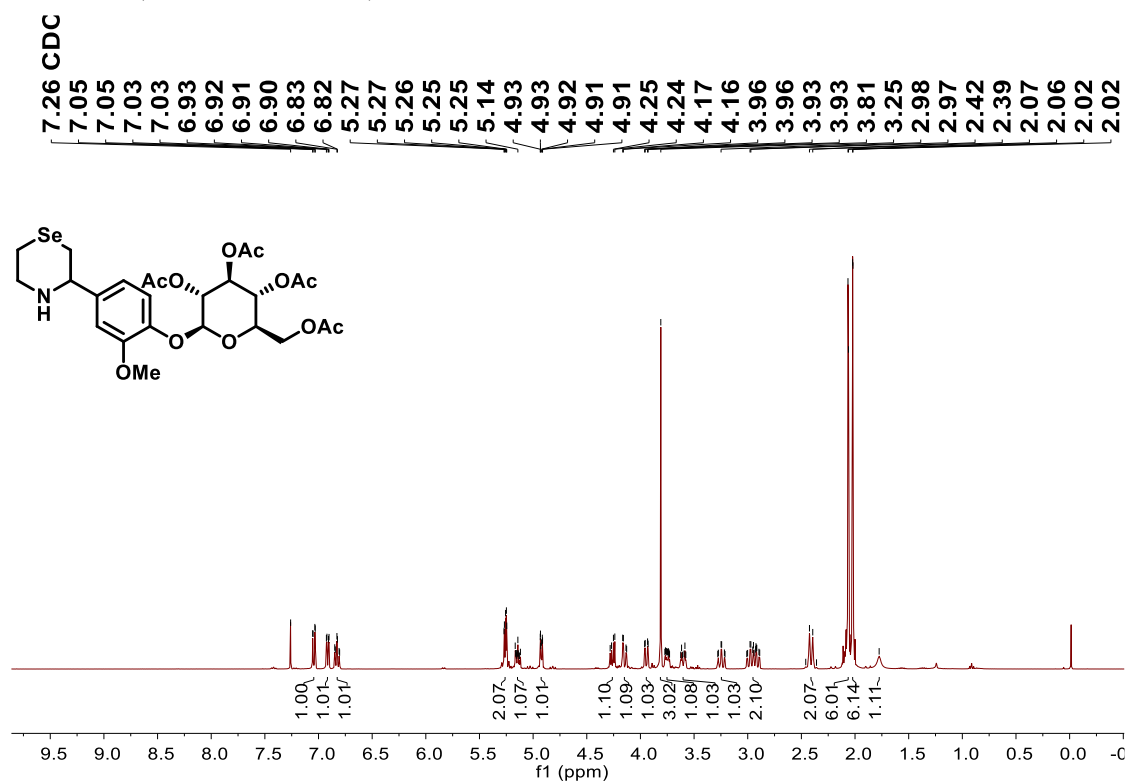

$^{13}\text{C}$  NMR (101 MHz,  $\text{CDCl}_3$ )

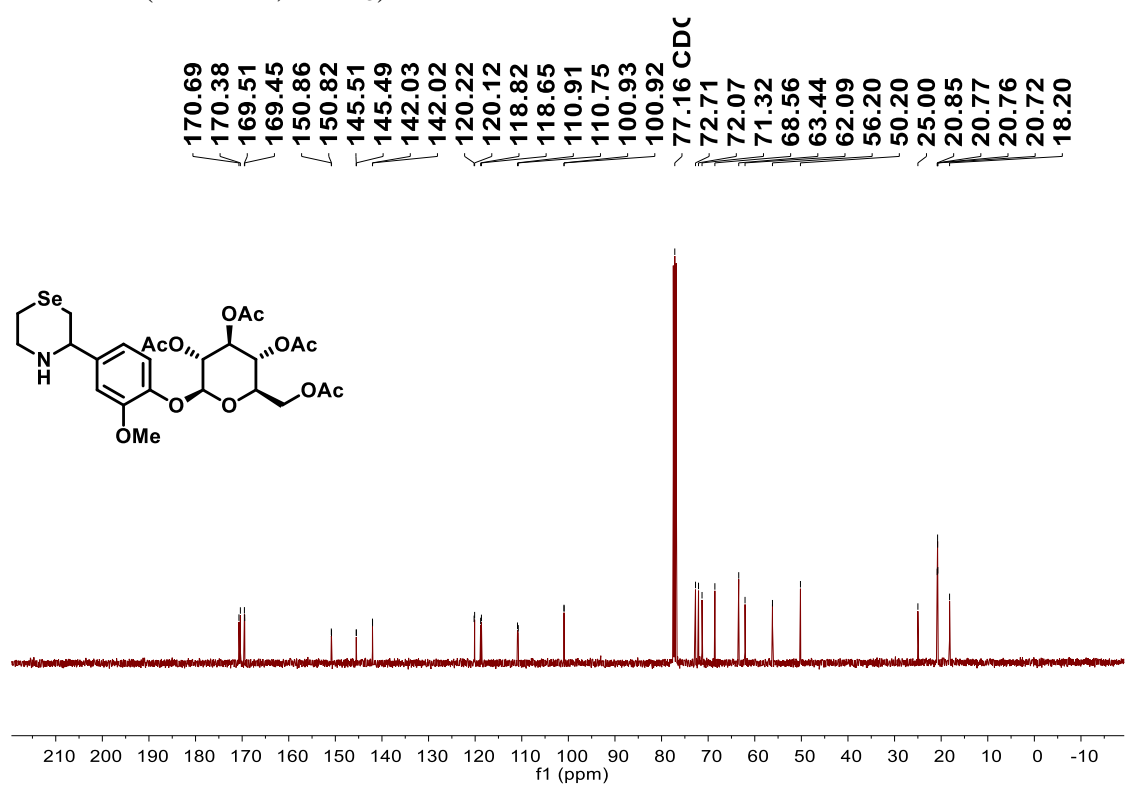



# Compound 8c

$^1\text{H}$  NMR (400 MHz,  $\text{CDCl}_3$ )

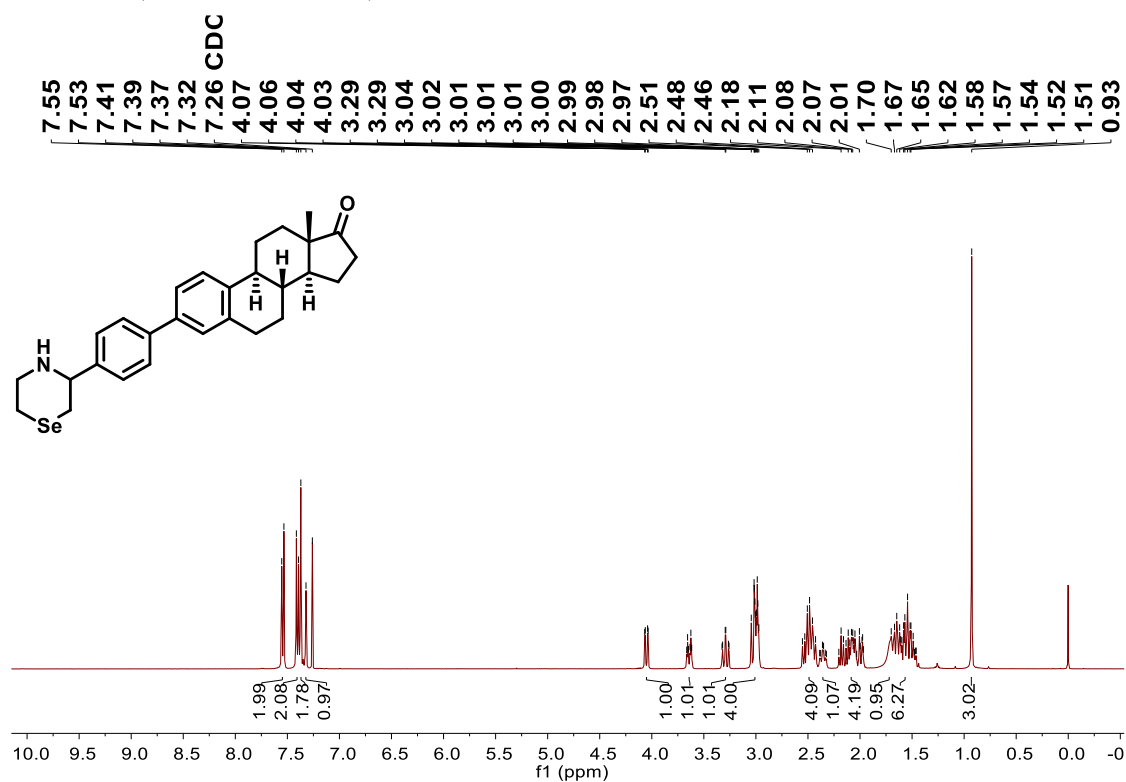

$^{13}\text{C}$  NMR (101 MHz,  $\text{CDCl}_3$ )

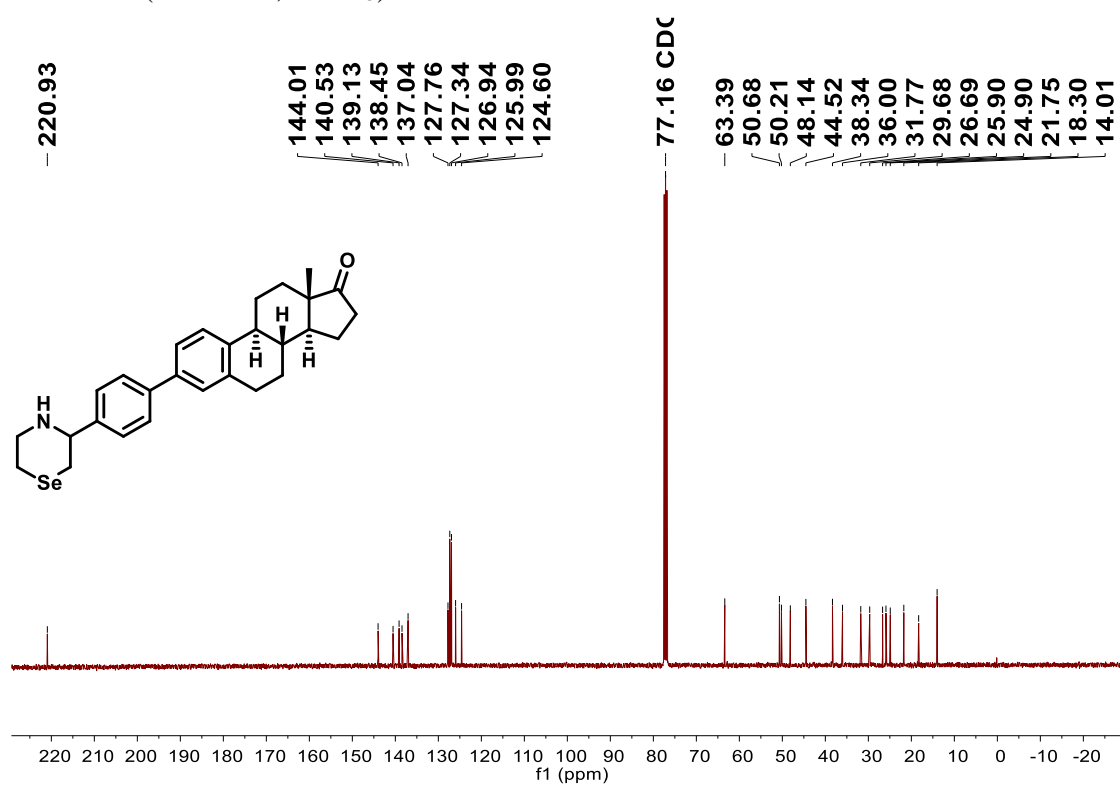



# Compound 8d

$^1\text{H}$  NMR (400 MHz,  $\text{CDCl}_3$ )

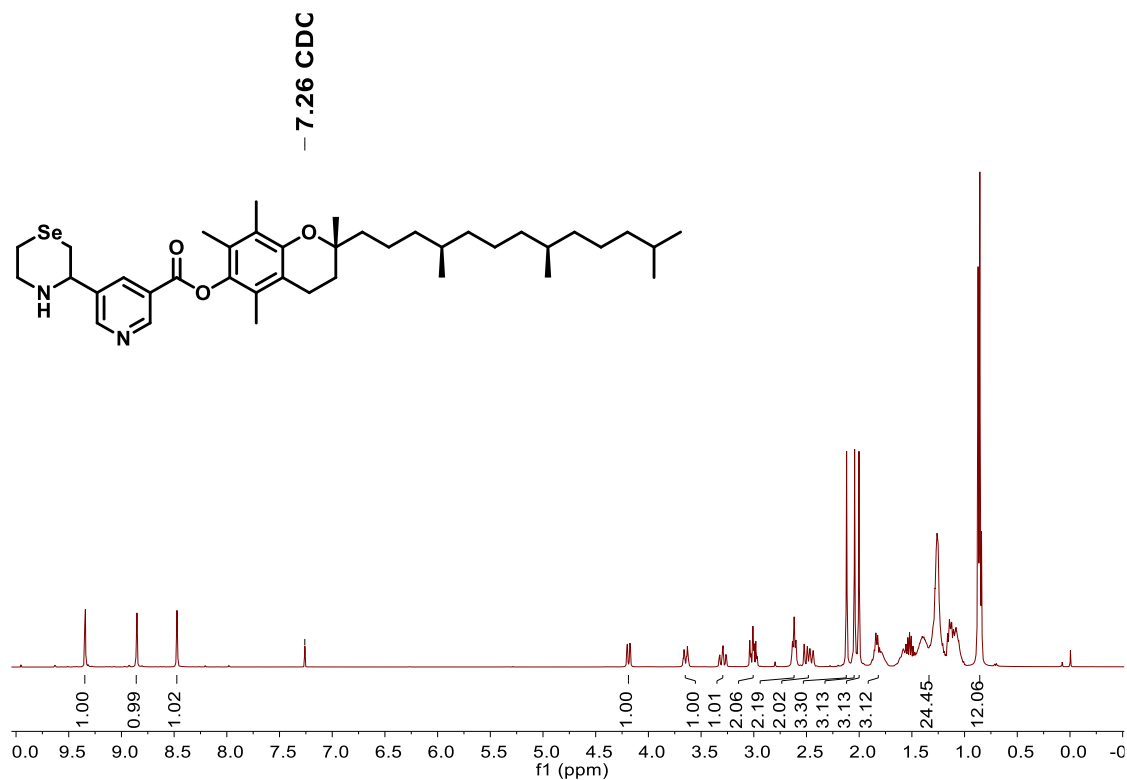

$^{13}\text{C}$  NMR (101 MHz,  $\text{CDCl}_3$ )

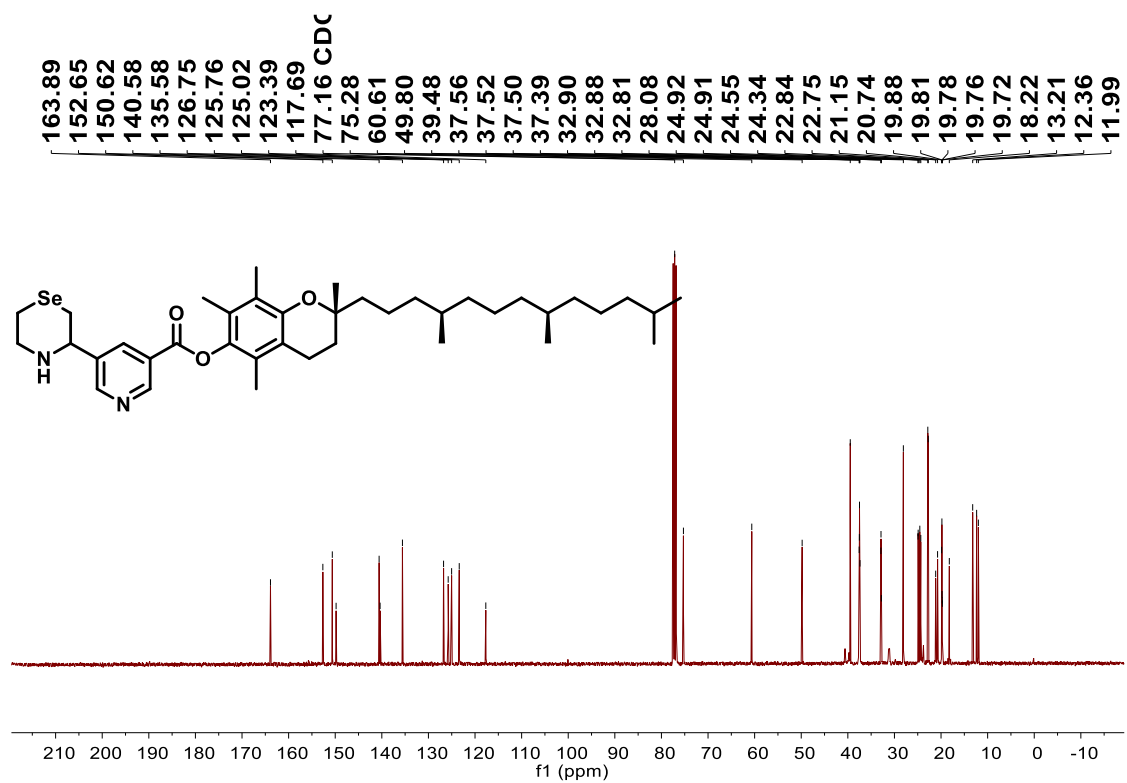



## 11. HRMS Data

### Compound Seleno-SLAP 1

#### Acquisition Parameter

|             |                                           |                       |                      |
|-------------|-------------------------------------------|-----------------------|----------------------|
| Method:     | MS-MS.m                                   | Acquisition Date:     | 1/4/2019 11:49:44 AM |
| File Name:  | D:\Data\YSY\20190104\Z38_P1-B-1_01_8214.d | Operator:             | Shuyang Yang / XZ    |
| Source Type | ESI                                       | Ion Polarity          | Positive             |
| Focus       | Active                                    | Set Capillary         | 3500 V               |
| Scan Begin  | 50 m/z                                    | Set End Plate Offset  | -500 V               |
| Scan End    | 2800 m/z                                  | Set Collision Cell RF | 200.0 Vpp            |
|             |                                           | Set Nebulizer         | 0.8 Bar              |
|             |                                           | Set Dry Heater        | 200 °C               |
|             |                                           | Set Dry Gas           | 4.0 l/min            |
|             |                                           | Set Divert Valve      | Source               |

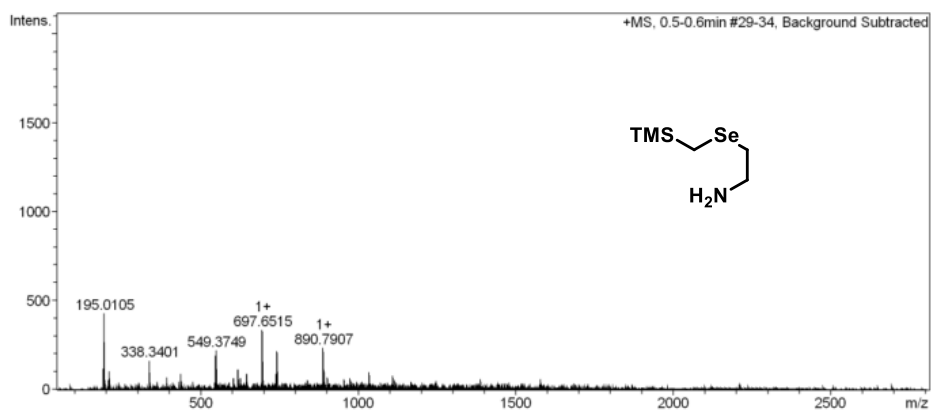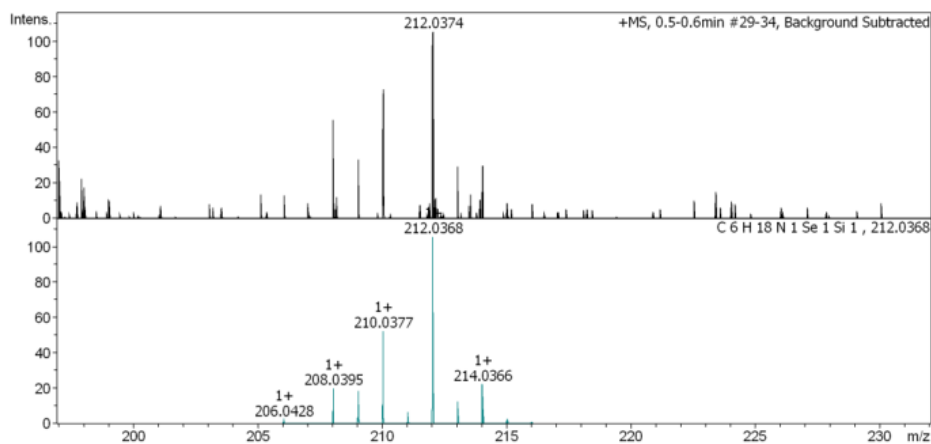



Evaluation Spectra / Validation Formula:

| Meas. m/z  | # | Ion Formula | m/z        | Adduct | err [mDa] | err [ppm] | mSigma | N-Rule | rdb  | e <sup>-</sup> Conf | Score |
|------------|---|-------------|------------|--------|-----------|-----------|--------|--------|------|---------------------|-------|
| 212.037419 | 1 | C6H18NSeSi  | 212.036801 | M+H    | -0.6      | -2.9      | 823.3  | ok     | -0.5 | even                | -1.#J |

Calibration Info:

Date: 1/8/2019 4:06:33 PM  
Polarity: Positive  
Calibration spectrum: +MS, 0.1-0.2min #7-10: Scan  
Reference mass list: ESI: Tuning Mix ES-TOF\_140 (ESI) (pos)  
Calibration mode: Quadratic

| Reference m/z | Resulting m/z | Intensity | Error [ppm] |
|---------------|---------------|-----------|-------------|
| 118.0863      |               |           |             |
| 322.0481      |               |           |             |
| 622.0290      |               |           |             |
| 922.0098      | 922.0112      | 417       | 1.491       |
| 1221.9906     |               |           |             |
| 1521.9715     | 1521.9688     | 6142      | -1.762      |
| 1821.9523     |               |           |             |
| 2121.9332     | 2121.9345     | 1612      | 0.653       |
| 2421.9140     |               |           |             |
| 2721.8948     |               |           |             |
| 140.0682      | 140.0681      | 897       | -0.558      |

Standard deviation: 2.673

Mass List:

| #  | m/z      | Res.  | S/N      | I %   | FWHM   |
|----|----------|-------|----------|-------|--------|
| 1  | 193.0116 | 11060 | 70774.7  | 28.0  | 0.0175 |
| 2  | 195.0105 | 14800 | 251477.8 | 100.0 | 0.0132 |
| 3  | 212.0374 | 10776 | 58501.7  | 24.4  | 0.0197 |
| 4  | 338.3401 | 10098 | 44566.7  | 37.8  | 0.0335 |
| 5  | 547.3732 | 14709 | 15389.7  | 25.4  | 0.0372 |
| 6  | 548.5034 | 22226 | 26627.7  | 44.1  | 0.0247 |
| 7  | 549.3749 | 10625 | 31024.1  | 51.5  | 0.0517 |
| 8  | 619.5263 | 17714 | 14661.1  | 26.2  | 0.0350 |
| 9  | 697.6515 | 9533  | 38244.0  | 78.2  | 0.0732 |
| 10 | 742.5075 | 13522 | 21119.7  | 50.5  | 0.0549 |
| 11 | 744.5119 | 29708 | 12882.5  | 31.2  | 0.0251 |
| 12 | 890.7907 | 13064 | 9507.2   | 54.7  | 0.0682 |
| 13 | 892.8006 | 23390 | 4011.9   | 23.3  | 0.0382 |

  

| #  | m/z      | Res.  | S/N | I %   | FWHM   |
|----|----------|-------|-----|-------|--------|
| 1  | 206.0428 | 10472 |     | 1.8   | 0.0197 |
| 2  | 207.0461 | 10523 |     | 0.2   | 0.0197 |
| 3  | 208.0395 | 10573 |     | 18.6  | 0.0197 |
| 4  | 209.0403 | 10624 |     | 17.3  | 0.0197 |
| 5  | 210.0377 | 10675 |     | 49.6  | 0.0197 |
| 6  | 211.0390 | 10726 |     | 6.3   | 0.0197 |
| 7  | 212.0368 | 10776 |     | 100.0 | 0.0197 |
| 8  | 213.0384 | 10827 |     | 12.0  | 0.0197 |
| 9  | 214.0366 | 10878 |     | 21.1  | 0.0197 |
| 10 | 215.0385 | 10929 |     | 2.3   | 0.0197 |
| 11 | 216.0338 | 10980 |     | 0.7   | 0.0197 |



# Compound 13

D:\IAC2020\...\QEH001164-ZG-14

08/17/20 18:51:28

QEH001164-ZG-14 #11-27 RT: 0.11-0.24 AV: 8 NL: 2.11E8

T: FTMS + p ESI Full ms [100.0000-1000.0000]

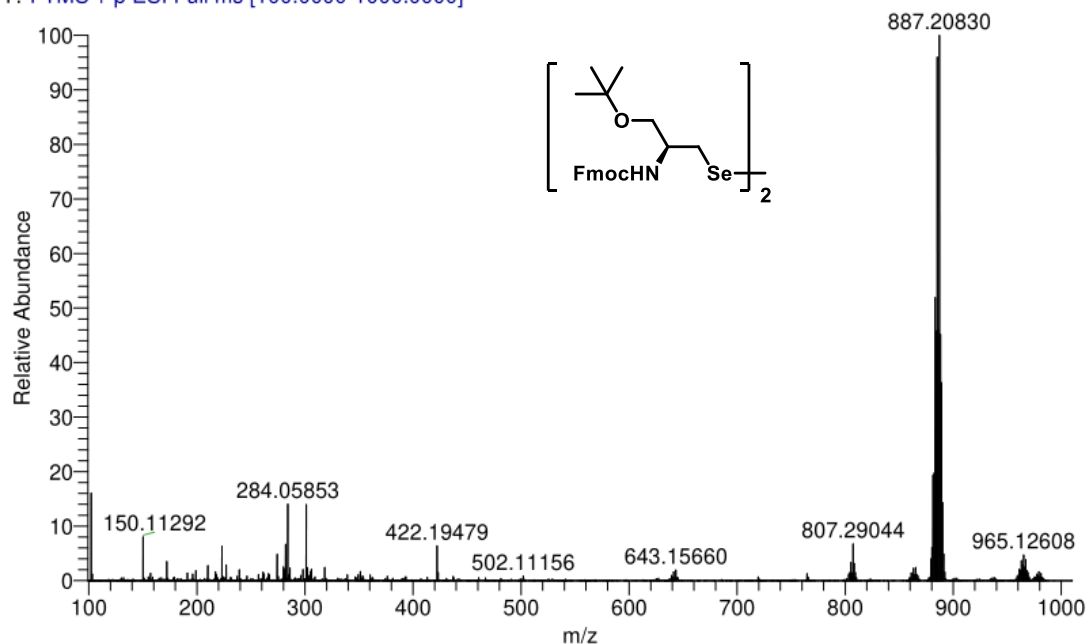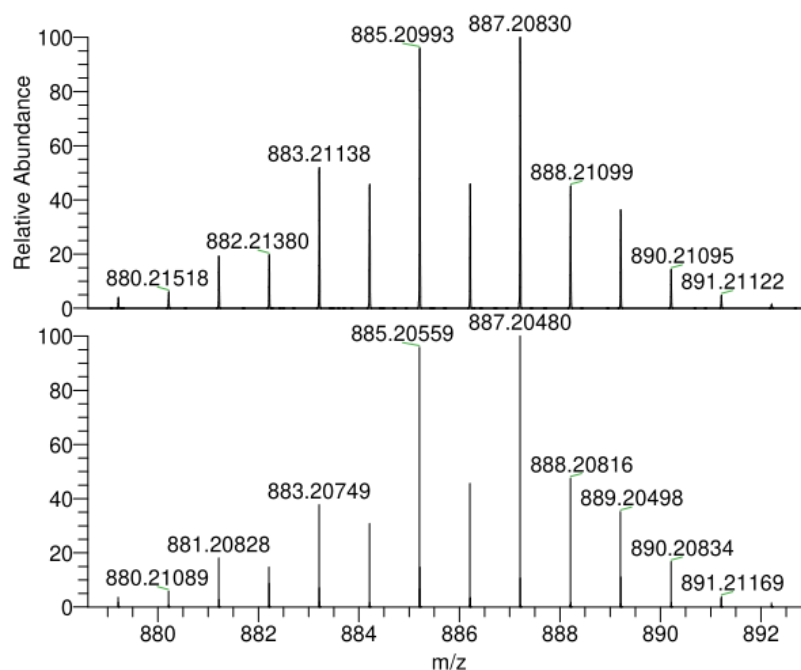

NL:  
2.11E8  
QEH001164-ZG-14#11-  
27 RT: 0.11-0.24 AV: 8  
T: FTMS + p ESI Full ms  
[100.0000-1000.0000]

NL:  
1.49E5  
C<sub>44</sub> H<sub>52</sub> N<sub>2</sub> O<sub>6</sub> Se<sub>2</sub> +Na:  
C<sub>44</sub> H<sub>52</sub> N<sub>2</sub> O<sub>6</sub> Se<sub>2</sub> Na<sub>1</sub>  
pa Chrg 1



## Compound Seleno-SLAP 2

D:\IAC2020\...\QEH001164-ZG-11

08/17/20 18:34:04

QEH001164-ZG-11 #9-36 RT: 0.09-0.34 AV: 14 NL: 2.71E9

T: FTMS + p ESI Full ms [100.0000-1000.0000]

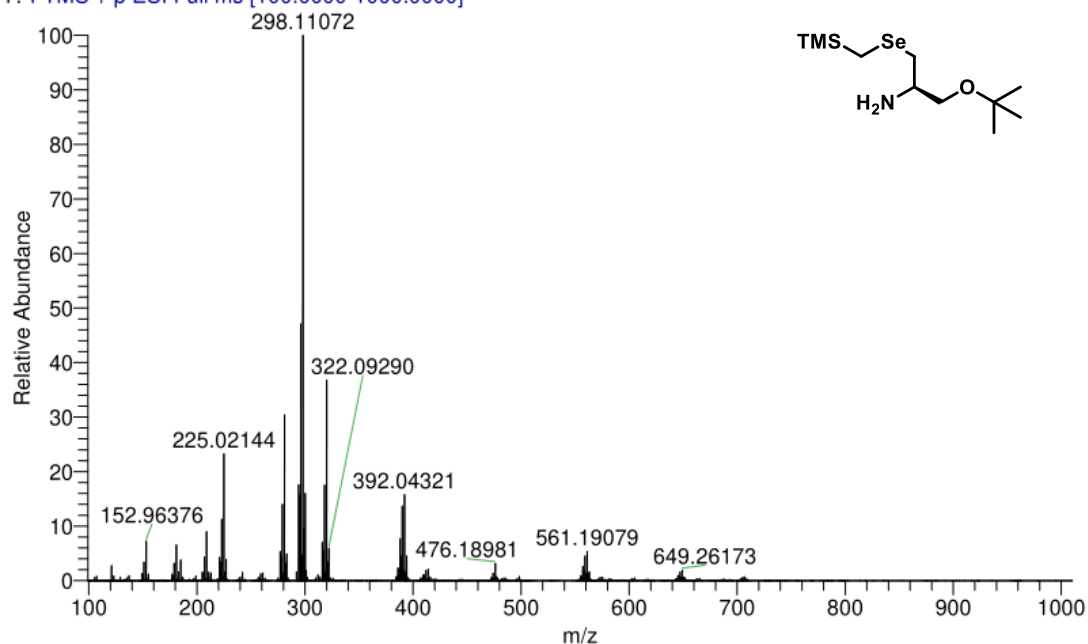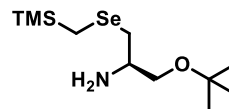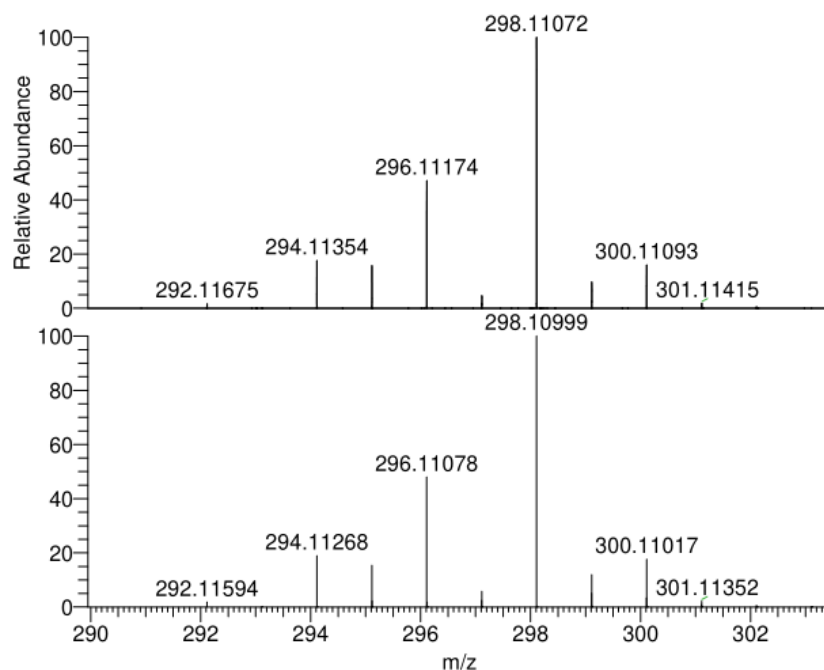

NL:  
2.71E9  
QEH001164-ZG-11#9-  
36 RT: 0.09-0.34 AV:  
14 T: FTMS + p ESI Full  
ms  
[100.0000-1000.0000]

NL:  
4.03E5  
C<sub>11</sub> H<sub>27</sub> NOSeSi +H:  
C<sub>11</sub> H<sub>28</sub> N<sub>1</sub> O<sub>1</sub> Se<sub>1</sub> Si<sub>1</sub>  
pa Chrg 1



# Compound Seleno-SLAP 3

D:\IAC2020\...\QEH001164-ZG-12

08/17/20 18:39:52

QEH001164-ZG-12 #12-37 RT: 0.11-0.34 AV: 13 NL: 5.57E8

T: FTMS + p ESI Full ms [100.0000-1000.0000]

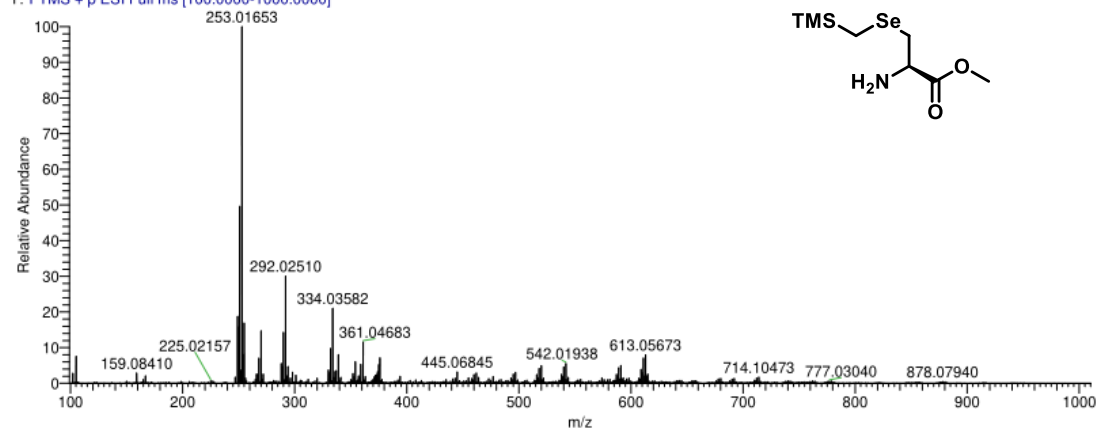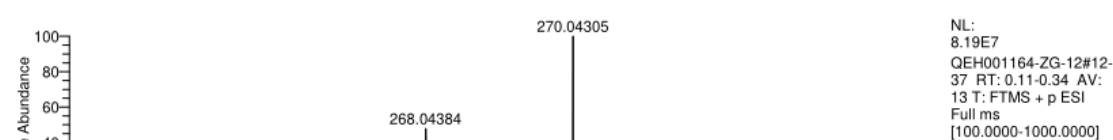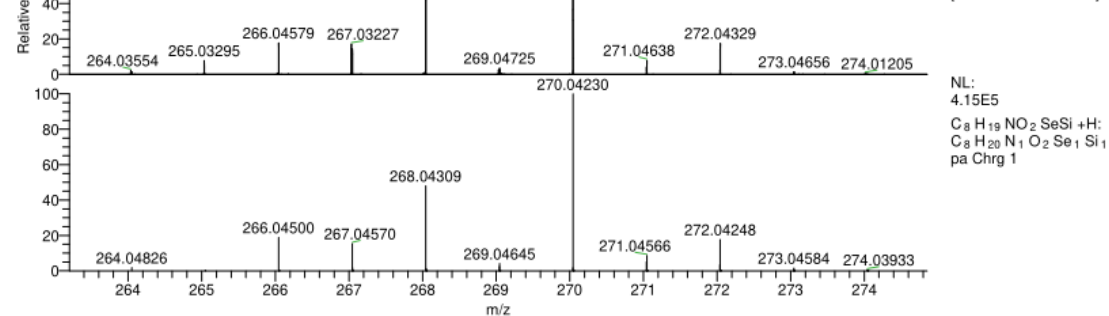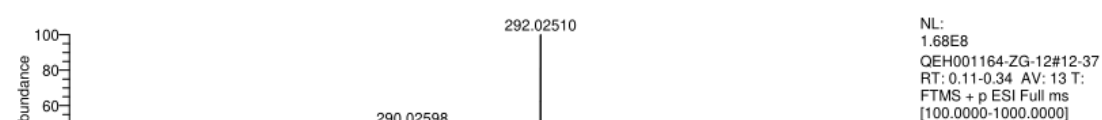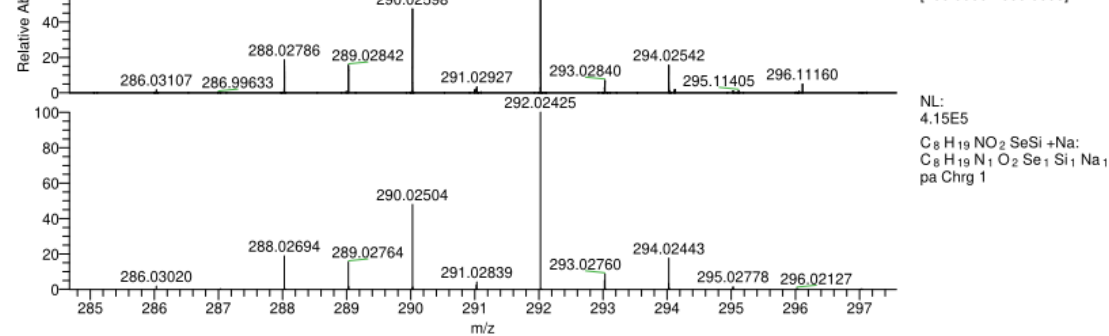



# Compound 16

RAJAVEL/ZHOU GUAN

|             |                        |                       |                     |
|-------------|------------------------|-----------------------|---------------------|
| Method:     | 20190603-50_3000-pos.m | Acquisition Date:     | 6/5/2019 7:22:47 PM |
| File Name:  | D:\Data\IAC            | Operator:             | Shuyang Yang / XZ   |
| Source Type | ESI                    | Ion Polarity          | Positive            |
| Focus       | Active                 | Set Capillary         | 3500 V              |
| Scan Begin  | 50 m/z                 | Set End Plate Offset  | -500 V              |
| Scan End    | 3000 m/z               | Set Collision Cell RF | 600.0 Vpp           |
|             |                        | Set Nebulizer         | 0.3 Bar             |
|             |                        | Set Dry Heater        | 180 °C              |
|             |                        | Set Dry Gas           | 4.0 l/min           |
|             |                        | Set Divert Valve      | Source              |

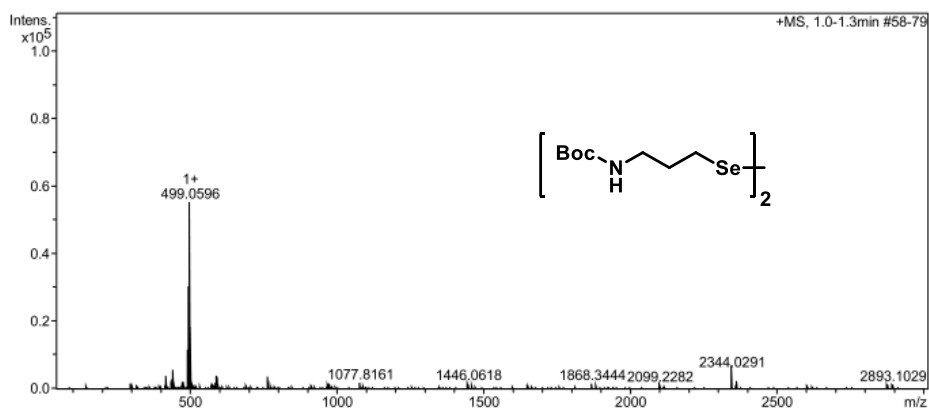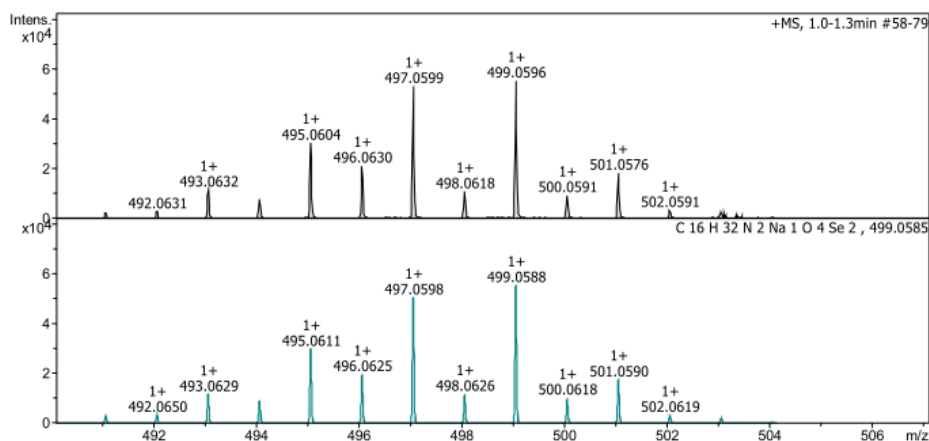



## Evaluation Spectra / Validation Formula:

| Meas. m/z  | # | Ion Formula     | Score | m/z        | err [mDa] | err [ppm] | mSigma | rdB | e <sup>-</sup> Conf | N-Rule | Adduct |
|------------|---|-----------------|-------|------------|-----------|-----------|--------|-----|---------------------|--------|--------|
| 499.059585 | 1 | C16H32N2NaO4Se2 | 92.84 | 499.058807 | 0.8       | 1.6       | 17.9   | 1.5 | even                | ok     | M+Na   |

## Calibration Info:

Date: 6/13/2019 5:07:13 PM  
Polarity: Positive  
Calibration spectrum: +MS, 4.5-4.7min #270-278: Scan  
Reference mass list: ESI: Tuning Mix ES-TOF (ESI) (pos)  
Calibration mode: Enhanced Quadratic

| Reference m/z | Resulting m/z | Intensity | Error [ppm] |
|---------------|---------------|-----------|-------------|
| 118.0863      |               |           |             |
| 322.0481      | 322.0483      | 313       | 0.464       |
| 622.0290      | 622.0283      | 17935     | -1.094      |
| 922.0098      | 922.0095      | 43046     | -0.353      |
| 1221.9906     | 1221.9918     | 56228     | 0.990       |
| 1521.9715     | 1521.9728     | 59291     | 0.872       |
| 1821.9523     | 1821.9531     | 35983     | 0.406       |
| 2121.9332     | 2121.9317     | 39186     | -0.669      |
| 2421.9140     | 2421.9085     | 9441      | -2.249      |
| 2721.8948     | 2721.8993     | 1902      | 1.633       |

Standard deviation: 1.572

## Mass List:

| #  | m/z       | Res.  | S/N    | I %   | FWHM   |
|----|-----------|-------|--------|-------|--------|
| 1  | 296.9531  | 23533 | 169.1  | 2.4   | 0.0126 |
| 2  | 417.1421  | 11870 | 155.1  | 3.2   | 0.0351 |
| 3  | 419.1410  | 13000 | 340.6  | 7.2   | 0.0322 |
| 4  | 438.9983  | 11523 | 228.5  | 5.1   | 0.0381 |
| 5  | 439.9976  | 12125 | 149.8  | 3.3   | 0.0363 |
| 6  | 440.9963  | 12286 | 426.4  | 9.5   | 0.0359 |
| 7  | 442.9954  | 11623 | 455.8  | 10.2  | 0.0381 |
| 8  | 444.9906  | 11611 | 180.8  | 4.0   | 0.0383 |
| 9  | 475.0757  | 12890 | 161.8  | 3.9   | 0.0369 |
| 10 | 477.0758  | 12715 | 167.3  | 4.0   | 0.0375 |
| 11 | 491.0631  | 12268 | 149.2  | 3.7   | 0.0400 |
| 12 | 492.0631  | 12198 | 205.3  | 5.1   | 0.0403 |
| 13 | 493.0632  | 13903 | 841.0  | 21.0  | 0.0355 |
| 14 | 494.0625  | 11988 | 554.5  | 13.8  | 0.0412 |
| 15 | 495.0604  | 14222 | 2191.7 | 54.9  | 0.0348 |
| 16 | 496.0630  | 14700 | 1524.5 | 38.2  | 0.0337 |
| 17 | 497.0599  | 15079 | 3831.9 | 96.1  | 0.0330 |
| 18 | 498.0618  | 12523 | 775.6  | 19.5  | 0.0398 |
| 19 | 499.0596  | 14346 | 3973.7 | 100.0 | 0.0348 |
| 20 | 500.0591  | 11729 | 657.6  | 16.6  | 0.0426 |
| 21 | 501.0576  | 13132 | 1313.0 | 33.2  | 0.0382 |
| 22 | 502.0591  | 12671 | 231.6  | 5.9   | 0.0396 |
| 23 | 503.0620  | 10378 | 191.9  | 4.9   | 0.0485 |
| 24 | 503.3702  | 30574 | 107.6  | 2.7   | 0.0165 |
| 25 | 586.9930  | 13778 | 122.5  | 3.5   | 0.0426 |
| 26 | 587.9944  | 13455 | 85.9   | 2.5   | 0.0437 |
| 27 | 588.9912  | 13774 | 201.5  | 5.8   | 0.0428 |
| 28 | 589.9928  | 12749 | 103.8  | 3.0   | 0.0463 |
| 29 | 590.9908  | 13232 | 238.1  | 6.9   | 0.0447 |
| 30 | 592.9883  | 12714 | 230.8  | 6.7   | 0.0466 |
| 31 | 597.0524  | 13553 | 87.3   | 2.5   | 0.0441 |
| 32 | 763.2246  | 36680 | 215.8  | 6.8   | 0.0208 |
| 33 | 763.5774  | 13918 | 113.1  | 3.6   | 0.0549 |
| 34 | 971.1247  | 12752 | 78.5   | 2.8   | 0.0762 |
| 35 | 973.1255  | 14160 | 87.1   | 3.1   | 0.0687 |
| 36 | 1077.8161 | 16758 | 83.5   | 3.2   | 0.0643 |
| 37 | 1446.0618 | 43917 | 64.4   | 3.0   | 0.0329 |
| 38 | 1868.3444 | 56285 | 63.8   | 3.0   | 0.0332 |
| 39 | 2344.0291 | 25739 | 325.2  | 9.9   | 0.0911 |
| 40 | 2344.6586 | 23517 | 175.0  | 5.3   | 0.0997 |
| #  | m/z       | Res.  | S/N    | I %   | FWHM   |
| 1  | 489.0671  | 14059 |        | 0.6   | 0.0348 |
| 2  | 490.0683  | 14088 |        | 0.6   | 0.0348 |
| 3  | 491.0643  | 14116 |        | 4.5   | 0.0348 |
| 4  | 492.0650  | 14145 |        | 5.7   | 0.0348 |



RAJAVEL/ZHOU GUAN

| #  | m/z      | Res.  | S/N | I %   | FWHM   |
|----|----------|-------|-----|-------|--------|
| 5  | 493.0629 | 14174 |     | 21.0  | 0.0348 |
| 6  | 494.0634 | 14203 |     | 16.1  | 0.0348 |
| 7  | 495.0611 | 14231 |     | 53.7  | 0.0348 |
| 8  | 496.0625 | 14260 |     | 35.3  | 0.0348 |
| 9  | 497.0598 | 14289 |     | 91.1  | 0.0348 |
| 10 | 498.0626 | 14318 |     | 21.0  | 0.0348 |
| 11 | 499.0588 | 14346 |     | 100.0 | 0.0348 |
| 12 | 500.0618 | 14375 |     | 18.3  | 0.0348 |
| 13 | 501.0590 | 14404 |     | 31.6  | 0.0348 |
| 14 | 502.0619 | 14433 |     | 5.6   | 0.0348 |
| 15 | 503.0600 | 14461 |     | 3.3   | 0.0348 |
| 16 | 504.0622 | 14490 |     | 0.5   | 0.0348 |



# Compound Seleno-SLAP 4

RAJAVEL/ZHOU GUAN

|             |                        |                       |                      |
|-------------|------------------------|-----------------------|----------------------|
| Method:     | 20190603-50_3000-pos.m | Acquisition Date:     | 6/6/2019 12:07:03 PM |
| File Name:  | D:\Data\IAC            | Operator:             | Shuyang Yang / XZ    |
| Source Type | ESI                    | Ion Polarity          | Positive             |
| Focus       | Active                 | Set Capillary         | 3500 V               |
| Scan Begin  | 50 m/z                 | Set End Plate Offset  | -500 V               |
| Scan End    | 3000 m/z               | Set Collision Cell RF | 600.0 Vpp            |
|             |                        | Set Nebulizer         | 0.3 Bar              |
|             |                        | Set Dry Heater        | 180 °C               |
|             |                        | Set Dry Gas           | 4.0 l/min            |
|             |                        | Set Divert Valve      | Source               |

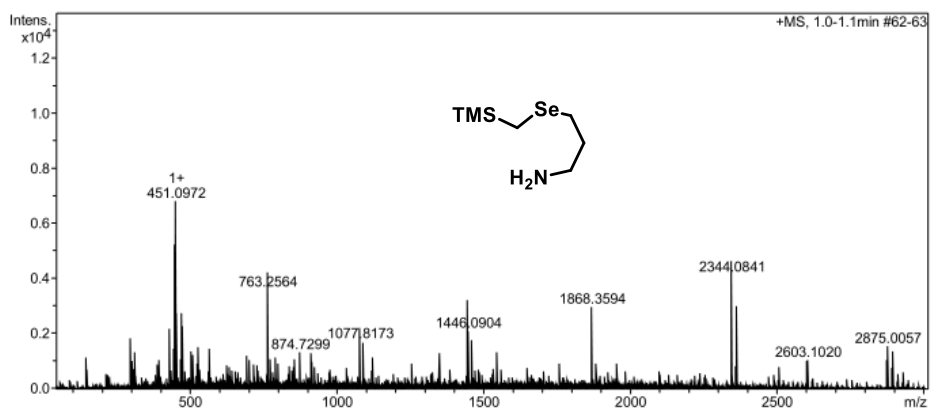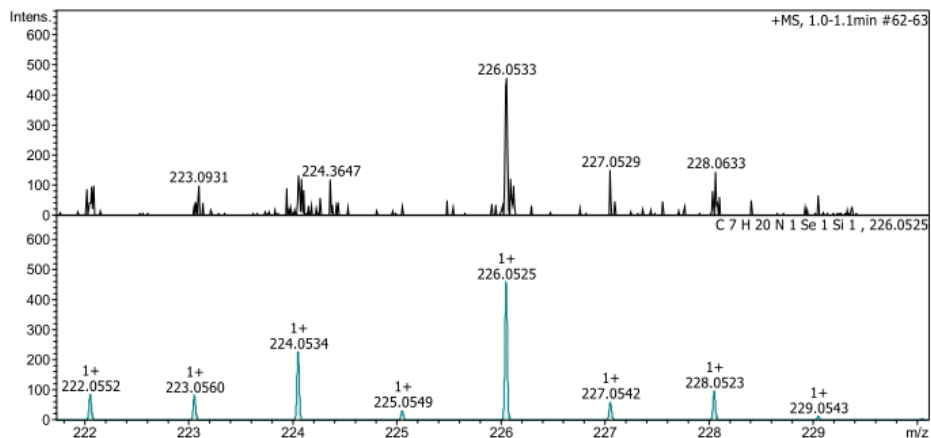



## Evaluation Spectra / Validation Formula:

| Meas. m/z  | # | Ion Formula | Score  | m/z        | err [mDa] | err [ppm] | mSigma | rdb  | e <sup>-</sup> Conf | N-Rule | Adduct |
|------------|---|-------------|--------|------------|-----------|-----------|--------|------|---------------------|--------|--------|
| 226.053317 | 1 | C7H20NSeSi  | 100.00 | 226.052455 | -0.9      | -3.8      | 200.6  | -0.5 | even                | ok     | M+H    |

## Calibration Info:

Date: 6/13/2019 5:09:05 PM  
Polarity: Positive  
Calibration spectrum: +MS, 4.5-4.7min #270-277: Scan  
Reference mass list: ESI: Tuning Mix ES-TOF (ESI) (pos)  
Calibration mode: Enhanced Quadratic

| Reference m/z | Resulting m/z | Intensity | Error [ppm] |
|---------------|---------------|-----------|-------------|
| 118.0863      |               |           |             |
| 322.0481      | 322.0481      | 377       | 0.053       |
| 622.0290      | 622.0291      | 16977     | 0.211       |
| 922.0098      | 922.0088      | 43738     | -1.046      |
| 1221.9906     | 1221.9913     | 50505     | 0.503       |
| 1521.9715     | 1521.9728     | 53030     | 0.890       |
| 1821.9523     | 1821.9522     | 36003     | -0.080      |
| 2121.9332     | 2121.9326     | 40326     | -0.244      |
| 2421.9140     | 2421.9116     | 9841      | -0.977      |
| 2721.8948     | 2721.8967     | 2350      | 0.689       |

Standard deviation: 0.885

## Mass List:

| #  | m/z       | Res.  | S/N   | I %   | FWHM   |
|----|-----------|-------|-------|-------|--------|
| 1  | 296.9610  | 21694 | 21.3  | 19.0  | 0.0137 |
| 2  | 297.1752  | 8725  | 23.7  | 21.2  | 0.0341 |
| 3  | 312.1093  | 11144 | 21.4  | 19.5  | 0.0280 |
| 4  | 430.9152  | 12782 | 33.3  | 32.0  | 0.0337 |
| 5  | 445.1021  | 13876 | 21.9  | 21.2  | 0.0321 |
| 6  | 447.0993  | 10465 | 42.5  | 41.2  | 0.0427 |
| 7  | 448.0998  | 12198 | 37.8  | 36.6  | 0.0367 |
| 8  | 449.0987  | 11774 | 79.4  | 77.0  | 0.0381 |
| 9  | 450.0975  | 15080 | 30.8  | 29.9  | 0.0298 |
| 10 | 451.0972  | 12355 | 103.0 | 100.0 | 0.0365 |
| 11 | 452.0969  | 10437 | 25.2  | 24.4  | 0.0433 |
| 12 | 453.0964  | 12998 | 41.4  | 40.2  | 0.0349 |
| 13 | 471.0811  | 16223 | 41.5  | 40.6  | 0.0290 |
| 14 | 473.0790  | 14950 | 34.1  | 33.4  | 0.0316 |
| 15 | 503.1136  | 25477 | 20.1  | 19.8  | 0.0197 |
| 16 | 503.3709  | 11653 | 18.8  | 18.5  | 0.0432 |
| 17 | 527.1107  | 12678 | 21.5  | 21.3  | 0.0416 |
| 18 | 529.1039  | 10962 | 22.7  | 22.5  | 0.0483 |
| 19 | 566.8902  | 14408 | 21.4  | 21.3  | 0.0393 |
| 20 | 693.4722  | 39974 | 17.3  | 17.6  | 0.0173 |
| 21 | 763.2564  | 21823 | 51.5  | 52.7  | 0.0350 |
| 22 | 763.5811  | 25745 | 33.2  | 34.0  | 0.0297 |
| 23 | 874.7299  | 46052 | 19.1  | 19.4  | 0.0190 |
| 24 | 874.8512  | 46505 | 17.4  | 17.6  | 0.0188 |
| 25 | 1077.4107 | 25049 | 23.5  | 23.7  | 0.0430 |
| 26 | 1077.8173 | 16669 | 25.0  | 25.2  | 0.0647 |
| 27 | 1348.4838 | 53379 | 19.5  | 19.2  | 0.0253 |
| 28 | 1348.6442 | 54858 | 19.0  | 18.7  | 0.0246 |
| 29 | 1445.6403 | 24356 | 18.8  | 18.4  | 0.0594 |
| 30 | 1446.0904 | 18309 | 31.5  | 30.9  | 0.0790 |
| 31 | 1458.9558 | 41798 | 26.8  | 26.2  | 0.0349 |
| 32 | 1546.1718 | 58384 | 20.0  | 19.5  | 0.0265 |
| 33 | 1868.3594 | 52945 | 47.4  | 43.7  | 0.0353 |
| 34 | 2344.0841 | 54052 | 76.6  | 60.6  | 0.0434 |
| 35 | 2344.6925 | 58539 | 53.2  | 42.1  | 0.0401 |
| 36 | 2360.3829 | 73417 | 28.1  | 21.9  | 0.0322 |
| 37 | 2360.8619 | 67780 | 36.4  | 28.4  | 0.0348 |
| 38 | 2361.0552 | 63741 | 56.5  | 44.0  | 0.0370 |
| 39 | 2875.0057 | 78953 | 37.0  | 22.7  | 0.0364 |
| 40 | 2893.1429 | 65544 | 32.8  | 20.1  | 0.0441 |

| # | m/z      | Res. | S/N | I %  | FWHM   |
|---|----------|------|-----|------|--------|
| 1 | 220.0584 | 8789 |     | 1.8  | 0.0250 |
| 2 | 221.0618 | 8829 |     | 0.2  | 0.0250 |
| 3 | 222.0552 | 8869 |     | 18.6 | 0.0250 |
| 4 | 223.0560 | 8909 |     | 17.5 | 0.0250 |



RAJAVEL/ZHOU GUAN

---

| #  | m/z      | Res. | S/N | I %   | FWHM   |
|----|----------|------|-----|-------|--------|
| 5  | 224.0534 | 8948 |     | 49.7  | 0.0250 |
| 6  | 225.0549 | 8988 |     | 6.9   | 0.0250 |
| 7  | 226.0525 | 9028 |     | 100.0 | 0.0250 |
| 8  | 227.0542 | 9068 |     | 13.1  | 0.0250 |
| 9  | 228.0523 | 9108 |     | 21.2  | 0.0250 |
| 10 | 229.0543 | 9148 |     | 2.6   | 0.0250 |
| 11 | 230.0495 | 9188 |     | 0.7   | 0.0250 |



# Compound Seleno-SLAP 5

D:\IAC2020\...\QEH001164-ZG-13

08/17/20 18:45:40

QEH001164-ZG-13 #9-35 RT: 0.09-0.32 AV: 13 NL: 1.68E9

T: FTMS + p ESI Full ms [100.0000-1000.0000]

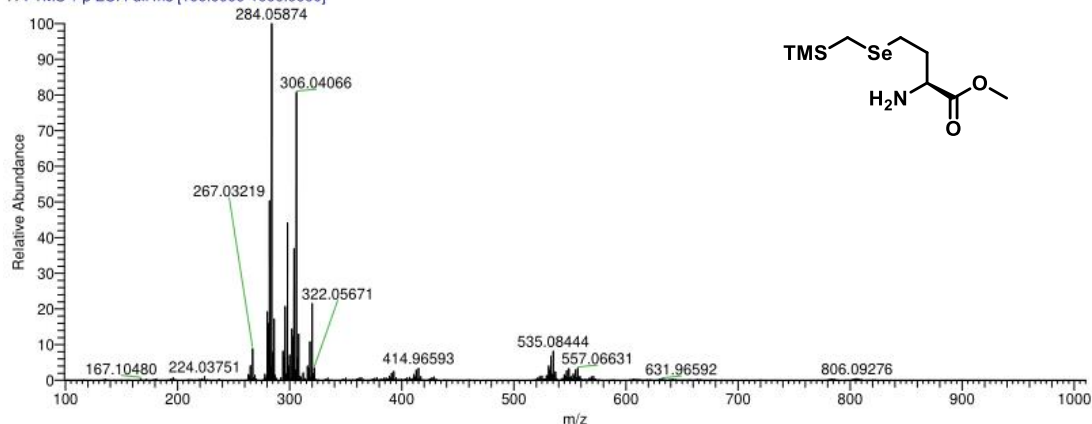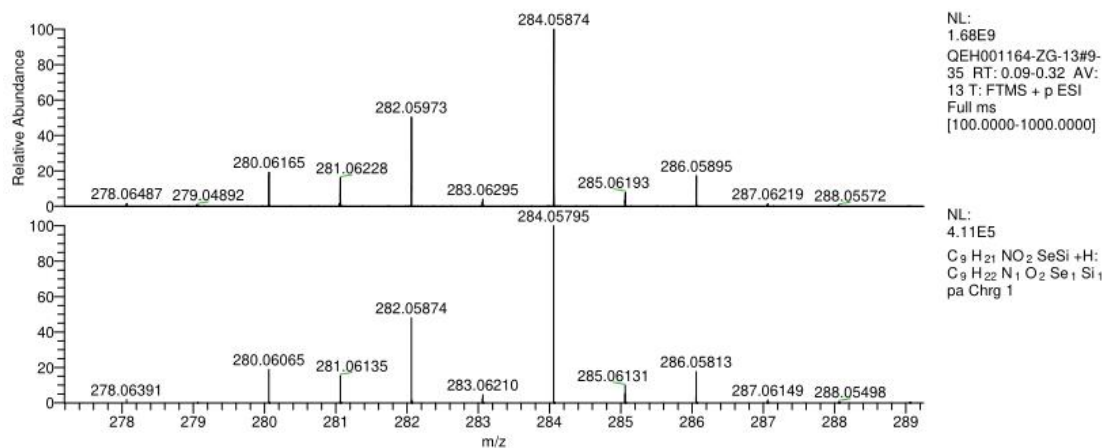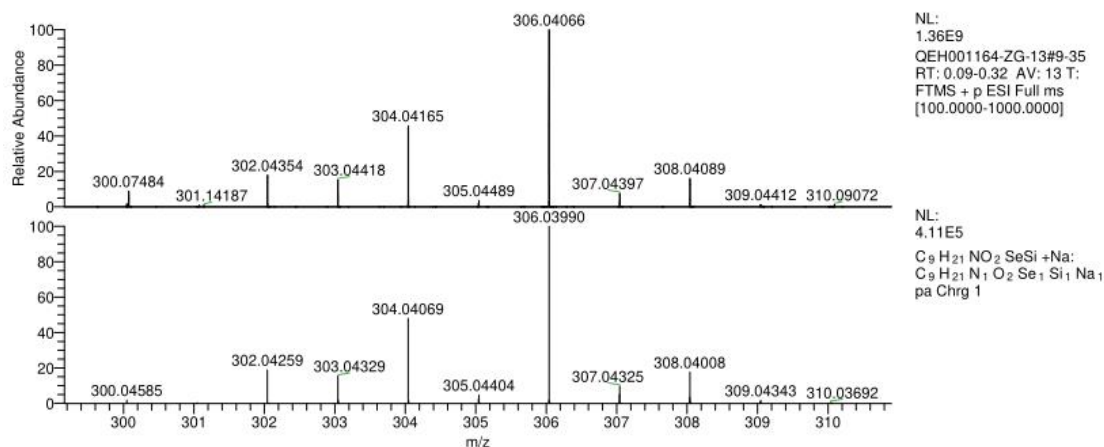



# Compound 30

RAJAVEL/ZHOU GUAN

|             |                        |                       |                     |
|-------------|------------------------|-----------------------|---------------------|
| Method:     | 20190603-50_3000-pos.m | Acquisition Date:     | 6/5/2019 7:11:11 PM |
| File Name:  | D:\Data\IAC            | Operator:             | Shuyang Yang / XZ   |
| Source Type | ESI                    | Ion Polarity          | Positive            |
| Focus       | Active                 | Set Capillary         | 3500 V              |
| Scan Begin  | 50 m/z                 | Set End Plate Offset  | -500 V              |
| Scan End    | 3000 m/z               | Set Collision Cell RF | 600.0 Vpp           |
|             |                        | Set Nebulizer         | 0.3 Bar             |
|             |                        | Set Dry Heater        | 180 °C              |
|             |                        | Set Dry Gas           | 4.0 l/min           |
|             |                        | Set Divert Valve      | Source              |

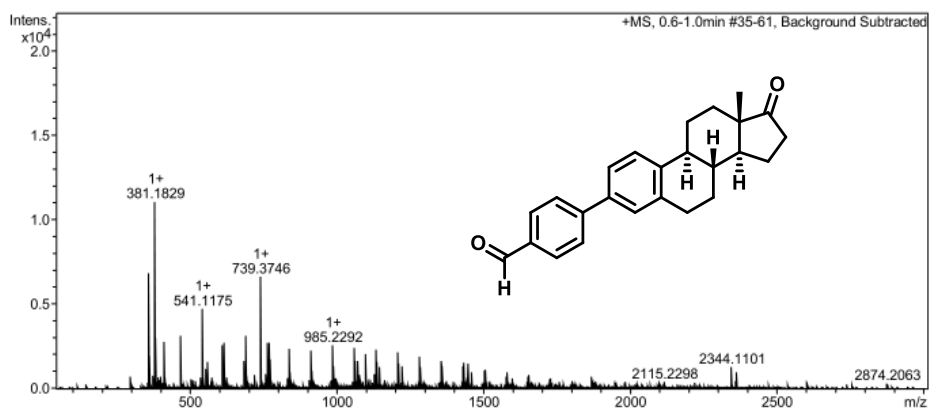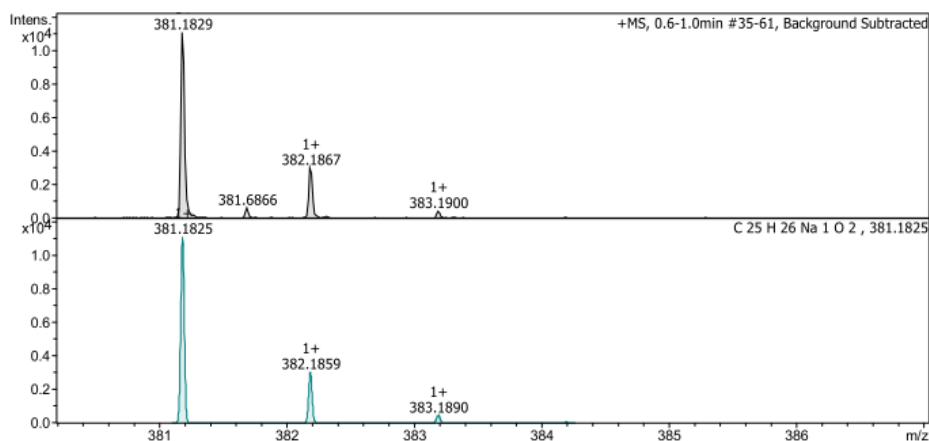



# RAJAVEL/ZHOU GUAN

## Evaluation Spectra / Validation Formula:

| Meas. m/z  | # | Ion Formula | Score  | m/z        | err [mDa] | err [ppm] | mSigma | rdb  | e <sup>-</sup> Conf | N-Rule | Adduct |
|------------|---|-------------|--------|------------|-----------|-----------|--------|------|---------------------|--------|--------|
| 381.182911 | 1 | C25H26NaO2  | 100.00 | 381.182501 | 0.4       | 1.1       | 2.9    | 12.5 | even                | ok     | M+Na   |

## Calibration Info:

Date: 6/13/2019 4:55:51 PM  
Polarity: Positive  
Calibration spectrum: +MS, 4.5-4.6min #270-276: Scan  
Reference mass list: ESI: Tuning Mix ES-TOF (ESI) (pos)  
Calibration mode: Enhanced Quadratic

| Reference m/z | Resulting m/z | Intensity | Error [ppm] |
|---------------|---------------|-----------|-------------|
| 118.0863      |               |           |             |
| 322.0481      | 322.0482      | 445       | 0.383       |
| 622.0290      | 622.0285      | 15330     | -0.770      |
| 922.0098      | 922.0092      | 37940     | -0.690      |
| 1221.9906     | 1221.9920     | 47690     | 1.084       |
| 1521.9715     | 1521.9724     | 51499     | 0.621       |
| 1821.9523     | 1821.9536     | 32714     | 0.693       |
| 2121.9332     | 2121.9321     | 40487     | -0.485      |
| 2421.9140     | 2421.9078     | 10648     | -2.545      |
| 2721.8948     | 2721.8995     | 2327      | 1.709       |

Standard deviation: 1.657

## Mass List:

| #  | m/z       | Res.  | S/N   | I %   | FWHM   |
|----|-----------|-------|-------|-------|--------|
| 1  | 360.3237  | 11786 | 571.8 | 61.7  | 0.0306 |
| 2  | 361.3255  | 12824 | 165.2 | 17.9  | 0.0282 |
| 3  | 381.1829  | 12468 | 824.0 | 100.0 | 0.0306 |
| 4  | 382.1867  | 12268 | 222.2 | 27.0  | 0.0312 |
| 5  | 413.2104  | 12922 | 185.2 | 25.2  | 0.0320 |
| 6  | 467.1020  | 13392 | 171.0 | 28.6  | 0.0349 |
| 7  | 541.1175  | 13628 | 193.0 | 42.7  | 0.0397 |
| 8  | 542.1204  | 12914 | 91.5  | 20.3  | 0.0420 |
| 9  | 543.1167  | 12866 | 76.6  | 17.1  | 0.0422 |
| 10 | 610.1839  | 14070 | 87.4  | 23.1  | 0.0434 |
| 11 | 615.1376  | 13106 | 91.7  | 24.5  | 0.0469 |
| 12 | 616.1379  | 13458 | 59.0  | 15.8  | 0.0458 |
| 13 | 689.1571  | 14666 | 88.9  | 28.4  | 0.0470 |
| 14 | 690.1574  | 12242 | 47.8  | 15.3  | 0.0564 |
| 15 | 739.3746  | 12494 | 169.2 | 59.8  | 0.0592 |
| 16 | 740.3770  | 13879 | 107.4 | 38.0  | 0.0533 |
| 17 | 763.1776  | 14197 | 66.6  | 24.6  | 0.0538 |
| 18 | 764.1739  | 14294 | 48.2  | 17.9  | 0.0535 |
| 19 | 771.4008  | 13928 | 66.2  | 24.9  | 0.0554 |
| 20 | 772.4009  | 19812 | 42.6  | 16.0  | 0.0390 |
| 21 | 837.1917  | 12991 | 51.8  | 21.6  | 0.0644 |
| 22 | 838.1954  | 13951 | 43.3  | 18.2  | 0.0601 |
| 23 | 911.2121  | 12958 | 43.9  | 20.5  | 0.0703 |
| 24 | 912.2121  | 11870 | 35.5  | 16.6  | 0.0769 |
| 25 | 913.2119  | 12115 | 34.6  | 16.2  | 0.0754 |
| 26 | 985.2292  | 14164 | 45.6  | 23.1  | 0.0696 |
| 27 | 986.2302  | 13596 | 39.5  | 20.1  | 0.0725 |
| 28 | 987.2276  | 13277 | 36.5  | 18.6  | 0.0744 |
| 29 | 1059.2463 | 13437 | 39.6  | 21.5  | 0.0788 |
| 30 | 1060.2493 | 13925 | 40.7  | 22.1  | 0.0761 |
| 31 | 1061.2439 | 13046 | 37.9  | 20.6  | 0.0813 |
| 32 | 1097.5659 | 12834 | 33.1  | 18.6  | 0.0855 |
| 33 | 1098.5662 | 15091 | 31.8  | 17.9  | 0.0728 |
| 34 | 1133.2681 | 13170 | 32.6  | 18.8  | 0.0861 |
| 35 | 1134.2663 | 12868 | 36.1  | 20.8  | 0.0881 |
| 36 | 1135.2648 | 13162 | 36.4  | 21.0  | 0.0863 |
| 37 | 1207.2844 | 13136 | 27.2  | 16.2  | 0.0919 |
| 38 | 1208.2866 | 13613 | 29.0  | 17.4  | 0.0888 |
| 39 | 1209.2808 | 13760 | 32.5  | 19.4  | 0.0879 |
| 40 | 1283.3059 | 14297 | 27.8  | 17.2  | 0.0898 |

| # | m/z      | Res.  | S/N | I %   | FWHM   |
|---|----------|-------|-----|-------|--------|
| 1 | 381.1825 | 12468 |     | 100.0 | 0.0306 |
| 2 | 382.1859 | 12501 |     | 27.3  | 0.0306 |
| 3 | 383.1890 | 12533 |     | 4.0   | 0.0306 |
| 4 | 384.1919 | 12566 |     | 0.4   | 0.0306 |



# Compound 33

RAJAVEL/ZHOU GUAN

|             |                                                   |                       |                     |
|-------------|---------------------------------------------------|-----------------------|---------------------|
| Method:     | 20190603-50_3000-pos.m                            | Acquisition Date:     | 6/5/2019 6:59:39 PM |
| File Name:  | D:\Data\IAC                                       | Operator:             | Shuyang Yang / XZ   |
| Source Type | TEST\YSY\20190605\ZHOU GUAN-2\28_P1-C-2_01_8996.d |                       |                     |
| Focus       | ES+                                               | Ion Polarity          | Positive            |
| Scan Begin  | 50 m/z                                            | Set Capillary         | 3500 V              |
| Scan End    | 3000 m/z                                          | Set End Plate Offset  | -500 V              |
|             |                                                   | Set Collision Cell RF | 600.0 Vpp           |
|             |                                                   | Set Nebulizer         | 0.3 Bar             |
|             |                                                   | Set Dry Heater        | 180 °C              |
|             |                                                   | Set Dry Gas           | 4.0 l/min           |
|             |                                                   | Set Divert Valve      | Source              |

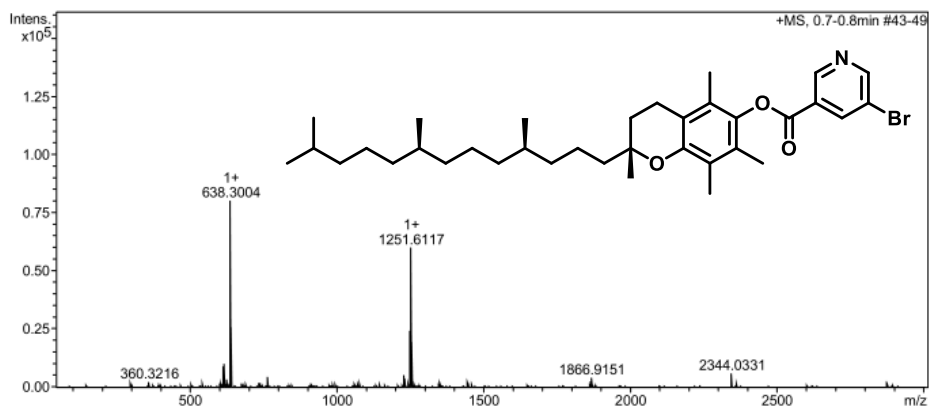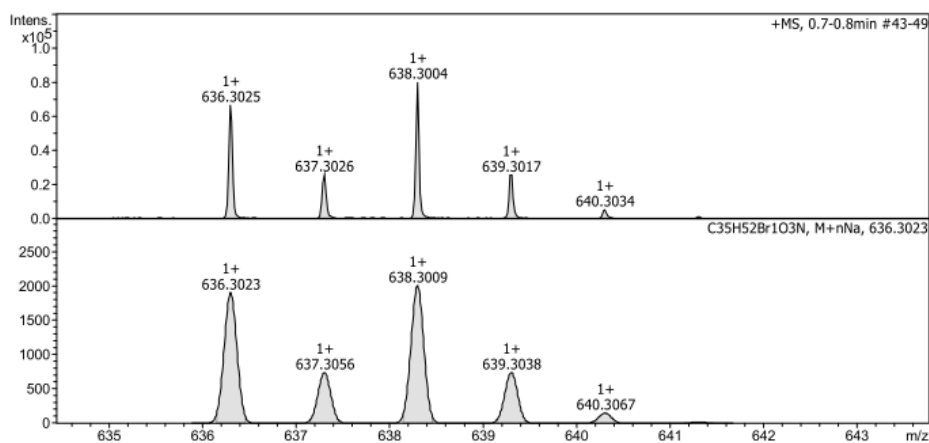



RAJAVEL/ZHOU GUAN

Evaluation Spectra / Validation Formula:

| Meas. m/z  | # | Ion Formula   | Score  | m/z        | err [mDa] | err [ppm] | mSigma | rdb | e <sup>-</sup> Conf | N-Rule | Adduct |
|------------|---|---------------|--------|------------|-----------|-----------|--------|-----|---------------------|--------|--------|
| 638.300395 | 1 | C35H54BrNNaO3 | 100.00 | 638.317927 | -17.5     | -27.5     | 410.5  | 8.5 | even                | ok     | M+Na   |

Calibration Info:

Date: 6/13/2019 4:35:02 PM  
Polarity: Positive  
Calibration spectrum: +MS, 4.6-4.7min #271-277: Scan  
Reference mass list: ESI: Tuning Mix ES-TOF (ESI) (pos)  
Calibration mode: Enhanced Quadratic

| Reference m/z | Resulting m/z | Intensity | Error [ppm] |
|---------------|---------------|-----------|-------------|
| 118.0863      |               |           |             |
| 322.0481      | 322.0482      | 420       | 0.318       |
| 622.0290      | 622.0286      | 19637     | -0.595      |
| 922.0098      | 922.0091      | 48307     | -0.723      |
| 1221.9906     | 1221.9918     | 61009     | 0.935       |
| 1521.9715     | 1521.9728     | 67855     | 0.871       |
| 1821.9523     | 1821.9525     | 42705     | 0.115       |
| 2121.9332     | 2121.9327     | 49312     | -0.192      |
| 2421.9140     | 2421.9087     | 12135     | -2.166      |
| 2721.8948     | 2721.8987     | 2778      | 1.436       |

Standard deviation: 1.416

Mass List:

| #  | m/z       | Res.  | S/N    | I %   | FWHM   |
|----|-----------|-------|--------|-------|--------|
| 1  | 360.3216  | 11808 | 171.5  | 3.0   | 0.0305 |
| 2  | 614.3190  | 11333 | 353.9  | 11.4  | 0.0542 |
| 3  | 615.3221  | 12537 | 148.6  | 4.8   | 0.0491 |
| 4  | 616.3166  | 13221 | 394.9  | 12.8  | 0.0466 |
| 5  | 617.3183  | 12587 | 154.4  | 5.0   | 0.0490 |
| 6  | 624.1103  | 12362 | 74.3   | 2.4   | 0.0505 |
| 7  | 626.1085  | 12372 | 129.2  | 4.2   | 0.0506 |
| 8  | 636.3025  | 15534 | 2490.7 | 83.2  | 0.0410 |
| 9  | 637.3026  | 13414 | 967.1  | 32.4  | 0.0475 |
| 10 | 638.3004  | 17175 | 2983.0 | 100.0 | 0.0372 |
| 11 | 639.3017  | 14171 | 956.5  | 32.1  | 0.0451 |
| 12 | 640.3034  | 12367 | 193.7  | 6.5   | 0.0518 |
| 13 | 734.2972  | 15159 | 68.1   | 2.6   | 0.0484 |
| 14 | 736.2958  | 12264 | 65.2   | 2.5   | 0.0600 |
| 15 | 763.2116  | 9569  | 121.6  | 4.9   | 0.0798 |
| 16 | 763.5763  | 13953 | 80.7   | 3.2   | 0.0547 |
| 17 | 1227.6274 | 11904 | 53.0   | 2.7   | 0.1031 |
| 18 | 1228.6302 | 13444 | 44.8   | 2.2   | 0.0914 |
| 19 | 1229.6286 | 13947 | 132.4  | 6.6   | 0.0882 |
| 20 | 1230.6262 | 13078 | 93.1   | 4.7   | 0.0941 |
| 21 | 1231.6235 | 12526 | 81.6   | 4.1   | 0.0983 |
| 22 | 1232.6256 | 10782 | 45.5   | 2.3   | 0.1143 |
| 23 | 1249.6124 | 14687 | 606.5  | 30.3  | 0.0851 |
| 24 | 1250.6143 | 14246 | 475.5  | 23.8  | 0.0878 |
| 25 | 1251.6117 | 18315 | 1497.3 | 74.8  | 0.0683 |
| 26 | 1252.6126 | 15451 | 940.8  | 47.0  | 0.0811 |
| 27 | 1253.6119 | 16150 | 962.2  | 48.1  | 0.0776 |
| 28 | 1254.6147 | 12977 | 490.8  | 24.5  | 0.0967 |
| 29 | 1255.6140 | 14697 | 221.2  | 11.0  | 0.0854 |
| 30 | 1256.6108 | 12572 | 65.7   | 3.3   | 0.1000 |
| 31 | 1349.6072 | 14211 | 43.0   | 2.1   | 0.0950 |
| 32 | 1445.5878 | 39574 | 41.9   | 2.0   | 0.0365 |
| 33 | 1446.0716 | 18254 | 55.8   | 2.6   | 0.0792 |
| 34 | 1864.9164 | 12954 | 85.5   | 3.0   | 0.1440 |
| 35 | 1865.9247 | 12851 | 92.5   | 3.2   | 0.1452 |
| 36 | 1866.9151 | 16516 | 145.9  | 5.1   | 0.1130 |
| 37 | 1867.9161 | 13680 | 129.9  | 4.5   | 0.1365 |
| 38 | 1868.9174 | 18026 | 94.9   | 3.3   | 0.1037 |
| 39 | 2344.0331 | 65247 | 319.0  | 7.4   | 0.0359 |
| 40 | 2344.6580 | 23355 | 162.0  | 3.7   | 0.1004 |

| # | m/z      | Res. | S/N | I %   | FWHM   |
|---|----------|------|-----|-------|--------|
| 1 | 636.3023 | 4126 |     | 95.0  | 0.1542 |
| 2 | 637.3056 | 4133 |     | 37.0  | 0.1542 |
| 3 | 638.3009 | 4139 |     | 100.0 | 0.1542 |
| 4 | 639.3038 | 4146 |     | 37.1  | 0.1542 |



RAJAVEL/ZHOU GUAN

---

| # | m/z      | Res. | S/N | I % | FWHM   |
|---|----------|------|-----|-----|--------|
| 5 | 640.3067 | 4152 |     | 7.4 | 0.1542 |
| 6 | 641.3098 | 4159 |     | 1.1 | 0.1542 |



# Compound 34

RAJAVEL/ZHOU GUAN

|             |                                                   |                       |                     |
|-------------|---------------------------------------------------|-----------------------|---------------------|
| Method:     | 20190603-50_3000-pos.m                            | Acquisition Date:     | 6/5/2019 7:05:25 PM |
| File Name:  | D:\Data\IAC                                       | Operator:             | Shuyang Yang / XZ   |
| Source Type | TEST\YSY\20190605\ZHOU GUAN-2\29_P1-C-3_01_8997.d |                       |                     |
| Focus       | ESI                                               | Ion Polarity          | Positive            |
| Scan Begin  | 50 m/z                                            | Set Nebulizer         | 0.3 Bar             |
| Scan End    | 3000 m/z                                          | Set Dry Heater        | 180 °C              |
|             |                                                   | Set End Plate Offset  | -500 V              |
|             |                                                   | Set Collision Cell RF | 600.0 Vpp           |
|             |                                                   | Set Dry Gas           | 4.0 l/min           |
|             |                                                   | Set Divert Valve      | Source              |

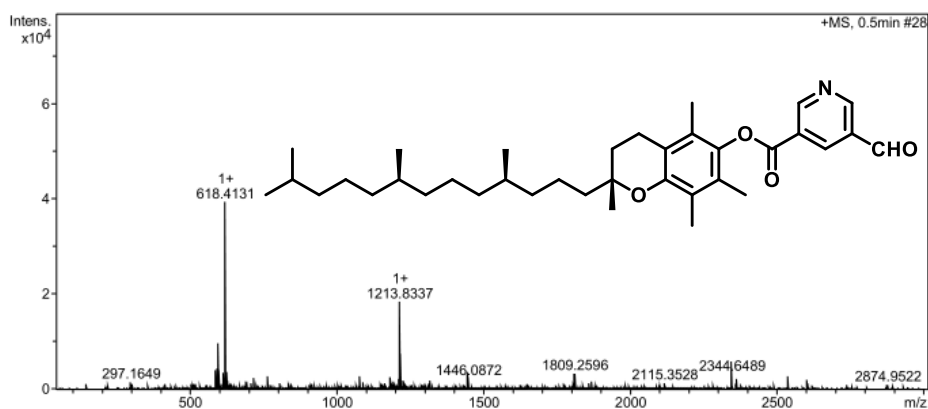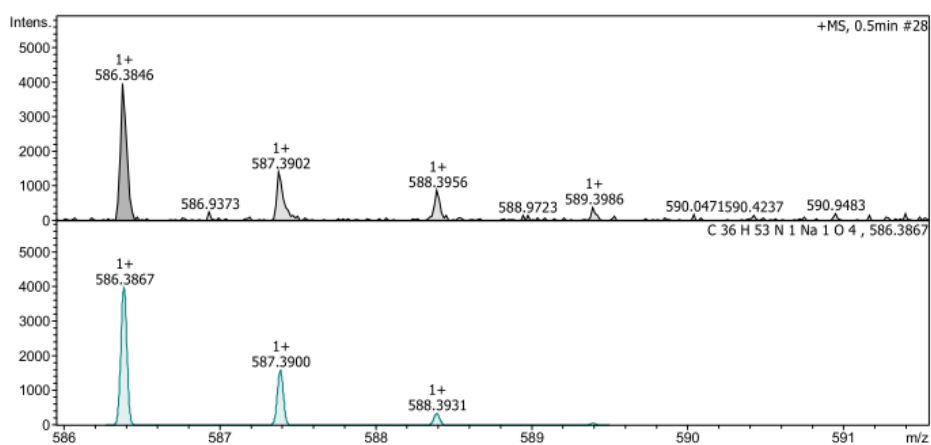



Evaluation Spectra / Validation Formula:

| Meas. m/z   | # | Ion Formula    | Score  | m/z         | err [mDa] | err [ppm] | mSigma | rdb  | e <sup>-</sup> Conf | N-Rule | Adduct |
|-------------|---|----------------|--------|-------------|-----------|-----------|--------|------|---------------------|--------|--------|
| 586.384628  | 1 | C36H53NNaO4    | 40.82  | 586.386680  | 2.1       | 3.5       | 83.2   | 10.5 | even                | ok     | M+Na   |
| 618.413137  | 1 | C38H53N5NaO    | 88.06  | 618.414232  | -1.1      | -1.8      | 31.7   | 14.5 | even                | ok     | M+Na   |
|             | 2 | C37H57NNaO5    | 100.00 | 618.412895  | -0.2      | -0.4      | 43.4   | 9.5  | even                | ok     | M+Na   |
| 1213.833697 | 1 | C74H114N2NaO10 | 14.41  | 1213.836569 | -2.9      | -2.4      | 49.4   | 18.5 | even                | ok     | 2M+Na  |
|             | 2 | C76H106N10NaO2 | 0.34   | 1213.839243 | 5.5       | 4.6       | 63.4   | 28.5 | even                | ok     | 2M+Na  |

Calibration Info:

Date: 6/13/2019 4:44:41 PM  
Polarity: Positive  
Calibration spectrum: +MS, 4.5-4.7min #270-277: Scan  
Reference mass list: ESI: Tuning Mix ES-TOF (ESI) (pos)  
Calibration mode: Enhanced Quadratic

| Reference m/z | Resulting m/z | Intensity | Error [ppm] |
|---------------|---------------|-----------|-------------|
| 118.0863      |               |           |             |
| 322.0481      | 322.0484      | 322       | 0.733       |
| 622.0290      | 622.0278      | 17115     | -1.809      |
| 922.0098      | 922.0095      | 44213     | -0.348      |
| 1221.9906     | 1221.9926     | 52267     | 1.626       |
| 1521.9715     | 1521.9730     | 56948     | 0.974       |
| 1821.9523     | 1821.9532     | 37080     | 0.478       |
| 2121.9332     | 2121.9326     | 41144     | -0.249      |
| 2421.9140     | 2421.9041     | 10167     | -4.072      |
| 2721.8948     | 2721.9021     | 2163      | 2.668       |

Standard deviation: 2.590

Mass List:

| #  | m/z       | Res.  | S/N   | I %   | FWHM   |
|----|-----------|-------|-------|-------|--------|
| 1  | 586.3846  | 13741 | 30.6  | 10.1  | 0.0427 |
| 2  | 592.4693  | 14208 | 34.6  | 11.4  | 0.0417 |
| 3  | 593.4755  | 17046 | 16.1  | 5.3   | 0.0348 |
| 4  | 596.4298  | 14210 | 75.2  | 24.8  | 0.0420 |
| 5  | 597.4340  | 12976 | 31.6  | 10.4  | 0.0460 |
| 6  | 614.4472  | 14862 | 26.8  | 8.9   | 0.0413 |
| 7  | 618.4131  | 14034 | 300.7 | 100.0 | 0.0441 |
| 8  | 619.4120  | 14836 | 150.0 | 49.9  | 0.0418 |
| 9  | 620.4190  | 12620 | 28.6  | 9.5   | 0.0492 |
| 10 | 626.3704  | 17147 | 28.8  | 9.6   | 0.0365 |
| 11 | 627.3846  | 17664 | 14.1  | 4.7   | 0.0355 |
| 12 | 693.1212  | 38041 | 13.0  | 4.3   | 0.0182 |
| 13 | 693.2452  | 39126 | 12.7  | 4.2   | 0.0177 |
| 14 | 716.4125  | 19190 | 18.2  | 6.0   | 0.0373 |
| 15 | 763.2607  | 16947 | 21.5  | 7.1   | 0.0450 |
| 16 | 763.5747  | 13716 | 15.3  | 5.0   | 0.0557 |
| 17 | 1077.8141 | 16764 | 18.7  | 6.4   | 0.0643 |
| 18 | 1089.0068 | 32881 | 11.9  | 4.0   | 0.0331 |
| 19 | 1181.8088 | 15296 | 19.5  | 6.7   | 0.0773 |
| 20 | 1182.8069 | 13947 | 18.3  | 6.3   | 0.0848 |
| 21 | 1191.8536 | 10887 | 13.1  | 4.5   | 0.1095 |
| 22 | 1209.8775 | 13003 | 16.9  | 5.8   | 0.0930 |
| 23 | 1210.8842 | 11559 | 13.3  | 4.6   | 0.1048 |
| 24 | 1213.8337 | 13355 | 136.5 | 46.8  | 0.0909 |
| 25 | 1214.8357 | 11416 | 98.7  | 33.9  | 0.1064 |
| 26 | 1215.8419 | 13897 | 56.1  | 19.3  | 0.0875 |
| 27 | 1216.8395 | 12541 | 19.2  | 6.6   | 0.0970 |
| 28 | 1225.5626 | 36057 | 13.2  | 4.5   | 0.0340 |
| 29 | 1317.4657 | 54430 | 14.6  | 4.9   | 0.0242 |
| 30 | 1445.5902 | 35393 | 13.2  | 4.4   | 0.0408 |
| 31 | 1446.0872 | 22925 | 17.2  | 5.8   | 0.0631 |
| 32 | 1809.2596 | 19111 | 27.0  | 8.6   | 0.0947 |
| 33 | 1810.2576 | 14322 | 25.8  | 8.3   | 0.1264 |
| 34 | 1811.2548 | 13887 | 18.5  | 5.9   | 0.1304 |
| 35 | 1868.3371 | 54911 | 12.9  | 4.1   | 0.0340 |
| 36 | 2344.0383 | 13469 | 24.0  | 7.0   | 0.1740 |
| 37 | 2344.6489 | 22572 | 28.2  | 8.2   | 0.1039 |
| 38 | 2360.9938 | 67131 | 20.3  | 5.8   | 0.0352 |
| 39 | 2536.5586 | 78881 | 26.7  | 7.2   | 0.0322 |
| 40 | 2602.4794 | 75234 | 19.4  | 5.1   | 0.0346 |



RAJAVEL/ZHOU GUAN

---

| # | m/z      | Res.  | S/N | I %   | FWHM   |
|---|----------|-------|-----|-------|--------|
| 1 | 586.3867 | 13741 |     | 100.0 | 0.0427 |
| 2 | 587.3900 | 13765 |     | 40.1  | 0.0427 |
| 3 | 588.3931 | 13788 |     | 8.6   | 0.0427 |
| 4 | 589.3961 | 13812 |     | 1.3   | 0.0427 |



# Compound 3b

## Acquisition Parameter

|             |                                           |                       |                      |
|-------------|-------------------------------------------|-----------------------|----------------------|
| Method:     | MS-MS.m                                   | Acquisition Date:     | 1/4/2019 12:01:28 PM |
| File Name:  | D:\Data\YSY\20190104\Z40_P1-B-3_01_8216.d | Operator:             | Shuyang Yang / XZ    |
| Source Type | ESI                                       | Ion Polarity          | Positive             |
| Focus       | Active                                    | Set Capillary         | 3500 V               |
| Scan Begin  | 50 m/z                                    | Set End Plate Offset  | -500 V               |
| Scan End    | 2800 m/z                                  | Set Collision Cell RF | 200.0 Vpp            |
|             |                                           | Set Nebulizer         | 0.8 Bar              |
|             |                                           | Set Dry Heater        | 200 °C               |
|             |                                           | Set Dry Gas           | 4.0 l/min            |
|             |                                           | Set Divert Valve      | Source               |

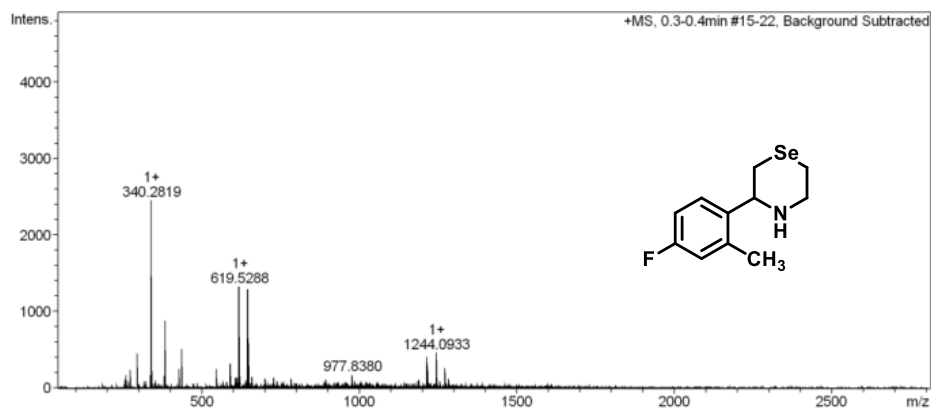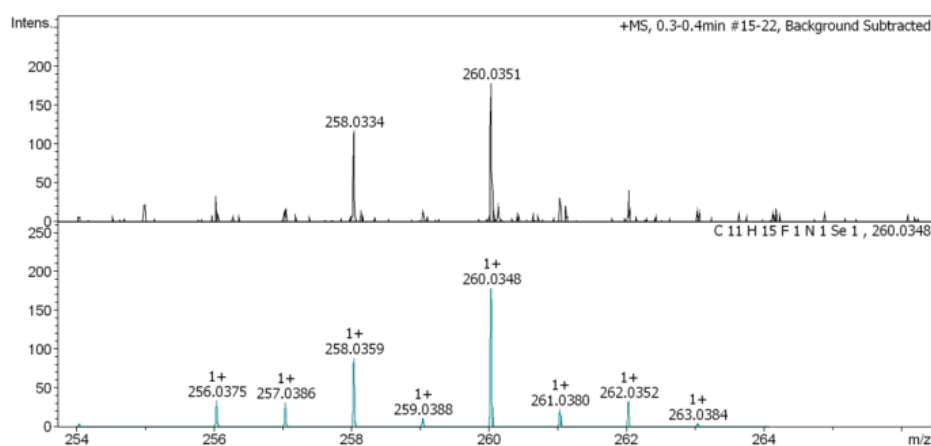



Evaluation Spectra / Validation Formula:

| Meas. m/z  | # | Ion Formula | m/z        | Adduct | err [mDa] | err [ppm] | mSigma | N-Rule | rdb | e <sup>-</sup> Conf | Score |
|------------|---|-------------|------------|--------|-----------|-----------|--------|--------|-----|---------------------|-------|
| 260.035065 | 1 | C11H15FNSe  | 260.034850 | M+H    | -0.2      | -0.8      | 631.5  | ok     | 4.5 | even                | -1.#J |

Calibration Info:

Date: 1/8/2019 5:00:28 PM  
Polarity: Positive  
Calibration spectrum: +MS, 0.2min #9: Scan  
Reference mass list: ESI: Tuning Mix ES-TOF\_140 (ESI) (pos)  
Calibration mode: Quadratic

| Reference m/z | Resulting m/z | Intensity | Error [ppm] |
|---------------|---------------|-----------|-------------|
| 118.0863      |               |           |             |
| 322.0481      |               |           |             |
| 622.0290      |               |           |             |
| 922.0098      | 922.0095      | 344       | -0.349      |
| 1221.9906     |               |           |             |
| 1521.9715     | 1521.9721     | 5692      | 0.412       |
| 1821.9523     |               |           |             |
| 2121.9332     | 2121.9328     | 1526      | -0.153      |
| 2421.9140     |               |           |             |
| 2721.8948     |               |           |             |
| 140.0682      | 140.0682      | 1274      | 0.131       |

Standard deviation: 0.625

Mass List:

| #  | m/z       | Res.  | S/N    | I %   | FWHM   |
|----|-----------|-------|--------|-------|--------|
| 1  | 258.0334  | 18136 | 81.4   | 4.8   | 0.0142 |
| 2  | 260.0351  | 12325 | 123.7  | 7.3   | 0.0211 |
| 3  | 274.2753  | 15590 | 160.1  | 9.8   | 0.0176 |
| 4  | 296.2561  | 11857 | 283.4  | 18.6  | 0.0250 |
| 5  | 297.2627  | 9356  | 68.7   | 4.5   | 0.0318 |
| 6  | 338.3403  | 9346  | 91.1   | 6.8   | 0.0362 |
| 7  | 340.2819  | 12405 | 1318.9 | 100.0 | 0.0274 |
| 8  | 341.2895  | 10524 | 234.3  | 17.9  | 0.0324 |
| 9  | 381.3015  | 13794 | 72.2   | 6.4   | 0.0276 |
| 10 | 384.3089  | 11661 | 401.0  | 36.4  | 0.0330 |
| 11 | 385.3128  | 11747 | 91.9   | 8.4   | 0.0328 |
| 12 | 428.3349  | 14286 | 100.0  | 10.3  | 0.0300 |
| 13 | 437.1958  | 14928 | 197.3  | 20.8  | 0.0293 |
| 14 | 548.4983  | 24704 | 76.9   | 10.4  | 0.0222 |
| 15 | 591.4954  | 13703 | 87.5   | 12.9  | 0.0432 |
| 16 | 592.4972  | 24360 | 41.9   | 6.2   | 0.0243 |
| 17 | 607.5679  | 19568 | 35.7   | 5.5   | 0.0310 |
| 18 | 614.5746  | 15044 | 36.8   | 5.8   | 0.0409 |
| 19 | 619.5288  | 11933 | 341.9  | 54.1  | 0.0519 |
| 20 | 620.5283  | 19705 | 182.3  | 28.9  | 0.0315 |
| 21 | 621.5313  | 13842 | 42.8   | 6.8   | 0.0449 |
| 22 | 647.5599  | 12080 | 312.8  | 53.0  | 0.0536 |
| 23 | 648.5608  | 13081 | 143.2  | 24.3  | 0.0496 |
| 24 | 649.5630  | 8721  | 28.0   | 4.8   | 0.0745 |
| 25 | 659.2859  | 14813 | 35.2   | 6.1   | 0.0445 |
| 26 | 701.5291  | 14707 | 28.3   | 5.4   | 0.0477 |
| 27 | 729.5630  | 14781 | 28.2   | 5.6   | 0.0494 |
| 28 | 783.5304  | 17838 | 25.0   | 5.4   | 0.0439 |
| 29 | 896.3296  | 14156 | 18.4   | 4.6   | 0.0633 |
| 30 | 976.5767  | 11577 | 23.1   | 6.4   | 0.0844 |
| 31 | 977.8380  | 18053 | 26.1   | 7.3   | 0.0542 |
| 32 | 1189.0416 | 13831 | 13.9   | 4.6   | 0.0860 |
| 33 | 1216.0575 | 15839 | 49.5   | 16.6  | 0.0768 |
| 34 | 1217.0690 | 15339 | 34.2   | 11.5  | 0.0793 |
| 35 | 1244.0933 | 13519 | 55.6   | 18.9  | 0.0920 |
| 36 | 1245.0938 | 12571 | 48.5   | 16.5  | 0.0990 |
| 37 | 1246.0939 | 12554 | 19.6   | 6.7   | 0.0993 |
| 38 | 1272.1202 | 15641 | 30.8   | 10.6  | 0.0813 |
| 39 | 1273.1271 | 12407 | 21.1   | 7.2   | 0.1026 |
| 40 | 1283.8572 | 28786 | 15.1   | 5.2   | 0.0446 |
| #  | m/z       | Res.  | S/N    | I %   | FWHM   |
| 1  | 254.0408  | 12041 |        | 1.8   | 0.0211 |
| 2  | 255.0441  | 12089 |        | 0.2   | 0.0211 |
| 3  | 256.0375  | 12136 |        | 18.8  | 0.0211 |
| 4  | 257.0386  | 12183 |        | 17.7  | 0.0211 |



---

| #  | m/z      | Res.  | S/N | I %   | FWHM   |
|----|----------|-------|-----|-------|--------|
| 5  | 258.0359 | 12231 |     | 49.8  | 0.0211 |
| 6  | 259.0388 | 12278 |     | 6.0   | 0.0211 |
| 7  | 260.0348 | 12325 |     | 100.0 | 0.0211 |
| 8  | 261.0380 | 12373 |     | 12.4  | 0.0211 |
| 9  | 262.0352 | 12420 |     | 18.2  | 0.0211 |
| 10 | 263.0384 | 12468 |     | 2.2   | 0.0211 |
| 11 | 264.0417 | 12515 |     | 0.1   | 0.0211 |



# Compound 3c

RAJAVEL/ZHOU GUAN

|             |                                         |                       |                      |
|-------------|-----------------------------------------|-----------------------|----------------------|
| Method:     | 20190614-50_3000-pos-ZHOUGUAN.m         | Acquisition Date:     | 6/14/2019 1:57:38 PM |
| File Name:  | D:\Data\IAC TEST\YSY\20190614\2-MAMUL.d | Operator:             | Shuyang Yang / XZ    |
| Source Type | ESI                                     | Ion Polarity          | Positive             |
| Focus       | Active                                  | Set Capillary         | 3000 V               |
| Scan Begin  | 50 m/z                                  | Set End Plate Offset  | -500 V               |
| Scan End    | 3000 m/z                                | Set Collision Cell RF | 500.0 Vpp            |
|             |                                         | Set Nebulizer         | 0.2 Bar              |
|             |                                         | Set Dry Heater        | 170 °C               |
|             |                                         | Set Dry Gas           | 3.0 l/min            |
|             |                                         | Set Divert Valve      | Source               |

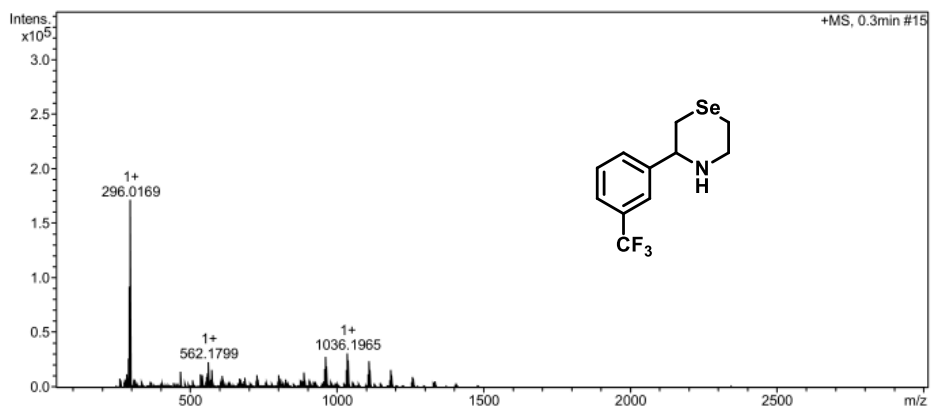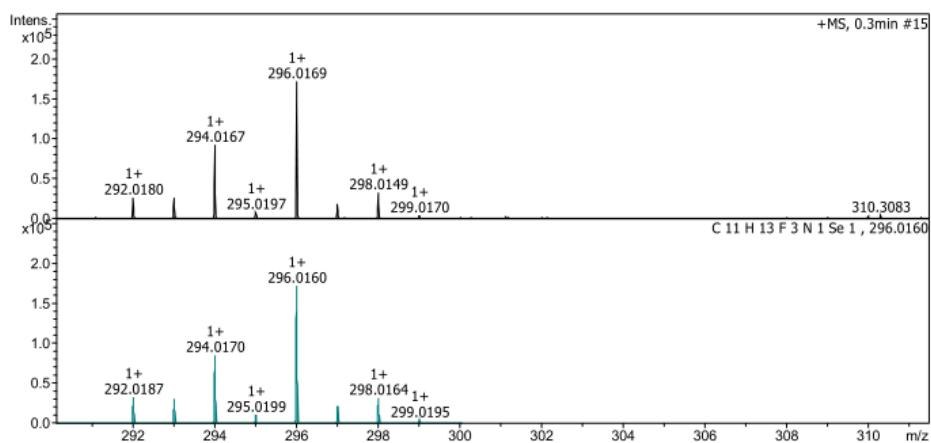



Evaluation Spectra / Validation Formula:

| Meas. m/z  | # | Ion Formula | Score  | m/z        | err [mDa] | err [ppm] | mSigma | rdb | e <sup>-</sup> Conf | N-Rule | Adduct |
|------------|---|-------------|--------|------------|-----------|-----------|--------|-----|---------------------|--------|--------|
| 296.016940 | 1 | C11H13F3NSe | 100.00 | 296.016006 | 0.9       | 3.2       | 20.1   | 4.5 | even                | ok     | M+H    |

Calibration Info:

Date: 6/14/2019 2:30:42 PM  
Polarity: Positive  
Calibration spectrum: +MS, 4.5-4.7min #270-279: Scan  
Reference mass list: ESI: Tuning Mix ES-TOF (ESI) (pos)  
Calibration mode: Enhanced Quadratic

| Reference m/z | Resulting m/z | Intensity | Error [ppm] |
|---------------|---------------|-----------|-------------|
| 118.0863      |               |           |             |
| 322.0481      |               |           |             |
| 622.0290      | 622.0289      | 15971     | -0.087      |
| 922.0098      | 922.0102      | 40359     | 0.406       |
| 1221.9906     | 1221.9898     | 49790     | -0.693      |
| 1521.9715     | 1521.9724     | 55249     | 0.596       |
| 1821.9523     | 1821.9516     | 38469     | -0.399      |
| 2121.9332     | 2121.9337     | 40176     | 0.272       |
| 2421.9140     | 2421.9138     | 9105      | -0.095      |
| 2721.8948     |               |           |             |

Standard deviation: 0.673

Mass List:

| #  | m/z       | Res.  | S/N   | I %   | FWHM   |
|----|-----------|-------|-------|-------|--------|
| 1  | 284.2941  | 11726 | 53.3  | 7.0   | 0.0242 |
| 2  | 292.0180  | 11747 | 118.0 | 15.5  | 0.0249 |
| 3  | 293.0187  | 11571 | 117.7 | 15.4  | 0.0253 |
| 4  | 294.0167  | 15764 | 410.9 | 53.8  | 0.0187 |
| 5  | 296.0169  | 13272 | 763.7 | 100.0 | 0.0223 |
| 6  | 297.0188  | 13669 | 84.5  | 11.1  | 0.0217 |
| 7  | 298.0149  | 13343 | 145.4 | 19.0  | 0.0223 |
| 8  | 467.1026  | 13375 | 64.2  | 8.7   | 0.0349 |
| 9  | 536.1658  | 14677 | 52.2  | 7.3   | 0.0365 |
| 10 | 541.1186  | 12961 | 47.2  | 6.6   | 0.0417 |
| 11 | 557.0962  | 12896 | 40.7  | 5.7   | 0.0432 |
| 12 | 560.1792  | 12697 | 53.9  | 7.6   | 0.0441 |
| 13 | 562.1799  | 11738 | 96.2  | 13.6  | 0.0479 |
| 14 | 574.1655  | 13869 | 67.0  | 9.5   | 0.0414 |
| 15 | 610.1847  | 13934 | 41.6  | 6.0   | 0.0438 |
| 16 | 730.1636  | 12262 | 42.6  | 6.4   | 0.0595 |
| 17 | 804.1831  | 11756 | 43.8  | 6.6   | 0.0684 |
| 18 | 888.1600  | 17634 | 55.1  | 8.1   | 0.0504 |
| 19 | 958.4553  | 13210 | 39.8  | 5.7   | 0.0726 |
| 20 | 960.1807  | 15872 | 68.4  | 9.8   | 0.0605 |
| 21 | 961.1811  | 12864 | 43.7  | 6.3   | 0.0747 |
| 22 | 962.1814  | 14639 | 113.0 | 16.2  | 0.0657 |
| 23 | 963.1835  | 13707 | 75.1  | 10.7  | 0.0703 |
| 24 | 964.1808  | 13581 | 77.9  | 11.1  | 0.0710 |
| 25 | 965.1805  | 13192 | 46.4  | 6.6   | 0.0732 |
| 26 | 1034.1985 | 14725 | 66.9  | 9.2   | 0.0702 |
| 27 | 1035.1965 | 14407 | 59.1  | 8.1   | 0.0719 |
| 28 | 1036.1965 | 16039 | 132.8 | 18.3  | 0.0646 |
| 29 | 1037.1977 | 14725 | 96.3  | 13.2  | 0.0704 |
| 30 | 1038.1918 | 16258 | 104.3 | 14.3  | 0.0639 |
| 31 | 1039.1960 | 14649 | 51.4  | 7.1   | 0.0709 |
| 32 | 1108.2116 | 14042 | 55.1  | 7.3   | 0.0789 |
| 33 | 1110.2142 | 16965 | 107.1 | 14.1  | 0.0654 |
| 34 | 1111.2114 | 13747 | 78.6  | 10.3  | 0.0808 |
| 35 | 1112.2139 | 14187 | 72.3  | 9.5   | 0.0784 |
| 36 | 1113.2098 | 16380 | 55.8  | 7.3   | 0.0680 |
| 37 | 1184.2301 | 16426 | 74.4  | 9.4   | 0.0721 |
| 38 | 1185.2292 | 12710 | 50.4  | 6.4   | 0.0933 |
| 39 | 1186.2301 | 14307 | 51.0  | 6.4   | 0.0829 |
| 40 | 1259.2504 | 14575 | 45.7  | 5.5   | 0.0864 |
| #  | m/z       | Res.  | S/N   | I %   | FWHM   |
| 1  | 290.0219  | 13003 |       | 1.8   | 0.0223 |
| 2  | 291.0253  | 13048 |       | 0.2   | 0.0223 |
| 3  | 292.0187  | 13093 |       | 18.8  | 0.0223 |
| 4  | 293.0197  | 13137 |       | 17.7  | 0.0223 |



RAJAVEL/ZHOU GUAN

---

| #  | m/z      | Res.  | S/N | I %   | FWHM   |
|----|----------|-------|-----|-------|--------|
| 5  | 294.0170 | 13182 |     | 49.8  | 0.0223 |
| 6  | 295.0199 | 13227 |     | 6.0   | 0.0223 |
| 7  | 296.0160 | 13272 |     | 100.0 | 0.0223 |
| 8  | 297.0192 | 13317 |     | 12.4  | 0.0223 |
| 9  | 298.0164 | 13361 |     | 18.2  | 0.0223 |
| 10 | 299.0195 | 13406 |     | 2.2   | 0.0223 |
| 11 | 300.0229 | 13451 |     | 0.1   | 0.0223 |



## Compound 3d

### Acquisition Parameter

|             |                                           |                       |                      |
|-------------|-------------------------------------------|-----------------------|----------------------|
| Method:     | MS-MS.m                                   | Acquisition Date:     | 1/4/2019 12:07:19 PM |
| File Name:  | D:\Data\YSY\20190104\Z41_P1-B-4_01_8217.d | Operator:             | Shuyang Yang / XZ    |
| Source Type | ESI                                       | Ion Polarity          | Positive             |
| Focus       | Active                                    | Set Capillary         | 3500 V               |
| Scan Begin  | 50 m/z                                    | Set End Plate Offset  | -500 V               |
| Scan End    | 2800 m/z                                  | Set Collision Cell RF | 200.0 Vpp            |
|             |                                           | Set Nebulizer         | 0.8 Bar              |
|             |                                           | Set Dry Heater        | 200 °C               |
|             |                                           | Set Dry Gas           | 4.0 l/min            |
|             |                                           | Set Divert Valve      | Source               |

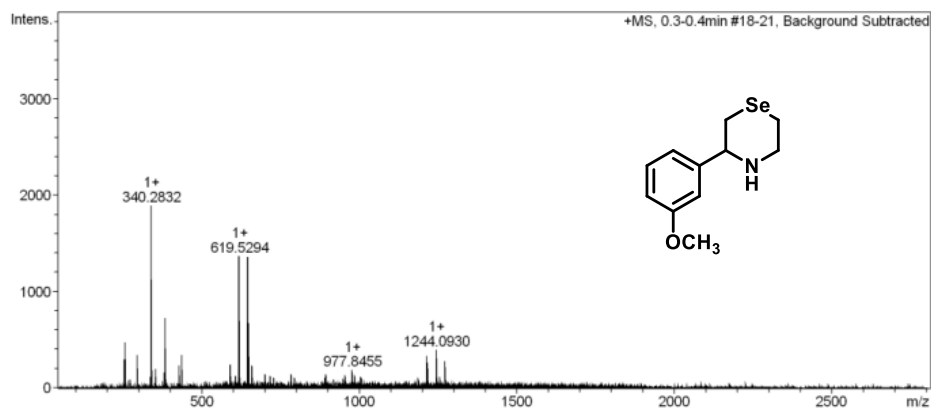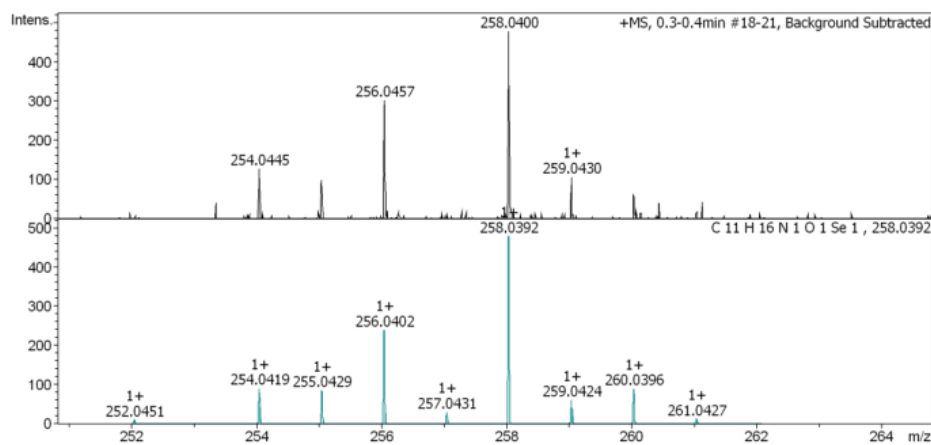



Evaluation Spectra / Validation Formula:

| Meas. m/z  | # | Ion Formula | m/z        | Adduct | err [mDa] | err [ppm] | mSigma | N-Rule | rdb | e <sup>-</sup> Conf | Score  |
|------------|---|-------------|------------|--------|-----------|-----------|--------|--------|-----|---------------------|--------|
| 258.040030 | 1 | C11H16NOSe  | 258.039192 | M+H    | -0.8      | -3.2      | 330.0  | ok     | 4.5 | even                | 100.00 |

Calibration Info:

Date: 1/8/2019 5:14:19 PM  
Polarity: Positive  
Calibration spectrum: +MS, 0.2min #10: Scan  
Reference mass list: ESI: Tuning Mix ES-TOF\_140 (ESI) (pos)  
Calibration mode: Quadratic

| Reference m/z | Resulting m/z | Intensity | Error [ppm] |
|---------------|---------------|-----------|-------------|
| 118.0863      |               |           |             |
| 322.0481      |               |           |             |
| 622.0290      |               |           |             |
| 922.0098      | 922.0091      | 771       | -0.723      |
| 1221.9906     |               |           |             |
| 1521.9715     | 1521.9728     | 8464      | 0.855       |
| 1821.9523     |               |           |             |
| 2121.9332     | 2121.9325     | 1996      | -0.317      |
| 2421.9140     |               |           |             |
| 2721.8948     |               |           |             |
| 140.0682      | 140.0682      | 1864      | 0.271       |

Standard deviation: 1.297

Mass List:

| #  | m/z       | Res.  | S/N    | I %   | FWHM   |
|----|-----------|-------|--------|-------|--------|
| 1  | 254.0445  | 11261 | 1146.1 | 6.7   | 0.0226 |
| 2  | 256.0457  | 17168 | 2701.4 | 15.9  | 0.0149 |
| 3  | 258.0400  | 13255 | 4236.7 | 25.3  | 0.0195 |
| 4  | 296.2571  | 11289 | 2652.1 | 18.4  | 0.0262 |
| 5  | 338.3448  | 12437 | 627.5  | 6.3   | 0.0272 |
| 6  | 340.2832  | 11933 | 9830.0 | 100.0 | 0.0285 |
| 7  | 341.2876  | 8684  | 1775.8 | 18.2  | 0.0393 |
| 8  | 353.2650  | 13417 | 892.0  | 10.4  | 0.0263 |
| 9  | 381.3041  | 16779 | 573.3  | 8.8   | 0.0227 |
| 10 | 384.3094  | 10486 | 2455.7 | 38.7  | 0.0367 |
| 11 | 385.3103  | 19650 | 782.1  | 12.4  | 0.0196 |
| 12 | 428.3385  | 16047 | 575.1  | 12.7  | 0.0267 |
| 13 | 437.2016  | 10927 | 769.7  | 18.3  | 0.0400 |
| 14 | 591.5017  | 12706 | 195.8  | 12.9  | 0.0466 |
| 15 | 607.5672  | 19437 | 90.4   | 6.6   | 0.0313 |
| 16 | 619.5294  | 13138 | 909.7  | 72.3  | 0.0472 |
| 17 | 620.5324  | 13658 | 387.7  | 31.0  | 0.0454 |
| 18 | 621.5399  | 10527 | 74.0   | 6.0   | 0.0590 |
| 19 | 647.5610  | 12720 | 755.6  | 72.1  | 0.0509 |
| 20 | 648.5664  | 16561 | 375.0  | 36.0  | 0.0392 |
| 21 | 649.5660  | 24704 | 83.5   | 8.0   | 0.0263 |
| 22 | 659.2995  | 21270 | 120.2  | 12.3  | 0.0310 |
| 23 | 701.5322  | 21454 | 60.0   | 7.8   | 0.0327 |
| 24 | 718.6297  | 27232 | 46.8   | 6.5   | 0.0264 |
| 25 | 729.5669  | 19078 | 41.4   | 6.0   | 0.0382 |
| 26 | 783.5410  | 25904 | 43.6   | 7.8   | 0.0302 |
| 27 | 894.3324  | 17221 | 30.8   | 7.8   | 0.0519 |
| 28 | 956.8612  | 10567 | 24.4   | 7.2   | 0.0906 |
| 29 | 977.8455  | 10464 | 32.0   | 10.0  | 0.0934 |
| 30 | 978.8402  | 16557 | 26.5   | 8.3   | 0.0591 |
| 31 | 985.9018  | 23646 | 22.7   | 7.2   | 0.0417 |
| 32 | 1005.8670 | 16259 | 19.3   | 6.4   | 0.0619 |
| 33 | 1216.0602 | 15870 | 40.6   | 17.9  | 0.0766 |
| 34 | 1217.0628 | 14520 | 31.4   | 13.9  | 0.0838 |
| 35 | 1244.0930 | 11037 | 46.6   | 21.1  | 0.1127 |
| 36 | 1245.0950 | 13934 | 43.8   | 19.9  | 0.0894 |
| 37 | 1246.1001 | 11066 | 15.9   | 7.2   | 0.1126 |
| 38 | 1255.8276 | 27665 | 13.7   | 6.3   | 0.0454 |
| 39 | 1272.1279 | 10968 | 22.3   | 10.3  | 0.1160 |
| 40 | 1273.1241 | 24623 | 31.6   | 14.6  | 0.0517 |
|    |           |       |        |       |        |
| #  | m/z       | Res.  | S/N    | I %   | FWHM   |
| 1  | 252.0451  | 12947 |        | 1.8   | 0.0195 |
| 2  | 253.0485  | 12998 |        | 0.2   | 0.0195 |
| 3  | 254.0419  | 13049 |        | 18.8  | 0.0195 |
| 4  | 255.0429  | 13101 |        | 17.7  | 0.0195 |



---

| #  | m/z      | Res.  | S/N | I %   | FWHM   |
|----|----------|-------|-----|-------|--------|
| 5  | 256.0402 | 13152 |     | 49.8  | 0.0195 |
| 6  | 257.0431 | 13203 |     | 6.1   | 0.0195 |
| 7  | 258.0392 | 13255 |     | 100.0 | 0.0195 |
| 8  | 259.0424 | 13306 |     | 12.4  | 0.0195 |
| 9  | 260.0396 | 13357 |     | 18.4  | 0.0195 |
| 10 | 261.0427 | 13409 |     | 2.2   | 0.0195 |
| 11 | 262.0460 | 13460 |     | 0.2   | 0.0195 |



# Compound 3e

RAJAVEL/ZHOU GUAN

|             |                                                   |                       |                       |
|-------------|---------------------------------------------------|-----------------------|-----------------------|
| Method:     | 20190603-50_3000-pos.m                            | Acquisition Date:     | 6/14/2019 10:49:23 AM |
| File Name:  | D:\Data\IAC TEST\YSY\20190613\10_P1-A-5_01_9053.d | Operator:             | Shuyang Yang / XZ     |
| Source Type | ESI                                               | Ion Polarity          | Positive              |
| Focus       | Active                                            | Set Capillary         | 3500 V                |
| Scan Begin  | 50 m/z                                            | Set End Plate Offset  | -500 V                |
| Scan End    | 3000 m/z                                          | Set Collision Cell RF | 600.0 Vpp             |
|             |                                                   | Set Nebulizer         | 0.3 Bar               |
|             |                                                   | Set Dry Heater        | 180 °C                |
|             |                                                   | Set Dry Gas           | 4.0 l/min             |
|             |                                                   | Set Divert Valve      | Source                |

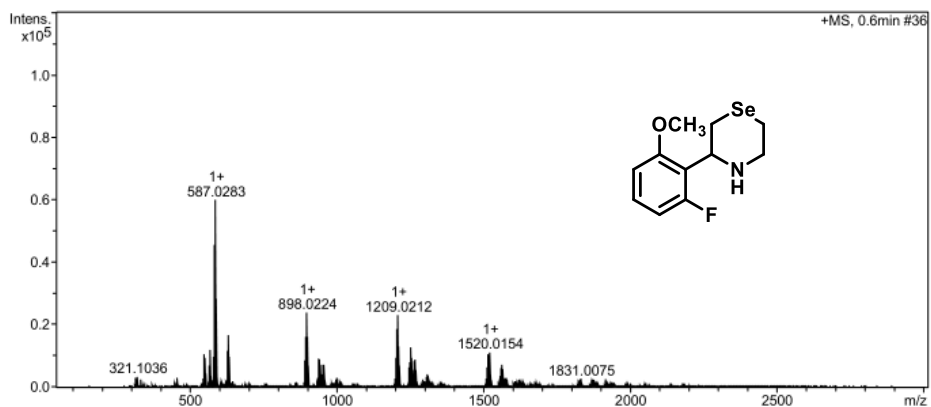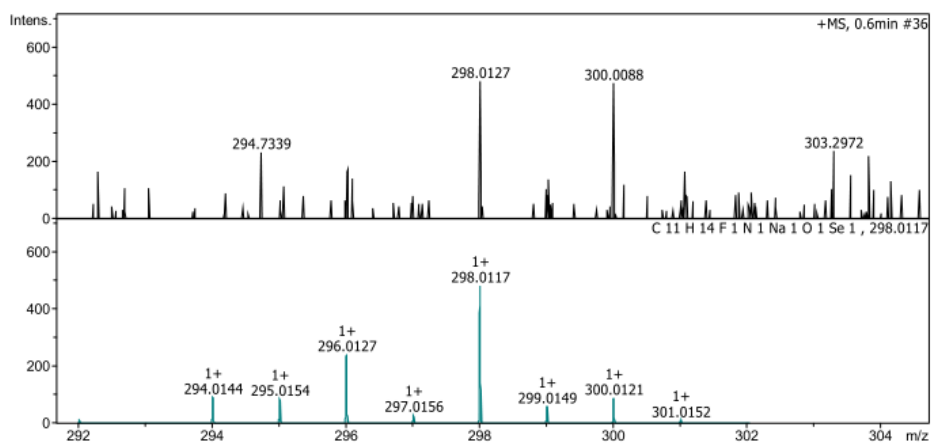



## Evaluation Spectra / Validation Formula:

| Meas. m/z  | # | Ion Formula   | Score  | m/z        | err [mDa] | err [ppm] | mSigma | rdb | e <sup>-</sup> Conf | N-Rule | Adduct |
|------------|---|---------------|--------|------------|-----------|-----------|--------|-----|---------------------|--------|--------|
| 298.012695 | 1 | C11H14FNNaOSe | 100.00 | 298.011715 | -1.0      | -3.3      | 453.5  | 4.5 | even                | ok     | M+Na   |

## Calibration Info:

Date: 6/14/2019 11:44:15 AM  
Polarity: Positive  
Calibration spectrum: +MS, 4.5-4.6min #270-273: Scan  
Reference mass list: ESI: Tuning Mix ES-TOF (ESI) (pos)  
Calibration mode: Enhanced Quadratic

| Reference m/z | Resulting m/z | Intensity | Error [ppm] |
|---------------|---------------|-----------|-------------|
| 118.0863      |               |           |             |
| 322.0481      | 322.0484      | 484       | 0.883       |
| 622.0290      | 622.0274      | 12762     | -2.526      |
| 922.0098      | 922.0104      | 31252     | 0.694       |
| 1221.9906     | 1221.9918     | 45846     | 0.991       |
| 1521.9715     | 1521.9739     | 42324     | 1.606       |
| 1821.9523     | 1821.9522     | 33985     | -0.040      |
| 2121.9332     | 2121.9313     | 39177     | -0.891      |
| 2421.9140     | 2421.9067     | 9863      | -3.026      |
| 2721.8948     | 2721.9011     | 2545      | 2.308       |

Standard deviation: 2.374

## Mass List:

| #  | m/z       | Res.  | S/N   | I %   | FWHM   |
|----|-----------|-------|-------|-------|--------|
| 1  | 549.0479  | 13243 | 56.5  | 17.8  | 0.0415 |
| 2  | 551.0506  | 12206 | 49.9  | 15.7  | 0.0451 |
| 3  | 569.2979  | 13451 | 63.4  | 20.0  | 0.0423 |
| 4  | 581.0300  | 13233 | 51.1  | 16.1  | 0.0439 |
| 5  | 582.0316  | 15554 | 46.3  | 14.6  | 0.0374 |
| 6  | 583.0287  | 14073 | 134.0 | 42.4  | 0.0414 |
| 7  | 584.0296  | 13533 | 95.0  | 30.1  | 0.0432 |
| 8  | 585.0286  | 14488 | 240.5 | 76.0  | 0.0404 |
| 9  | 586.0282  | 13511 | 85.2  | 27.0  | 0.0434 |
| 10 | 587.0283  | 16418 | 316.1 | 100.0 | 0.0358 |
| 11 | 588.0291  | 13597 | 76.1  | 24.1  | 0.0432 |
| 12 | 589.0270  | 14860 | 149.9 | 47.4  | 0.0396 |
| 13 | 628.9757  | 13222 | 61.7  | 19.5  | 0.0476 |
| 14 | 630.9749  | 14223 | 88.8  | 28.1  | 0.0444 |
| 15 | 632.9738  | 15153 | 52.2  | 16.5  | 0.0418 |
| 16 | 893.0278  | 16240 | 47.5  | 14.9  | 0.0550 |
| 17 | 894.0288  | 14268 | 86.2  | 27.1  | 0.0627 |
| 18 | 895.0294  | 12640 | 60.0  | 18.9  | 0.0708 |
| 19 | 896.0270  | 13852 | 117.0 | 36.8  | 0.0647 |
| 20 | 897.0256  | 14445 | 63.0  | 19.8  | 0.0621 |
| 21 | 898.0224  | 15346 | 127.0 | 39.9  | 0.0585 |
| 22 | 900.0222  | 15586 | 85.4  | 26.9  | 0.0577 |
| 23 | 939.9740  | 14126 | 48.2  | 15.3  | 0.0665 |
| 24 | 941.9739  | 12366 | 47.7  | 15.1  | 0.0762 |
| 25 | 1203.0262 | 12964 | 48.6  | 15.9  | 0.0928 |
| 26 | 1204.0270 | 15450 | 59.6  | 19.5  | 0.0779 |
| 27 | 1205.0251 | 15567 | 95.4  | 31.2  | 0.0774 |
| 28 | 1206.0246 | 16904 | 81.8  | 26.8  | 0.0713 |
| 29 | 1207.0239 | 14846 | 104.8 | 34.3  | 0.0813 |
| 30 | 1208.0242 | 14861 | 72.3  | 23.7  | 0.0813 |
| 31 | 1209.0212 | 16607 | 117.6 | 38.5  | 0.0728 |
| 32 | 1210.0213 | 16648 | 65.5  | 21.5  | 0.0727 |
| 33 | 1211.0191 | 13840 | 66.0  | 21.6  | 0.0875 |
| 34 | 1250.9751 | 16133 | 64.5  | 21.5  | 0.0775 |
| 35 | 1252.9695 | 16469 | 58.4  | 19.4  | 0.0761 |
| 36 | 1254.9714 | 15610 | 48.1  | 16.0  | 0.0804 |
| 37 | 1266.9767 | 15565 | 44.6  | 14.9  | 0.0814 |
| 38 | 1516.0223 | 16225 | 55.1  | 17.7  | 0.0934 |
| 39 | 1518.0231 | 14553 | 53.3  | 17.1  | 0.1043 |
| 40 | 1520.0154 | 16617 | 58.3  | 18.7  | 0.0915 |
| #  | m/z       | Res.  | S/N   | I %   | FWHM   |
| 1  | 292.0176  | 20918 |       | 1.8   | 0.0140 |
| 2  | 293.0210  | 20990 |       | 0.2   | 0.0140 |
| 3  | 294.0144  | 21061 |       | 18.8  | 0.0140 |
| 4  | 295.0154  | 21133 |       | 17.6  | 0.0140 |



RAJAVEL/ZHOU GUAN

---

| #  | m/z      | Res.  | S/N | I %   | FWHM   |
|----|----------|-------|-----|-------|--------|
| 5  | 296.0127 | 21204 |     | 49.8  | 0.0140 |
| 6  | 297.0156 | 21276 |     | 6.1   | 0.0140 |
| 7  | 298.0117 | 21347 |     | 100.0 | 0.0140 |
| 8  | 299.0149 | 21419 |     | 12.4  | 0.0140 |
| 9  | 300.0121 | 21491 |     | 18.4  | 0.0140 |
| 10 | 301.0152 | 21562 |     | 2.2   | 0.0140 |
| 11 | 302.0186 | 21634 |     | 0.2   | 0.0140 |



### Compound 3f

### Acquisition Parameter

|             |                                           |                       |           |
|-------------|-------------------------------------------|-----------------------|-----------|
| Method:     | MS-MS.m                                   |                       |           |
| File Name:  | D:\Data\YSY\20190104\Z44_P1-B-7_01_8220.d |                       |           |
| Source Type | ESI                                       | Ion Polarity          | Positive  |
| Focus       | Active                                    | Set Capillary         | 3500 V    |
| Scan Begin  | 50 m/z                                    | Set End Plate Offset  | -500 V    |
| Scan End    | 2800 m/z                                  | Set Collision Cell RF | 200.0 Vpp |

Acquisition Date: 1/4/2019 12:24:59 PM  
Operator: Shuyang Yang / XZ

|                  |           |
|------------------|-----------|
| Set Nebulizer    | 0.8 Bar   |
| Set Dry Heater   | 200 °C    |
| Set Dry Gas      | 4.0 l/min |
| Set Divert Valve | Source    |

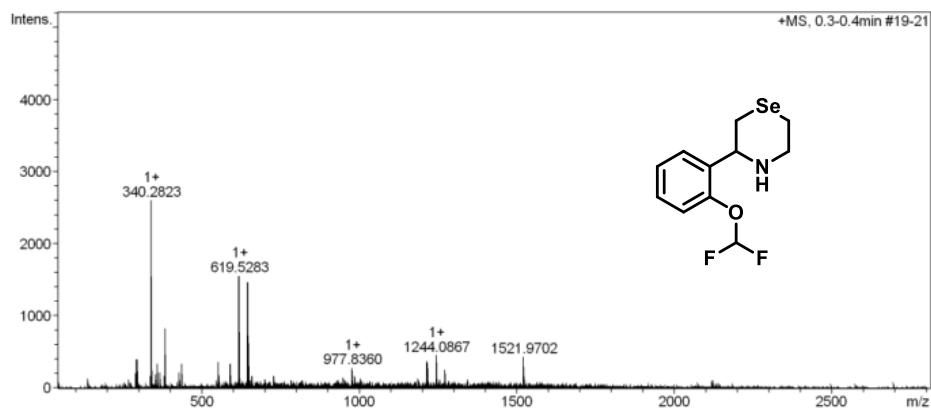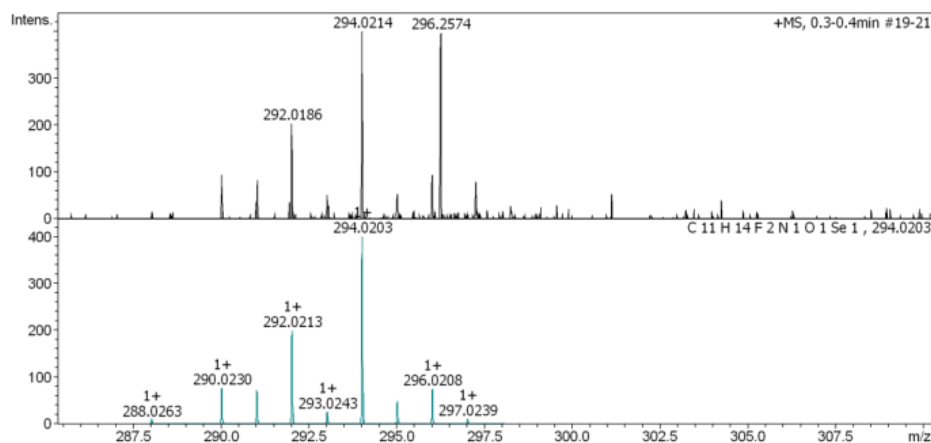



Evaluation Spectra / Validation Formula:

| Meas. m/z  | # | Ion Formula  | m/z        | Adduct | err [mDa] | err [ppm] | mSigma | N-Rule | rdb | e <sup>-</sup> Conf | Score |
|------------|---|--------------|------------|--------|-----------|-----------|--------|--------|-----|---------------------|-------|
| 294.021367 | 1 | C11H14F2NOSe | 294.020349 | M+H    | -1.0      | -3.5      | 471.2  | ok     | 4.5 | even                | -1.#J |

Calibration Info:

Date: 1/8/2019 5:20:58 PM  
Polarity: Positive  
Calibration spectrum: +MS, 0.2min #10: Scan  
Reference mass list: ESI: Tuning Mix ES-TOF\_140 (ESI) (pos)  
Calibration mode: Quadratic

| Reference m/z             | Resulting m/z | Intensity | Error [ppm] |
|---------------------------|---------------|-----------|-------------|
| 118.0863                  |               |           |             |
| 322.0481                  |               |           |             |
| 622.0290                  |               |           |             |
| 922.0098                  | 922.0098      | 584       | 0.007       |
| 1221.9906                 |               |           |             |
| 1521.9715                 | 1521.9715     | 8472      | -0.009      |
| 1821.9523                 |               |           |             |
| 2121.9332                 | 2121.9332     | 1873      | 0.003       |
| 2421.9140                 |               |           |             |
| 2721.8948                 |               |           |             |
| 140.0682                  | 140.0682      | 1757      | -0.003      |
| Standard deviation: 0.013 |               |           |             |

Mass List:

| #  | m/z       | Res.  | S/N    | I %   | FWHM   |
|----|-----------|-------|--------|-------|--------|
| 1  | 140.0664  | 9107  | 476.8  | 5.0   | 0.0154 |
| 2  | 292.0186  | 10886 | 325.7  | 7.8   | 0.0268 |
| 3  | 294.0214  | 10372 | 631.4  | 15.4  | 0.0283 |
| 4  | 296.2574  | 8885  | 621.8  | 15.3  | 0.0333 |
| 5  | 338.3417  | 14993 | 230.7  | 6.7   | 0.0226 |
| 6  | 340.2823  | 14172 | 3401.5 | 100.0 | 0.0240 |
| 7  | 341.2869  | 16525 | 929.9  | 27.5  | 0.0207 |
| 8  | 353.2669  | 11369 | 236.4  | 7.4   | 0.0311 |
| 9  | 360.3223  | 10859 | 403.2  | 13.2  | 0.0332 |
| 10 | 369.1030  | 14600 | 247.6  | 8.5   | 0.0253 |
| 11 | 381.2983  | 8208  | 180.2  | 6.7   | 0.0465 |
| 12 | 384.3080  | 10249 | 844.2  | 32.0  | 0.0375 |
| 13 | 385.3151  | 12335 | 263.9  | 10.1  | 0.0312 |
| 14 | 428.3364  | 10966 | 184.1  | 8.3   | 0.0391 |
| 15 | 437.1958  | 11613 | 285.2  | 13.3  | 0.0376 |
| 16 | 553.4607  | 12377 | 210.3  | 13.9  | 0.0447 |
| 17 | 554.4616  | 11614 | 96.6   | 6.4   | 0.0477 |
| 18 | 591.4971  | 14122 | 172.2  | 12.9  | 0.0419 |
| 19 | 619.5283  | 12551 | 725.4  | 59.9  | 0.0494 |
| 20 | 620.5293  | 11284 | 253.9  | 21.1  | 0.0550 |
| 21 | 621.5327  | 11337 | 63.7   | 5.3   | 0.0548 |
| 22 | 647.5584  | 14811 | 621.8  | 56.7  | 0.0437 |
| 23 | 648.5639  | 10915 | 265.6  | 24.3  | 0.0594 |
| 24 | 659.2862  | 10645 | 70.8   | 6.8   | 0.0619 |
| 25 | 729.5564  | 15526 | 53.0   | 6.4   | 0.0470 |
| 26 | 949.8017  | 18294 | 28.5   | 5.8   | 0.0519 |
| 27 | 977.8360  | 16289 | 50.4   | 10.8  | 0.0600 |
| 28 | 978.8409  | 17253 | 34.4   | 7.4   | 0.0567 |
| 29 | 984.8824  | 24111 | 29.3   | 6.4   | 0.0408 |
| 30 | 1188.0237 | 10580 | 17.9   | 5.1   | 0.1123 |
| 31 | 1216.0580 | 15713 | 48.8   | 14.3  | 0.0774 |
| 32 | 1217.0678 | 14239 | 45.9   | 13.4  | 0.0855 |
| 33 | 1218.0715 | 13770 | 17.0   | 5.0   | 0.0885 |
| 34 | 1244.0867 | 10708 | 58.8   | 17.6  | 0.1162 |
| 35 | 1245.0953 | 9916  | 52.6   | 15.7  | 0.1256 |
| 36 | 1246.0938 | 9625  | 20.5   | 6.1   | 0.1295 |
| 37 | 1272.1183 | 15704 | 31.8   | 9.7   | 0.0810 |
| 38 | 1273.1400 | 11219 | 24.6   | 7.5   | 0.1135 |
| 39 | 1521.9702 | 11670 | 51.3   | 16.9  | 0.1304 |
| 40 | 1522.9661 | 10626 | 19.8   | 6.5   | 0.1433 |
|    |           |       |        |       |        |
| #  | m/z       | Res.  | S/N    | I %   | FWHM   |
| 1  | 288.0263  | 10161 |        | 1.8   | 0.0283 |
| 2  | 289.0296  | 10196 |        | 0.2   | 0.0283 |
| 3  | 290.0230  | 10231 |        | 18.8  | 0.0283 |
| 4  | 291.0240  | 10266 |        | 17.6  | 0.0283 |



---

| #  | m/z      | Res.  | S/N | I %   | FWHM   |
|----|----------|-------|-----|-------|--------|
| 5  | 292.0213 | 10302 |     | 49.8  | 0.0283 |
| 6  | 293.0243 | 10337 |     | 6.1   | 0.0283 |
| 7  | 294.0203 | 10372 |     | 100.0 | 0.0283 |
| 8  | 295.0235 | 10408 |     | 12.4  | 0.0283 |
| 9  | 296.0208 | 10443 |     | 18.4  | 0.0283 |
| 10 | 297.0239 | 10478 |     | 2.2   | 0.0283 |
| 11 | 298.0272 | 10513 |     | 0.2   | 0.0283 |



# Compound 3h

RAJAVEL/ZHOU GUAN

|             |                                                   |                       |                       |
|-------------|---------------------------------------------------|-----------------------|-----------------------|
| Method:     | 20190603-50_3000-pos.m                            | Acquisition Date:     | 6/14/2019 11:12:44 AM |
| File Name:  | D:\Data\IAC TEST\YSY\20190613\14_P1-A-9_01_9057.d | Operator:             | Shuyang Yang / XZ     |
| Source Type | ESI                                               | Ion Polarity          | Positive              |
| Focus       | Active                                            | Set Capillary         | 3500 V                |
| Scan Begin  | 50 m/z                                            | Set End Plate Offset  | -500 V                |
| Scan End    | 3000 m/z                                          | Set Collision Cell RF | 600.0 Vpp             |
|             |                                                   | Set Nebulizer         | 0.3 Bar               |
|             |                                                   | Set Dry Heater        | 180 °C                |
|             |                                                   | Set Dry Gas           | 4.0 l/min             |
|             |                                                   | Set Divert Valve      | Source                |

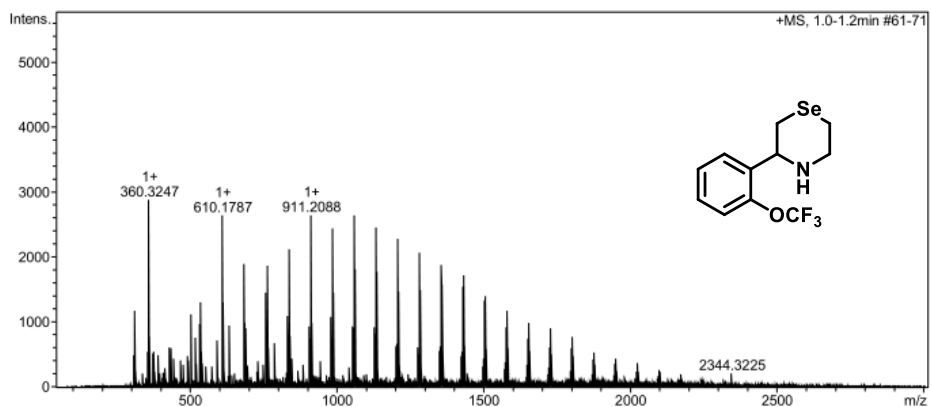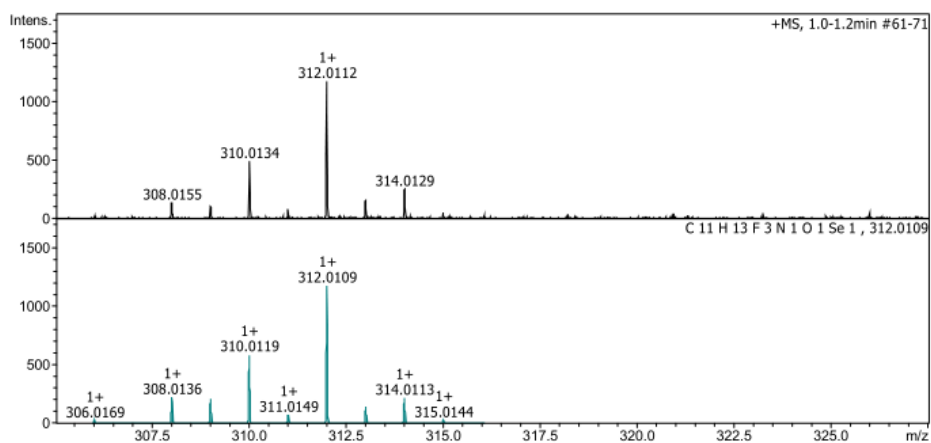



## Evaluation Spectra / Validation Formula:

| Meas. m/z  | # | Ion Formula  | Score  | m/z        | err [mDa] | err [ppm] | mSigma | rdb | e <sup>-</sup> Conf | N-Rule | Adduct |
|------------|---|--------------|--------|------------|-----------|-----------|--------|-----|---------------------|--------|--------|
| 312.011228 | 1 | C11H13F3NOSe | 100.00 | 312.010927 | 0.3       | 1.0       | 316.7  | 4.5 | even                | ok     | M+H    |

## Calibration Info:

Date: 6/14/2019 12:02:45 PM  
Polarity: Positive  
Calibration spectrum: +MS, 4.5-4.6min #270-273: Scan  
Reference mass list: ESI: Tuning Mix ES-TOF (ESI) (pos)  
Calibration mode: Enhanced Quadratic

| Reference m/z | Resulting m/z | Intensity | Error [ppm] |
|---------------|---------------|-----------|-------------|
| 118.0863      |               |           |             |
| 322.0481      | 322.0482      | 507       | 0.326       |
| 622.0290      | 622.0285      | 12348     | -0.677      |
| 922.0098      | 922.0095      | 30672     | -0.330      |
| 1221.9906     | 1221.9907     | 43714     | 0.083       |
| 1521.9715     | 1521.9739     | 44825     | 1.600       |
| 1821.9523     | 1821.9526     | 32872     | 0.136       |
| 2121.9332     | 2121.9321     | 39852     | -0.484      |
| 2421.9140     | 2421.9088     | 10198     | -2.143      |
| 2721.8948     | 2721.8989     | 2609      | 1.489       |

Standard deviation: 1.481

## Mass List:

| #  | m/z       | Res.  | S/N   | I %   | FWHM   |
|----|-----------|-------|-------|-------|--------|
| 1  | 360.3247  | 12288 | 261.7 | 100.0 | 0.0293 |
| 2  | 610.1787  | 13067 | 167.0 | 91.6  | 0.0467 |
| 3  | 611.1793  | 13041 | 102.2 | 56.1  | 0.0469 |
| 4  | 684.1977  | 12861 | 109.0 | 65.7  | 0.0532 |
| 5  | 758.2191  | 13953 | 76.5  | 50.5  | 0.0543 |
| 6  | 763.1709  | 13817 | 97.8  | 64.9  | 0.0552 |
| 7  | 837.1897  | 12112 | 102.5 | 74.0  | 0.0691 |
| 8  | 838.1883  | 13671 | 91.4  | 66.0  | 0.0613 |
| 9  | 839.1898  | 12402 | 73.3  | 53.0  | 0.0677 |
| 10 | 911.2088  | 14739 | 118.6 | 92.1  | 0.0618 |
| 11 | 912.2087  | 13311 | 95.9  | 74.6  | 0.0685 |
| 12 | 913.2070  | 14260 | 87.4  | 68.0  | 0.0640 |
| 13 | 985.2265  | 12580 | 94.0  | 78.0  | 0.0783 |
| 14 | 986.2273  | 13402 | 102.4 | 85.0  | 0.0736 |
| 15 | 987.2243  | 14337 | 98.4  | 81.7  | 0.0689 |
| 16 | 988.2234  | 15081 | 61.1  | 50.8  | 0.0655 |
| 17 | 1059.2473 | 12329 | 92.9  | 81.5  | 0.0859 |
| 18 | 1060.2449 | 13595 | 104.5 | 91.7  | 0.0780 |
| 19 | 1061.2467 | 12884 | 92.6  | 81.3  | 0.0824 |
| 20 | 1062.2425 | 14619 | 72.0  | 63.3  | 0.0727 |
| 21 | 1133.2641 | 13370 | 89.8  | 82.1  | 0.0848 |
| 22 | 1134.2642 | 13266 | 93.6  | 85.5  | 0.0855 |
| 23 | 1135.2658 | 14163 | 89.7  | 82.0  | 0.0802 |
| 24 | 1136.2610 | 14399 | 67.4  | 61.7  | 0.0789 |
| 25 | 1207.2860 | 13916 | 71.8  | 67.9  | 0.0868 |
| 26 | 1208.2824 | 14539 | 83.9  | 79.3  | 0.0831 |
| 27 | 1209.2795 | 12811 | 77.0  | 72.8  | 0.0944 |
| 28 | 1210.2783 | 11904 | 54.1  | 51.1  | 0.1017 |
| 29 | 1281.3030 | 14244 | 57.3  | 55.6  | 0.0900 |
| 30 | 1282.3040 | 14253 | 73.5  | 71.3  | 0.0900 |
| 31 | 1283.3007 | 15147 | 74.0  | 71.8  | 0.0847 |
| 32 | 1284.2959 | 13758 | 53.8  | 52.2  | 0.0934 |
| 33 | 1355.3227 | 14052 | 46.8  | 46.6  | 0.0965 |
| 34 | 1356.3231 | 14156 | 58.3  | 57.9  | 0.0958 |
| 35 | 1357.3167 | 15011 | 65.7  | 65.3  | 0.0904 |
| 36 | 1358.3153 | 15049 | 55.1  | 54.7  | 0.0903 |
| 37 | 1430.3356 | 14537 | 53.7  | 54.0  | 0.0984 |
| 38 | 1431.3375 | 14323 | 59.7  | 60.0  | 0.0999 |
| 39 | 1432.3376 | 15401 | 48.7  | 49.0  | 0.0930 |
| 40 | 1505.3553 | 13018 | 48.3  | 48.6  | 0.1156 |

| # | m/z      | Res.  | S/N | I %  | FWHM   |
|---|----------|-------|-----|------|--------|
| 1 | 306.0169 | 10979 |     | 1.8  | 0.0279 |
| 2 | 307.0202 | 11015 |     | 0.2  | 0.0279 |
| 3 | 308.0136 | 11051 |     | 18.8 | 0.0279 |
| 4 | 309.0146 | 11087 |     | 17.6 | 0.0279 |



RAJAVEL/ZHOU GUAN

---

| #  | m/z      | Res.  | S/N | I %   | FWHM   |
|----|----------|-------|-----|-------|--------|
| 5  | 310.0119 | 11122 |     | 49.8  | 0.0279 |
| 6  | 311.0149 | 11158 |     | 6.1   | 0.0279 |
| 7  | 312.0109 | 11194 |     | 100.0 | 0.0279 |
| 8  | 313.0141 | 11230 |     | 12.4  | 0.0279 |
| 9  | 314.0113 | 11266 |     | 18.4  | 0.0279 |
| 10 | 315.0144 | 11302 |     | 2.2   | 0.0279 |
| 11 | 316.0178 | 11338 |     | 0.2   | 0.0279 |



## Compound 3j

RAJAVEL/ZHOU GUAN

|             |                                         |                       |                      |
|-------------|-----------------------------------------|-----------------------|----------------------|
| Method:     | 20190614-50_3000-pos-ZHOUGUAN.m         | Acquisition Date:     | 6/14/2019 2:02:21 PM |
| File Name:  | D:\Data\IAC TEST\YSY\20190614\1-MAMUL.d | Operator:             | Shuyang Yang / XZ    |
| Source Type | ESI                                     | Ion Polarity          | Positive             |
| Focus       | Active                                  | Set Capillary         | 3000 V               |
| Scan Begin  | 50 m/z                                  | Set End Plate Offset  | -500 V               |
| Scan End    | 3000 m/z                                | Set Collision Cell RF | 500.0 Vpp            |
|             |                                         | Set Nebulizer         | 0.2 Bar              |
|             |                                         | Set Dry Heater        | 170 °C               |
|             |                                         | Set Dry Gas           | 3.0 l/min            |
|             |                                         | Set Divert Valve      | Source               |

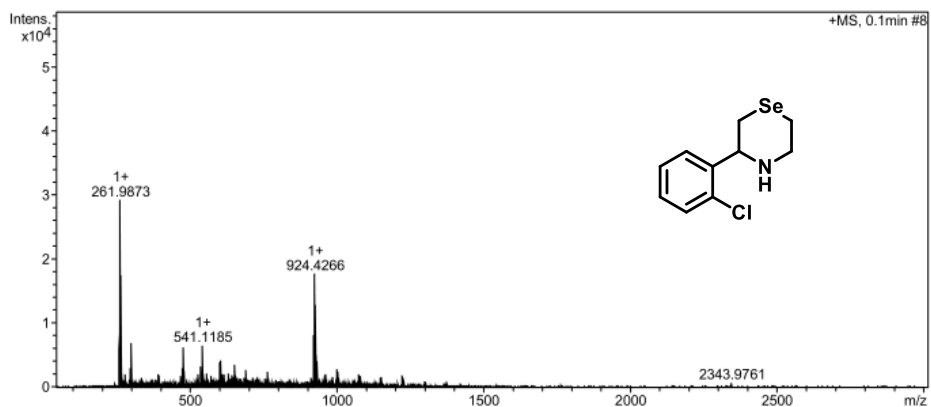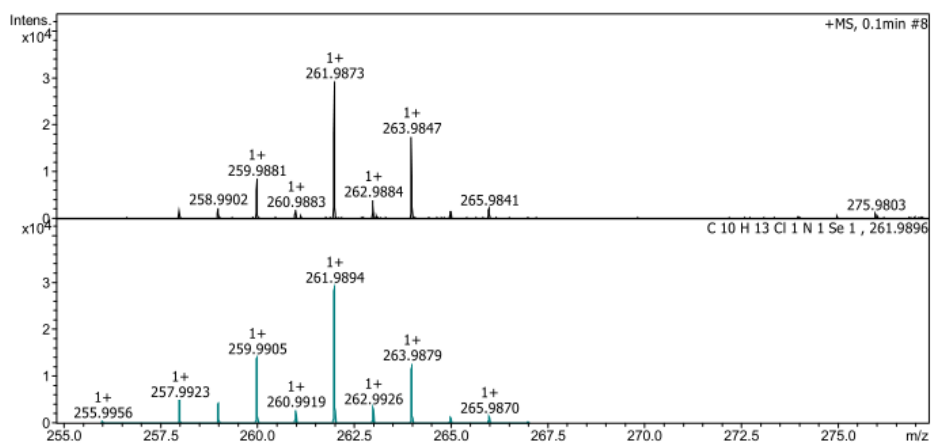



# RAJAVEL/ZHOU GUAN

## Evaluation Spectra / Validation Formula:

| Meas. m/z  | # | Ion Formula | Score | m/z        | err [mDa] | err [ppm] | mSigma | rdb | e <sup>-</sup> Conf | N-Rule | Adduct |
|------------|---|-------------|-------|------------|-----------|-----------|--------|-----|---------------------|--------|--------|
| 261.987310 | 1 | C10H13ClNSe | 38.79 | 261.989376 | 2.1       | 7.9       | 86.1   | 4.5 | even                | ok     | M+H    |

## Calibration Info:

Date: 6/14/2019 2:29:05 PM  
Polarity: Positive  
Calibration spectrum: +MS, 4.5-4.7min #270-279: Scan  
Reference mass list: ESI: Tuning Mix ES-TOF (ESI) (pos)  
Calibration mode: Enhanced Quadratic

| Reference m/z | Resulting m/z | Intensity | Error [ppm] |
|---------------|---------------|-----------|-------------|
| 118.0863      |               |           |             |
| 322.0481      |               |           |             |
| 622.0290      | 622.0289      | 15971     | -0.087      |
| 922.0098      | 922.0102      | 40359     | 0.406       |
| 1221.9906     | 1221.9898     | 49790     | -0.693      |
| 1521.9715     | 1521.9724     | 55249     | 0.596       |
| 1821.9523     | 1821.9516     | 38469     | -0.399      |
| 2121.9332     | 2121.9337     | 40176     | 0.272       |
| 2421.9140     | 2421.9138     | 9105      | -0.095      |
| 2721.8948     |               |           |             |

Standard deviation: 0.673

## Mass List:

| #  | m/z       | Res.  | S/N   | I %   | FWHM   |
|----|-----------|-------|-------|-------|--------|
| 1  | 258.9902  | 12640 | 11.6  | 8.0   | 0.0205 |
| 2  | 259.9881  | 11072 | 42.2  | 29.2  | 0.0235 |
| 3  | 261.9873  | 12128 | 144.5 | 100.0 | 0.0216 |
| 4  | 262.9884  | 12110 | 19.6  | 13.5  | 0.0217 |
| 5  | 263.9847  | 11812 | 86.1  | 59.7  | 0.0223 |
| 6  | 265.9841  | 9988  | 10.8  | 7.5   | 0.0266 |
| 7  | 295.9487  | 11330 | 15.0  | 10.5  | 0.0261 |
| 8  | 301.1380  | 11859 | 33.6  | 23.6  | 0.0254 |
| 9  | 475.1073  | 14022 | 13.4  | 10.2  | 0.0339 |
| 10 | 477.1060  | 12076 | 27.6  | 21.2  | 0.0395 |
| 11 | 479.1031  | 10680 | 11.5  | 8.8   | 0.0449 |
| 12 | 536.1639  | 13312 | 14.1  | 11.1  | 0.0403 |
| 13 | 541.1185  | 11810 | 28.5  | 22.5  | 0.0458 |
| 14 | 542.1220  | 12672 | 16.6  | 13.1  | 0.0428 |
| 15 | 543.1160  | 11427 | 12.2  | 9.7   | 0.0475 |
| 16 | 557.0900  | 14195 | 9.7   | 7.7   | 0.0392 |
| 17 | 600.9010  | 13358 | 11.4  | 9.2   | 0.0450 |
| 18 | 602.8938  | 12129 | 16.5  | 13.4  | 0.0497 |
| 19 | 604.8910  | 14882 | 17.8  | 14.5  | 0.0406 |
| 20 | 652.2629  | 11527 | 14.5  | 11.9  | 0.0566 |
| 21 | 689.1649  | 10955 | 11.4  | 9.4   | 0.0629 |
| 22 | 763.1781  | 8958  | 10.3  | 8.3   | 0.0852 |
| 23 | 920.4310  | 12769 | 12.6  | 9.5   | 0.0721 |
| 24 | 921.4299  | 13653 | 16.7  | 12.6  | 0.0675 |
| 25 | 922.4262  | 12658 | 37.1  | 28.0  | 0.0729 |
| 26 | 923.4349  | 15214 | 28.3  | 21.3  | 0.0607 |
| 27 | 924.4266  | 13497 | 80.6  | 60.7  | 0.0685 |
| 28 | 925.4281  | 14001 | 45.8  | 34.5  | 0.0661 |
| 29 | 926.1748  | 11033 | 12.3  | 9.2   | 0.0839 |
| 30 | 926.4286  | 18828 | 58.7  | 44.1  | 0.0492 |
| 31 | 927.1703  | 14663 | 12.7  | 9.6   | 0.0632 |
| 32 | 927.4277  | 15368 | 25.3  | 19.0  | 0.0603 |
| 33 | 928.1662  | 21362 | 30.4  | 22.9  | 0.0434 |
| 34 | 928.4319  | 12031 | 11.5  | 8.7   | 0.0772 |
| 35 | 929.1722  | 13207 | 17.6  | 13.2  | 0.0704 |
| 36 | 930.1687  | 12725 | 23.0  | 17.3  | 0.0731 |
| 37 | 931.1695  | 13512 | 15.0  | 11.3  | 0.0689 |
| 38 | 932.1687  | 13364 | 18.4  | 13.8  | 0.0698 |
| 39 | 1002.1657 | 11975 | 13.5  | 9.7   | 0.0837 |
| 40 | 1004.1726 | 13523 | 11.5  | 8.3   | 0.0743 |
| #  | m/z       | Res.  | S/N   | I %   | FWHM   |
| 1  | 255.9956  | 11850 |       | 1.5   | 0.0216 |
| 2  | 256.9989  | 11897 |       | 0.2   | 0.0216 |
| 3  | 257.9923  | 11943 |       | 16.8  | 0.0216 |
| 4  | 258.9933  | 11989 |       | 15.1  | 0.0216 |



RAJAVEL/ZHOU GUAN

---

| #  | m/z      | Res.  | S/N | I %   | FWHM   |
|----|----------|-------|-----|-------|--------|
| 5  | 259.9905 | 12035 |     | 48.0  | 0.0216 |
| 6  | 260.9919 | 12082 |     | 9.6   | 0.0216 |
| 7  | 261.9894 | 12128 |     | 100.0 | 0.0216 |
| 8  | 262.9926 | 12174 |     | 11.3  | 0.0216 |
| 9  | 263.9879 | 12220 |     | 43.3  | 0.0216 |
| 10 | 264.9910 | 12267 |     | 4.8   | 0.0216 |
| 11 | 265.9870 | 12313 |     | 5.1   | 0.0216 |
| 12 | 266.9902 | 12359 |     | 0.6   | 0.0216 |



# Compound 3k

## Acquisition Parameter

|             |                                           |                       |                      |
|-------------|-------------------------------------------|-----------------------|----------------------|
| Method:     | MS-MS.m                                   | Acquisition Date:     | 1/4/2019 12:13:12 PM |
| File Name:  | D:\Data\YSY\20190104\Z42_P1-B-5_01_8218.d | Operator:             | Shuyang Yang / XZ    |
| Source Type | ESI                                       | Ion Polarity          | Positive             |
| Focus       | Active                                    | Set Capillary         | 3500 V               |
| Scan Begin  | 50 m/z                                    | Set End Plate Offset  | -500 V               |
| Scan End    | 2800 m/z                                  | Set Collision Cell RF | 200.0 Vpp            |
|             |                                           | Set Nebulizer         | 0.8 Bar              |
|             |                                           | Set Dry Heater        | 200 °C               |
|             |                                           | Set Dry Gas           | 4.0 l/min            |
|             |                                           | Set Divert Valve      | Source               |

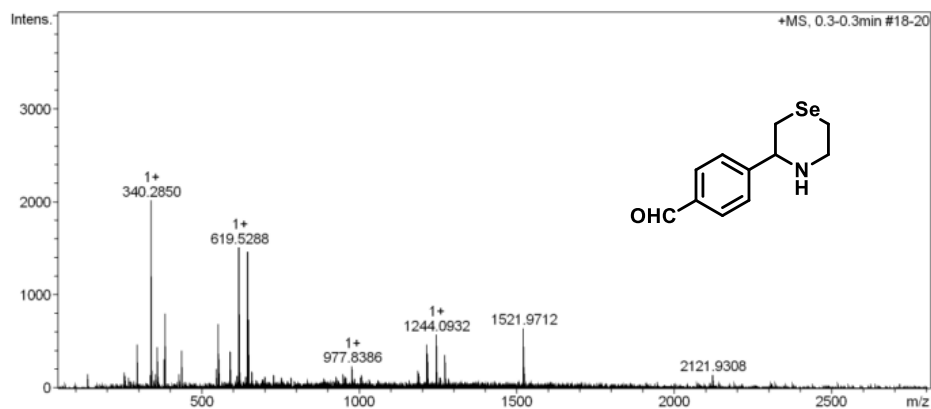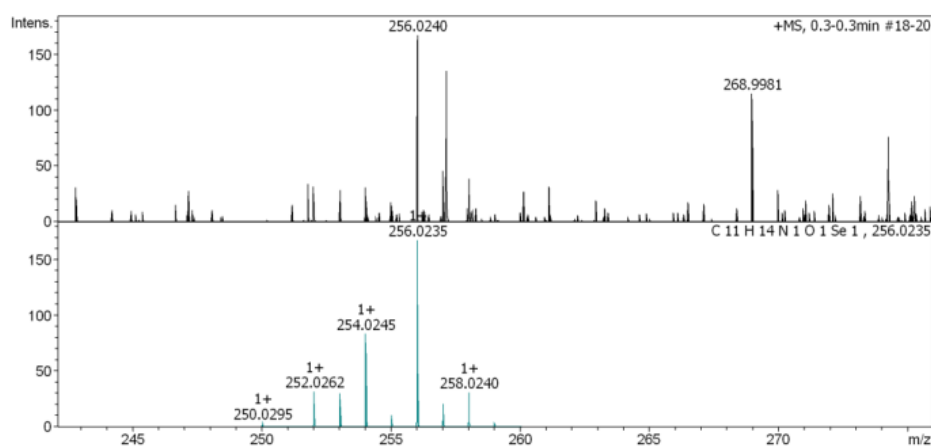



Evaluation Spectra / Validation Formula:

| Meas. m/z  | # | Ion Formula | m/z        | Adduct | err [mDa] | err [ppm] | mSigma | N-Rule | rdb | e <sup>-</sup> Conf | Score  |
|------------|---|-------------|------------|--------|-----------|-----------|--------|--------|-----|---------------------|--------|
| 256.023989 | 1 | C11H14NOSe  | 256.023542 | M+H    | 0.4       | 1.7       | 622.3  | ok     | 5.5 | even                | 100.00 |

Calibration Info:

Date: 1/8/2019 5:16:37 PM  
Polarity: Positive  
Calibration spectrum: +MS, 0.2min #9: Scan  
Reference mass list: ESI: Tuning Mix ES-TOF\_140 (ESI) (pos)  
Calibration mode: Quadratic

| Reference m/z | Resulting m/z | Intensity | Error [ppm] |
|---------------|---------------|-----------|-------------|
| 118.0863      |               |           |             |
| 322.0481      |               |           |             |
| 622.0290      |               |           |             |
| 922.0098      | 922.0097      | 216       | -0.112      |
| 1221.9906     |               |           |             |
| 1521.9715     | 1521.9717     | 5748      | 0.133       |
| 1821.9523     |               |           |             |
| 2121.9332     | 2121.9330     | 1351      | -0.049      |
| 2421.9140     |               |           |             |
| 2721.8948     |               |           |             |
| 140.0682      | 140.0682      | 1128      | 0.042       |

Standard deviation: 0.201

Mass List:

| #  | m/z       | Res.  | S/N    | I %   | FWHM   |
|----|-----------|-------|--------|-------|--------|
| 1  | 140.0681  | 12050 | 178.6  | 7.7   | 0.0116 |
| 2  | 256.0240  | 13801 | 110.8  | 8.3   | 0.0186 |
| 3  | 296.2595  | 13286 | 273.5  | 23.3  | 0.0223 |
| 4  | 338.3439  | 13445 | 72.5   | 7.1   | 0.0252 |
| 5  | 340.2850  | 11995 | 1011.8 | 100.0 | 0.0284 |
| 6  | 341.2869  | 20225 | 308.7  | 30.6  | 0.0169 |
| 7  | 353.2695  | 11827 | 70.8   | 7.4   | 0.0299 |
| 8  | 360.3256  | 14387 | 200.3  | 21.7  | 0.0250 |
| 9  | 381.3002  | 15132 | 129.2  | 15.3  | 0.0252 |
| 10 | 384.3078  | 13711 | 330.6  | 39.9  | 0.0280 |
| 11 | 385.3166  | 17875 | 85.5   | 10.4  | 0.0216 |
| 12 | 437.2000  | 18829 | 143.5  | 20.0  | 0.0232 |
| 13 | 438.2071  | 14155 | 59.2   | 8.3   | 0.0310 |
| 14 | 548.5048  | 14274 | 57.6   | 10.1  | 0.0384 |
| 15 | 553.4591  | 15135 | 193.0  | 34.5  | 0.0366 |
| 16 | 554.4699  | 15609 | 86.6   | 15.5  | 0.0355 |
| 17 | 591.4983  | 13169 | 100.0  | 19.5  | 0.0449 |
| 18 | 619.5288  | 11422 | 361.7  | 75.0  | 0.0542 |
| 19 | 620.5316  | 13131 | 160.4  | 33.4  | 0.0473 |
| 20 | 621.5382  | 12922 | 39.8   | 8.3   | 0.0481 |
| 21 | 647.5614  | 11495 | 329.1  | 72.8  | 0.0563 |
| 22 | 648.5642  | 12867 | 164.8  | 36.5  | 0.0504 |
| 23 | 649.5655  | 16844 | 53.7   | 11.9  | 0.0386 |
| 24 | 659.2929  | 17657 | 39.7   | 9.0   | 0.0373 |
| 25 | 949.8056  | 32463 | 20.3   | 7.5   | 0.0293 |
| 26 | 977.8386  | 12104 | 30.9   | 11.8  | 0.0808 |
| 27 | 978.8365  | 14812 | 22.8   | 8.8   | 0.0661 |
| 28 | 1188.0356 | 14488 | 20.8   | 9.6   | 0.0820 |
| 29 | 1189.0372 | 21573 | 17.6   | 8.1   | 0.0551 |
| 30 | 1216.0659 | 15411 | 49.8   | 23.3  | 0.0789 |
| 31 | 1217.0650 | 11609 | 34.9   | 16.3  | 0.1048 |
| 32 | 1218.0707 | 16747 | 19.0   | 8.9   | 0.0727 |
| 33 | 1244.0932 | 13755 | 60.4   | 28.7  | 0.0904 |
| 34 | 1245.0994 | 16204 | 54.9   | 26.0  | 0.0768 |
| 35 | 1246.0967 | 21905 | 25.2   | 12.0  | 0.0569 |
| 36 | 1272.1315 | 14849 | 30.6   | 14.7  | 0.0857 |
| 37 | 1273.1268 | 16204 | 36.9   | 17.7  | 0.0786 |
| 38 | 1521.9712 | 12244 | 64.3   | 32.2  | 0.1243 |
| 39 | 1522.9756 | 11691 | 22.3   | 11.2  | 0.1303 |
| 40 | 2121.9308 | 13438 | 19.6   | 7.1   | 0.1579 |
| #  | m/z       | Res.  | S/N    | I %   | FWHM   |
| 1  | 250.0295  | 13478 |        | 1.8   | 0.0186 |
| 2  | 251.0328  | 13532 |        | 0.2   | 0.0186 |
| 3  | 252.0262  | 13586 |        | 18.8  | 0.0186 |
| 4  | 253.0272  | 13640 |        | 17.6  | 0.0186 |



---

| #  | m/z      | Res.  | S/N | I %   | FWHM   |
|----|----------|-------|-----|-------|--------|
| 5  | 254.0245 | 13694 |     | 49.8  | 0.0186 |
| 6  | 255.0275 | 13748 |     | 6.1   | 0.0186 |
| 7  | 256.0235 | 13801 |     | 100.0 | 0.0186 |
| 8  | 257.0267 | 13856 |     | 12.4  | 0.0186 |
| 9  | 258.0240 | 13909 |     | 18.4  | 0.0186 |
| 10 | 259.0270 | 13963 |     | 2.2   | 0.0186 |
| 11 | 260.0304 | 14017 |     | 0.2   | 0.0186 |



# Compound 3l

## Acquisition Parameter

|             |                                           |                       |                      |
|-------------|-------------------------------------------|-----------------------|----------------------|
| Method:     | MS-MS.m                                   | Acquisition Date:     | 1/4/2019 12:48:22 PM |
| File Name:  | D:\Data\YSY\20190104\Z48_P1-C-2_01_8224.d | Operator:             | Shuyang Yang / XZ    |
| Source Type | ESI                                       | Ion Polarity          | Positive             |
| Focus       | Active                                    | Set Capillary         | 3500 V               |
| Scan Begin  | 50 m/z                                    | Set End Plate Offset  | -500 V               |
| Scan End    | 2800 m/z                                  | Set Collision Cell RF | 200.0 Vpp            |
|             |                                           | Set Nebulizer         | 0.8 Bar              |
|             |                                           | Set Dry Heater        | 200 °C               |
|             |                                           | Set Dry Gas           | 4.0 l/min            |
|             |                                           | Set Divert Valve      | Source               |

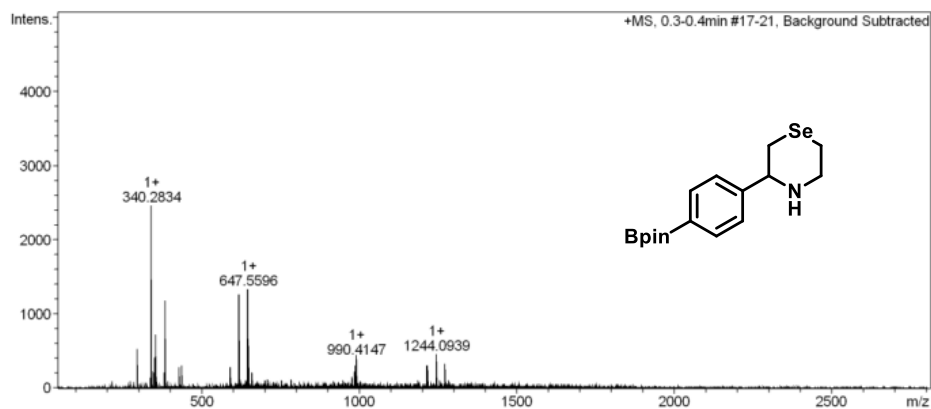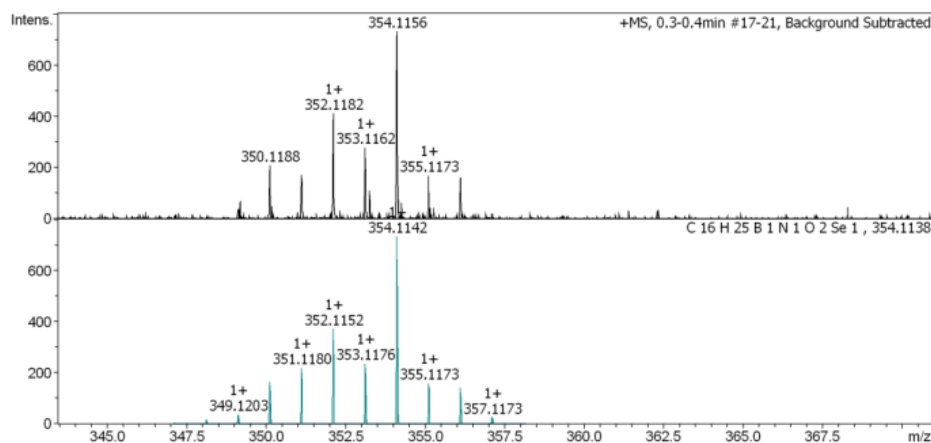



Evaluation Spectra / Validation Formula:

| Meas. m/z  | # | Ion Formula  | m/z        | Adduct | err [mDa] | err [ppm] | mSigma | N-Rule | rdb | e <sup>-</sup> Conf | Score  |
|------------|---|--------------|------------|--------|-----------|-----------|--------|--------|-----|---------------------|--------|
| 354.115636 | 1 | C16H25BNO2Se | 354.114167 | M+H    | -1.5      | -4.1      | 40.9   | ok     | 5.5 | even                | 100.00 |

Calibration Info:

Date: 1/8/2019 5:36:17 PM  
Polarity: Positive  
Calibration spectrum: +MS, 0.2-0.2min #9-11: Scan  
Reference mass list: ESI: Tuning Mix ES-TOF\_140 (ESI) (pos)  
Calibration mode: Quadratic

| Reference m/z | Resulting m/z | Intensity | Error [ppm] |
|---------------|---------------|-----------|-------------|
| 118.0863      |               |           |             |
| 322.0481      |               |           |             |
| 622.0290      |               |           |             |
| 922.0098      | 922.0101      | 555       | 0.338       |
| 1221.9906     |               |           |             |
| 1521.9715     | 1521.9709     | 7664      | -0.399      |
| 1821.9523     |               |           |             |
| 2121.9332     | 2121.9335     | 1793      | 0.148       |
| 2421.9140     |               |           |             |
| 2721.8948     |               |           |             |
| 140.0682      | 140.0682      | 1507      | -0.126      |

Standard deviation: 0.605

Mass List:

| #  | m/z       | Res.  | S/N    | I %   | FWHM   |
|----|-----------|-------|--------|-------|--------|
| 1  | 296.2557  | 15147 | 286.2  | 21.8  | 0.0196 |
| 2  | 297.2570  | 13204 | 67.1   | 5.1   | 0.0225 |
| 3  | 338.3427  | 9095  | 67.2   | 5.6   | 0.0372 |
| 4  | 340.2834  | 11996 | 1186.8 | 100.0 | 0.0284 |
| 5  | 341.2864  | 11700 | 235.8  | 19.9  | 0.0292 |
| 6  | 350.1188  | 14867 | 97.7   | 8.5   | 0.0235 |
| 7  | 351.1181  | 9599  | 80.1   | 7.0   | 0.0366 |
| 8  | 352.1182  | 12672 | 191.3  | 16.7  | 0.0278 |
| 9  | 353.1162  | 11062 | 128.8  | 11.3  | 0.0319 |
| 10 | 354.1156  | 13155 | 338.6  | 29.9  | 0.0269 |
| 11 | 355.1173  | 16882 | 77.6   | 6.9   | 0.0210 |
| 12 | 356.1162  | 15669 | 73.5   | 6.5   | 0.0227 |
| 13 | 381.2984  | 14261 | 87.8   | 8.5   | 0.0267 |
| 14 | 384.3104  | 12052 | 494.6  | 48.2  | 0.0319 |
| 15 | 385.3182  | 19753 | 132.9  | 13.0  | 0.0195 |
| 16 | 428.3363  | 12369 | 105.7  | 11.5  | 0.0346 |
| 17 | 437.1966  | 11122 | 111.0  | 12.4  | 0.0393 |
| 18 | 591.5094  | 16024 | 75.1   | 11.5  | 0.0369 |
| 19 | 619.5291  | 11642 | 315.3  | 51.5  | 0.0532 |
| 20 | 620.5322  | 16387 | 138.9  | 22.8  | 0.0379 |
| 21 | 647.5596  | 14807 | 309.3  | 54.3  | 0.0437 |
| 22 | 648.5642  | 15379 | 132.2  | 23.3  | 0.0422 |
| 23 | 649.5750  | 22623 | 36.8   | 6.5   | 0.0287 |
| 24 | 659.2905  | 10713 | 47.0   | 8.5   | 0.0615 |
| 25 | 783.5361  | 15835 | 21.2   | 5.0   | 0.0495 |
| 26 | 976.5813  | 19863 | 17.4   | 5.6   | 0.0492 |
| 27 | 977.8418  | 12102 | 19.2   | 6.1   | 0.0808 |
| 28 | 987.4170  | 14059 | 28.1   | 9.1   | 0.0702 |
| 29 | 988.4164  | 12923 | 38.0   | 12.3  | 0.0765 |
| 30 | 989.4119  | 18618 | 33.9   | 11.0  | 0.0531 |
| 31 | 990.4147  | 11733 | 51.1   | 16.6  | 0.0844 |
| 32 | 991.4196  | 11769 | 22.7   | 7.4   | 0.0842 |
| 33 | 992.4120  | 12420 | 21.5   | 7.0   | 0.0799 |
| 34 | 1216.0652 | 14217 | 31.8   | 12.6  | 0.0855 |
| 35 | 1217.0674 | 16495 | 31.4   | 12.5  | 0.0738 |
| 36 | 1244.0939 | 11797 | 46.6   | 18.9  | 0.1055 |
| 37 | 1245.1049 | 13768 | 38.1   | 15.5  | 0.0904 |
| 38 | 1246.1023 | 12179 | 17.6   | 7.1   | 0.1023 |
| 39 | 1272.1271 | 25680 | 32.4   | 13.3  | 0.0495 |
| 40 | 1273.1310 | 13327 | 28.0   | 11.5  | 0.0955 |
| #  | m/z       | Res.  | S/N    | I %   | FWHM   |
| 1  | 347.1234  | 12895 |        | 0.4   | 0.0269 |
| 2  | 348.1198  | 12932 |        | 1.8   | 0.0269 |
| 3  | 349.1203  | 12969 |        | 4.8   | 0.0269 |
| 4  | 350.1174  | 13006 |        | 22.4  | 0.0269 |



---

| #  | m/z      | Res.  | S/N | I %   | FWHM   |
|----|----------|-------|-----|-------|--------|
| 5  | 351.1180 | 13043 |     | 29.8  | 0.0269 |
| 6  | 352.1152 | 13080 |     | 50.5  | 0.0269 |
| 7  | 353.1176 | 13117 |     | 32.2  | 0.0269 |
| 8  | 354.1142 | 13154 |     | 100.0 | 0.0269 |
| 9  | 355.1173 | 13192 |     | 21.7  | 0.0269 |
| 10 | 356.1148 | 13229 |     | 19.3  | 0.0269 |
| 11 | 357.1173 | 13266 |     | 3.2   | 0.0269 |
| 12 | 358.1207 | 13303 |     | 0.3   | 0.0269 |



# Compound 3m

RAJAVEL/ZHOU GUAN

|             |                                         |                       |                      |
|-------------|-----------------------------------------|-----------------------|----------------------|
| Method:     | 20190614-50_3000-pos-ZHOUGUAN.m         | Acquisition Date:     | 6/14/2019 2:10:09 PM |
| File Name:  | D:\Data\IAC TEST\YSY\20190614\9-MAMUL.d | Operator:             | Shuyang Yang / XZ    |
| Source Type | ESI                                     | Ion Polarity          | Positive             |
| Focus       | Active                                  | Set Capillary         | 3000 V               |
| Scan Begin  | 50 m/z                                  | Set End Plate Offset  | -500 V               |
| Scan End    | 3000 m/z                                | Set Collision Cell RF | 500.0 Vpp            |
|             |                                         | Set Nebulizer         | 0.2 Bar              |
|             |                                         | Set Dry Heater        | 170 °C               |
|             |                                         | Set Dry Gas           | 3.0 l/min            |
|             |                                         | Set Divert Valve      | Source               |

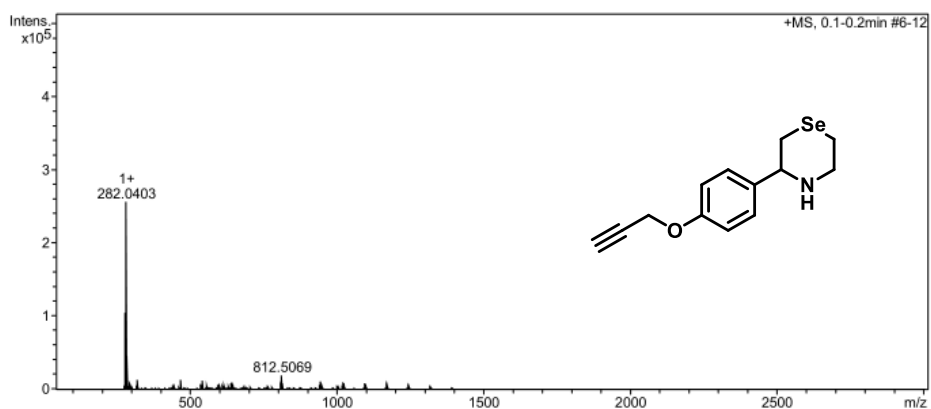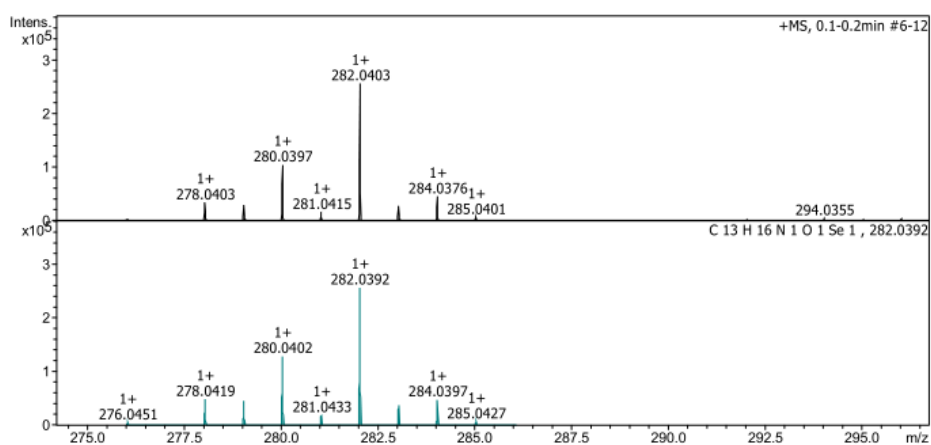



# RAJAVEL/ZHOU GUAN

## Evaluation Spectra / Validation Formula:

| Meas. m/z  | # | Ion Formula | Score  | m/z        | err [mDa] | err [ppm] | mSigma | rdb | e <sup>-</sup> Conf | N-Rule | Adduct |
|------------|---|-------------|--------|------------|-----------|-----------|--------|-----|---------------------|--------|--------|
| 282.040263 | 1 | C13H16NOSe  | 100.00 | 282.039203 | 1.1       | 3.8       | 43.7   | 6.5 | even                | ok     | M+H    |

## Calibration Info:

Date: 6/14/2019 2:32:06 PM  
Polarity: Positive  
Calibration spectrum: +MS, 4.5-4.7min #270-279: Scan  
Reference mass list: ESI: Tuning Mix ES-TOF (ESI) (pos)  
Calibration mode: Enhanced Quadratic

| Reference m/z | Resulting m/z | Intensity | Error [ppm] |
|---------------|---------------|-----------|-------------|
| 118.0863      |               |           |             |
| 322.0481      |               |           |             |
| 622.0290      | 622.0289      | 15971     | -0.087      |
| 922.0098      | 922.0102      | 40359     | 0.406       |
| 1221.9906     | 1221.9898     | 49790     | -0.693      |
| 1521.9715     | 1521.9724     | 55249     | 0.596       |
| 1821.9523     | 1821.9516     | 38469     | -0.399      |
| 2121.9332     | 2121.9337     | 40176     | 0.272       |
| 2421.9140     | 2421.9138     | 9105      | -0.095      |
| 2721.8948     |               |           |             |

Standard deviation: 0.673

## Mass List:

| #  | m/z       | Res.  | S/N    | I %   | FWHM   |
|----|-----------|-------|--------|-------|--------|
| 1  | 278.0403  | 13436 | 1006.5 | 13.3  | 0.0207 |
| 2  | 279.0414  | 11314 | 888.1  | 11.8  | 0.0247 |
| 3  | 280.0397  | 13321 | 3069.0 | 40.8  | 0.0210 |
| 4  | 281.0415  | 13311 | 483.0  | 6.4   | 0.0211 |
| 5  | 282.0403  | 17230 | 7512.5 | 100.0 | 0.0164 |
| 6  | 283.0407  | 10994 | 823.7  | 11.0  | 0.0257 |
| 7  | 284.0376  | 13254 | 1328.0 | 17.7  | 0.0214 |
| 8  | 285.0401  | 11123 | 181.7  | 2.4   | 0.0256 |
| 9  | 320.0703  | 11354 | 154.4  | 2.3   | 0.0282 |
| 10 | 322.0692  | 13309 | 362.5  | 5.3   | 0.0242 |
| 11 | 445.1198  | 12075 | 140.5  | 2.8   | 0.0369 |
| 12 | 467.1020  | 13454 | 244.9  | 5.0   | 0.0347 |
| 13 | 468.1023  | 12596 | 101.2  | 2.1   | 0.0372 |
| 14 | 536.1648  | 12907 | 115.9  | 2.8   | 0.0415 |
| 15 | 541.1197  | 12450 | 195.5  | 4.7   | 0.0435 |
| 16 | 542.1206  | 12804 | 103.8  | 2.5   | 0.0423 |
| 17 | 543.1172  | 13196 | 83.1   | 2.0   | 0.0412 |
| 18 | 597.0664  | 11694 | 82.7   | 2.3   | 0.0511 |
| 19 | 599.0645  | 12763 | 98.1   | 2.7   | 0.0469 |
| 20 | 615.1166  | 5603  | 70.7   | 2.0   | 0.1098 |
| 21 | 640.9978  | 13196 | 106.8  | 3.2   | 0.0486 |
| 22 | 642.9965  | 11784 | 122.6  | 3.7   | 0.0546 |
| 23 | 644.9928  | 12743 | 96.2   | 2.9   | 0.0506 |
| 24 | 810.5048  | 13299 | 106.2  | 3.6   | 0.0609 |
| 25 | 812.5069  | 14696 | 221.4  | 7.5   | 0.0553 |
| 26 | 813.5075  | 13167 | 105.4  | 3.6   | 0.0618 |
| 27 | 814.5051  | 13476 | 70.1   | 2.4   | 0.0604 |
| 28 | 942.4794  | 14123 | 74.5   | 2.4   | 0.0667 |
| 29 | 944.4767  | 14130 | 133.5  | 4.3   | 0.0668 |
| 30 | 945.4810  | 15953 | 91.2   | 3.0   | 0.0593 |
| 31 | 948.1977  | 13915 | 71.2   | 2.3   | 0.0681 |
| 32 | 1020.2156 | 13638 | 68.8   | 2.1   | 0.0748 |
| 33 | 1022.2158 | 14072 | 125.0  | 3.8   | 0.0726 |
| 34 | 1023.2160 | 14124 | 103.8  | 3.2   | 0.0724 |
| 35 | 1024.2167 | 13794 | 94.9   | 2.9   | 0.0743 |
| 36 | 1096.2337 | 13920 | 114.5  | 3.2   | 0.0788 |
| 37 | 1097.2334 | 14020 | 95.4   | 2.7   | 0.0783 |
| 38 | 1098.2342 | 13519 | 87.6   | 2.5   | 0.0812 |
| 39 | 1170.2519 | 13678 | 79.2   | 2.1   | 0.0856 |
| 40 | 1171.2488 | 15236 | 77.2   | 2.0   | 0.0769 |
| #  | m/z       | Res.  | S/N    | I %   | FWHM   |
| 1  | 276.0451  | 16864 |        | 1.8   | 0.0164 |
| 2  | 277.0485  | 16925 |        | 0.3   | 0.0164 |
| 3  | 278.0419  | 16986 |        | 18.8  | 0.0164 |
| 4  | 279.0429  | 17047 |        | 18.0  | 0.0164 |



RAJAVEL/ZHOU GUAN

---

| #  | m/z      | Res.  | S/N | I %   | FWHM   |
|----|----------|-------|-----|-------|--------|
| 5  | 280.0402 | 17108 |     | 50.1  | 0.0164 |
| 6  | 281.0433 | 17169 |     | 7.1   | 0.0164 |
| 7  | 282.0392 | 17230 |     | 100.0 | 0.0164 |
| 8  | 283.0424 | 17291 |     | 14.5  | 0.0164 |
| 9  | 284.0397 | 17352 |     | 18.7  | 0.0164 |
| 10 | 285.0427 | 17414 |     | 2.6   | 0.0164 |
| 11 | 286.0460 | 17475 |     | 0.2   | 0.0164 |



# Compound 3n

RAJAVEL/ZHOU GUAN

|             |                                                  |                       |                      |
|-------------|--------------------------------------------------|-----------------------|----------------------|
| Method:     | 20190603-50_3000-pos.m                           | Acquisition Date:     | 6/6/2019 11:03:37 AM |
| File Name:  | D:\Data\IAC                                      | Operator:             | Shuyang Yang / XZ    |
| Source Type | TEST\YSY\20190605\ZHOU GUAN-2\6_P1-B-6_01_9015.d |                       |                      |
| Focus       | Active                                           | Ion Polarity          | Positive             |
| Scan Begin  | 50 m/z                                           | Set Capillary         | 3500 V               |
| Scan End    | 3000 m/z                                         | Set End Plate Offset  | -500 V               |
|             |                                                  | Set Collision Cell RF | 600.0 Vpp            |
|             |                                                  | Set Nebulizer         | 0.3 Bar              |
|             |                                                  | Set Dry Heater        | 180 °C               |
|             |                                                  | Set Dry Gas           | 4.0 l/min            |
|             |                                                  | Set Divert Valve      | Source               |

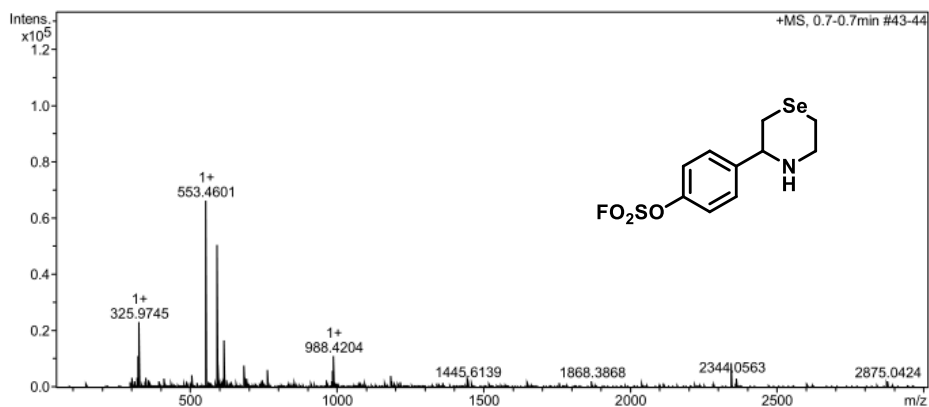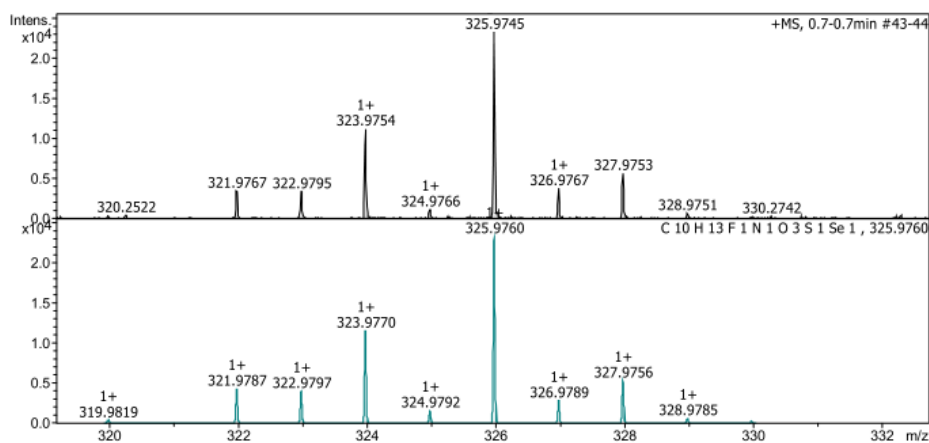



## Evaluation Spectra / Validation Formula:

| Meas. m/z  | # | Ion Formula                 | m/z        | Adduct | err [mDa] | err [ppm] | mSigma | N-Rule | rdb | e <sup>-</sup> Conf | Score  |
|------------|---|-----------------------------|------------|--------|-----------|-----------|--------|--------|-----|---------------------|--------|
| 325.974461 | 1 | C10H13FNO3S <sup>+</sup> Se | 325.975959 | M+H    | 1.5       | 4.6       | 21.1   | ok     | 4.5 | even                | 100.00 |

## Calibration Info:

Date: 6/10/2019 3:51:10 PM  
Polarity: Positive  
Calibration spectrum: +MS, 4.6-4.6min #271-273: Scan  
Reference mass list: ESI: Tuning Mix ES-TOF (ESI) (pos)  
Calibration mode: Enhanced Quadratic

| Reference m/z | Resulting m/z | Intensity | Error [ppm] |
|---------------|---------------|-----------|-------------|
| 118.0863      |               |           |             |
| 322.0481      | 322.0482      | 487       | 0.193       |
| 622.0290      | 622.0287      | 15004     | -0.412      |
| 922.0098      | 922.0093      | 36651     | -0.582      |
| 1221.9906     | 1221.9921     | 49392     | 1.232       |
| 1521.9715     | 1521.9725     | 48506     | 0.658       |
| 1821.9523     | 1821.9499     | 33053     | -1.328      |
| 2121.9332     | 2121.9328     | 43952     | -0.170      |
| 2421.9140     | 2421.9149     | 11148     | 0.364       |
| 2721.8948     | 2721.8949     | 3180      | 0.044       |

Standard deviation: 0.970

## Mass List:

| #  | m/z       | Res.  | S/N   | I %   | FWHM   |
|----|-----------|-------|-------|-------|--------|
| 1  | 304.2604  | 10412 | 61.7  | 5.2   | 0.0292 |
| 2  | 312.3236  | 10553 | 40.6  | 3.5   | 0.0296 |
| 3  | 321.9767  | 11324 | 59.1  | 5.2   | 0.0284 |
| 4  | 322.9795  | 11642 | 58.3  | 5.1   | 0.0277 |
| 5  | 323.9754  | 11944 | 191.8 | 16.9  | 0.0271 |
| 6  | 325.9745  | 11634 | 396.3 | 35.0  | 0.0280 |
| 7  | 326.9767  | 14226 | 64.3  | 5.7   | 0.0230 |
| 8  | 327.9753  | 10821 | 96.6  | 8.6   | 0.0303 |
| 9  | 350.9711  | 11554 | 55.1  | 5.1   | 0.0304 |
| 10 | 360.3207  | 13415 | 42.0  | 3.9   | 0.0269 |
| 11 | 413.2649  | 12386 | 49.3  | 4.9   | 0.0334 |
| 12 | 507.2729  | 13750 | 62.5  | 6.8   | 0.0369 |
| 13 | 553.4601  | 14921 | 873.2 | 100.0 | 0.0371 |
| 14 | 554.4627  | 13478 | 295.3 | 33.9  | 0.0411 |
| 15 | 555.4621  | 13352 | 71.8  | 8.2   | 0.0416 |
| 16 | 592.9968  | 14708 | 648.9 | 76.3  | 0.0403 |
| 17 | 593.9969  | 14374 | 176.0 | 20.7  | 0.0413 |
| 18 | 594.9936  | 11778 | 103.7 | 12.2  | 0.0505 |
| 19 | 614.9778  | 12976 | 213.2 | 25.4  | 0.0474 |
| 20 | 615.9804  | 12527 | 64.6  | 7.7   | 0.0492 |
| 21 | 616.9736  | 12143 | 44.1  | 5.3   | 0.0508 |
| 22 | 626.4362  | 30026 | 33.4  | 4.0   | 0.0209 |
| 23 | 685.4331  | 13122 | 93.5  | 11.5  | 0.0522 |
| 24 | 686.4384  | 13131 | 40.8  | 5.0   | 0.0523 |
| 25 | 694.2024  | 33788 | 36.2  | 4.5   | 0.0205 |
| 26 | 745.9750  | 13603 | 27.7  | 3.5   | 0.0548 |
| 27 | 747.9749  | 13419 | 29.2  | 3.7   | 0.0557 |
| 28 | 763.2391  | 21552 | 47.7  | 6.0   | 0.0354 |
| 29 | 763.5899  | 36189 | 30.4  | 3.9   | 0.0211 |
| 30 | 966.6986  | 14903 | 30.6  | 4.0   | 0.0649 |
| 31 | 985.4246  | 11476 | 28.6  | 3.7   | 0.0859 |
| 32 | 986.4214  | 13232 | 66.5  | 8.7   | 0.0745 |
| 33 | 987.4177  | 15093 | 46.1  | 6.0   | 0.0654 |
| 34 | 988.4204  | 13659 | 129.4 | 16.9  | 0.0724 |
| 35 | 989.4210  | 13080 | 67.2  | 8.8   | 0.0756 |
| 36 | 990.4187  | 12831 | 44.5  | 5.8   | 0.0772 |
| 37 | 1184.9764 | 15232 | 47.8  | 6.1   | 0.0778 |
| 38 | 1445.6139 | 32977 | 30.9  | 3.7   | 0.0438 |
| 39 | 2344.0563 | 13191 | 76.7  | 6.4   | 0.1777 |
| 40 | 2875.0424 | 76270 | 56.4  | 3.4   | 0.0377 |
| #  | m/z       | Res.  | S/N   | I %   | FWHM   |
| 1  | 319.9819  | 11421 |       | 1.7   | 0.0280 |
| 2  | 320.9853  | 11456 |       | 0.2   | 0.0280 |
| 3  | 321.9787  | 11492 |       | 18.5  | 0.0280 |
| 4  | 322.9797  | 11528 |       | 17.2  | 0.0280 |



RAJAVEL/ZHOU GUAN

| #  | m/z      | Res.  | S/N | I %   | FWHM   |
|----|----------|-------|-----|-------|--------|
| 5  | 323.9770 | 11563 |     | 49.5  | 0.0280 |
| 6  | 324.9792 | 11599 |     | 6.7   | 0.0280 |
| 7  | 325.9760 | 11634 |     | 100.0 | 0.0280 |
| 8  | 326.9789 | 11670 |     | 12.2  | 0.0280 |
| 9  | 327.9756 | 11706 |     | 22.7  | 0.0280 |
| 10 | 328.9785 | 11742 |     | 2.7   | 0.0280 |
| 11 | 329.9730 | 11777 |     | 1.0   | 0.0280 |



# Compound 3o

RAJAVEL/ZHOU GUAN

|             |                        |                       |                     |
|-------------|------------------------|-----------------------|---------------------|
| Method:     | 20190603-50_3000-pos.m | Acquisition Date:     | 6/6/2019 9:49:31 AM |
| File Name:  | D:\Data\IAC            | Operator:             | Shuyang Yang / XZ   |
| Source Type | ESI                    | Ion Polarity          | Positive            |
| Focus       | Active                 | Set Capillary         | 3500 V              |
| Scan Begin  | 50 m/z                 | Set End Plate Offset  | -500 V              |
| Scan End    | 3000 m/z               | Set Collision Cell RF | 600.0 Vpp           |
|             |                        | Set Nebulizer         | 0.3 Bar             |
|             |                        | Set Dry Heater        | 180 °C              |
|             |                        | Set Dry Gas           | 4.0 l/min           |
|             |                        | Set Divert Valve      | Source              |

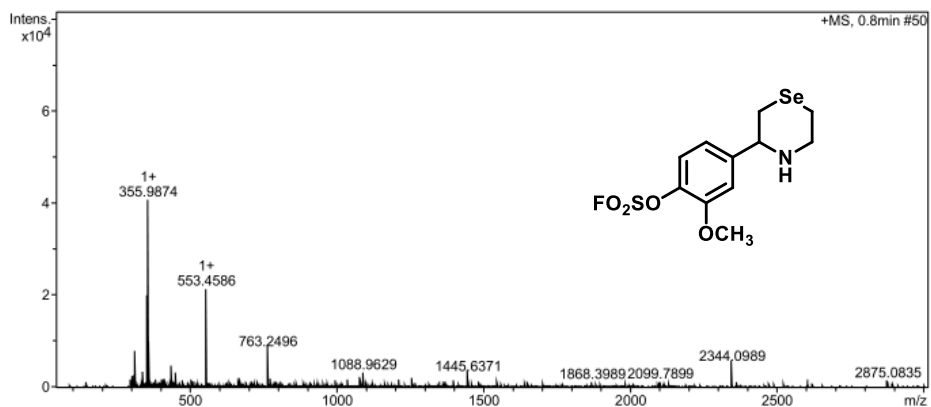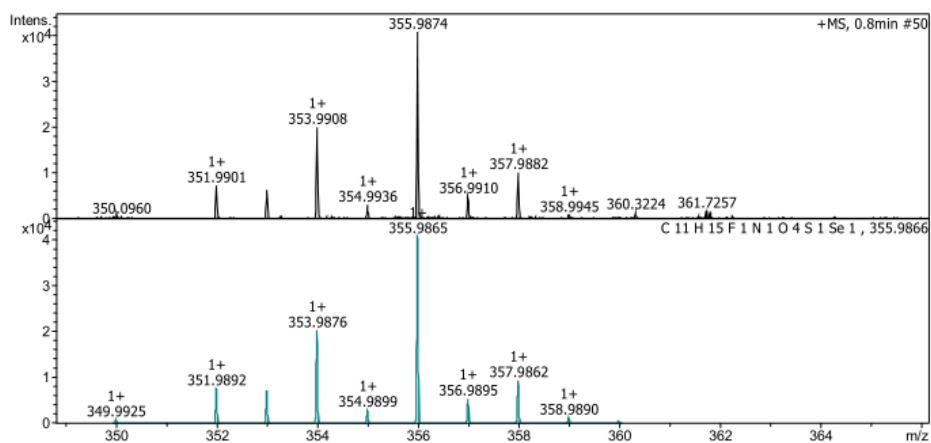



## Evaluation Spectra / Validation Formula:

| Meas. m/z  | # | Ion Formula                 | m/z        | Adduct | err [mDa] | err [ppm] | mSigma | N-Rule | rdb | e <sup>-</sup> Conf | Score |
|------------|---|-----------------------------|------------|--------|-----------|-----------|--------|--------|-----|---------------------|-------|
| 355.987415 | 1 | C11H15FNO4S <sup>+</sup> Se | 355.986534 | M+H    | 0.9       | 2.5       | 10.1   | ok     | 4.5 | even                | 90.60 |

## Calibration Info:

Date: 6/10/2019 3:59:27 PM  
Polarity: Positive  
Calibration spectrum: +MS, 4.5-4.6min #269-273: Scan  
Reference mass list: ESI: Tuning Mix ES-TOF (ESI) (pos)  
Calibration mode: Enhanced Quadratic

| Reference m/z | Resulting m/z | Intensity | Error [ppm] |
|---------------|---------------|-----------|-------------|
| 118.0863      |               |           |             |
| 322.0481      |               |           |             |
| 622.0290      | 622.0290      | 13455     | 0.004       |
| 922.0098      | 922.0096      | 29439     | -0.178      |
| 1221.9906     | 1221.9911     | 34620     | 0.351       |
| 1521.9715     | 1521.9721     | 34084     | 0.398       |
| 1821.9523     | 1821.9502     | 22080     | -1.140      |
| 2121.9332     | 2121.9333     | 27929     | 0.090       |
| 2421.9140     | 2421.9163     | 6421      | 0.937       |
| 2721.8948     | 2721.8936     | 2011      | -0.461      |

Standard deviation: 0.853

## Mass List:

| #  | m/z       | Res.  | S/N   | I %   | FWHM   |
|----|-----------|-------|-------|-------|--------|
| 1  | 296.9607  | 25659 | 13.0  | 4.1   | 0.0116 |
| 2  | 297.1782  | 25757 | 12.8  | 4.0   | 0.0115 |
| 3  | 303.0044  | 8478  | 19.7  | 6.2   | 0.0357 |
| 4  | 308.9353  | 11794 | 21.2  | 6.7   | 0.0262 |
| 5  | 310.9321  | 16522 | 62.0  | 19.6  | 0.0188 |
| 6  | 312.9311  | 13204 | 16.5  | 5.2   | 0.0237 |
| 7  | 336.9600  | 12735 | 14.4  | 4.6   | 0.0265 |
| 8  | 338.9615  | 9969  | 25.8  | 8.3   | 0.0340 |
| 9  | 351.9901  | 11865 | 55.5  | 17.9  | 0.0297 |
| 10 | 352.9935  | 11487 | 48.5  | 15.7  | 0.0307 |
| 11 | 353.9908  | 12411 | 151.8 | 49.1  | 0.0285 |
| 12 | 354.9936  | 14987 | 22.9  | 7.4   | 0.0237 |
| 13 | 355.9874  | 12951 | 308.8 | 100.0 | 0.0275 |
| 14 | 356.9910  | 10931 | 37.1  | 12.0  | 0.0327 |
| 15 | 357.9882  | 12671 | 76.8  | 24.9  | 0.0283 |
| 16 | 361.7257  | 29278 | 13.0  | 4.2   | 0.0124 |
| 17 | 381.2971  | 11224 | 12.7  | 4.1   | 0.0340 |
| 18 | 405.9605  | 18119 | 13.7  | 4.4   | 0.0224 |
| 19 | 413.2643  | 16589 | 15.1  | 4.8   | 0.0249 |
| 20 | 437.1939  | 14935 | 37.0  | 11.8  | 0.0293 |
| 21 | 450.0139  | 12124 | 24.6  | 7.9   | 0.0371 |
| 22 | 553.4586  | 12608 | 162.8 | 52.4  | 0.0439 |
| 23 | 554.4596  | 15535 | 76.9  | 24.8  | 0.0357 |
| 24 | 555.4611  | 12254 | 15.4  | 5.0   | 0.0453 |
| 25 | 666.9752  | 20797 | 16.9  | 5.4   | 0.0321 |
| 26 | 763.2496  | 41052 | 64.3  | 20.2  | 0.0186 |
| 27 | 763.2853  | 33968 | 42.5  | 13.3  | 0.0225 |
| 28 | 763.6000  | 37274 | 17.0  | 5.3   | 0.0205 |
| 29 | 772.9503  | 20344 | 15.0  | 4.7   | 0.0380 |
| 30 | 1035.3360 | 48241 | 14.1  | 4.1   | 0.0215 |
| 31 | 1077.4405 | 34226 | 18.7  | 5.4   | 0.0315 |
| 32 | 1077.8313 | 46108 | 18.4  | 5.3   | 0.0234 |
| 33 | 1088.9629 | 44099 | 27.0  | 7.8   | 0.0247 |
| 34 | 1210.5751 | 53545 | 15.8  | 4.4   | 0.0226 |
| 35 | 1254.8255 | 53955 | 16.2  | 4.4   | 0.0233 |
| 36 | 1398.1644 | 57616 | 15.2  | 4.0   | 0.0243 |
| 37 | 1445.6371 | 44956 | 26.9  | 7.0   | 0.0322 |
| 38 | 1446.1093 | 55020 | 15.3  | 4.0   | 0.0263 |
| 39 | 2344.0989 | 63984 | 54.3  | 12.2  | 0.0366 |
| 40 | 2344.7355 | 56606 | 38.8  | 8.7   | 0.0414 |
| #  | m/z       | Res.  | S/N   | I %   | FWHM   |
| 1  | 349.9925  | 12733 |       | 1.7   | 0.0275 |
| 2  | 350.9959  | 12770 |       | 0.2   | 0.0275 |
| 3  | 351.9892  | 12806 |       | 18.4  | 0.0275 |
| 4  | 352.9903  | 12842 |       | 17.4  | 0.0275 |



RAJAVEL/ZHOU GUAN

---

| #  | m/z      | Res.  | S/N | I %   | FWHM   |
|----|----------|-------|-----|-------|--------|
| 5  | 353.9876 | 12878 |     | 49.6  | 0.0275 |
| 6  | 354.9899 | 12915 |     | 7.3   | 0.0275 |
| 7  | 355.9865 | 12951 |     | 100.0 | 0.0275 |
| 8  | 356.9895 | 12988 |     | 13.3  | 0.0275 |
| 9  | 357.9862 | 13024 |     | 23.1  | 0.0275 |
| 10 | 358.9890 | 13060 |     | 2.9   | 0.0275 |
| 11 | 359.9849 | 13097 |     | 1.1   | 0.0275 |



# Compound 3p

RAJAVEL/ZHOU GUAN

|             |                                                |                       |                      |
|-------------|------------------------------------------------|-----------------------|----------------------|
| Method:     | 20190603-50_3000-pos.m                         | Acquisition Date:     | 6/5/2019 12:11:45 PM |
| File Name:  | D:\Data\IAC                                    | Operator:             | Shuyang Yang / XZ    |
| Source Type | TEST\YSY\20190605\ZHOU GUAN\7_P1-B-7_01_8955.d |                       |                      |
| Focus       | ESI                                            | Ion Polarity          | Positive             |
| Scan Begin  | Active                                         | Set Capillary         | 3500 V               |
| Scan End    | 50 m/z                                         | Set End Plate Offset  | -500 V               |
|             | 3000 m/z                                       | Set Collision Cell RF | 600.0 Vpp            |
|             |                                                | Set Nebulizer         | 0.3 Bar              |
|             |                                                | Set Dry Heater        | 180 °C               |
|             |                                                | Set Dry Gas           | 4.0 l/min            |
|             |                                                | Set Divert Valve      | Source               |

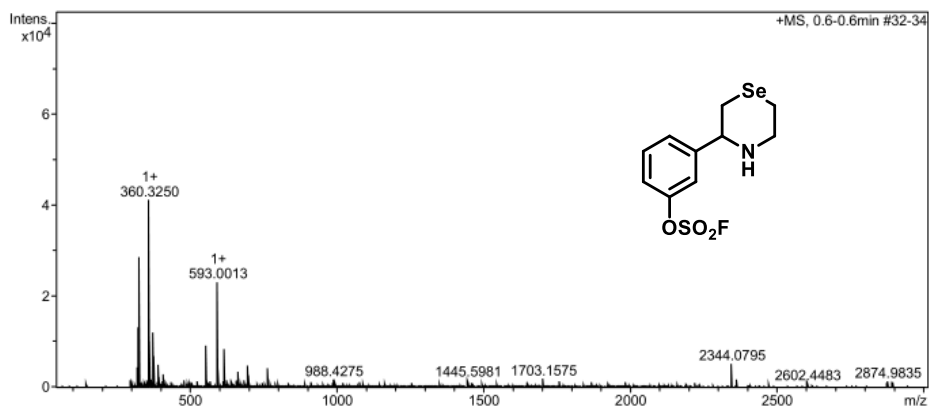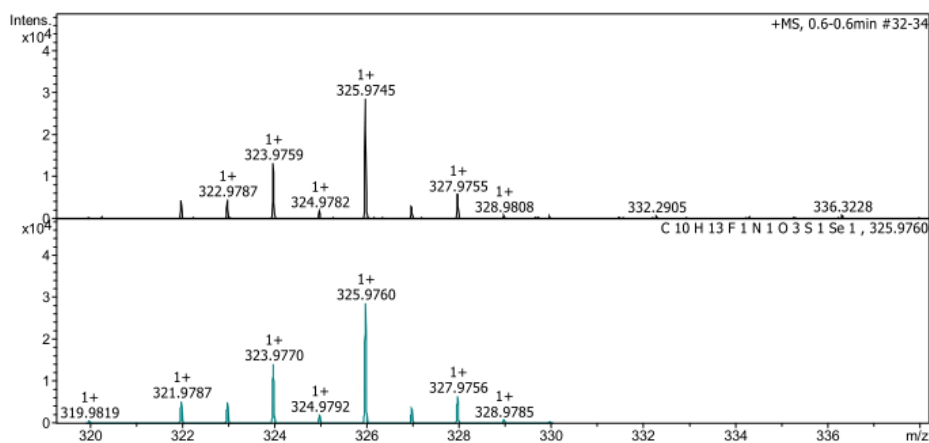



# RAJAVEL/ZHOU GUAN

## Evaluation Spectra / Validation Formula:

| Meas. m/z  | # | Ion Formula               | m/z        | Adduct | err [mDa] | err [ppm] | mSigma | N-Rule | rdb | e <sup>-</sup> Conf | Score |
|------------|---|---------------------------|------------|--------|-----------|-----------|--------|--------|-----|---------------------|-------|
| 325.974451 | 1 | C10H13FNO3S <sup>Se</sup> | 325.975959 | M+H    | 1.5       | 4.6       | 18.1   | ok     | 4.5 | even                | 79.95 |

## Calibration Info:

Date: 6/10/2019 3:53:42 PM  
Polarity: Positive  
Calibration spectrum: +MS, 4.6-4.6min #271-273: Scan  
Reference mass list: ESI: Tuning Mix ES-TOF (ESI) (pos)  
Calibration mode: Enhanced Quadratic

| Reference m/z | Resulting m/z | Intensity | Error [ppm] |
|---------------|---------------|-----------|-------------|
| 118.0863      |               |           |             |
| 322.0481      | 322.0482      | 472       | 0.127       |
| 622.0290      | 622.0286      | 14341     | -0.528      |
| 922.0098      | 922.0102      | 30926     | 0.388       |
| 1221.9906     | 1221.9911     | 45095     | 0.380       |
| 1521.9715     | 1521.9719     | 52328     | 0.295       |
| 1821.9523     | 1821.9500     | 41332     | -1.293      |
| 2121.9332     | 2121.9332     | 64024     | 0.033       |
| 2421.9140     | 2421.9166     | 19389     | 1.083       |
| 2721.8948     | 2721.8935     | 6659      | -0.485      |

Standard deviation: 0.894

## Mass List:

| #  | m/z       | Res.  | S/N   | I %   | FWHM   |
|----|-----------|-------|-------|-------|--------|
| 1  | 321.9783  | 12171 | 83.1  | 10.8  | 0.0265 |
| 2  | 322.9787  | 13314 | 85.4  | 11.1  | 0.0243 |
| 3  | 323.9759  | 12149 | 246.9 | 32.1  | 0.0267 |
| 4  | 324.9782  | 12960 | 36.9  | 4.8   | 0.0251 |
| 5  | 325.9745  | 11120 | 533.1 | 69.6  | 0.0293 |
| 6  | 326.9766  | 10735 | 55.5  | 7.3   | 0.0305 |
| 7  | 327.9755  | 10276 | 107.2 | 14.0  | 0.0319 |
| 8  | 352.3203  | 11215 | 29.1  | 3.9   | 0.0314 |
| 9  | 360.3250  | 13563 | 738.2 | 100.0 | 0.0266 |
| 10 | 361.3259  | 12476 | 183.1 | 24.8  | 0.0290 |
| 11 | 362.3282  | 9940  | 28.4  | 3.9   | 0.0365 |
| 12 | 374.3039  | 11891 | 215.4 | 29.4  | 0.0315 |
| 13 | 375.3083  | 10584 | 49.8  | 6.8   | 0.0355 |
| 14 | 376.3199  | 11491 | 121.6 | 16.6  | 0.0327 |
| 15 | 377.3186  | 11826 | 36.4  | 5.0   | 0.0319 |
| 16 | 390.2980  | 12028 | 60.3  | 8.3   | 0.0324 |
| 17 | 392.3135  | 11915 | 89.4  | 12.3  | 0.0329 |
| 18 | 393.3080  | 10561 | 40.4  | 5.5   | 0.0372 |
| 19 | 408.3094  | 12596 | 50.7  | 7.0   | 0.0324 |
| 20 | 413.2661  | 14997 | 30.1  | 4.2   | 0.0276 |
| 21 | 553.4619  | 12870 | 149.9 | 22.4  | 0.0430 |
| 22 | 554.4676  | 11783 | 53.9  | 8.1   | 0.0471 |
| 23 | 593.0013  | 13672 | 366.6 | 56.3  | 0.0434 |
| 24 | 594.0030  | 13007 | 92.9  | 14.3  | 0.0457 |
| 25 | 594.9993  | 11811 | 62.4  | 9.6   | 0.0504 |
| 26 | 614.9838  | 13228 | 133.4 | 20.6  | 0.0465 |
| 27 | 615.9822  | 11652 | 32.4  | 5.0   | 0.0529 |
| 28 | 663.3143  | 13437 | 54.7  | 8.6   | 0.0494 |
| 29 | 664.3183  | 14487 | 24.6  | 3.9   | 0.0459 |
| 30 | 685.4367  | 12774 | 24.2  | 3.9   | 0.0537 |
| 31 | 697.6616  | 12242 | 74.5  | 11.9  | 0.0570 |
| 32 | 698.6629  | 12853 | 39.9  | 6.4   | 0.0544 |
| 33 | 763.2295  | 15421 | 39.0  | 6.3   | 0.0495 |
| 34 | 763.5898  | 14353 | 37.4  | 6.1   | 0.0532 |
| 35 | 988.4275  | 15116 | 24.9  | 4.2   | 0.0654 |
| 36 | 1445.5981 | 41607 | 24.1  | 4.0   | 0.0347 |
| 37 | 1703.1575 | 60769 | 29.2  | 4.7   | 0.0280 |
| 38 | 2344.0795 | 29523 | 106.2 | 12.6  | 0.0794 |
| 39 | 2344.6598 | 24395 | 54.1  | 6.4   | 0.0961 |
| 40 | 2360.8089 | 66637 | 35.3  | 4.2   | 0.0354 |
| #  | m/z       | Res.  | S/N   | I %   | FWHM   |
| 1  | 319.9819  | 10915 |       | 1.7   | 0.0293 |
| 2  | 320.9853  | 10949 |       | 0.2   | 0.0293 |
| 3  | 321.9787  | 10983 |       | 18.5  | 0.0293 |
| 4  | 322.9797  | 11017 |       | 17.2  | 0.0293 |



RAJAVEL/ZHOU GUAN

---

| #  | m/z      | Res.  | S/N | I %   | FWHM   |
|----|----------|-------|-----|-------|--------|
| 5  | 323.9770 | 11051 |     | 49.5  | 0.0293 |
| 6  | 324.9792 | 11086 |     | 6.7   | 0.0293 |
| 7  | 325.9760 | 11120 |     | 100.0 | 0.0293 |
| 8  | 326.9789 | 11154 |     | 12.2  | 0.0293 |
| 9  | 327.9756 | 11188 |     | 22.7  | 0.0293 |
| 10 | 328.9785 | 11222 |     | 2.7   | 0.0293 |
| 11 | 329.9730 | 11256 |     | 1.0   | 0.0293 |



# Compound 3q

RAJAVEL/ZHOU GUAN

|             |                                                   |                       |                      |
|-------------|---------------------------------------------------|-----------------------|----------------------|
| Method:     | 20190603-50_3000-pos.m                            | Acquisition Date:     | 6/13/2019 6:48:29 PM |
| File Name:  | D:\Data\IAC TEST\YSY\20190613\32_P1-B-3_01_9049.d | Operator:             | Shuyang Yang / XZ    |
| Source Type | ESI                                               | Ion Polarity          | Positive             |
| Focus       | Active                                            | Set Capillary         | 3500 V               |
| Scan Begin  | 50 m/z                                            | Set End Plate Offset  | -500 V               |
| Scan End    | 3000 m/z                                          | Set Collision Cell RF | 600.0 Vpp            |
|             |                                                   | Set Nebulizer         | 0.3 Bar              |
|             |                                                   | Set Dry Heater        | 180 °C               |
|             |                                                   | Set Dry Gas           | 4.0 l/min            |
|             |                                                   | Set Divert Valve      | Source               |

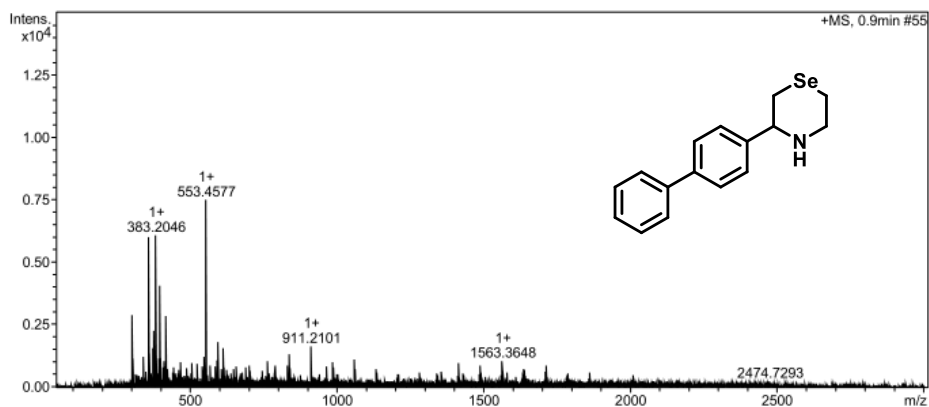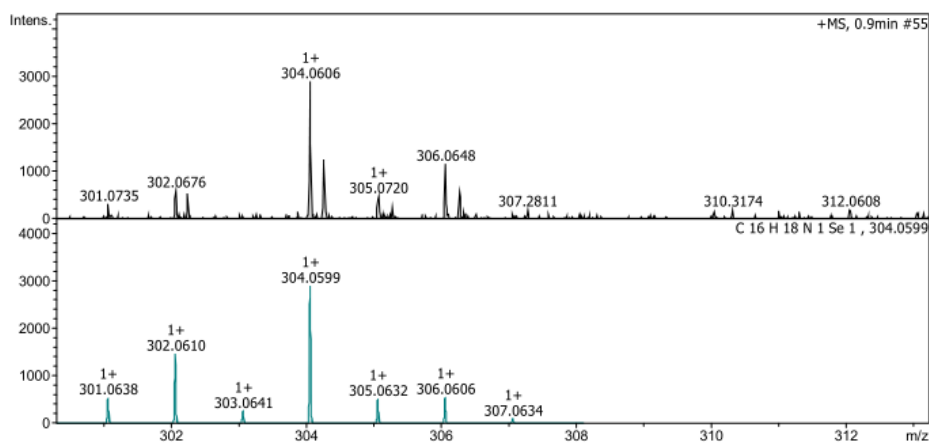



## Evaluation Spectra / Validation Formula:

| Meas. m/z  | # | Ion Formula | Score  | m/z        | err [mDa] | err [ppm] | mSigma | rdb | e <sup>-</sup> Conf | N-Rule | Adduct |
|------------|---|-------------|--------|------------|-----------|-----------|--------|-----|---------------------|--------|--------|
| 304.060565 | 1 | C16H18NSe   | 100.00 | 304.059951 | 0.6       | 2.0       | 153.7  | 8.5 | even                | ok     | M+H    |

## Calibration Info:

Date: 6/14/2019 10:15:33 AM  
Polarity: Positive  
Calibration spectrum: +MS, 4.5-4.6min #270-273: Scan  
Reference mass list: ESI: Tuning Mix ES-TOF (ESI) (pos)  
Calibration mode: Enhanced Quadratic

| Reference m/z | Resulting m/z | Intensity | Error [ppm] |
|---------------|---------------|-----------|-------------|
| 118.0863      |               |           |             |
| 322.0481      | 322.0483      | 385       | 0.532       |
| 622.0290      | 622.0282      | 13101     | -1.289      |
| 922.0098      | 922.0098      | 32963     | -0.031      |
| 1221.9906     | 1221.9908     | 43253     | 0.134       |
| 1521.9715     | 1521.9743     | 43620     | 1.823       |
| 1821.9523     | 1821.9532     | 29563     | 0.482       |
| 2121.9332     | 2121.9318     | 38084     | -0.621      |
| 2421.9140     | 2421.9062     | 9565      | -3.213      |
| 2721.8948     | 2721.9008     | 2545      | 2.183       |

Standard deviation: 2.114

## Mass List:

| #  | m/z       | Res.  | S/N  | I %   | FWHM   |
|----|-----------|-------|------|-------|--------|
| 1  | 304.0606  | 15179 | 15.8 | 38.5  | 0.0200 |
| 2  | 304.2642  | 11016 | 6.8  | 16.7  | 0.0276 |
| 3  | 306.0648  | 19379 | 6.3  | 15.4  | 0.0158 |
| 4  | 341.2619  | 15699 | 6.6  | 16.1  | 0.0217 |
| 5  | 360.3256  | 11943 | 33.1 | 80.2  | 0.0302 |
| 6  | 361.3278  | 14405 | 7.5  | 18.3  | 0.0251 |
| 7  | 374.1029  | 11771 | 5.9  | 14.4  | 0.0318 |
| 8  | 375.2521  | 23646 | 8.7  | 21.0  | 0.0159 |
| 9  | 376.1000  | 16080 | 12.4 | 30.1  | 0.0234 |
| 10 | 383.2046  | 13729 | 33.7 | 81.2  | 0.0279 |
| 11 | 384.2100  | 12623 | 7.2  | 17.4  | 0.0304 |
| 12 | 393.2975  | 12942 | 6.2  | 14.9  | 0.0304 |
| 13 | 395.0823  | 16679 | 6.5  | 15.6  | 0.0237 |
| 14 | 396.0839  | 9808  | 11.5 | 27.6  | 0.0404 |
| 15 | 398.0801  | 13909 | 22.6 | 54.4  | 0.0286 |
| 16 | 399.0847  | 23078 | 6.6  | 15.9  | 0.0173 |
| 17 | 400.0825  | 13652 | 5.8  | 14.0  | 0.0293 |
| 18 | 413.2623  | 18353 | 5.8  | 14.0  | 0.0225 |
| 19 | 418.2934  | 13823 | 15.8 | 37.9  | 0.0303 |
| 20 | 467.2843  | 9694  | 5.7  | 13.4  | 0.0482 |
| 21 | 507.2757  | 11628 | 5.7  | 13.3  | 0.0436 |
| 22 | 525.2940  | 14638 | 5.3  | 12.4  | 0.0359 |
| 23 | 548.1585  | 12984 | 7.0  | 16.2  | 0.0422 |
| 24 | 553.4577  | 12978 | 42.9 | 100.0 | 0.0426 |
| 25 | 554.4601  | 12458 | 15.6 | 36.4  | 0.0445 |
| 26 | 594.2535  | 12883 | 10.6 | 24.3  | 0.0461 |
| 27 | 614.3124  | 16742 | 9.1  | 20.8  | 0.0367 |
| 28 | 763.1720  | 9215  | 6.0  | 13.0  | 0.0828 |
| 29 | 765.1729  | 25721 | 6.4  | 14.0  | 0.0297 |
| 30 | 837.1907  | 15315 | 8.4  | 17.6  | 0.0547 |
| 31 | 839.1892  | 10052 | 6.6  | 13.9  | 0.0835 |
| 32 | 911.2101  | 9163  | 10.7 | 21.9  | 0.0994 |
| 33 | 912.2103  | 12150 | 6.3  | 12.9  | 0.0751 |
| 34 | 913.2057  | 17843 | 7.7  | 15.9  | 0.0512 |
| 35 | 985.2166  | 16560 | 6.7  | 13.4  | 0.0595 |
| 36 | 987.2251  | 13138 | 6.8  | 13.5  | 0.0751 |
| 37 | 1060.2468 | 14134 | 6.2  | 12.1  | 0.0750 |
| 38 | 1061.2527 | 10641 | 7.7  | 14.9  | 0.0997 |
| 39 | 1416.3391 | 31590 | 7.2  | 13.0  | 0.0448 |
| 40 | 1563.3648 | 18369 | 7.9  | 14.1  | 0.0851 |
| #  | m/z       | Res.  | S/N  | I %   | FWHM   |
| 1  | 298.0659  | 14879 |      | 1.8   | 0.0200 |
| 2  | 299.0692  | 14930 |      | 0.3   | 0.0200 |
| 3  | 300.0626  | 14979 |      | 18.8  | 0.0200 |
| 4  | 301.0638  | 15029 |      | 18.6  | 0.0200 |



RAJAVEL/ZHOU GUAN

---

| #  | m/z      | Res.  | S/N | I %   | FWHM   |
|----|----------|-------|-----|-------|--------|
| 5  | 302.0610 | 15079 |     | 50.6  | 0.0200 |
| 6  | 303.0641 | 15129 |     | 8.7   | 0.0200 |
| 7  | 304.0599 | 15179 |     | 100.0 | 0.0200 |
| 8  | 305.0632 | 15229 |     | 17.8  | 0.0200 |
| 9  | 306.0606 | 15279 |     | 19.0  | 0.0200 |
| 10 | 307.0634 | 15329 |     | 3.1   | 0.0200 |
| 11 | 308.0668 | 15379 |     | 0.3   | 0.0200 |



# Compound 3s

RAJAVEL/ZHOU GUAN

|             |                                                  |                       |                       |
|-------------|--------------------------------------------------|-----------------------|-----------------------|
| Method:     | 20190603-50_3000-pos.m                           | Acquisition Date:     | 6/14/2019 10:37:44 AM |
| File Name:  | D:\Data\IAC TEST\YSY\20190613\3_P1-A-3_01_9051.d | Operator:             | Shuyang Yang / XZ     |
| Source Type | ESI                                              | Ion Polarity          | Positive              |
| Focus       | Active                                           | Set Capillary         | 3500 V                |
| Scan Begin  | 50 m/z                                           | Set End Plate Offset  | -500 V                |
| Scan End    | 3000 m/z                                         | Set Collision Cell RF | 600.0 Vpp             |
|             |                                                  | Set Nebulizer         | 0.3 Bar               |
|             |                                                  | Set Dry Heater        | 180 °C                |
|             |                                                  | Set Dry Gas           | 4.0 l/min             |
|             |                                                  | Set Divert Valve      | Source                |

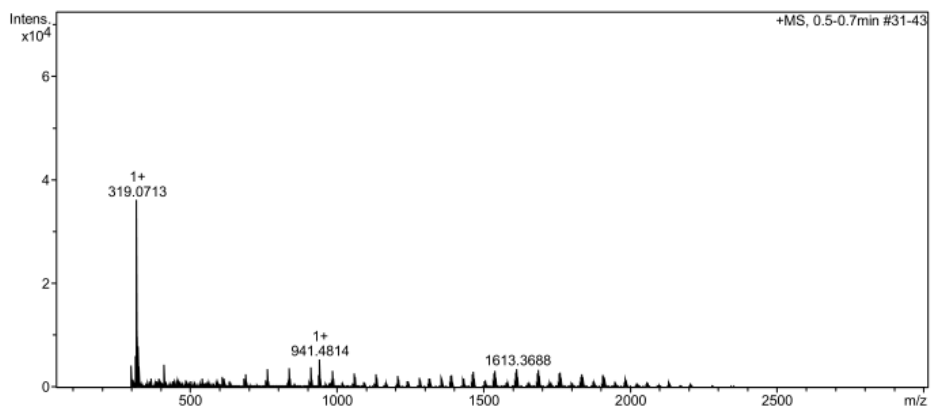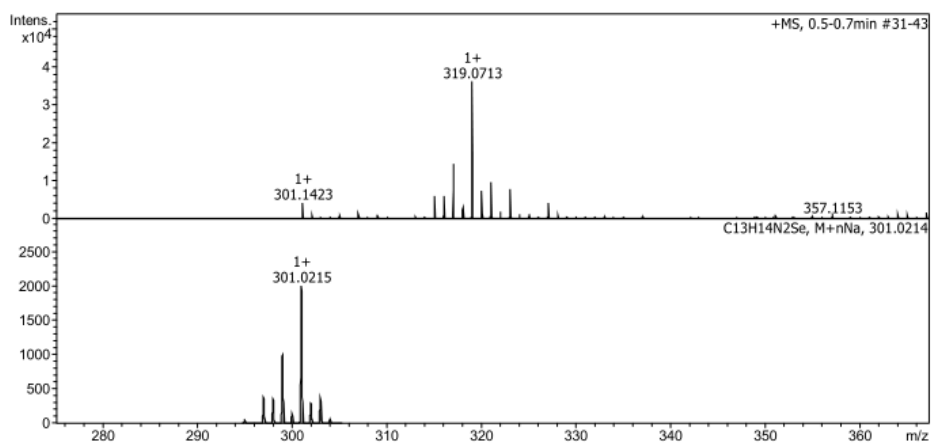



# RAJAVEL/ZHOU GUAN

## Evaluation Spectra / Validation Formula:

| Meas. m/z  | # | Ion Formula | Score  | m/z        | err [mDa] | err [ppm] | mSigma | rdb | e <sup>-</sup> Conf | N-Rule | Adduct |
|------------|---|-------------|--------|------------|-----------|-----------|--------|-----|---------------------|--------|--------|
| 319.071251 | 1 | C16H19N2Se  | 100.00 | 319.070851 | 0.4       | 1.3       | 46.4   | 8.5 | even                | ok     | M+H    |

## Calibration Info:

Date: 6/14/2019 11:37:43 AM  
Polarity: Positive  
Calibration spectrum: +MS, 4.5-4.6min #270-274: Scan  
Reference mass list: ESI: Tuning Mix ES-TOF (ESI) (pos)  
Calibration mode: Enhanced Quadratic

| Reference m/z | Resulting m/z | Intensity | Error [ppm] |
|---------------|---------------|-----------|-------------|
| 118.0863      |               |           |             |
| 322.0481      |               |           |             |
| 622.0290      | 622.0289      | 20800     | -0.107      |
| 922.0098      | 922.0102      | 45262     | 0.483       |
| 1221.9906     | 1221.9897     | 67591     | -0.779      |
| 1521.9715     | 1521.9724     | 65549     | 0.640       |
| 1821.9523     | 1821.9514     | 54911     | -0.477      |
| 2121.9332     | 2121.9340     | 52996     | 0.380       |
| 2421.9140     | 2421.9137     | 11656     | -0.140      |
| 2721.8948     |               |           |             |

Standard deviation: 0.774

## Mass List:

| #  | m/z       | Res.  | S/N    | I %   | FWHM   |
|----|-----------|-------|--------|-------|--------|
| 1  | 301.1423  | 12193 | 237.5  | 11.7  | 0.0247 |
| 2  | 315.0739  | 12546 | 313.1  | 16.4  | 0.0251 |
| 3  | 316.0729  | 12437 | 316.2  | 16.6  | 0.0254 |
| 4  | 317.0727  | 10836 | 762.5  | 40.1  | 0.0293 |
| 5  | 318.0726  | 11835 | 159.9  | 8.4   | 0.0269 |
| 6  | 319.0713  | 13034 | 1897.7 | 100.0 | 0.0245 |
| 7  | 320.0733  | 11865 | 391.1  | 20.6  | 0.0270 |
| 8  | 321.0697  | 11565 | 509.6  | 26.9  | 0.0278 |
| 9  | 323.0662  | 13352 | 408.9  | 21.7  | 0.0242 |
| 10 | 327.1242  | 11711 | 210.1  | 11.3  | 0.0279 |
| 11 | 413.2668  | 12686 | 182.9  | 12.0  | 0.0326 |
| 12 | 763.1692  | 13491 | 86.9   | 10.0  | 0.0566 |
| 13 | 765.1677  | 13749 | 68.1   | 7.9   | 0.0557 |
| 14 | 837.1905  | 12424 | 85.8   | 10.5  | 0.0674 |
| 15 | 838.1906  | 14427 | 78.4   | 9.6   | 0.0581 |
| 16 | 839.1886  | 14096 | 71.3   | 8.7   | 0.0595 |
| 17 | 911.2093  | 15510 | 83.6   | 10.8  | 0.0587 |
| 18 | 912.2093  | 14430 | 71.0   | 9.1   | 0.0632 |
| 19 | 913.2095  | 14764 | 65.4   | 8.4   | 0.0619 |
| 20 | 941.4814  | 15772 | 115.5  | 15.0  | 0.0597 |
| 21 | 942.4852  | 14451 | 62.5   | 8.1   | 0.0652 |
| 22 | 985.2268  | 12647 | 55.8   | 7.4   | 0.0779 |
| 23 | 986.2263  | 14732 | 65.5   | 8.7   | 0.0669 |
| 24 | 987.2260  | 13535 | 58.1   | 7.8   | 0.0729 |
| 25 | 1464.3319 | 14299 | 58.4   | 8.2   | 0.1024 |
| 26 | 1465.3320 | 14303 | 56.2   | 7.9   | 0.1024 |
| 27 | 1537.3531 | 13764 | 55.1   | 7.6   | 0.1117 |
| 28 | 1538.3511 | 13561 | 57.5   | 7.9   | 0.1134 |
| 29 | 1539.3490 | 14610 | 65.6   | 9.0   | 0.1054 |
| 30 | 1540.3475 | 14623 | 54.8   | 7.6   | 0.1053 |
| 31 | 1611.3696 | 14297 | 58.8   | 7.8   | 0.1127 |
| 32 | 1612.3681 | 15078 | 65.5   | 8.7   | 0.1069 |
| 33 | 1613.3688 | 14704 | 74.3   | 9.9   | 0.1097 |
| 34 | 1685.3906 | 14395 | 59.3   | 7.5   | 0.1171 |
| 35 | 1686.3840 | 14658 | 64.2   | 8.1   | 0.1150 |
| 36 | 1687.3886 | 14753 | 74.8   | 9.4   | 0.1144 |
| 37 | 1688.3860 | 14258 | 59.9   | 7.5   | 0.1184 |
| 38 | 1759.4028 | 15447 | 64.4   | 7.6   | 0.1139 |
| 39 | 1760.4062 | 13942 | 63.9   | 7.5   | 0.1263 |
| 40 | 1761.4022 | 13929 | 67.9   | 8.0   | 0.1265 |
|    |           |       |        |       |        |
| #  | m/z       | Res.  | S/N    | I %   | FWHM   |
| 1  | 295.0274  | 2314  |        | 1.8   | 0.1275 |
| 2  | 296.0308  | 2322  |        | 0.3   | 0.1275 |
| 3  | 297.0241  | 2330  |        | 18.8  | 0.1275 |
| 4  | 298.0252  | 2337  |        | 18.1  | 0.1275 |



RAJAVEL/ZHOU GUAN

---

| #  | m/z      | Res. | S/N | I %   | FWHM   |
|----|----------|------|-----|-------|--------|
| 5  | 299.0225 | 2345 |     | 50.2  | 0.1275 |
| 6  | 300.0254 | 2353 |     | 7.3   | 0.1275 |
| 7  | 301.0215 | 2361 |     | 100.0 | 0.1275 |
| 8  | 302.0245 | 2369 |     | 14.9  | 0.1275 |
| 9  | 303.0219 | 2377 |     | 18.5  | 0.1275 |
| 10 | 304.0247 | 2385 |     | 2.6   | 0.1275 |
| 11 | 305.0283 | 2392 |     | 0.2   | 0.1275 |



# Compound 3t

## Acquisition Parameter

|             |                                           |                       |                      |
|-------------|-------------------------------------------|-----------------------|----------------------|
| Method:     | MS-MS.m                                   | Acquisition Date:     | 1/4/2019 12:42:32 PM |
| File Name:  | D:\Data\YSY\20190104\Z47_P1-C-1_01_8223.d | Operator:             | Shuyang Yang / XZ    |
| Source Type | ESI                                       | Ion Polarity          | Positive             |
| Focus       | Active                                    | Set Capillary         | 3500 V               |
| Scan Begin  | 50 m/z                                    | Set End Plate Offset  | -500 V               |
| Scan End    | 2800 m/z                                  | Set Collision Cell RF | 200.0 Vpp            |
|             |                                           | Set Nebulizer         | 0.8 Bar              |
|             |                                           | Set Dry Heater        | 200 °C               |
|             |                                           | Set Dry Gas           | 4.0 l/min            |
|             |                                           | Set Divert Valve      | Source               |

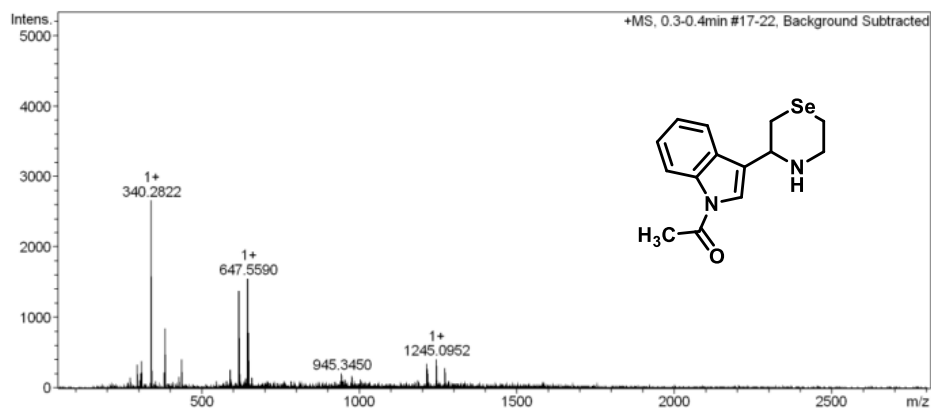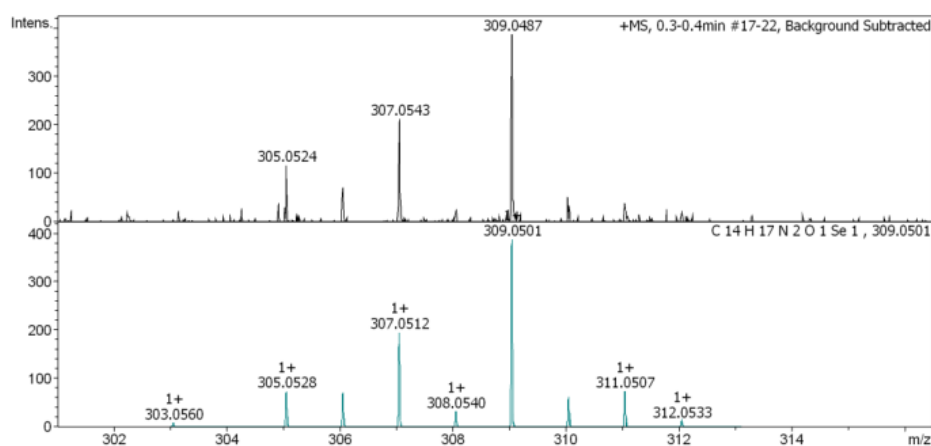



Evaluation Spectra / Validation Formula:

| Meas. m/z  | # | Ion Formula | m/z        | Adduct | err [mDa] | err [ppm] | N-Rule | mSigma | rdb | e <sup>-</sup> Conf | Score |
|------------|---|-------------|------------|--------|-----------|-----------|--------|--------|-----|---------------------|-------|
| 309.048732 | 1 | C14H17N2OSe | 309.050108 | M+H    | 1.4       | 4.5       | ok     | 621.5  | 7.5 | even                | -1.#J |

Calibration Info:

Date: 1/8/2019 5:34:27 PM  
Polarity: Positive  
Calibration spectrum: +MS, 0.2-0.2min #9-10: Scan  
Reference mass list: ESI: Tuning Mix ES-TOF\_140 (ESI) (pos)  
Calibration mode: Quadratic

| Reference m/z | Resulting m/z | Intensity | Error [ppm] |
|---------------|---------------|-----------|-------------|
| 118.0863      |               |           |             |
| 322.0481      |               |           |             |
| 622.0290      |               |           |             |
| 922.0098      | 922.0109      | 359       | 1.177       |
| 1221.9906     |               |           |             |
| 1521.9715     | 1521.9694     | 6925      | -1.391      |
| 1821.9523     |               |           |             |
| 2121.9332     | 2121.9342     | 1502      | 0.515       |
| 2421.9140     |               |           |             |
| 2721.8948     |               |           |             |
| 140.0682      | 140.0681      | 1345      | -0.441      |

Standard deviation: 2.111

Mass List:

| #  | m/z       | Res.  | S/N    | I %   | FWHM   |
|----|-----------|-------|--------|-------|--------|
| 1  | 274.2744  | 10057 | 530.6  | 5.6   | 0.0273 |
| 2  | 296.2589  | 10810 | 1059.6 | 12.5  | 0.0274 |
| 3  | 305.0524  | 21484 | 345.8  | 4.4   | 0.0142 |
| 4  | 307.0543  | 17766 | 623.2  | 8.0   | 0.0173 |
| 5  | 309.0487  | 12809 | 1112.8 | 14.5  | 0.0241 |
| 6  | 340.2822  | 14437 | 6108.1 | 100.0 | 0.0236 |
| 7  | 341.2862  | 11905 | 1006.0 | 16.6  | 0.0287 |
| 8  | 381.3004  | 10304 | 349.6  | 8.3   | 0.0370 |
| 9  | 384.3091  | 9901  | 1305.9 | 32.1  | 0.0388 |
| 10 | 385.3131  | 12907 | 274.6  | 6.8   | 0.0299 |
| 11 | 428.3395  | 10937 | 179.1  | 6.0   | 0.0392 |
| 12 | 437.1985  | 11601 | 434.4  | 15.4  | 0.0377 |
| 13 | 591.4967  | 11320 | 120.7  | 8.9   | 0.0523 |
| 14 | 619.5280  | 13164 | 620.0  | 52.1  | 0.0471 |
| 15 | 620.5277  | 14719 | 302.3  | 25.6  | 0.0422 |
| 16 | 621.5365  | 19774 | 89.9   | 7.7   | 0.0314 |
| 17 | 642.6014  | 34467 | 56.4   | 5.3   | 0.0186 |
| 18 | 647.5590  | 13616 | 611.5  | 58.4  | 0.0476 |
| 19 | 648.5634  | 16205 | 311.9  | 29.9  | 0.0400 |
| 20 | 649.5655  | 12462 | 42.3   | 4.1   | 0.0521 |
| 21 | 659.2859  | 8762  | 53.5   | 5.4   | 0.0752 |
| 22 | 660.2859  | 13205 | 40.8   | 4.1   | 0.0500 |
| 23 | 943.3510  | 19226 | 28.9   | 6.5   | 0.0491 |
| 24 | 945.3450  | 17566 | 35.1   | 8.0   | 0.0538 |
| 25 | 946.3459  | 12267 | 17.7   | 4.0   | 0.0771 |
| 26 | 956.8554  | 15626 | 19.8   | 4.6   | 0.0612 |
| 27 | 976.5818  | 23267 | 24.9   | 6.0   | 0.0420 |
| 28 | 977.8251  | 12411 | 25.9   | 6.2   | 0.0788 |
| 29 | 978.8375  | 9147  | 26.6   | 6.4   | 0.1070 |
| 30 | 1005.8585 | 8778  | 19.5   | 4.9   | 0.1146 |
| 31 | 1188.0316 | 12226 | 13.7   | 4.3   | 0.0972 |
| 32 | 1216.0560 | 15503 | 40.7   | 13.3  | 0.0784 |
| 33 | 1217.0611 | 14769 | 29.5   | 9.6   | 0.0824 |
| 34 | 1218.0696 | 15650 | 16.4   | 5.4   | 0.0778 |
| 35 | 1244.0875 | 13007 | 46.0   | 15.3  | 0.0956 |
| 36 | 1245.0952 | 16375 | 46.2   | 15.4  | 0.0760 |
| 37 | 1246.1104 | 12512 | 17.7   | 5.9   | 0.0996 |
| 38 | 1272.1204 | 16808 | 30.9   | 10.5  | 0.0757 |
| 39 | 1273.1292 | 11425 | 26.7   | 9.1   | 0.1114 |
| 40 | 1274.1270 | 11577 | 12.1   | 4.1   | 0.1101 |
| #  | m/z       | Res.  | S/N    | I %   | FWHM   |
| 1  | 303.0560  | 12560 |        | 1.8   | 0.0241 |
| 2  | 304.0594  | 12602 |        | 0.3   | 0.0241 |
| 3  | 305.0528  | 12643 |        | 18.8  | 0.0241 |
| 4  | 306.0538  | 12685 |        | 18.3  | 0.0241 |



---

| #  | m/z      | Res.  | S/N | I %   | FWHM   |
|----|----------|-------|-----|-------|--------|
| 5  | 307.0512 | 12726 |     | 50.3  | 0.0241 |
| 6  | 308.0540 | 12768 |     | 7.9   | 0.0241 |
| 7  | 309.0501 | 12809 |     | 100.0 | 0.0241 |
| 8  | 310.0532 | 12850 |     | 16.0  | 0.0241 |
| 9  | 311.0507 | 12892 |     | 18.9  | 0.0241 |
| 10 | 312.0533 | 12933 |     | 2.9   | 0.0241 |
| 11 | 313.0569 | 12975 |     | 0.2   | 0.0241 |



# Compound 3u

RAJAVEL/ZHOU GUAN

|             |                                                  |                       |                      |
|-------------|--------------------------------------------------|-----------------------|----------------------|
| Method:     | 20190603-50_3000-pos.m                           | Acquisition Date:     | 6/13/2019 6:07:25 PM |
| File Name:  | D:\Data\IAC TEST\YSY\20190613\4_P1-A-5_01_9042.d | Operator:             | Shuyang Yang / XZ    |
| Source Type | ESI                                              | Ion Polarity          | Positive             |
| Focus       | Active                                           | Set Capillary         | 3500 V               |
| Scan Begin  | 50 m/z                                           | Set End Plate Offset  | -500 V               |
| Scan End    | 3000 m/z                                         | Set Collision Cell RF | 600.0 Vpp            |
|             |                                                  | Set Nebulizer         | 0.3 Bar              |
|             |                                                  | Set Dry Heater        | 180 °C               |
|             |                                                  | Set Dry Gas           | 4.0 l/min            |
|             |                                                  | Set Divert Valve      | Source               |

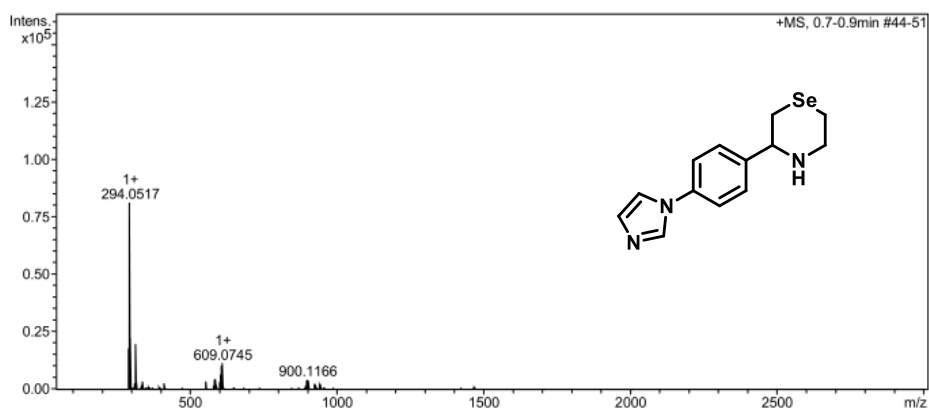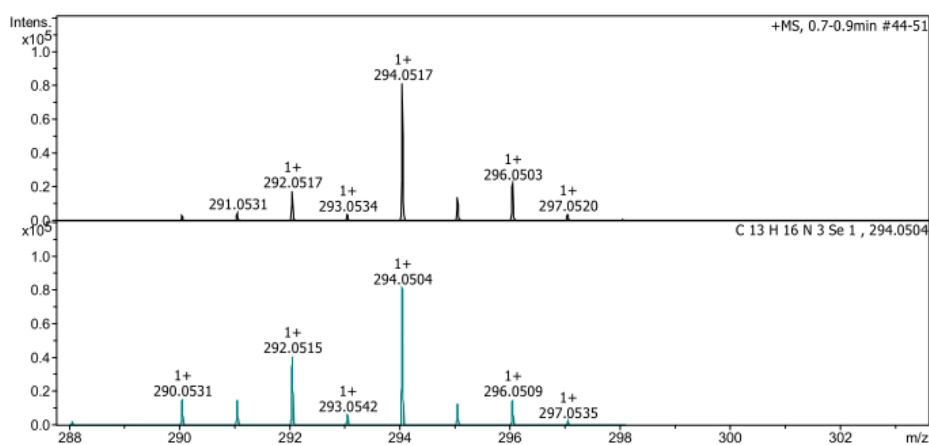



# RAJAVEL/ZHOU GUAN

## Evaluation Spectra / Validation Formula:

| Meas. m/z  | # | Ion Formula | Score  | m/z        | err [mDa] | err [ppm] | mSigma | rdb | e <sup>-</sup> Conf | N-Rule | Adduct |
|------------|---|-------------|--------|------------|-----------|-----------|--------|-----|---------------------|--------|--------|
| 294.051746 | 1 | C13H16N3Se  | 100.00 | 294.050431 | -1.3      | -4.5      | 119.4  | 7.5 | even                | ok     | M+H    |

## Calibration Info:

Date: 6/14/2019 9:33:54 AM  
Polarity: Positive  
Calibration spectrum: +MS, 4.6-4.7min #271-280: Scan  
Reference mass list: ESI: Tuning Mix ES-TOF (ESI) (pos)  
Calibration mode: Enhanced Quadratic

| Reference m/z | Resulting m/z | Intensity | Error [ppm] |
|---------------|---------------|-----------|-------------|
| 118.0863      |               |           |             |
| 322.0481      |               |           |             |
| 622.0290      | 622.0290      | 17290     | -0.004      |
| 922.0098      | 922.0099      | 39160     | 0.079       |
| 1221.9906     | 1221.9902     | 55282     | -0.325      |
| 1521.9715     | 1521.9723     | 53747     | 0.537       |
| 1821.9523     | 1821.9516     | 41836     | -0.396      |
| 2121.9332     | 2121.9334     | 42291     | 0.107       |
| 2421.9140     | 2421.9140     | 9533      | 0.001       |
| 2721.8948     |               |           |             |

Standard deviation: 0.454

## Mass List:

| #  | m/z      | Res.  | S/N    | I %   | FWHM   |
|----|----------|-------|--------|-------|--------|
| 1  | 290.0521 | 11681 | 134.3  | 3.7   | 0.0248 |
| 2  | 291.0531 | 12631 | 219.1  | 6.0   | 0.0230 |
| 3  | 292.0517 | 11869 | 792.0  | 21.7  | 0.0246 |
| 4  | 293.0534 | 11244 | 164.8  | 4.5   | 0.0261 |
| 5  | 294.0517 | 14067 | 3646.6 | 100.0 | 0.0209 |
| 6  | 295.0528 | 11058 | 617.2  | 16.9  | 0.0267 |
| 7  | 296.0503 | 11672 | 996.7  | 27.3  | 0.0254 |
| 8  | 297.0520 | 10018 | 168.6  | 4.6   | 0.0297 |
| 9  | 312.0335 | 10767 | 84.3   | 2.3   | 0.0290 |
| 10 | 313.0352 | 12122 | 115.9  | 3.2   | 0.0258 |
| 11 | 314.0321 | 10812 | 296.7  | 8.2   | 0.0290 |
| 12 | 316.0320 | 13530 | 881.9  | 24.4  | 0.0234 |
| 13 | 317.0334 | 11445 | 125.8  | 3.5   | 0.0277 |
| 14 | 318.0318 | 11764 | 159.6  | 4.4   | 0.0270 |
| 15 | 336.0774 | 11811 | 94.5   | 2.6   | 0.0285 |
| 16 | 338.0752 | 11688 | 152.9  | 4.2   | 0.0289 |
| 17 | 413.2656 | 13389 | 113.7  | 3.2   | 0.0309 |
| 18 | 553.4580 | 12692 | 148.7  | 4.5   | 0.0436 |
| 19 | 583.0938 | 12989 | 93.7   | 2.9   | 0.0449 |
| 20 | 585.0923 | 13579 | 170.6  | 5.3   | 0.0431 |
| 21 | 587.0927 | 13314 | 176.9  | 5.5   | 0.0441 |
| 22 | 589.0956 | 14612 | 81.0   | 2.5   | 0.0403 |
| 23 | 603.0782 | 13594 | 100.2  | 3.1   | 0.0444 |
| 24 | 604.0780 | 12745 | 74.3   | 2.3   | 0.0474 |
| 25 | 605.0764 | 14367 | 249.4  | 7.8   | 0.0421 |
| 26 | 606.0775 | 13129 | 179.1  | 5.6   | 0.0462 |
| 27 | 607.0753 | 13379 | 402.7  | 12.6  | 0.0454 |
| 28 | 608.0768 | 12030 | 127.2  | 4.0   | 0.0505 |
| 29 | 609.0745 | 14069 | 444.4  | 13.9  | 0.0433 |
| 30 | 610.0762 | 11866 | 116.2  | 3.6   | 0.0514 |
| 31 | 611.0733 | 12583 | 142.3  | 4.5   | 0.0486 |
| 32 | 896.1186 | 13386 | 69.3   | 2.5   | 0.0669 |
| 33 | 897.1178 | 14884 | 68.9   | 2.5   | 0.0603 |
| 34 | 898.1174 | 14121 | 133.0  | 4.8   | 0.0636 |
| 35 | 899.1185 | 12939 | 84.0   | 3.0   | 0.0695 |
| 36 | 900.1166 | 12746 | 149.5  | 5.4   | 0.0706 |
| 37 | 901.1174 | 12210 | 72.9   | 2.6   | 0.0738 |
| 38 | 902.1146 | 13769 | 138.2  | 5.0   | 0.0655 |
| 39 | 926.3218 | 14107 | 82.9   | 3.0   | 0.0657 |
| 40 | 944.3801 | 13139 | 86.3   | 3.1   | 0.0719 |
| #  | m/z      | Res.  | S/N    | I %   | FWHM   |
| 1  | 288.0564 | 13780 |        | 1.8   | 0.0209 |
| 2  | 289.0597 | 13828 |        | 0.3   | 0.0209 |
| 3  | 290.0531 | 13875 |        | 18.8  | 0.0209 |
| 4  | 291.0541 | 13923 |        | 18.2  | 0.0209 |



RAJAVEL/ZHOU GUAN

---

| #  | m/z      | Res.  | S/N | I %   | FWHM   |
|----|----------|-------|-----|-------|--------|
| 5  | 292.0515 | 13971 |     | 50.2  | 0.0209 |
| 6  | 293.0542 | 14019 |     | 7.5   | 0.0209 |
| 7  | 294.0504 | 14067 |     | 100.0 | 0.0209 |
| 8  | 295.0533 | 14115 |     | 15.3  | 0.0209 |
| 9  | 296.0509 | 14162 |     | 18.6  | 0.0209 |
| 10 | 297.0535 | 14210 |     | 2.7   | 0.0209 |
| 11 | 298.0573 | 14258 |     | 0.2   | 0.0209 |



## Compound 3w

DILUTE IN 50 TIMES

### Acquisition Parameter

|             |                                                   |                       |                      |
|-------------|---------------------------------------------------|-----------------------|----------------------|
| Method:     | 20181224-tune-wide-pos.m                          | Acquisition Date:     | 1/11/2019 2:26:24 PM |
| File Name:  | D:\Data\IAC TEST\YSY\20190111\45_P1-A-3_01_8268.d | Operator:             | Shuyang Yang / XZ    |
| Source Type | ESI                                               | Ion Polarity          | Positive             |
| Focus       | Active                                            | Set Capillary         | 3500 V               |
| Scan Begin  | 50 m/z                                            | Set End Plate Offset  | -500 V               |
| Scan End    | 2800 m/z                                          | Set Collision Cell RF | 200.0 Vpp            |
|             |                                                   | Set Nebulizer         | 0.4 Bar              |
|             |                                                   | Set Dry Heater        | 200 °C               |
|             |                                                   | Set Dry Gas           | 2.0 l/min            |
|             |                                                   | Set Divert Valve      | Source               |

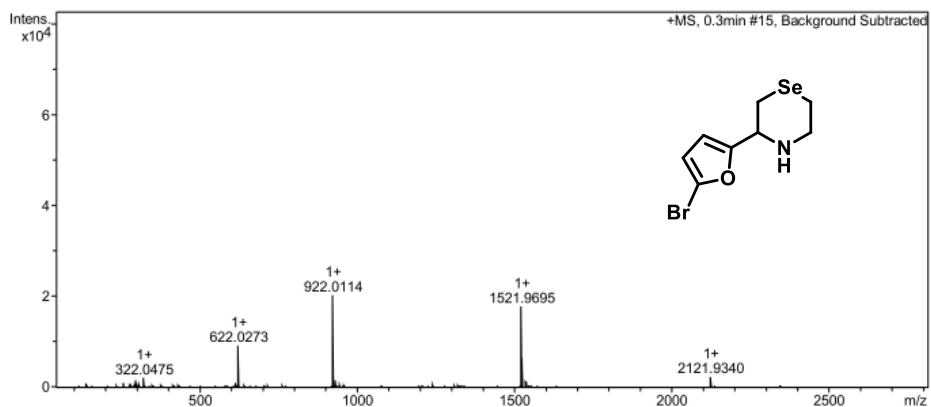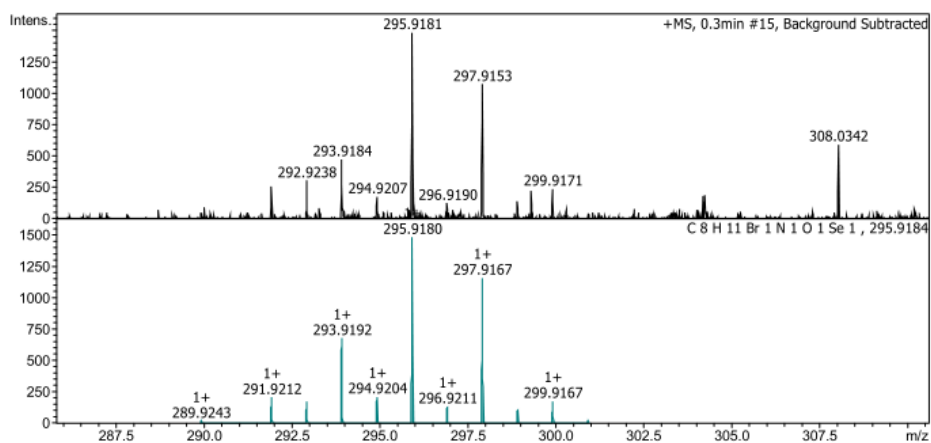



## DILUTE IN 50 TIMES

## Evaluation Spectra / Validation Formula:

| Meas. m/z  | # | Ion Formula | m/z        | Adduct | err [mDa] | err [ppm] | mSigma | N-Rule | rdb | e <sup>-</sup> Conf | Score  |
|------------|---|-------------|------------|--------|-----------|-----------|--------|--------|-----|---------------------|--------|
| 295.918131 | 1 | C8H11BrNOSe | 295.918037 | M+H    | 0.1       | 0.3       | 55.5   | ok     | 3.5 | even                | 100.00 |

## Calibration Info:

Date: 1/11/2019 2:36:05 PM  
Polarity: Positive  
Calibration spectrum: +MS, 0.3min #15: Scan  
Reference mass list: ESI: Tuning Mix ES-TOF\_140 (ESI) (pos)  
Calibration mode: Enhanced Quadratic

| Reference m/z | Resulting m/z | Intensity | Error [ppm] |
|---------------|---------------|-----------|-------------|
| 118.0863      | 118.0864      | 372       | 1.012       |
| 322.0481      | 322.0482      | 6461      | 0.194       |
| 622.0290      | 622.0283      | 19402     | -1.010      |
| 922.0098      | 922.0113      | 41206     | 1.666       |
| 1221.9906     |               |           |             |
| 1521.9715     | 1521.9699     | 33286     | -1.066      |
| 1821.9523     |               |           |             |
| 2121.9332     | 2121.9338     | 4772      | 0.325       |
| 2421.9140     |               |           |             |
| 2721.8948     |               |           |             |
| 140.0682      | 140.0680      | 628       | -1.121      |

Standard deviation: 1.632

## Mass List:

| #  | m/z       | Res.  | S/N   | I %   | FWHM   |
|----|-----------|-------|-------|-------|--------|
| 1  | 140.0680  | 9505  | 22.0  | 2.0   | 0.0147 |
| 2  | 257.1478  | 15494 | 47.6  | 5.1   | 0.0166 |
| 3  | 282.2762  | 15457 | 22.7  | 2.5   | 0.0183 |
| 4  | 293.9184  | 13239 | 21.1  | 2.3   | 0.0222 |
| 5  | 295.9181  | 15347 | 65.9  | 7.3   | 0.0193 |
| 6  | 297.9153  | 11493 | 47.6  | 5.3   | 0.0259 |
| 7  | 308.0342  | 20990 | 26.2  | 2.9   | 0.0147 |
| 8  | 322.0475  | 11478 | 92.7  | 10.3  | 0.0281 |
| 9  | 376.3414  | 10969 | 20.5  | 2.4   | 0.0343 |
| 10 | 415.2116  | 10914 | 19.7  | 2.3   | 0.0380 |
| 11 | 614.5693  | 17619 | 41.2  | 5.1   | 0.0349 |
| 12 | 622.0273  | 13366 | 366.4 | 45.5  | 0.0465 |
| 13 | 623.0299  | 9716  | 51.6  | 6.4   | 0.0641 |
| 14 | 642.6040  | 11315 | 18.3  | 2.3   | 0.0568 |
| 15 | 763.4701  | 41302 | 17.1  | 2.2   | 0.0185 |
| 16 | 922.0114  | 14509 | 763.1 | 100.0 | 0.0635 |
| 17 | 923.0108  | 14110 | 193.1 | 25.3  | 0.0654 |
| 18 | 924.0097  | 12730 | 24.9  | 3.3   | 0.0726 |
| 19 | 931.6677  | 34656 | 51.7  | 6.8   | 0.0269 |
| 20 | 931.7858  | 8051  | 23.1  | 3.0   | 0.1157 |
| 21 | 943.6765  | 15811 | 20.0  | 2.6   | 0.0597 |
| 22 | 943.8210  | 40079 | 17.9  | 2.3   | 0.0235 |
| 23 | 944.2389  | 47405 | 17.1  | 2.2   | 0.0199 |
| 24 | 958.3682  | 16122 | 16.4  | 2.2   | 0.0594 |
| 25 | 1239.6254 | 54590 | 21.0  | 2.7   | 0.0227 |
| 26 | 1307.9609 | 9628  | 17.4  | 2.2   | 0.1359 |
| 27 | 1521.9695 | 17060 | 712.8 | 87.6  | 0.0892 |
| 28 | 1522.9714 | 17036 | 261.1 | 32.1  | 0.0894 |
| 29 | 1523.9650 | 13968 | 59.1  | 7.3   | 0.1091 |
| 30 | 1534.5985 | 61742 | 28.8  | 3.5   | 0.0249 |
| 31 | 1535.1207 | 49715 | 18.2  | 2.2   | 0.0309 |
| 32 | 1535.6482 | 20819 | 26.8  | 3.3   | 0.0738 |
| 33 | 1535.8728 | 58045 | 23.3  | 2.9   | 0.0265 |
| 34 | 1536.1583 | 15478 | 31.2  | 3.8   | 0.0992 |
| 35 | 1536.5882 | 54403 | 23.3  | 2.9   | 0.0282 |
| 36 | 1536.8441 | 36117 | 28.3  | 3.5   | 0.0426 |
| 37 | 1537.0675 | 51269 | 43.2  | 5.3   | 0.0300 |
| 38 | 1537.2739 | 56178 | 56.5  | 6.9   | 0.0274 |
| 39 | 2121.9340 | 12123 | 134.3 | 11.8  | 0.1750 |
| 40 | 2122.9320 | 21397 | 85.0  | 7.5   | 0.0992 |

| # | m/z      | Res.  | S/N | I %  | FWHM   |
|---|----------|-------|-----|------|--------|
| 1 | 289.9243 | 15036 |     | 1.2  | 0.0193 |
| 2 | 290.9277 | 15088 |     | 0.1  | 0.0193 |
| 3 | 291.9212 | 15139 |     | 13.9 | 0.0193 |
| 4 | 292.9221 | 15191 |     | 11.6 | 0.0193 |



**DILUTE IN 50 TIMES**

---

| #  | m/z      | Res.  | S/N | I %   | FWHM   |
|----|----------|-------|-----|-------|--------|
| 5  | 293.9192 | 15243 |     | 45.7  | 0.0193 |
| 6  | 294.9204 | 15295 |     | 14.2  | 0.0193 |
| 7  | 295.9180 | 15347 |     | 100.0 | 0.0193 |
| 8  | 296.9211 | 15399 |     | 9.1   | 0.0193 |
| 9  | 297.9167 | 15450 |     | 78.0  | 0.0193 |
| 10 | 298.9198 | 15502 |     | 7.1   | 0.0193 |
| 11 | 299.9167 | 15554 |     | 12.0  | 0.0193 |
| 12 | 300.9199 | 15606 |     | 1.1   | 0.0193 |



## Compound 3y

### Acquisition Parameter

|             |                                           |                       |                      |
|-------------|-------------------------------------------|-----------------------|----------------------|
| Method:     | MS-MS.m                                   | Acquisition Date:     | 1/4/2019 12:19:06 PM |
| File Name:  | D:\Data\YSY\20190104\Z43_P1-B-6_01_8219.d | Operator:             | Shuyang Yang / XZ    |
| Source Type | ESI                                       | Ion Polarity          | Positive             |
| Focus       | Active                                    | Set Capillary         | 3500 V               |
| Scan Begin  | 50 m/z                                    | Set End Plate Offset  | -500 V               |
| Scan End    | 2800 m/z                                  | Set Collision Cell RF | 200.0 Vpp            |
|             |                                           | Set Nebulizer         | 0.8 Bar              |
|             |                                           | Set Dry Heater        | 200 °C               |
|             |                                           | Set Dry Gas           | 4.0 l/min            |
|             |                                           | Set Divert Valve      | Source               |

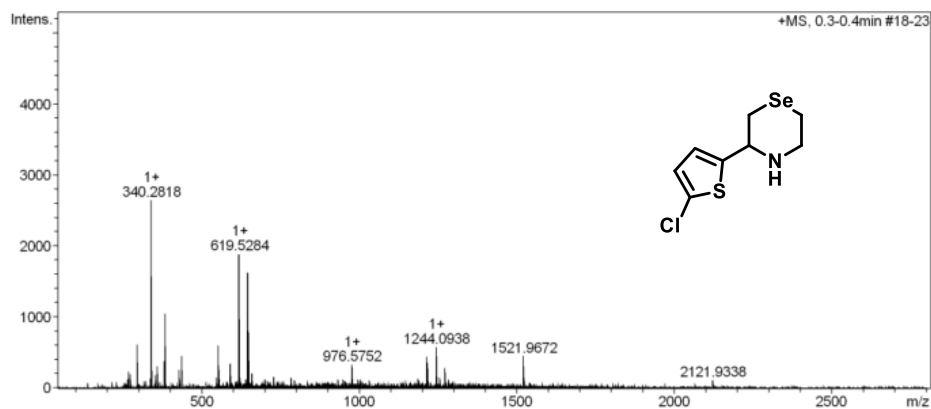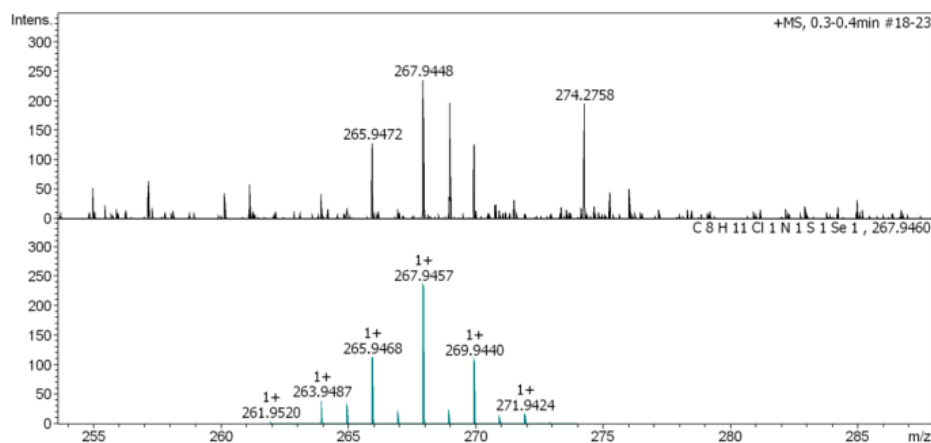



Evaluation Spectra / Validation Formula:

| Meas. m/z  | # | Ion Formula | m/z        | Adduct | err [mDa] | err [ppm] | mSigma | N-Rule | rdb | e <sup>-</sup> Conf | Score  |
|------------|---|-------------|------------|--------|-----------|-----------|--------|--------|-----|---------------------|--------|
| 265.947191 | 1 | C8H11CINSSe | 267.945722 | M+H    | 0.3       | 1.3       | 235.3  | ok     | 3.5 | even                | 100.00 |

Calibration Info:

Date: 1/4/2019 4:41:48 PM  
Polarity: Positive  
Calibration spectrum: +MS, 0.2-0.2min #11-14; Scan  
Reference mass list: ESI: Tuning Mix ES-TOF\_140 (ESI) (pos)  
Calibration mode: Quadratic

| Reference m/z | Resulting m/z | Intensity | Error [ppm] |
|---------------|---------------|-----------|-------------|
| 118.0863      |               |           |             |
| 322.0481      |               |           |             |
| 622.0290      |               |           |             |
| 922.0098      | 922.0104      | 407       | 0.659       |
| 1221.9906     |               |           |             |
| 1521.9715     | 1521.9703     | 7066      | -0.778      |
| 1821.9523     |               |           |             |
| 2121.9332     | 2121.9338     | 1447      | 0.288       |
| 2421.9140     |               |           |             |
| 2721.8948     |               |           |             |
| 140.0682      | 140.0682      | 1421      | -0.247      |

Standard deviation: 1.181

Mass List:

| #  | m/z       | Res.  | S/N    | I %   | FWHM   |
|----|-----------|-------|--------|-------|--------|
| 1  | 267.9448  | 12884 | 170.4  | 8.9   | 0.0208 |
| 2  | 268.9979  | 14672 | 141.8  | 7.5   | 0.0183 |
| 3  | 274.2758  | 10312 | 138.6  | 7.4   | 0.0266 |
| 4  | 296.2567  | 11342 | 409.7  | 23.2  | 0.0261 |
| 5  | 340.2818  | 11299 | 1518.4 | 100.0 | 0.0301 |
| 6  | 341.2857  | 15642 | 370.1  | 24.5  | 0.0218 |
| 7  | 353.2660  | 17168 | 99.1   | 6.9   | 0.0206 |
| 8  | 360.3239  | 12310 | 163.2  | 11.7  | 0.0293 |
| 9  | 381.2997  | 15813 | 182.2  | 14.4  | 0.0241 |
| 10 | 384.3083  | 11254 | 499.4  | 40.1  | 0.0342 |
| 11 | 385.3123  | 10591 | 117.3  | 9.5   | 0.0364 |
| 12 | 428.3334  | 11957 | 107.9  | 10.0  | 0.0358 |
| 13 | 437.1922  | 16808 | 178.7  | 17.1  | 0.0260 |
| 14 | 548.5018  | 14427 | 46.4   | 5.7   | 0.0380 |
| 15 | 553.4573  | 13001 | 184.6  | 23.0  | 0.0426 |
| 16 | 554.4633  | 14442 | 80.4   | 10.0  | 0.0384 |
| 17 | 591.4967  | 12515 | 96.2   | 13.2  | 0.0473 |
| 18 | 619.5284  | 13459 | 491.4  | 71.5  | 0.0460 |
| 19 | 620.5299  | 12758 | 203.2  | 29.7  | 0.0486 |
| 20 | 621.5319  | 14468 | 38.6   | 5.7   | 0.0430 |
| 21 | 647.5608  | 11825 | 396.9  | 61.5  | 0.0548 |
| 22 | 648.5610  | 13803 | 190.5  | 29.6  | 0.0470 |
| 23 | 649.5602  | 10156 | 42.5   | 6.6   | 0.0640 |
| 24 | 659.2851  | 8039  | 49.2   | 7.8   | 0.0820 |
| 25 | 729.5614  | 17465 | 33.5   | 6.1   | 0.0418 |
| 26 | 783.5303  | 12560 | 28.3   | 5.6   | 0.0624 |
| 27 | 976.5752  | 19150 | 47.7   | 12.6  | 0.0510 |
| 28 | 977.8374  | 11092 | 29.6   | 7.8   | 0.0882 |
| 29 | 978.8431  | 23272 | 28.7   | 7.6   | 0.0421 |
| 30 | 1216.0627 | 13227 | 52.2   | 17.0  | 0.0919 |
| 31 | 1217.0573 | 13370 | 41.4   | 13.5  | 0.0910 |
| 32 | 1218.0692 | 13019 | 16.8   | 5.5   | 0.0936 |
| 33 | 1244.0938 | 14763 | 66.8   | 22.1  | 0.0843 |
| 34 | 1245.0957 | 15111 | 58.9   | 19.5  | 0.0824 |
| 35 | 1246.0989 | 12492 | 19.5   | 6.5   | 0.0997 |
| 36 | 1255.8210 | 13105 | 17.7   | 5.9   | 0.0958 |
| 37 | 1272.1193 | 13867 | 32.4   | 10.9  | 0.0917 |
| 38 | 1273.1249 | 12912 | 28.8   | 9.7   | 0.0986 |
| 39 | 1521.9672 | 12393 | 49.2   | 17.1  | 0.1228 |
| 40 | 1522.9744 | 11803 | 15.8   | 5.5   | 0.1290 |
| #  | m/z       | Res.  | S/N    | I %   | FWHM   |
| 1  | 261.9520  | 12596 |        | 1.5   | 0.0208 |
| 2  | 262.9554  | 12644 |        | 0.2   | 0.0208 |
| 3  | 263.9487  | 12692 |        | 16.5  | 0.0208 |
| 4  | 264.9497  | 12740 |        | 14.6  | 0.0208 |



---

| #  | m/z      | Res.  | S/N | I %   | FWHM   |
|----|----------|-------|-----|-------|--------|
| 5  | 265.9468 | 12788 |     | 47.6  | 0.0208 |
| 6  | 266.9479 | 12836 |     | 9.4   | 0.0208 |
| 7  | 267.9457 | 12884 |     | 100.0 | 0.0208 |
| 8  | 268.9485 | 12932 |     | 10.1  | 0.0208 |
| 9  | 269.9440 | 12980 |     | 46.6  | 0.0208 |
| 10 | 270.9469 | 13028 |     | 4.6   | 0.0208 |
| 11 | 271.9424 | 13076 |     | 6.8   | 0.0208 |
| 12 | 272.9457 | 13124 |     | 0.6   | 0.0208 |
| 13 | 273.9391 | 13172 |     | 0.2   | 0.0208 |



# Compound 3z

## RAJAVEL GROUP

### Analysis Info

|               |                                                                     |                      |                       |
|---------------|---------------------------------------------------------------------|----------------------|-----------------------|
| Analysis Name | D:\Data\IAC TEST\DATA\QTOF-2013-20200519\ZG-533-4_P1-B-3_01_10137.d | Acquisition Date     | 5/19/2020 10:37:23 AM |
| Method        | 20191029ms-50_3000-pos.m                                            | Operator             | Shuyang Yang / XZ     |
| Sample Name   | ZG-533-4                                                            | Instrument           | microtof Q II         |
|               | RAJAVEL GROUP                                                       |                      | 228888.10387          |
| Focus         | ESI                                                                 | Ion Polarity         | Positive              |
| Source Type   | Active                                                              | Set Capillary        | 3500 V                |
| Scan End      | 50 m/z                                                              | Set End Plate Offset | -500 V                |
|               |                                                                     | Set Nebulizer        | 0.8 Bar               |
|               |                                                                     | Set Dry Heater       | 180 °C                |
|               |                                                                     | Set Dry Gas          | 4.0 l/min             |

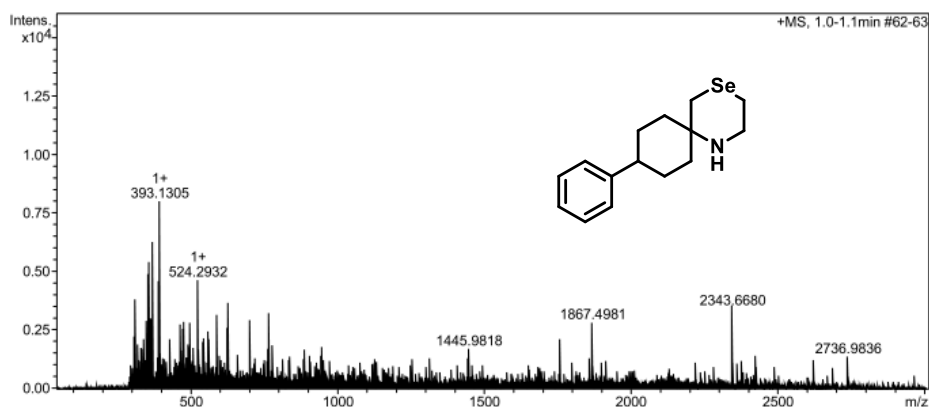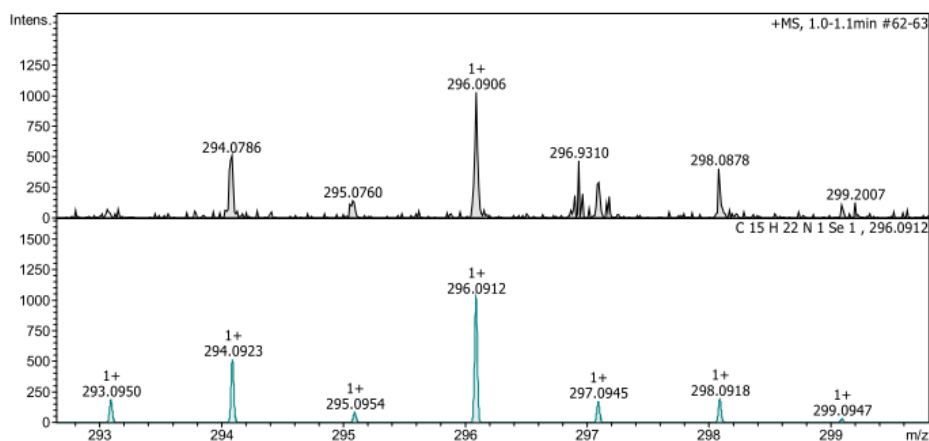



# RAJAVEL GROUP

## Evaluation Spectra / Validation Formula:

| Meas. m/z  | # | Ion Formula | Score  | m/z        | err [mDa] | err [ppm] | mSigma | rdB | e <sup>-</sup> Conf | N-Rule | Adduct |
|------------|---|-------------|--------|------------|-----------|-----------|--------|-----|---------------------|--------|--------|
| 296.090618 | 1 | C15H22NSe   | 100.00 | 296.091245 | -0.6      | -2.1      | 122.4  | 5.5 | even                | ok     | M+H    |

## Calibration Info:

Date: 5/19/2020 11:27:56 AM  
Polarity: Positive  
Calibration spectrum: +MS, 4.6-4.7min #271-278: Scan  
Reference mass list: ESI: Tuning Mix ES-TOF (ESI) (pos)  
Calibration mode: Enhanced Quadratic

| Reference m/z | Resulting m/z | Intensity | Error [ppm] |
|---------------|---------------|-----------|-------------|
| 118.0863      |               |           |             |
| 322.0481      | 322.0481      | 7432      | -0.127      |
| 622.0290      | 622.0293      | 38606     | 0.618       |
| 922.0098      | 922.0090      | 47791     | -0.816      |
| 1221.9906     | 1221.9905     | 44169     | -0.087      |
| 1521.9715     | 1521.9728     | 39388     | 0.855       |
| 1821.9523     | 1821.9514     | 22773     | -0.512      |
| 2121.9332     | 2121.9333     | 13635     | 0.069       |
| 2421.9140     |               |           |             |
| 2721.8948     |               |           |             |

Standard deviation: 0.866

## Mass List:

| #  | m/z       | Res.  | S/N  | I %   | FWHM   |
|----|-----------|-------|------|-------|--------|
| 1  | 310.0896  | 7033  | 24.3 | 27.9  | 0.0441 |
| 2  | 312.0839  | 9600  | 41.5 | 47.9  | 0.0325 |
| 3  | 319.0692  | 9955  | 20.1 | 23.5  | 0.0321 |
| 4  | 340.2631  | 10013 | 21.9 | 26.5  | 0.0340 |
| 5  | 349.0987  | 8288  | 21.6 | 26.4  | 0.0421 |
| 6  | 351.0998  | 7425  | 29.7 | 36.3  | 0.0473 |
| 7  | 352.1112  | 7004  | 19.0 | 23.2  | 0.0503 |
| 8  | 354.9944  | 10123 | 24.5 | 30.0  | 0.0351 |
| 9  | 356.9948  | 11411 | 49.7 | 61.2  | 0.0313 |
| 10 | 358.9906  | 11034 | 55.0 | 67.8  | 0.0325 |
| 11 | 365.0950  | 9075  | 30.2 | 37.4  | 0.0402 |
| 12 | 368.1469  | 9797  | 30.1 | 37.3  | 0.0376 |
| 13 | 370.1458  | 10736 | 63.1 | 78.3  | 0.0345 |
| 14 | 390.1279  | 12284 | 23.1 | 29.1  | 0.0318 |
| 15 | 391.1244  | 11226 | 45.8 | 57.5  | 0.0348 |
| 16 | 393.1305  | 9618  | 79.5 | 100.0 | 0.0409 |
| 17 | 394.1281  | 10493 | 33.9 | 42.6  | 0.0376 |
| 18 | 395.1254  | 11500 | 25.5 | 32.1  | 0.0344 |
| 19 | 430.9128  | 13131 | 20.7 | 26.3  | 0.0328 |
| 20 | 465.1797  | 12682 | 25.7 | 34.2  | 0.0367 |
| 21 | 475.3232  | 12629 | 24.0 | 32.3  | 0.0376 |
| 22 | 477.1749  | 11441 | 26.6 | 35.9  | 0.0417 |
| 23 | 491.1875  | 12922 | 17.2 | 23.6  | 0.0380 |
| 24 | 497.0431  | 11360 | 21.0 | 29.0  | 0.0438 |
| 25 | 497.1004  | 24162 | 25.4 | 35.2  | 0.0206 |
| 26 | 524.2932  | 12191 | 40.4 | 57.9  | 0.0430 |
| 27 | 525.2904  | 5363  | 16.1 | 23.1  | 0.0980 |
| 28 | 543.0971  | 10971 | 17.1 | 25.0  | 0.0495 |
| 29 | 545.0969  | 10659 | 18.3 | 26.7  | 0.0511 |
| 30 | 561.2135  | 10756 | 20.6 | 30.6  | 0.0522 |
| 31 | 563.2265  | 10660 | 17.9 | 26.6  | 0.0528 |
| 32 | 588.4055  | 10905 | 26.2 | 39.6  | 0.0540 |
| 33 | 626.6175  | 31364 | 29.5 | 46.1  | 0.0200 |
| 34 | 626.6590  | 37385 | 18.4 | 28.8  | 0.0168 |
| 35 | 701.4978  | 9265  | 22.7 | 36.9  | 0.0757 |
| 36 | 765.9481  | 14873 | 14.2 | 23.3  | 0.0515 |
| 37 | 766.0846  | 33596 | 24.7 | 40.5  | 0.0228 |
| 38 | 1756.8905 | 60034 | 22.8 | 26.3  | 0.0293 |
| 39 | 1867.4981 | 52221 | 32.4 | 35.3  | 0.0358 |
| 40 | 2343.6680 | 59014 | 49.7 | 42.7  | 0.0397 |
| #  | m/z       | Res.  | S/N  | I %   | FWHM   |
| 1  | 290.0972  | 11470 |      | 1.8   | 0.0253 |
| 2  | 291.1005  | 11510 |      | 0.3   | 0.0253 |
| 3  | 292.0939  | 11549 |      | 18.8  | 0.0253 |
| 4  | 293.0950  | 11589 |      | 18.4  | 0.0253 |



**RAJAVEL GROUP**

---

| #  | m/z      | Res.  | S/N | I %   | FWHM   |
|----|----------|-------|-----|-------|--------|
| 5  | 294.0923 | 11628 |     | 50.4  | 0.0253 |
| 6  | 295.0954 | 11668 |     | 8.2   | 0.0253 |
| 7  | 296.0912 | 11707 |     | 100.0 | 0.0253 |
| 8  | 297.0945 | 11747 |     | 16.7  | 0.0253 |
| 9  | 298.0918 | 11786 |     | 18.8  | 0.0253 |
| 10 | 299.0947 | 11826 |     | 3.0   | 0.0253 |
| 11 | 300.0981 | 11866 |     | 0.2   | 0.0253 |



## Compound 4a

D:\IAC2020\...\20200817ZG\QEH001164-ZG-1

08/17/20 17:36:10

QEH001164-ZG-1 #7-35 RT: 0.07-0.32 AV: 14 NL: 4.28E9

T: FTMS + p ESI Full ms [100.0000-1000.0000]

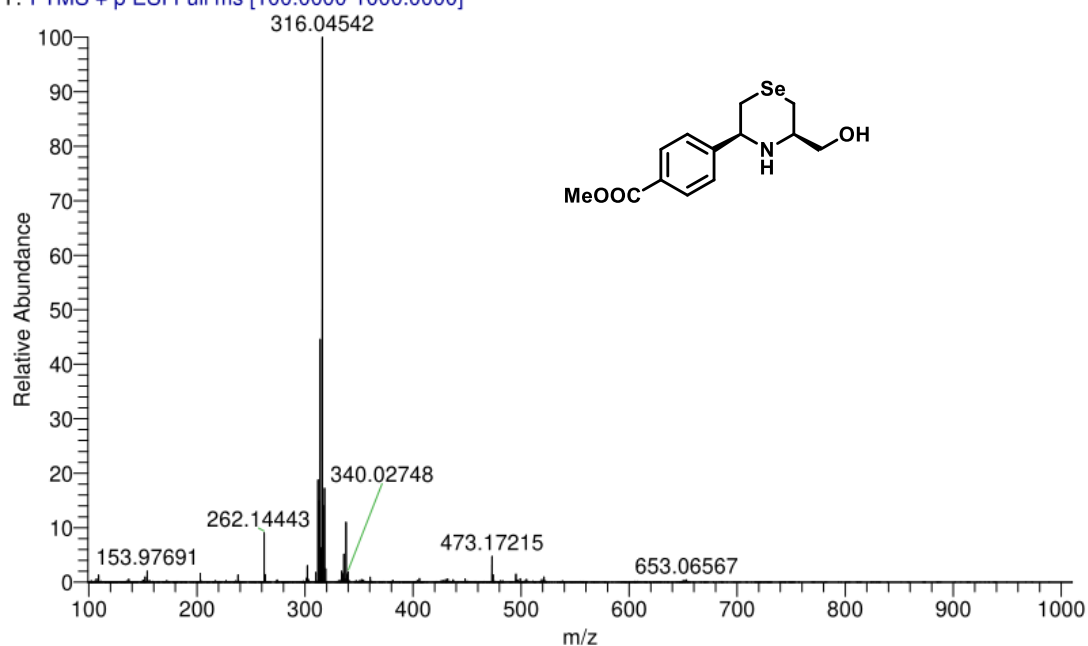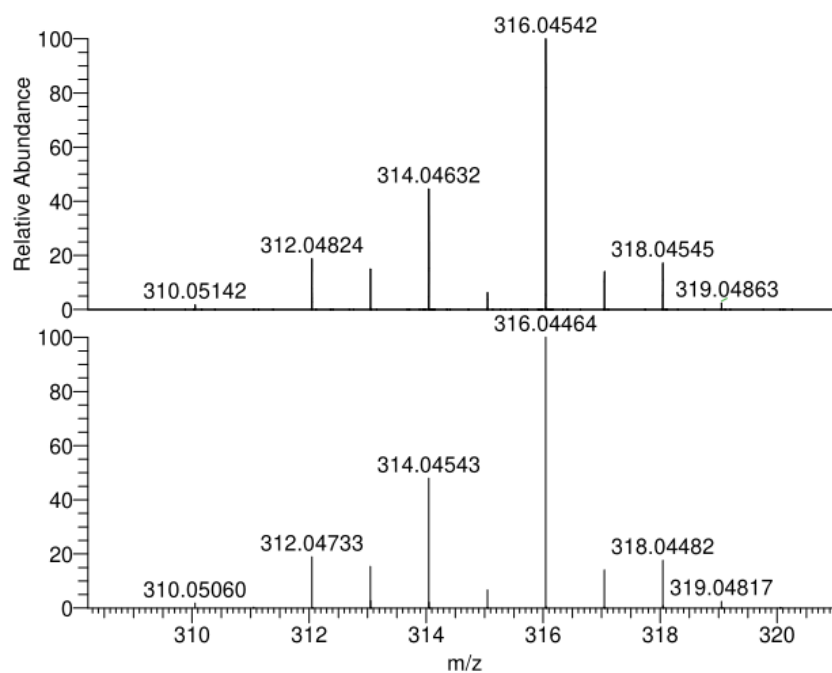

NL:  
4.28E9  
QEH001164-ZG-1#7-  
35 RT: 0.07-0.32 AV:  
14 T: FTMS + p ESI  
Full ms  
[100.0000-1000.0000]

NL:  
4.26E5  
C<sub>13</sub> H<sub>17</sub> NO<sub>3</sub> Se +H:  
C<sub>13</sub> H<sub>18</sub> N<sub>1</sub> O<sub>3</sub> Se<sub>1</sub>  
pa Chrg 1



# Compound 4b

D:\IAC2020\...\20200817ZG\QEH001164-ZG-2

08/17/20 17:41:57

QEH001164-ZG-2 #9-34 RT: 0.09-0.32 AV: 13 NL: 4.30E9

T: FTMS + p ESI Full ms [100.0000-1000.0000]

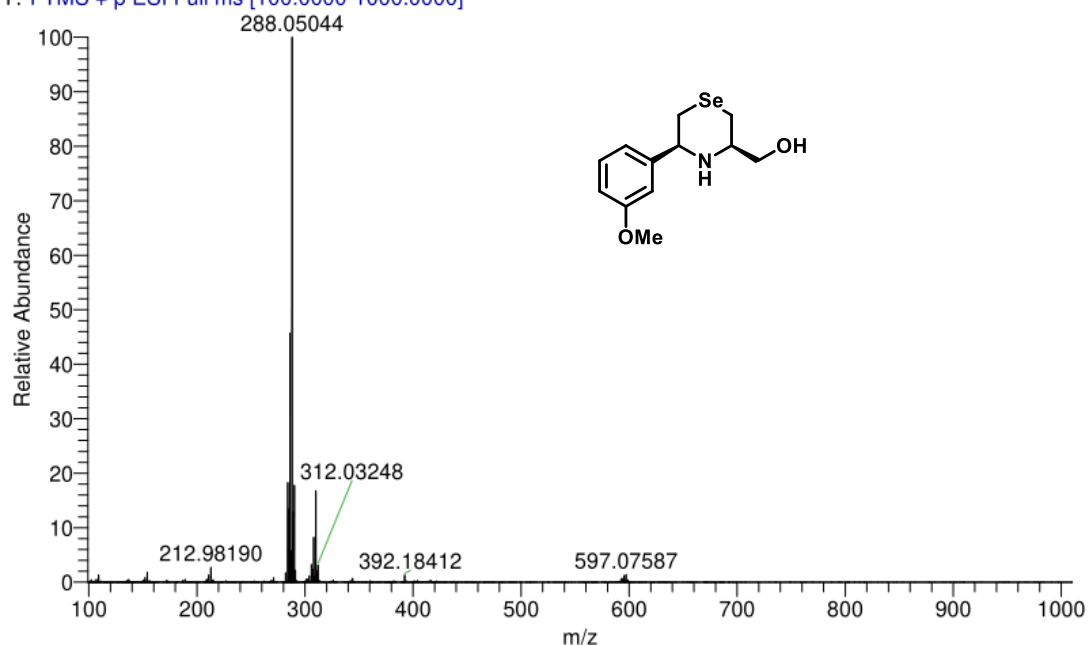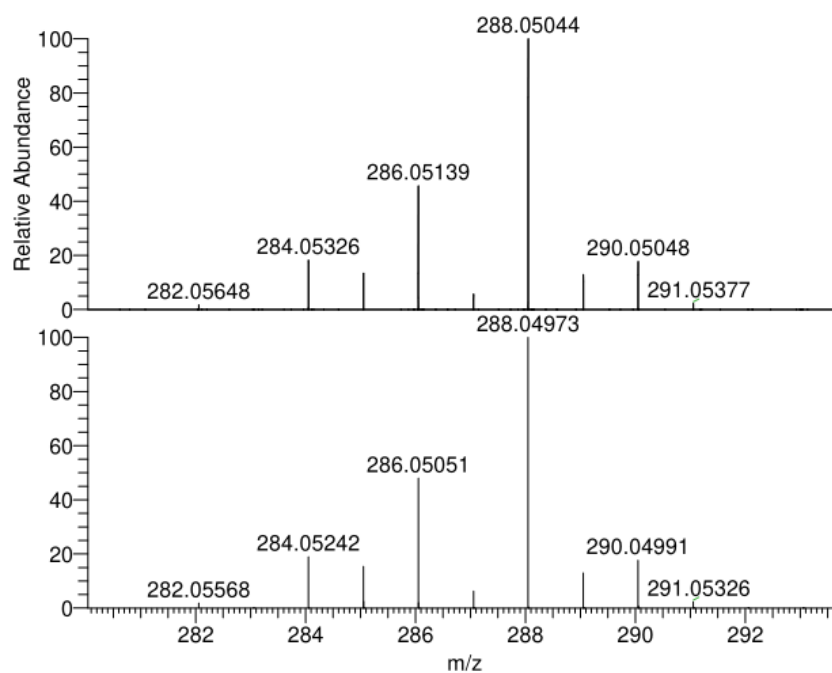

NL:  
4.30E9  
QEH001164-ZG-2#9-  
34 RT: 0.09-0.32 AV:  
13 T: FTMS + p ESI  
Full ms  
[100.0000-1000.0000]

NL:  
4.31E5  
C<sub>12</sub> H<sub>17</sub> NO<sub>2</sub> Se +H:  
C<sub>12</sub> H<sub>18</sub> N<sub>1</sub> O<sub>2</sub> Se<sub>1</sub>  
pa Chrg 1



# Compound 4c

D:\IAC2020\...\QEH001164-ZG-10

08/17/20 18:28:18

QEH001164-ZG-10 #8-38 RT: 0.07-0.36 AV: 16 NL: 9.68E8

T: FTMS + p ESI Full ms [100.0000-1000.0000]

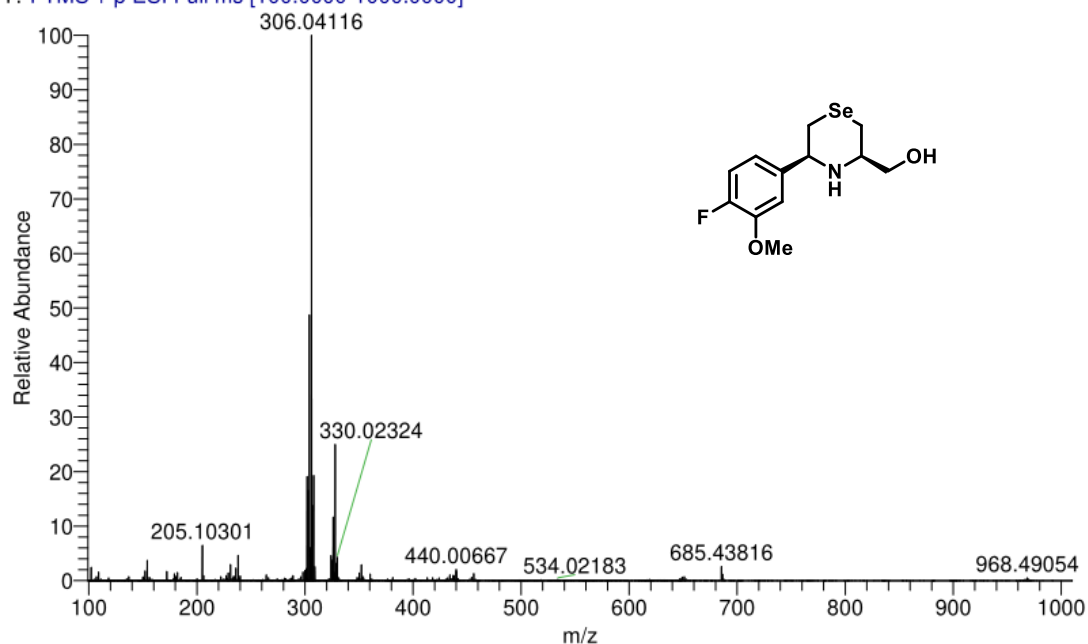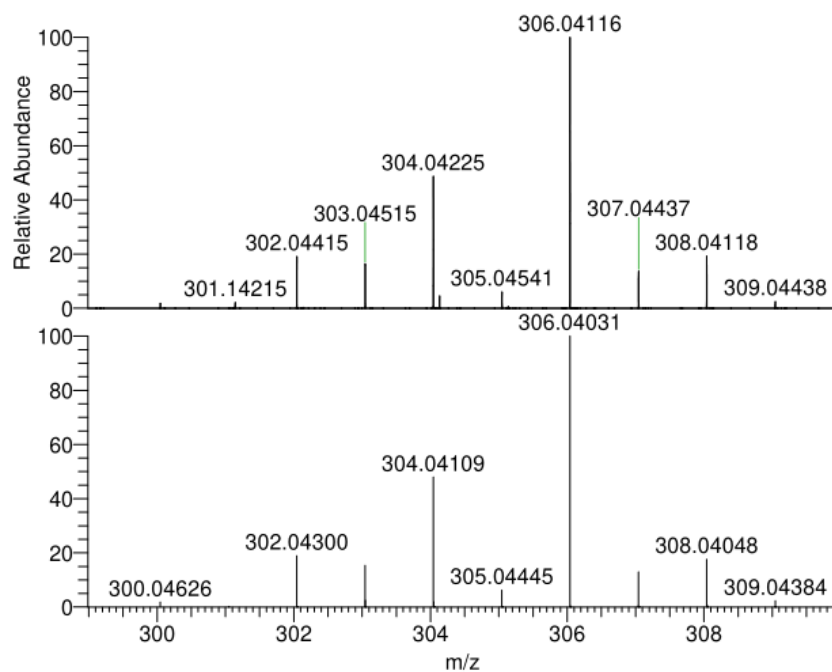

NL:  
9.68E8  
QEH001164-ZG-10#8-  
38 RT: 0.07-0.36 AV:  
16 T: FTMS + p ESI  
Full ms  
[100.0000-1000.0000]

NL:  
4.31E5  
C<sub>12</sub>H<sub>16</sub>FN<sub>2</sub>O<sub>2</sub>Se +H:  
C<sub>12</sub>H<sub>17</sub>F<sub>1</sub>N<sub>1</sub>O<sub>2</sub>Se<sub>1</sub>  
pa Chrg 1



## Compound 4d

D:\IAC2020\...\20200817ZG\QEH001164-ZG-3

08/17/20 17:47:45

QEH001164-ZG-3 #7-23 RT: 0.07-0.20 AV: 8 NL: 2.69E9

T: FTMS + p ESI Full ms [100.0000-1000.0000]

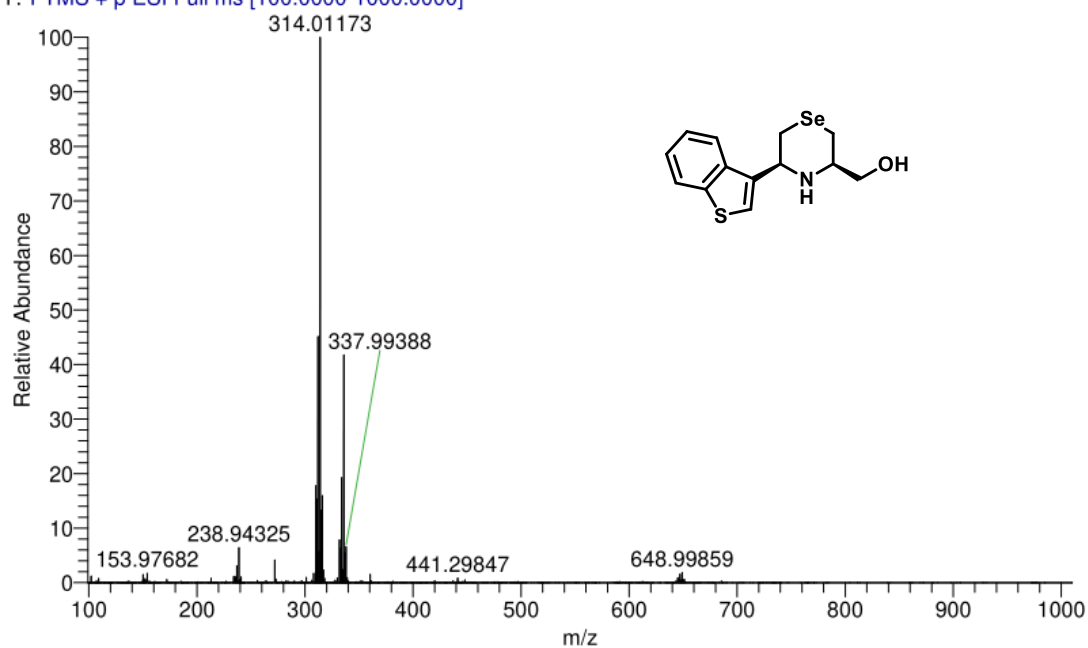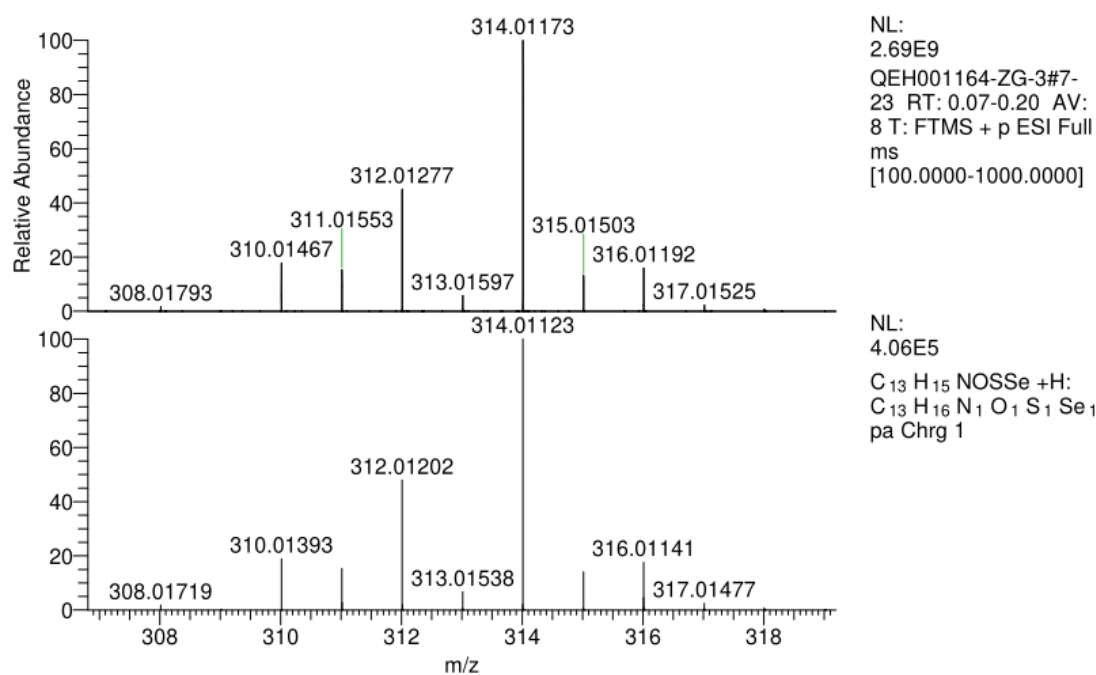



## Compound 5a

D:\IAC2020\...\20200817ZG\QEH001164-ZG-4

08/17/20 17:53:31

QEH001164-ZG-4 #8-28 RT: 0.07-0.26 AV: 11 NL: 1.85E9

T: FTMS + p ESI Full ms [100.0000-1000.0000]

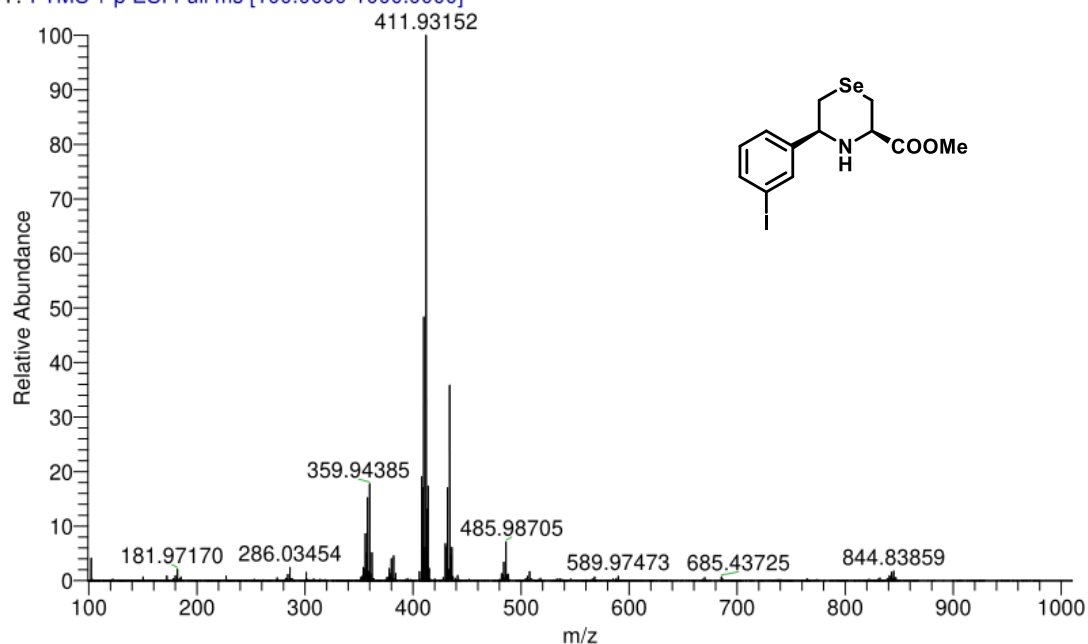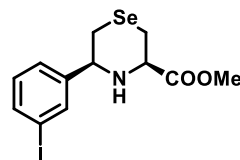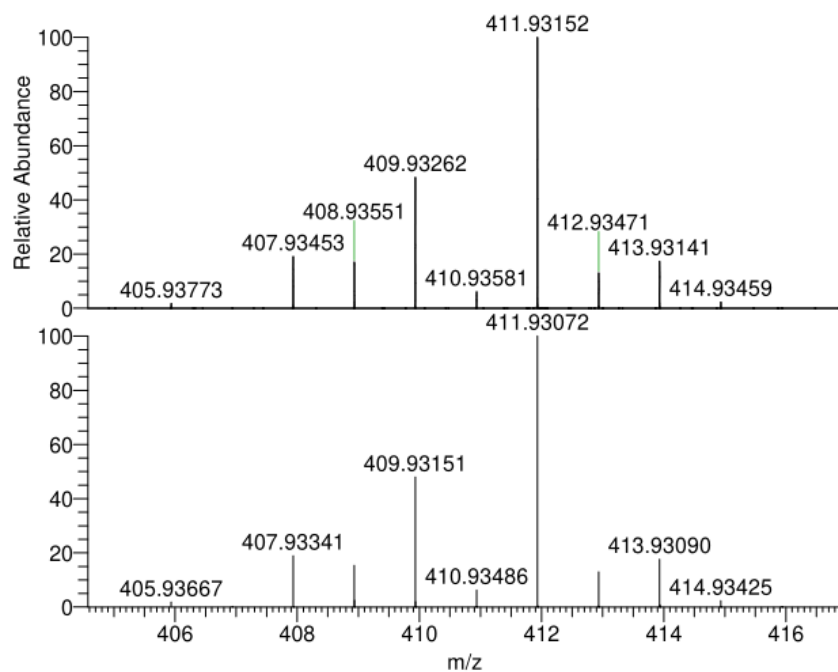

NL:  
1.85E9  
QEH001164-ZG-4#8-  
28 RT: 0.07-0.26 AV:  
11 T: FTMS + p ESI  
Full ms  
[100.0000-1000.0000]

NL:  
4.32E5  
C<sub>12</sub> H<sub>14</sub> I N O<sub>2</sub> Se +H:  
C<sub>12</sub> H<sub>15</sub> I<sub>1</sub> N<sub>1</sub> O<sub>2</sub> Se<sub>1</sub>  
pa Chrg 1



## Compound 5b

D:\IAC2020\...\20200817ZG\QEH001164-ZG-5

08/17/20 17:59:17

QEH001164-ZG-5 #9-35 RT: 0.09-0.32 AV: 13 NL: 1.46E9

T: FTMS + p ESI Full ms [100.0000-1000.0000]

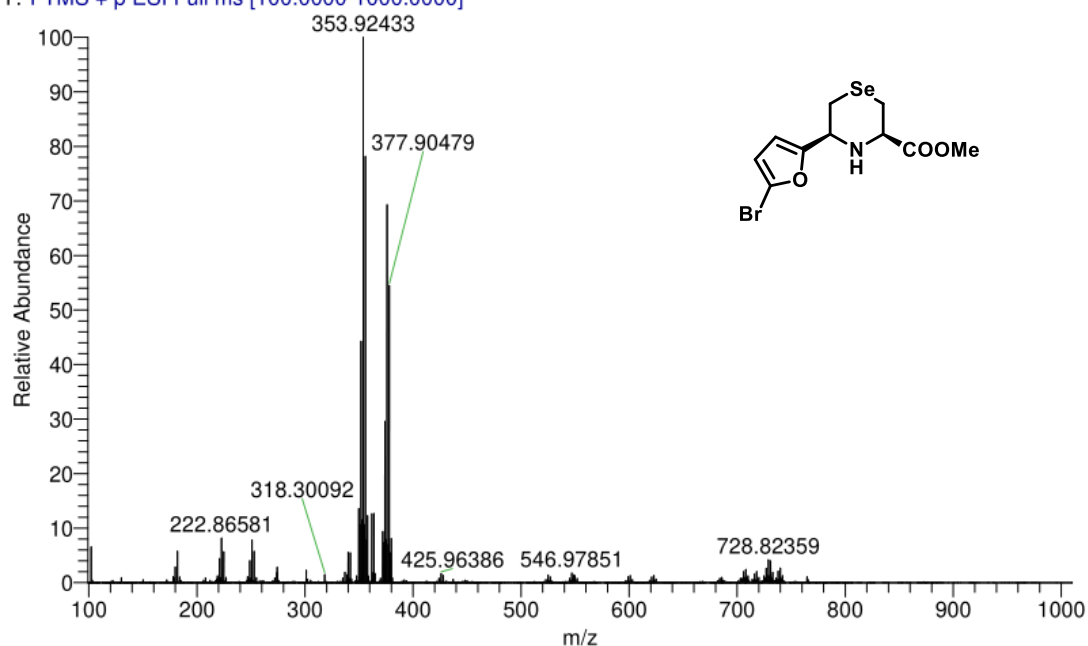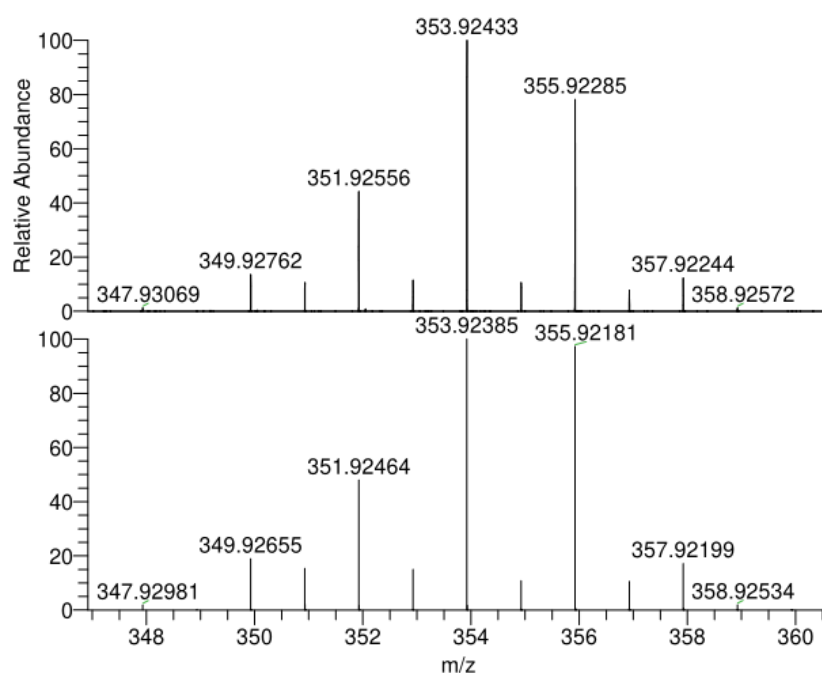

NL:  
1.46E9  
QEH001164-ZG-5#9-35  
RT: 0.09-0.32 AV: 13  
T: FTMS + p ESI Full  
ms  
[100.0000-1000.0000]

NL:  
2.23E5  
C<sub>10</sub> H<sub>12</sub> BrNO<sub>3</sub> Se +H:  
C<sub>10</sub> H<sub>13</sub> Br<sub>1</sub> N<sub>1</sub> O<sub>3</sub> Se<sub>1</sub>  
pa Chrg 1



## Compound 6a

RAJAVEL/ZHOU GUAN

|             |                                          |                       |                      |
|-------------|------------------------------------------|-----------------------|----------------------|
| Method:     | 20190614-50_3000-pos-ZHOUGUAN.m          | Acquisition Date:     | 6/14/2019 2:17:51 PM |
| File Name:  | D:\Data\IAC TEST\YSY\20190614\17-MAMUL.d | Operator:             | Shuyang Yang / XZ    |
| Source Type | ESI                                      | Ion Polarity          | Positive             |
| Focus       | Active                                   | Set Capillary         | 3000 V               |
| Scan Begin  | 50 m/z                                   | Set End Plate Offset  | -500 V               |
| Scan End    | 3000 m/z                                 | Set Collision Cell RF | 500.0 Vpp            |
|             |                                          | Set Nebulizer         | 0.2 Bar              |
|             |                                          | Set Dry Heater        | 170 °C               |
|             |                                          | Set Dry Gas           | 3.0 l/min            |
|             |                                          | Set Divert Valve      | Source               |

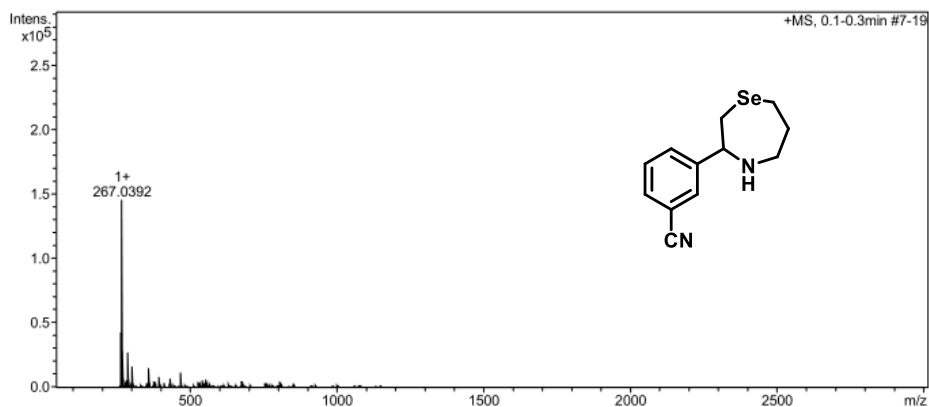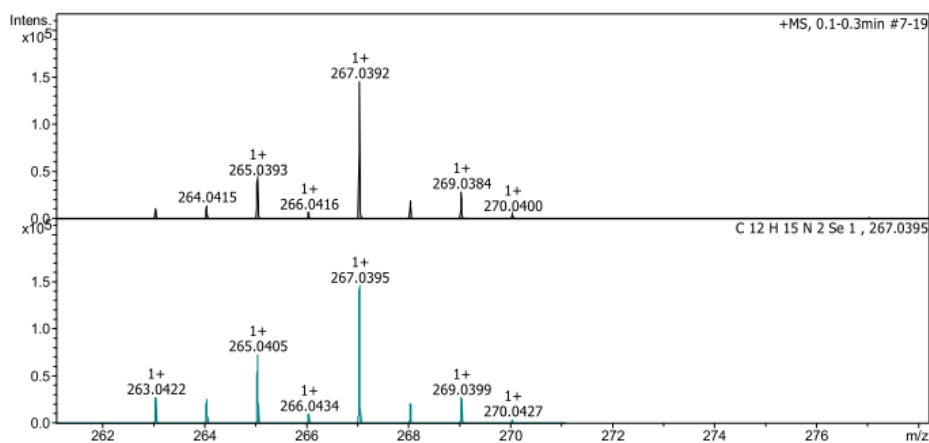



# RAJAVEL/ZHOU GUAN

## Evaluation Spectra / Validation Formula:

| Meas. m/z  | # | Ion Formula | Score  | m/z        | err [mDa] | err [ppm] | mSigma | rdb | e <sup>-</sup> Conf | N-Rule | Adduct |
|------------|---|-------------|--------|------------|-----------|-----------|--------|-----|---------------------|--------|--------|
| 267.039219 | 1 | C12H15N2Se  | 100.00 | 267.039526 | -0.3      | -1.2      | 83.0   | 6.5 | even                | ok     | M+H    |

## Calibration Info:

Date: 6/14/2019 2:33:12 PM  
Polarity: Positive  
Calibration spectrum: +MS, 4.5-4.7min #270-279: Scan  
Reference mass list: ESI: Tuning Mix ES-TOF (ESI) (pos)  
Calibration mode: Enhanced Quadratic

| Reference m/z | Resulting m/z | Intensity | Error [ppm] |
|---------------|---------------|-----------|-------------|
| 118.0863      |               |           |             |
| 322.0481      |               |           |             |
| 622.0290      | 622.0289      | 15971     | -0.087      |
| 922.0098      | 922.0102      | 40359     | 0.406       |
| 1221.9906     | 1221.9898     | 49790     | -0.693      |
| 1521.9715     | 1521.9724     | 55249     | 0.596       |
| 1821.9523     | 1821.9516     | 38469     | -0.399      |
| 2121.9332     | 2121.9337     | 40176     | 0.272       |
| 2421.9140     | 2421.9138     | 9105      | -0.095      |
| 2721.8948     |               |           |             |

Standard deviation: 0.673

## Mass List:

| #  | m/z      | Res.  | S/N    | I %   | FWHM   |
|----|----------|-------|--------|-------|--------|
| 1  | 263.0398 | 10504 | 442.1  | 7.6   | 0.0250 |
| 2  | 264.0415 | 12014 | 572.6  | 9.9   | 0.0220 |
| 3  | 265.0393 | 11121 | 1702.3 | 29.5  | 0.0238 |
| 4  | 266.0416 | 10520 | 261.1  | 4.5   | 0.0253 |
| 5  | 267.0392 | 15531 | 5775.0 | 100.0 | 0.0172 |
| 6  | 268.0404 | 11735 | 783.5  | 13.6  | 0.0228 |
| 7  | 269.0384 | 11820 | 1138.1 | 19.8  | 0.0228 |
| 8  | 270.0400 | 11276 | 175.9  | 3.1   | 0.0239 |
| 9  | 283.0322 | 10839 | 153.2  | 2.8   | 0.0261 |
| 10 | 285.0237 | 11294 | 198.4  | 3.6   | 0.0252 |
| 11 | 286.0249 | 11624 | 161.4  | 2.9   | 0.0246 |
| 12 | 287.0206 | 10660 | 424.7  | 7.8   | 0.0269 |
| 13 | 289.0207 | 12033 | 999.0  | 18.4  | 0.0240 |
| 14 | 290.0224 | 11474 | 153.5  | 2.8   | 0.0253 |
| 15 | 291.0196 | 13096 | 222.0  | 4.1   | 0.0222 |
| 16 | 300.1922 | 13426 | 120.2  | 2.3   | 0.0224 |
| 17 | 304.2603 | 12049 | 578.1  | 11.3  | 0.0253 |
| 18 | 305.2625 | 11894 | 119.1  | 2.3   | 0.0257 |
| 19 | 353.2658 | 11817 | 101.7  | 2.3   | 0.0299 |
| 20 | 360.3233 | 13031 | 434.6  | 10.1  | 0.0277 |
| 21 | 361.3217 | 12505 | 117.2  | 2.7   | 0.0289 |
| 22 | 380.0652 | 12528 | 130.5  | 3.3   | 0.0303 |
| 23 | 381.2967 | 12322 | 96.8   | 2.5   | 0.0309 |
| 24 | 393.2977 | 11908 | 208.7  | 5.4   | 0.0330 |
| 25 | 413.2658 | 11951 | 90.5   | 2.4   | 0.0346 |
| 26 | 432.0758 | 11466 | 84.3   | 2.3   | 0.0377 |
| 27 | 434.0750 | 13291 | 176.3  | 4.9   | 0.0327 |
| 28 | 467.1023 | 13314 | 257.8  | 7.9   | 0.0351 |
| 29 | 468.1028 | 13030 | 115.9  | 3.5   | 0.0359 |
| 30 | 469.0994 | 11498 | 72.2   | 2.2   | 0.0408 |
| 31 | 531.0705 | 11917 | 71.1   | 2.5   | 0.0446 |
| 32 | 533.0704 | 13269 | 81.2   | 2.8   | 0.0402 |
| 33 | 541.1215 | 13206 | 106.7  | 3.8   | 0.0410 |
| 34 | 551.0526 | 13161 | 63.1   | 2.3   | 0.0419 |
| 35 | 553.0533 | 13922 | 105.9  | 3.8   | 0.0397 |
| 36 | 555.0510 | 12908 | 112.1  | 4.1   | 0.0430 |
| 37 | 557.0823 | 8654  | 78.5   | 2.9   | 0.0644 |
| 38 | 676.1215 | 12190 | 76.8   | 3.2   | 0.0555 |
| 39 | 678.1222 | 13039 | 84.0   | 3.5   | 0.0520 |
| 40 | 758.2098 | 12765 | 53.8   | 2.3   | 0.0594 |
| #  | m/z      | Res.  | S/N    | I %   | FWHM   |
| 1  | 261.0455 | 15182 |        | 1.8   | 0.0172 |
| 2  | 262.0488 | 15241 |        | 0.2   | 0.0172 |
| 3  | 263.0422 | 15298 |        | 18.8  | 0.0172 |
| 4  | 264.0432 | 15357 |        | 17.9  | 0.0172 |



RAJAVEL/ZHOU GUAN

---

| #  | m/z      | Res.  | S/N | I %   | FWHM   |
|----|----------|-------|-----|-------|--------|
| 5  | 265.0405 | 15415 |     | 50.0  | 0.0172 |
| 6  | 266.0434 | 15473 |     | 6.8   | 0.0172 |
| 7  | 267.0395 | 15531 |     | 100.0 | 0.0172 |
| 8  | 268.0426 | 15589 |     | 13.8  | 0.0172 |
| 9  | 269.0399 | 15647 |     | 18.4  | 0.0172 |
| 10 | 270.0427 | 15705 |     | 2.4   | 0.0172 |
| 11 | 271.0464 | 15764 |     | 0.2   | 0.0172 |



# Compound 6b

RAJAVEL/ZHOU GUAN

|             |                                                   |                       |                     |
|-------------|---------------------------------------------------|-----------------------|---------------------|
| Method:     | 20190603-50_3000-pos.m                            | Acquisition Date:     | 6/5/2019 6:19:12 PM |
| File Name:  | D:\Data\IAC                                       | Operator:             | Shuyang Yang / XZ   |
| Source Type | TEST\YSY\20190605\ZHOU GUAN-2\18_P1-B-4_01_8989.d |                       |                     |
| Focus       | ESI                                               | Ion Polarity          | Positive            |
| Scan Begin  | Active                                            | Set Capillary         | 3500 V              |
| Scan End    | 50 m/z                                            | Set End Plate Offset  | -500 V              |
|             | 3000 m/z                                          | Set Collision Cell RF | 600.0 Vpp           |
|             |                                                   | Set Nebulizer         | 0.3 Bar             |
|             |                                                   | Set Dry Heater        | 180 °C              |
|             |                                                   | Set Dry Gas           | 4.0 l/min           |
|             |                                                   | Set Divert Valve      | Source              |

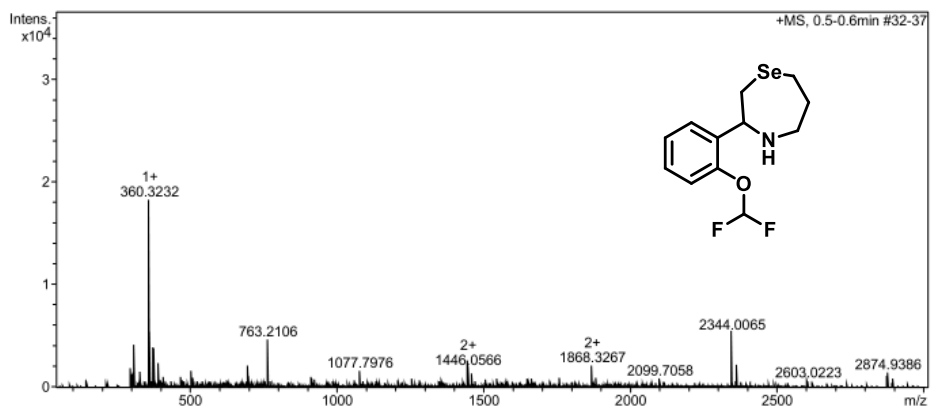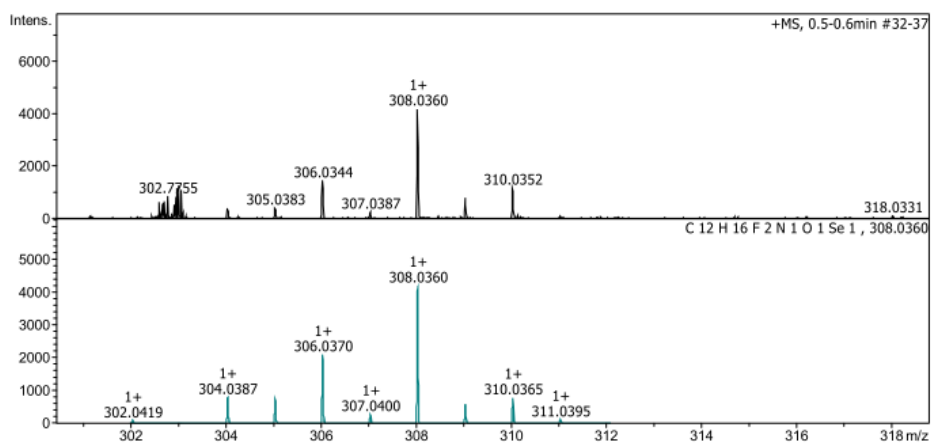



# RAJAVEL/ZHOU GUAN

## Evaluation Spectra / Validation Formula:

| Meas. m/z  | # | Ion Formula  | Score  | m/z        | err [mDa] | err [ppm] | mSigma | rdB | e <sup>-</sup> Conf | N-Rule | Adduct |
|------------|---|--------------|--------|------------|-----------|-----------|--------|-----|---------------------|--------|--------|
| 308.035994 | 1 | C12H16F2NOSe | 100.00 | 308.036004 | 0.0       | 0.0       | 75.1   | 4.5 | even                | ok     | M+H    |

## Calibration Info:

Date: 6/10/2019 5:08:25 PM  
Polarity: Positive  
Calibration spectrum: +MS, 4.5-4.6min #270-272: Scan  
Reference mass list: ESI: Tuning Mix ES-TOF (ESI) (pos)  
Calibration mode: Enhanced Quadratic

| Reference m/z | Resulting m/z | Intensity | Error [ppm] |
|---------------|---------------|-----------|-------------|
| 118.0863      |               |           |             |
| 322.0481      | 322.0483      | 247       | 0.574       |
| 622.0290      | 622.0281      | 12716     | -1.378      |
| 922.0098      | 922.0096      | 32067     | -0.191      |
| 1221.9906     | 1221.9916     | 39589     | 0.751       |
| 1521.9715     | 1521.9731     | 36812     | 1.090       |
| 1821.9523     | 1821.9535     | 23869     | 0.677       |
| 2121.9332     | 2121.9335     | 25397     | 0.173       |
| 2421.9140     | 2421.9036     | 6865      | -4.285      |
| 2721.8948     | 2721.9019     | 1336      | 2.590       |

Standard deviation: 2.509

## Mass List:

| #  | m/z       | Res.  | S/N   | I %   | FWHM   |
|----|-----------|-------|-------|-------|--------|
| 1  | 296.9504  | 24619 | 73.3  | 8.4   | 0.0121 |
| 2  | 297.1620  | 25856 | 82.2  | 9.5   | 0.0115 |
| 3  | 302.7755  | 26341 | 40.6  | 4.7   | 0.0115 |
| 4  | 306.0344  | 9754  | 67.8  | 8.0   | 0.0314 |
| 5  | 308.0360  | 12621 | 194.5 | 23.0  | 0.0244 |
| 6  | 310.0352  | 11875 | 54.3  | 6.4   | 0.0261 |
| 7  | 328.0176  | 10350 | 38.3  | 4.8   | 0.0317 |
| 8  | 330.0168  | 9784  | 67.6  | 8.4   | 0.0337 |
| 9  | 360.3232  | 11520 | 748.1 | 100.0 | 0.0313 |
| 10 | 361.3248  | 12949 | 220.3 | 29.5  | 0.0279 |
| 11 | 374.0425  | 11501 | 38.5  | 5.3   | 0.0325 |
| 12 | 374.3010  | 12338 | 157.5 | 21.6  | 0.0303 |
| 13 | 375.3028  | 9381  | 33.5  | 4.6   | 0.0400 |
| 14 | 376.3180  | 13567 | 152.5 | 21.0  | 0.0277 |
| 15 | 377.3195  | 12335 | 36.3  | 5.0   | 0.0306 |
| 16 | 390.2971  | 12219 | 45.7  | 6.4   | 0.0319 |
| 17 | 392.3125  | 13292 | 90.7  | 12.8  | 0.0295 |
| 18 | 408.3071  | 10908 | 39.7  | 5.7   | 0.0374 |
| 19 | 467.1022  | 12178 | 34.2  | 5.6   | 0.0384 |
| 20 | 503.0659  | 7360  | 34.4  | 5.9   | 0.0683 |
| 21 | 503.3574  | 11329 | 46.5  | 8.0   | 0.0444 |
| 22 | 697.6581  | 12373 | 52.3  | 11.6  | 0.0564 |
| 23 | 698.6544  | 12886 | 27.2  | 6.0   | 0.0542 |
| 24 | 763.2106  | 37257 | 109.3 | 25.4  | 0.0205 |
| 25 | 763.5698  | 13888 | 68.3  | 15.9  | 0.0550 |
| 26 | 913.9277  | 36707 | 18.6  | 4.7   | 0.0249 |
| 27 | 1077.7976 | 36796 | 33.2  | 8.8   | 0.0293 |
| 28 | 1445.5678 | 36475 | 28.9  | 8.3   | 0.0396 |
| 29 | 1446.0566 | 13934 | 35.5  | 10.1  | 0.1038 |
| 30 | 1458.4012 | 54837 | 19.5  | 5.6   | 0.0266 |
| 31 | 1546.5501 | 54488 | 16.6  | 4.7   | 0.0284 |
| 32 | 1664.1909 | 48351 | 16.3  | 4.6   | 0.0344 |
| 33 | 1757.1776 | 51909 | 18.4  | 5.0   | 0.0339 |
| 34 | 1867.7858 | 13527 | 23.5  | 6.1   | 0.1381 |
| 35 | 1868.3267 | 44183 | 44.1  | 11.5  | 0.0423 |
| 36 | 2099.7058 | 56079 | 20.4  | 4.6   | 0.0374 |
| 37 | 2344.0065 | 63719 | 152.5 | 29.0  | 0.0368 |
| 38 | 2344.6403 | 50488 | 82.0  | 15.6  | 0.0464 |
| 39 | 2360.3315 | 66223 | 24.8  | 4.7   | 0.0356 |
| 40 | 2874.9386 | 69007 | 59.6  | 7.9   | 0.0417 |
| #  | m/z       | Res.  | S/N   | I %   | FWHM   |
| 1  | 302.0419  | 12376 |       | 1.8   | 0.0244 |
| 2  | 303.0453  | 12417 |       | 0.2   | 0.0244 |
| 3  | 304.0387  | 12458 |       | 18.8  | 0.0244 |
| 4  | 305.0397  | 12499 |       | 17.8  | 0.0244 |



RAJAVEL/ZHOU GUAN

| #  | m/z      | Res.  | S/N | I %   | FWHM   |
|----|----------|-------|-----|-------|--------|
| 5  | 306.0370 | 12539 |     | 49.9  | 0.0244 |
| 6  | 307.0400 | 12581 |     | 6.6   | 0.0244 |
| 7  | 308.0360 | 12621 |     | 100.0 | 0.0244 |
| 8  | 309.0392 | 12662 |     | 13.5  | 0.0244 |
| 9  | 310.0365 | 12703 |     | 18.6  | 0.0244 |
| 10 | 311.0395 | 12744 |     | 2.4   | 0.0244 |
| 11 | 312.0429 | 12786 |     | 0.2   | 0.0244 |



# Compound 6c

RAJAVEL/ZHOU GUAN

|             |                                                   |                       |                   |                      |
|-------------|---------------------------------------------------|-----------------------|-------------------|----------------------|
| Method:     | 20190603-50_3000-pos.m                            |                       | Acquisition Date: | 6/13/2019 6:30:52 PM |
| File Name:  | D:\Data\IAC TEST\YSY\20190613\19_P1-A-9_01_9046.d |                       | Operator:         | Shuyang Yang / XZ    |
| Source Type | ESI                                               | Ion Polarity          | Positive          | Set Nebulizer        |
| Focus       | Active                                            | Set Capillary         | 3500 V            | Set Dry Heater       |
| Scan Begin  | 50 m/z                                            | Set End Plate Offset  | -500 V            | Set Dry Gas          |
| Scan End    | 3000 m/z                                          | Set Collision Cell RF | 600.0 Vpp         | Set Divert Valve     |
|             |                                                   |                       |                   | Source               |

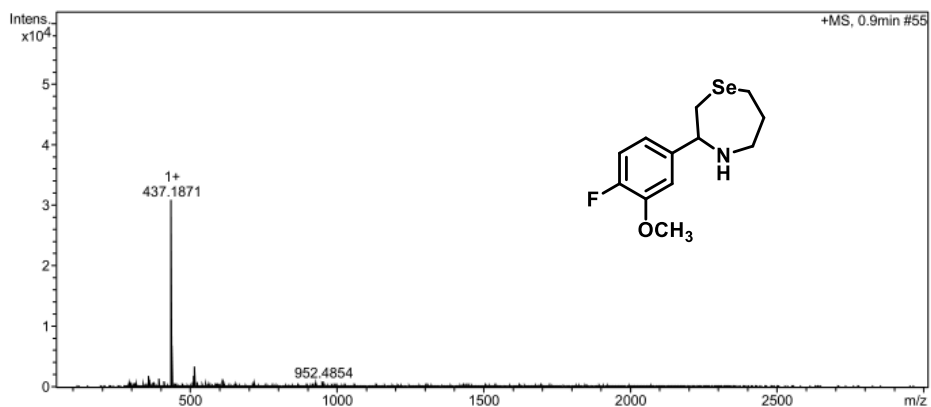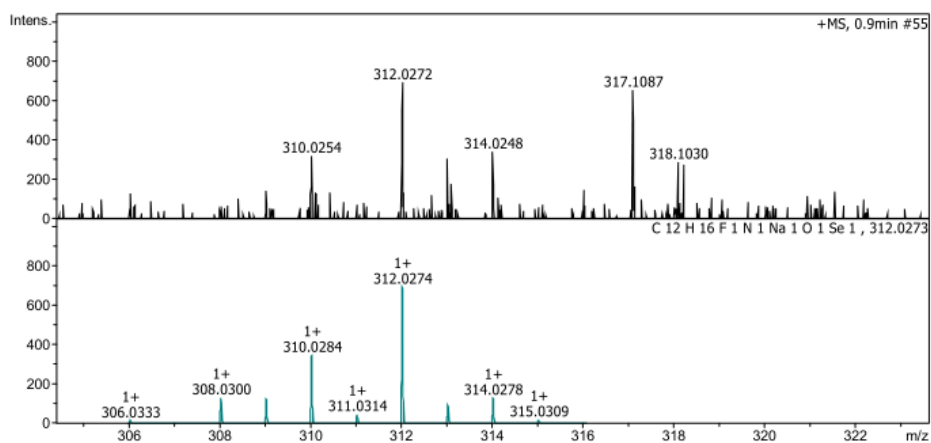



## Evaluation Spectra / Validation Formula:

| Meas. m/z  | # | Ion Formula   | Score  | m/z        | err [mDa] | err [ppm] | mSigma | rdb | e <sup>-</sup> Conf | N-Rule | Adduct |
|------------|---|---------------|--------|------------|-----------|-----------|--------|-----|---------------------|--------|--------|
| 312.027193 | 1 | C12H16FNNaOSe | 100.00 | 312.027370 | -0.2      | -0.6      | 353.9  | 4.5 | even                | ok     | M+Na   |

## Calibration Info:

Date: 6/14/2019 9:44:14 AM  
Polarity: Positive  
Calibration spectrum: +MS, 4.5-4.7min #270-278: Scan  
Reference mass list: ESI: Tuning Mix ES-TOF (ESI) (pos)  
Calibration mode: Enhanced Quadratic

| Reference m/z | Resulting m/z | Intensity | Error [ppm] |
|---------------|---------------|-----------|-------------|
| 118.0863      |               |           |             |
| 322.0481      |               |           |             |
| 622.0290      | 622.0289      | 17315     | -0.072      |
| 922.0098      | 922.0101      | 43304     | 0.336       |
| 1221.9906     | 1221.9899     | 53130     | -0.565      |
| 1521.9715     | 1521.9722     | 58986     | 0.464       |
| 1821.9523     | 1821.9518     | 41837     | -0.290      |
| 2121.9332     | 2121.9336     | 44405     | 0.199       |
| 2421.9140     | 2421.9138     | 10002     | -0.073      |
| 2721.8948     |               |           |             |

Standard deviation: 0.532

## Mass List:

| #  | m/z      | Res.  | S/N   | I %   | FWHM   |
|----|----------|-------|-------|-------|--------|
| 1  | 294.0466 | 14332 | 2.5   | 1.4   | 0.0205 |
| 2  | 298.1734 | 18050 | 3.1   | 1.7   | 0.0165 |
| 3  | 300.1820 | 14950 | 4.6   | 2.6   | 0.0201 |
| 4  | 312.0272 | 11883 | 4.0   | 2.2   | 0.0263 |
| 5  | 317.1087 | 9992  | 3.8   | 2.1   | 0.0317 |
| 6  | 341.2649 | 20565 | 3.3   | 1.8   | 0.0166 |
| 7  | 360.3205 | 13192 | 11.0  | 6.0   | 0.0273 |
| 8  | 361.2841 | 12820 | 7.6   | 4.1   | 0.0282 |
| 9  | 374.2986 | 23499 | 3.7   | 2.0   | 0.0159 |
| 10 | 375.2568 | 23178 | 4.7   | 2.5   | 0.0162 |
| 11 | 376.3126 | 20027 | 5.4   | 2.9   | 0.0188 |
| 12 | 393.2961 | 9613  | 9.3   | 5.0   | 0.0409 |
| 13 | 394.3125 | 6620  | 3.6   | 1.9   | 0.0596 |
| 14 | 413.2627 | 15612 | 6.0   | 3.2   | 0.0265 |
| 15 | 437.1871 | 13509 | 188.1 | 100.0 | 0.0324 |
| 16 | 438.1898 | 10450 | 42.1  | 22.4  | 0.0419 |
| 17 | 439.1857 | 10952 | 6.7   | 3.6   | 0.0401 |
| 18 | 511.1288 | 16101 | 5.2   | 2.7   | 0.0317 |
| 19 | 512.1267 | 14009 | 5.5   | 2.9   | 0.0366 |
| 20 | 513.1235 | 13622 | 11.9  | 6.2   | 0.0377 |
| 21 | 514.1283 | 13778 | 3.4   | 1.8   | 0.0373 |
| 22 | 515.1227 | 13011 | 21.8  | 11.3  | 0.0396 |
| 23 | 516.1256 | 8690  | 4.5   | 2.3   | 0.0594 |
| 24 | 517.1212 | 10949 | 6.7   | 3.5   | 0.0472 |
| 25 | 524.1611 | 11237 | 5.7   | 3.0   | 0.0466 |
| 26 | 525.1657 | 19481 | 3.2   | 1.7   | 0.0270 |
| 27 | 541.1176 | 28935 | 2.8   | 1.5   | 0.0187 |
| 28 | 553.4543 | 25517 | 4.2   | 2.2   | 0.0217 |
| 29 | 565.0943 | 23417 | 3.2   | 1.6   | 0.0241 |
| 30 | 611.0739 | 15266 | 3.8   | 2.0   | 0.0400 |
| 31 | 613.0712 | 13227 | 3.7   | 1.9   | 0.0463 |
| 32 | 615.0762 | 12570 | 3.6   | 1.9   | 0.0489 |
| 33 | 656.5482 | 26427 | 2.9   | 1.5   | 0.0248 |
| 34 | 716.9768 | 31847 | 3.3   | 1.6   | 0.0225 |
| 35 | 718.9830 | 11639 | 3.6   | 1.8   | 0.0618 |
| 36 | 927.6580 | 14525 | 4.8   | 2.2   | 0.0639 |
| 37 | 928.6550 | 18472 | 4.5   | 2.1   | 0.0503 |
| 38 | 949.4802 | 37211 | 3.5   | 1.6   | 0.0255 |
| 39 | 950.4891 | 11129 | 3.8   | 1.7   | 0.0854 |
| 40 | 952.4854 | 16042 | 7.1   | 3.2   | 0.0594 |
| #  | m/z      | Res.  | S/N   | I %   | FWHM   |
| 1  | 306.0333 | 11655 |       | 1.8   | 0.0263 |
| 2  | 307.0366 | 11693 |       | 0.2   | 0.0263 |
| 3  | 308.0300 | 11731 |       | 18.8  | 0.0263 |
| 4  | 309.0311 | 11769 |       | 17.8  | 0.0263 |



RAJAVEL/ZHOU GUAN

| #  | m/z      | Res.  | S/N | I %   | FWHM   |
|----|----------|-------|-----|-------|--------|
| 5  | 310.0284 | 11807 |     | 49.9  | 0.0263 |
| 6  | 311.0314 | 11845 |     | 6.6   | 0.0263 |
| 7  | 312.0274 | 11883 |     | 100.0 | 0.0263 |
| 8  | 313.0306 | 11921 |     | 13.5  | 0.0263 |
| 9  | 314.0278 | 11959 |     | 18.6  | 0.0263 |
| 10 | 315.0309 | 11997 |     | 2.4   | 0.0263 |
| 11 | 316.0342 | 12035 |     | 0.2   | 0.0263 |



# Compound 6d

RAJAVEL/ZHOU GUAN

|             |                                                   |                       |                      |
|-------------|---------------------------------------------------|-----------------------|----------------------|
| Method:     | 20190603-50_3000-pos.m                            | Acquisition Date:     | 6/13/2019 6:36:45 PM |
| File Name:  | D:\Data\IAC TEST\YSY\20190613\22_P1-B-1_01_9047.d | Operator:             | Shuyang Yang / XZ    |
| Source Type | ESI                                               | Ion Polarity          | Positive             |
| Focus       | Active                                            | Set Capillary         | 3500 V               |
| Scan Begin  | 50 m/z                                            | Set End Plate Offset  | -500 V               |
| Scan End    | 3000 m/z                                          | Set Collision Cell RF | 600.0 Vpp            |
|             |                                                   | Set Nebulizer         | 0.3 Bar              |
|             |                                                   | Set Dry Heater        | 180 °C               |
|             |                                                   | Set Dry Gas           | 4.0 l/min            |
|             |                                                   | Set Divert Valve      | Source               |

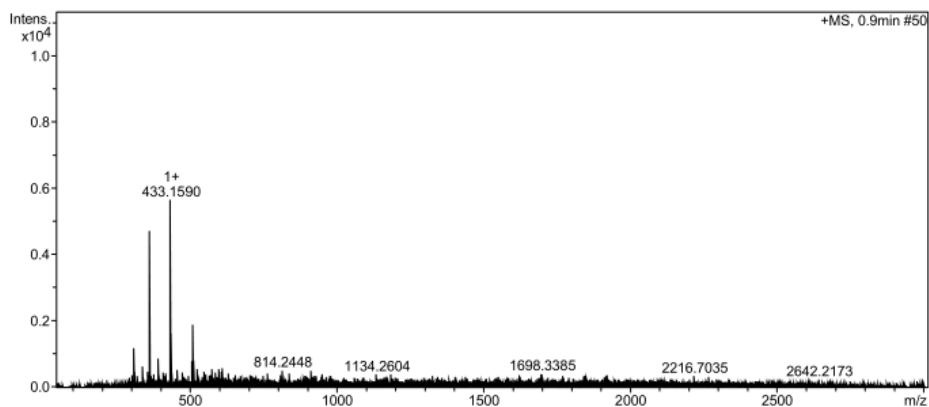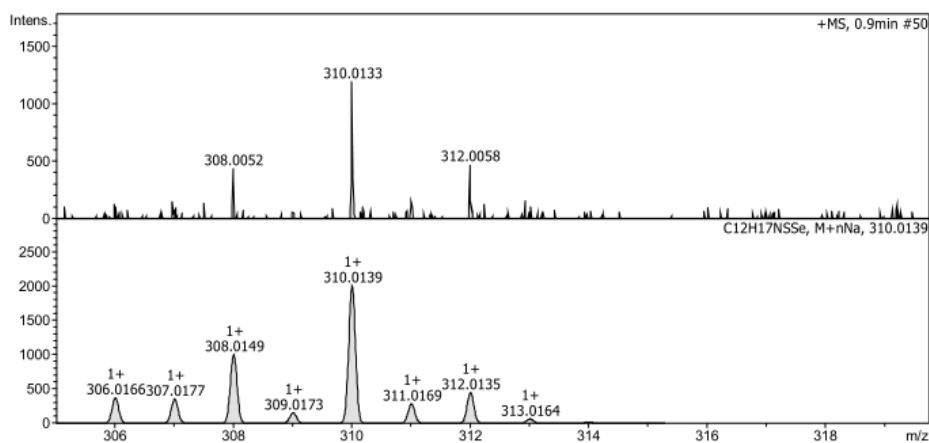



## Evaluation Spectra / Validation Formula:

## Calibration Info:

Date: 6/14/2019 9:47:56 AM  
Polarity: Positive  
Calibration spectrum: +MS, 4.5-4.7min #270-279: Scan  
Reference mass list: ESI: Tuning Mix ES-TOF (ESI) (pos)  
Calibration mode: Enhanced Quadratic

| Reference m/z | Resulting m/z | Intensity | Error [ppm] |
|---------------|---------------|-----------|-------------|
| 118.0863      |               |           |             |
| 322.0481      |               |           |             |
| 622.0290      | 622.0289      | 15971     | -0.087      |
| 922.0098      | 922.0102      | 40359     | 0.406       |
| 1221.9906     | 1221.9898     | 49790     | -0.693      |
| 1521.9715     | 1521.9724     | 55249     | 0.596       |
| 1821.9523     | 1821.9516     | 38469     | -0.399      |
| 2121.9332     | 2121.9337     | 40176     | 0.272       |
| 2421.9140     | 2421.9138     | 9105      | -0.095      |
| 2721.8948     |               |           |             |

Standard deviation: 0.673

## Mass List:

| #  | m/z       | Res.  | S/N  | I %   | FWHM   |
|----|-----------|-------|------|-------|--------|
| 1  | 308.0052  | 13714 | 2.6  | 7.7   | 0.0225 |
| 2  | 310.0133  | 19707 | 7.1  | 21.1  | 0.0157 |
| 3  | 312.0058  | 19936 | 2.8  | 8.4   | 0.0157 |
| 4  | 339.2961  | 13360 | 3.9  | 11.3  | 0.0254 |
| 5  | 355.2799  | 20257 | 2.8  | 8.2   | 0.0175 |
| 6  | 361.2806  | 11670 | 28.6 | 83.3  | 0.0310 |
| 7  | 362.2870  | 14483 | 6.4  | 18.7  | 0.0250 |
| 8  | 376.3146  | 15593 | 2.4  | 7.0   | 0.0241 |
| 9  | 391.2762  | 14284 | 5.4  | 15.4  | 0.0274 |
| 10 | 392.3105  | 8188  | 2.6  | 7.4   | 0.0479 |
| 11 | 408.0109  | 7593  | 2.7  | 7.8   | 0.0537 |
| 12 | 419.2690  | 27754 | 2.6  | 7.4   | 0.0151 |
| 13 | 433.1590  | 15421 | 35.4 | 100.0 | 0.0281 |
| 14 | 434.1605  | 14894 | 9.4  | 26.5  | 0.0292 |
| 15 | 435.1564  | 18508 | 7.3  | 20.6  | 0.0235 |
| 16 | 437.1875  | 12821 | 10.3 | 29.0  | 0.0341 |
| 17 | 438.1945  | 13569 | 2.6  | 7.4   | 0.0323 |
| 18 | 455.9754  | 29897 | 3.4  | 9.4   | 0.0153 |
| 19 | 475.3312  | 14647 | 2.8  | 7.8   | 0.0325 |
| 20 | 507.0995  | 23765 | 5.1  | 14.0  | 0.0213 |
| 21 | 509.0965  | 14936 | 7.5  | 20.6  | 0.0341 |
| 22 | 511.0973  | 11851 | 12.2 | 33.7  | 0.0431 |
| 23 | 513.0965  | 7818  | 5.2  | 14.3  | 0.0656 |
| 24 | 525.2788  | 14060 | 3.6  | 9.9   | 0.0374 |
| 25 | 547.2535  | 26210 | 3.2  | 8.6   | 0.0209 |
| 26 | 575.0557  | 14534 | 3.7  | 10.1  | 0.0396 |
| 27 | 587.0570  | 17822 | 3.0  | 8.2   | 0.0329 |
| 28 | 599.0796  | 26298 | 3.6  | 9.6   | 0.0228 |
| 29 | 607.0512  | 11126 | 3.1  | 8.3   | 0.0546 |
| 30 | 609.0449  | 12730 | 3.5  | 9.4   | 0.0478 |
| 31 | 611.0462  | 8227  | 3.8  | 10.1  | 0.0743 |
| 32 | 763.1696  | 14955 | 3.0  | 7.5   | 0.0510 |
| 33 | 814.2448  | 36530 | 3.6  | 9.1   | 0.0223 |
| 34 | 837.1942  | 17957 | 3.0  | 7.6   | 0.0466 |
| 35 | 911.2052  | 24608 | 3.5  | 8.7   | 0.0370 |
| 36 | 950.4788  | 10222 | 2.9  | 7.0   | 0.0930 |
| 37 | 1134.2604 | 46107 | 3.0  | 7.0   | 0.0246 |
| 38 | 1184.9427 | 50402 | 3.0  | 7.0   | 0.0235 |
| 39 | 1695.3979 | 38883 | 3.2  | 7.1   | 0.0436 |
| 40 | 1698.3385 | 50890 | 3.2  | 7.2   | 0.0334 |

| # | m/z      | Res. | S/N | I %  | FWHM   |
|---|----------|------|-----|------|--------|
| 1 | 304.0199 | 2384 |     | 1.7  | 0.1275 |
| 2 | 305.0232 | 2392 |     | 0.3  | 0.1275 |
| 3 | 306.0166 | 2400 |     | 18.5 | 0.1275 |
| 4 | 307.0177 | 2408 |     | 17.6 | 0.1275 |
| 5 | 308.0149 | 2416 |     | 49.8 | 0.1275 |
| 6 | 309.0173 | 2424 |     | 7.6  | 0.1275 |



RAJAVEL/ZHOU GUAN

---

| #  | m/z      | Res. | S/N | I %   | FWHM   |
|----|----------|------|-----|-------|--------|
| 7  | 310.0139 | 2431 |     | 100.0 | 0.1275 |
| 8  | 311.0169 | 2439 |     | 14.2  | 0.1275 |
| 9  | 312.0135 | 2447 |     | 22.4  | 0.1275 |
| 10 | 313.0164 | 2455 |     | 3.1   | 0.1275 |
| 11 | 314.0115 | 2463 |     | 1.0   | 0.1275 |
| 12 | 315.0132 | 2471 |     | 0.1   | 0.1275 |



# Compound 6e

D:\IAC2020\...\QEH001196-ZG-689

08/24/20 10:11:07

QEH001196-ZG-689 #10-18 RT: 0.09-0.17 AV: 5 NL: 3.02E9

T: FTMS + p ESI Full ms [100.0000-1000.0000]

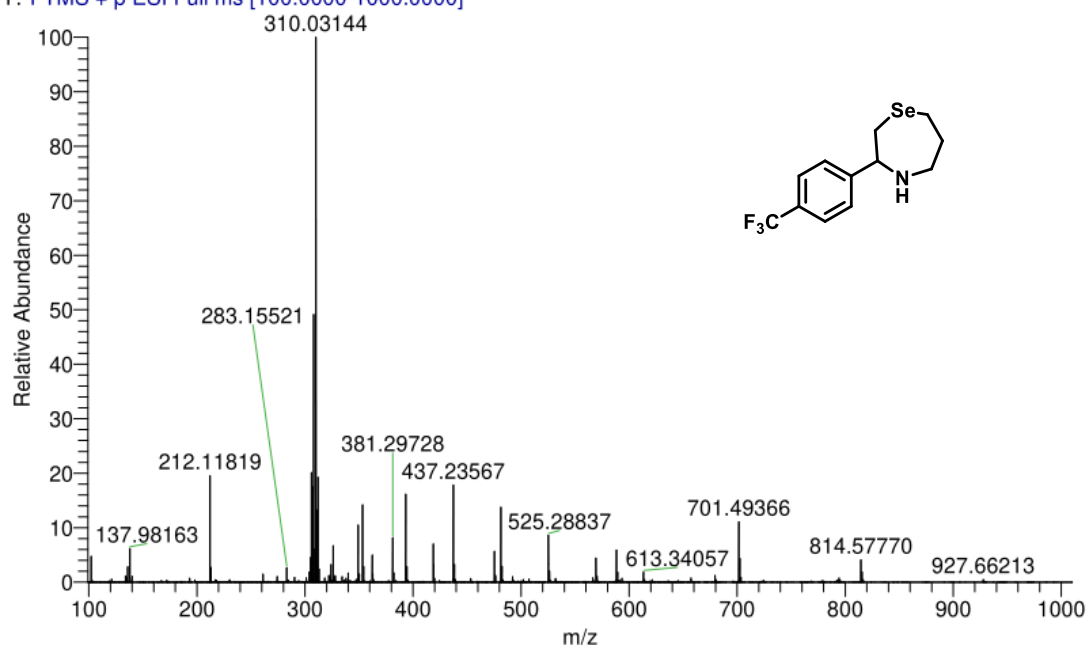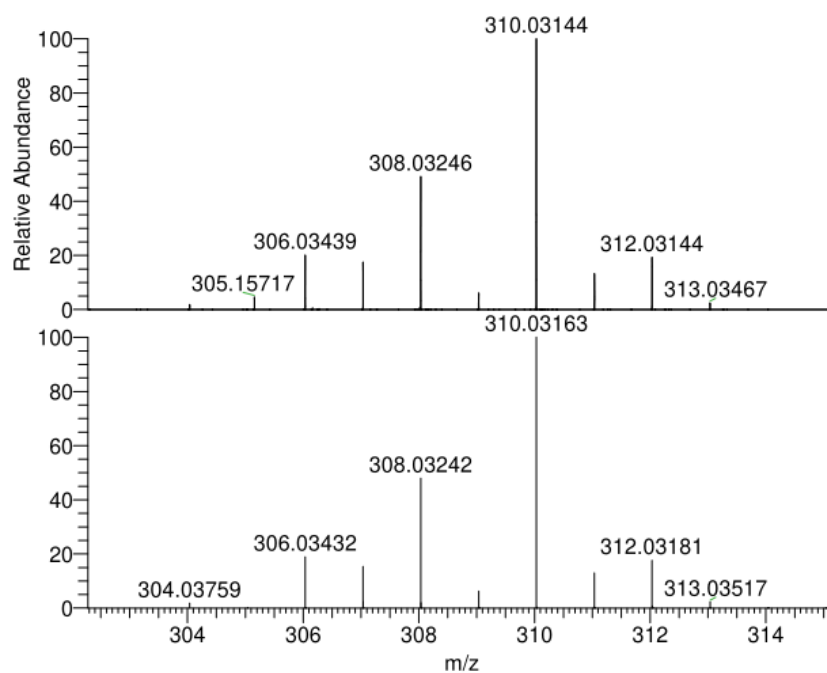

NL:  
3.02E9  
QEH001196-ZG-  
689#10-18 RT:  
0.09-0.17 AV: 5 T:  
FTMS + p ESI Full ms  
[100.0000-1000.0000]

NL:  
4.34E5  
C<sub>12</sub>H<sub>14</sub>F<sub>3</sub>NSe +H:  
C<sub>12</sub>H<sub>15</sub>F<sub>3</sub>N<sub>1</sub>Se<sub>1</sub>  
pa Chrg 1



# Compound 6f

RAJAVEL/ZHOU GUAN

|             |                        |                       |                     |
|-------------|------------------------|-----------------------|---------------------|
| Method:     | 20190603-50_3000-pos.m | Acquisition Date:     | 6/5/2019 6:13:24 PM |
| File Name:  | D:\Data\IAC            | Operator:             | Shuyang Yang / XZ   |
| Source Type | ESI                    | Ion Polarity          | Positive            |
| Focus       | Active                 | Set Capillary         | 3500 V              |
| Scan Begin  | 50 m/z                 | Set End Plate Offset  | -500 V              |
| Scan End    | 3000 m/z               | Set Collision Cell RF | 600.0 Vpp           |
|             |                        | Set Nebulizer         | 0.3 Bar             |
|             |                        | Set Dry Heater        | 180 °C              |
|             |                        | Set Dry Gas           | 4.0 l/min           |
|             |                        | Set Divert Valve      | Source              |

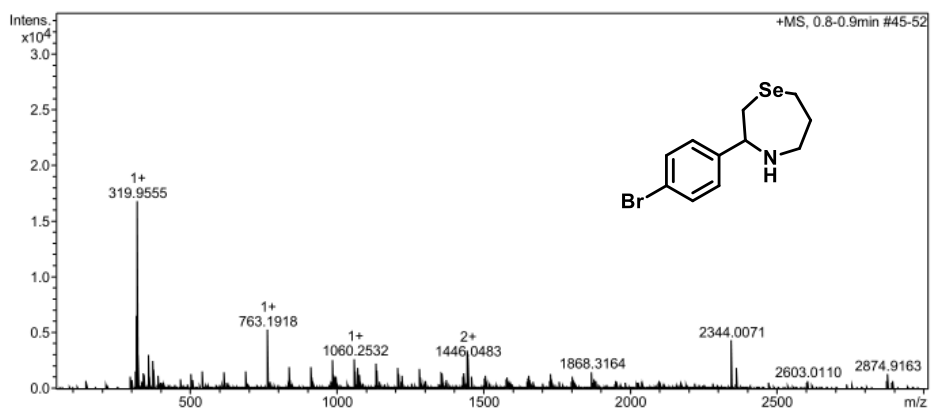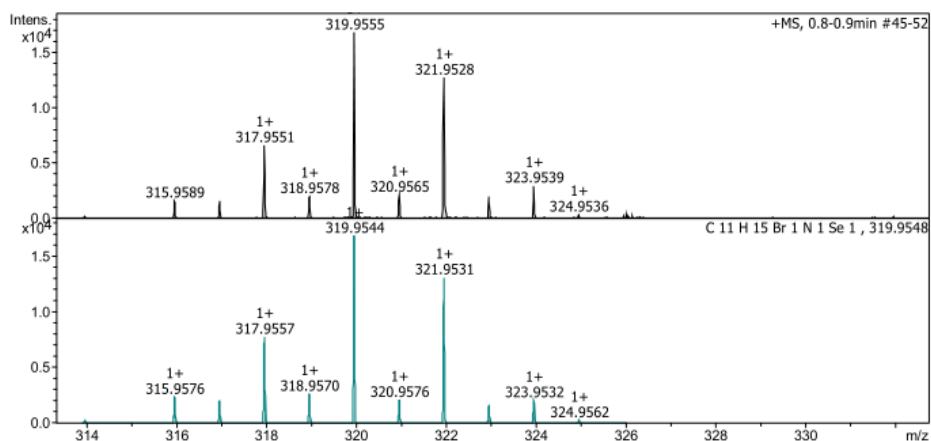



## Evaluation Spectra / Validation Formula:

| Meas. m/z  | # | Ion Formula | m/z        | Adduct | err [mDa] | err [ppm] | mSigma | N-Rule | rdb | e <sup>-</sup> Conf | Score  |
|------------|---|-------------|------------|--------|-----------|-----------|--------|--------|-----|---------------------|--------|
| 319.955514 | 1 | C11H15BrNSe | 319.954445 | M+H    | 1.1       | 3.3       | 33.8   | ok     | 4.5 | even                | 100.00 |

## Calibration Info:

Date: 6/10/2019 4:58:17 PM  
Polarity: Positive  
Calibration spectrum: +MS, 4.5-4.6min #270-272: Scan  
Reference mass list: ESI: Tuning Mix ES-TOF (ESI) (pos)  
Calibration mode: Enhanced Quadratic

| Reference m/z | Resulting m/z | Intensity | Error [ppm] |
|---------------|---------------|-----------|-------------|
| 118.0863      |               |           |             |
| 322.0481      | 322.0484      | 388       | 0.792       |
| 622.0290      | 622.0278      | 12428     | -1.905      |
| 922.0098      | 922.0094      | 27395     | -0.476      |
| 1221.9906     | 1221.9926     | 37577     | 1.622       |
| 1521.9715     | 1521.9736     | 36811     | 1.364       |
| 1821.9523     | 1821.9534     | 23214     | 0.596       |
| 2121.9332     | 2121.9319     | 27239     | -0.570      |
| 2421.9140     | 2421.9034     | 7437      | -4.363      |
| 2721.8948     | 2721.9028     | 1769      | 2.939       |

Standard deviation: 2.819

## Mass List:

| #  | m/z       | Res.  | S/N    | I %   | FWHM   |
|----|-----------|-------|--------|-------|--------|
| 1  | 315.9589  | 11790 | 117.1  | 9.5   | 0.0268 |
| 2  | 316.9580  | 11975 | 116.2  | 9.4   | 0.0265 |
| 3  | 317.9551  | 11513 | 482.8  | 39.2  | 0.0276 |
| 4  | 318.9578  | 9986  | 145.4  | 11.8  | 0.0319 |
| 5  | 319.9555  | 12079 | 1227.8 | 100.0 | 0.0265 |
| 6  | 320.9565  | 11939 | 156.1  | 12.7  | 0.0269 |
| 7  | 321.9528  | 9777  | 926.2  | 75.5  | 0.0329 |
| 8  | 322.9566  | 12510 | 144.3  | 11.8  | 0.0258 |
| 9  | 323.9539  | 13708 | 213.5  | 17.5  | 0.0236 |
| 10 | 360.3243  | 10251 | 207.8  | 18.1  | 0.0352 |
| 11 | 374.3033  | 14672 | 167.5  | 14.9  | 0.0255 |
| 12 | 376.3197  | 13579 | 114.3  | 10.2  | 0.0277 |
| 13 | 541.1190  | 11282 | 80.4   | 9.2   | 0.0480 |
| 14 | 689.1588  | 13227 | 68.4   | 9.5   | 0.0521 |
| 15 | 763.1918  | 28087 | 207.4  | 31.3  | 0.0272 |
| 16 | 763.5628  | 35491 | 80.6   | 12.2  | 0.0215 |
| 17 | 837.1943  | 13685 | 70.5   | 11.5  | 0.0612 |
| 18 | 838.1977  | 14729 | 64.9   | 10.6  | 0.0569 |
| 19 | 911.2155  | 12638 | 67.7   | 11.8  | 0.0721 |
| 20 | 913.2162  | 12435 | 53.5   | 9.4   | 0.0734 |
| 21 | 985.2304  | 15620 | 83.6   | 15.5  | 0.0631 |
| 22 | 986.2341  | 12756 | 69.2   | 12.8  | 0.0773 |
| 23 | 987.2310  | 14663 | 68.2   | 12.6  | 0.0673 |
| 24 | 1059.2513 | 11853 | 62.4   | 12.2  | 0.0894 |
| 25 | 1060.2532 | 16065 | 81.3   | 15.9  | 0.0660 |
| 26 | 1061.2494 | 12662 | 68.7   | 13.4  | 0.0838 |
| 27 | 1062.2517 | 14055 | 47.0   | 9.2   | 0.0756 |
| 28 | 1072.0477 | 41163 | 56.5   | 11.1  | 0.0260 |
| 29 | 1133.2704 | 14990 | 66.8   | 13.5  | 0.0756 |
| 30 | 1134.2701 | 13427 | 65.0   | 13.2  | 0.0845 |
| 31 | 1135.2686 | 13624 | 64.9   | 13.1  | 0.0833 |
| 32 | 1136.2719 | 13727 | 48.5   | 9.8   | 0.0828 |
| 33 | 1207.2857 | 13563 | 47.0   | 9.8   | 0.0890 |
| 34 | 1208.2898 | 14026 | 53.3   | 11.2  | 0.0861 |
| 35 | 1209.2855 | 12199 | 50.9   | 10.7  | 0.0991 |
| 36 | 1283.3102 | 15152 | 50.8   | 11.0  | 0.0847 |
| 37 | 1445.5634 | 34795 | 47.7   | 10.9  | 0.0415 |
| 38 | 1446.0483 | 16329 | 67.7   | 15.5  | 0.0886 |
| 39 | 2344.0071 | 59972 | 148.1  | 25.6  | 0.0391 |
| 40 | 2344.6212 | 23692 | 101.9  | 17.6  | 0.0990 |
| #  | m/z       | Res.  | S/N    | I %   | FWHM   |
| 1  | 313.9607  | 11853 |        | 1.2   | 0.0265 |
| 2  | 314.9641  | 11890 |        | 0.1   | 0.0265 |
| 3  | 315.9576  | 11928 |        | 13.9  | 0.0265 |
| 4  | 316.9585  | 11966 |        | 12.0  | 0.0265 |



RAJAVEL/ZHOU GUAN

---

| #  | m/z      | Res.  | S/N | I %   | FWHM   |
|----|----------|-------|-----|-------|--------|
| 5  | 317.9557 | 12003 |     | 45.9  | 0.0265 |
| 6  | 318.9570 | 12041 |     | 15.7  | 0.0265 |
| 7  | 319.9544 | 12079 |     | 100.0 | 0.0265 |
| 8  | 320.9576 | 12117 |     | 12.3  | 0.0265 |
| 9  | 321.9531 | 12154 |     | 77.8  | 0.0265 |
| 10 | 322.9563 | 12192 |     | 9.6   | 0.0265 |
| 11 | 323.9532 | 12230 |     | 12.0  | 0.0265 |
| 12 | 324.9562 | 12268 |     | 1.4   | 0.0265 |
| 13 | 325.9596 | 12306 |     | 0.1   | 0.0265 |



# Compound 6g

RAJAVEL/ZHOU GUAN

|             |                                                   |                       |                     |
|-------------|---------------------------------------------------|-----------------------|---------------------|
| Method:     | 20190603-50_3000-pos.m                            | Acquisition Date:     | 6/5/2019 6:30:47 PM |
| File Name:  | D:\Data\IAC                                       | Operator:             | Shuyang Yang / XZ   |
| Source Type | TEST\YSY\20190605\ZHOU GUAN-2\23_P1-B-6_01_8991.d |                       |                     |
| Focus       | ESI                                               | Ion Polarity          | Positive            |
| Scan Begin  | Active                                            | Set Capillary         | 3500 V              |
| Scan End    | 50 m/z                                            | Set End Plate Offset  | -500 V              |
|             | 3000 m/z                                          | Set Collision Cell RF | 600.0 Vpp           |
|             |                                                   | Set Nebulizer         | 0.3 Bar             |
|             |                                                   | Set Dry Heater        | 180 °C              |
|             |                                                   | Set Dry Gas           | 4.0 l/min           |
|             |                                                   | Set Divert Valve      | Source              |

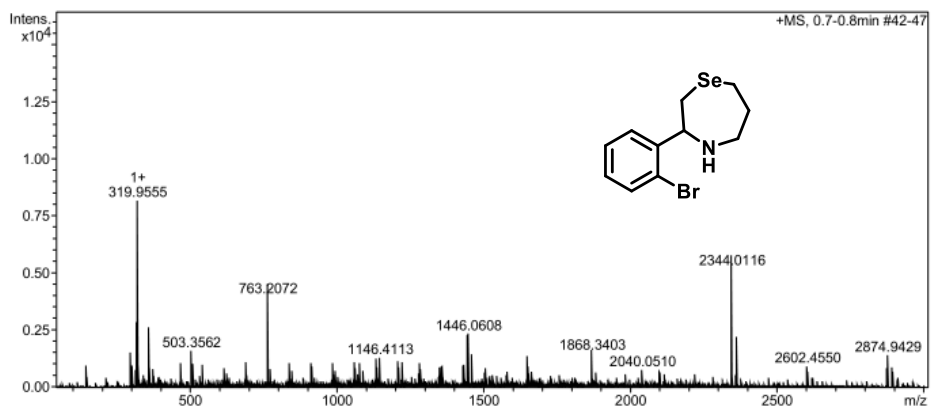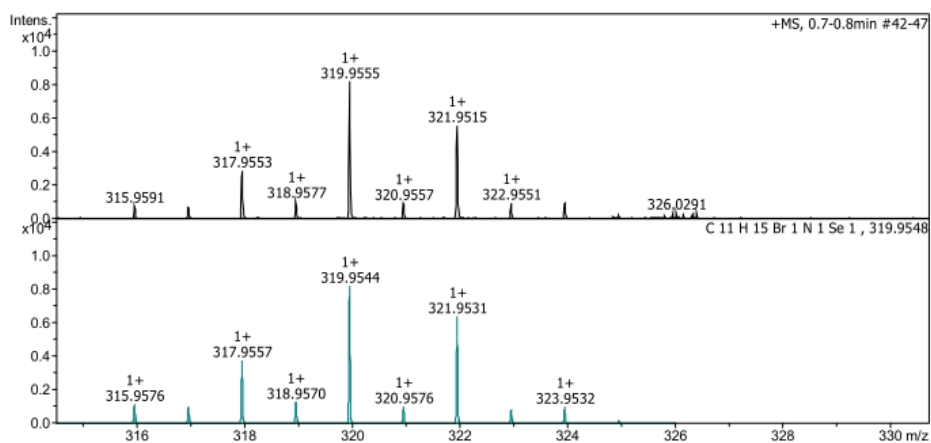



# RAJAVEL/ZHOU GUAN

## Evaluation Spectra / Validation Formula:

| Meas. m/z  | # | Ion Formula | Score  | m/z        | err [mDa] | err [ppm] | mSigma | rdb | e <sup>-</sup> Conf | N-Rule | Adduct |
|------------|---|-------------|--------|------------|-----------|-----------|--------|-----|---------------------|--------|--------|
| 319.955469 | 1 | C11H15BrNSe | 100.00 | 319.954445 | 1.0       | 3.2       | 48.9   | 4.5 | even                | ok     | M+H    |

## Calibration Info:

Date: 6/13/2019 9:57:14 AM  
Polarity: Positive  
Calibration spectrum: +MS, 4.5-4.6min #270-273: Scan  
Reference mass list: ESI: Tuning Mix ES-TOF (ESI) (pos)  
Calibration mode: Enhanced Quadratic

| Reference m/z | Resulting m/z | Intensity | Error [ppm] |
|---------------|---------------|-----------|-------------|
| 118.0863      |               |           |             |
| 322.0481      | 322.0483      | 309       | 0.449       |
| 622.0290      | 622.0284      | 11605     | -0.962      |
| 922.0098      | 922.0093      | 32097     | -0.577      |
| 1221.9906     | 1221.9918     | 39656     | 0.972       |
| 1521.9715     | 1521.9729     | 41962     | 0.955       |
| 1821.9523     | 1821.9532     | 29734     | 0.465       |
| 2121.9332     | 2121.9329     | 36981     | -0.134      |
| 2421.9140     | 2421.9062     | 10898     | -3.196      |
| 2721.8948     | 2721.9004     | 2374      | 2.030       |

Standard deviation: 1.951

## Mass List:

| #  | m/z       | Res.  | S/N   | I %   | FWHM   |
|----|-----------|-------|-------|-------|--------|
| 1  | 296.9497  | 27163 | 98.2  | 14.9  | 0.0109 |
| 2  | 297.1658  | 25148 | 110.1 | 16.7  | 0.0118 |
| 3  | 317.9553  | 11680 | 221.7 | 35.1  | 0.0272 |
| 4  | 318.9577  | 12601 | 81.1  | 12.9  | 0.0253 |
| 5  | 319.9555  | 13308 | 628.4 | 100.0 | 0.0240 |
| 6  | 321.9515  | 10954 | 426.3 | 68.0  | 0.0294 |
| 7  | 360.3236  | 10951 | 186.8 | 32.2  | 0.0329 |
| 8  | 467.1014  | 15303 | 63.6  | 13.2  | 0.0305 |
| 9  | 503.0809  | 27498 | 66.9  | 14.7  | 0.0183 |
| 10 | 503.3562  | 31036 | 89.7  | 19.8  | 0.0162 |
| 11 | 510.9277  | 9240  | 55.8  | 12.4  | 0.0553 |
| 12 | 541.1167  | 11897 | 53.0  | 12.4  | 0.0455 |
| 13 | 689.1572  | 14086 | 46.5  | 13.4  | 0.0489 |
| 14 | 763.2072  | 9748  | 153.3 | 48.6  | 0.0783 |
| 15 | 763.5726  | 13908 | 74.6  | 23.7  | 0.0549 |
| 16 | 837.1921  | 14486 | 38.4  | 13.2  | 0.0578 |
| 17 | 985.2280  | 15186 | 32.6  | 13.1  | 0.0649 |
| 18 | 987.2312  | 13365 | 29.9  | 12.0  | 0.0739 |
| 19 | 1059.2472 | 13343 | 29.4  | 12.4  | 0.0794 |
| 20 | 1060.2488 | 13641 | 31.9  | 13.5  | 0.0777 |
| 21 | 1061.2463 | 11284 | 29.3  | 12.4  | 0.0940 |
| 22 | 1077.7991 | 35614 | 30.8  | 13.1  | 0.0303 |
| 23 | 1133.2658 | 12657 | 29.2  | 12.9  | 0.0895 |
| 24 | 1134.2666 | 12785 | 31.9  | 14.1  | 0.0887 |
| 25 | 1135.2682 | 14698 | 34.8  | 15.4  | 0.0772 |
| 26 | 1146.4113 | 28826 | 36.1  | 16.1  | 0.0398 |
| 27 | 1146.5433 | 20681 | 27.0  | 12.0  | 0.0554 |
| 28 | 1208.2868 | 13100 | 26.9  | 12.4  | 0.0922 |
| 29 | 1209.2782 | 13749 | 30.2  | 13.9  | 0.0880 |
| 30 | 1221.9863 | 38531 | 29.4  | 13.6  | 0.0317 |
| 31 | 1283.3065 | 12676 | 27.6  | 13.1  | 0.1012 |
| 32 | 1431.3429 | 14029 | 24.4  | 12.1  | 0.1020 |
| 33 | 1445.5535 | 11041 | 28.5  | 14.2  | 0.1309 |
| 34 | 1446.0608 | 14807 | 57.8  | 28.8  | 0.0977 |
| 35 | 1458.9245 | 48879 | 35.1  | 17.5  | 0.0298 |
| 36 | 1868.3403 | 21631 | 38.8  | 18.4  | 0.0864 |
| 37 | 2344.0116 | 60747 | 183.5 | 63.6  | 0.0386 |
| 38 | 2344.6421 | 23618 | 101.5 | 35.2  | 0.0993 |
| 39 | 2360.3387 | 69356 | 36.6  | 12.5  | 0.0340 |
| 40 | 2874.9429 | 72965 | 73.1  | 17.2  | 0.0394 |
| #  | m/z       | Res.  | S/N   | I %   | FWHM   |
| 1  | 313.9607  | 13058 |       | 1.2   | 0.0240 |
| 2  | 314.9641  | 13100 |       | 0.1   | 0.0240 |
| 3  | 315.9576  | 13141 |       | 13.9  | 0.0240 |
| 4  | 316.9585  | 13183 |       | 12.0  | 0.0240 |



RAJAVEL/ZHOU GUAN

| #  | m/z      | Res.  | S/N | I %   | FWHM   |
|----|----------|-------|-----|-------|--------|
| 5  | 317.9557 | 13225 |     | 45.9  | 0.0240 |
| 6  | 318.9570 | 13266 |     | 15.7  | 0.0240 |
| 7  | 319.9544 | 13308 |     | 100.0 | 0.0240 |
| 8  | 320.9576 | 13349 |     | 12.3  | 0.0240 |
| 9  | 321.9531 | 13391 |     | 77.8  | 0.0240 |
| 10 | 322.9563 | 13433 |     | 9.6   | 0.0240 |
| 11 | 323.9532 | 13474 |     | 12.0  | 0.0240 |
| 12 | 324.9562 | 13516 |     | 1.4   | 0.0240 |
| 13 | 325.9596 | 13557 |     | 0.1   | 0.0240 |



# Compound 6h

RAJAVEL/ZHOU GUAN

|             |                        |                       |                     |
|-------------|------------------------|-----------------------|---------------------|
| Method:     | 20190603-50_3000-pos.m | Acquisition Date:     | 6/5/2019 6:24:59 PM |
| File Name:  | D:\Data\IAC            | Operator:             | Shuyang Yang / XZ   |
| Source Type | ESI                    | Ion Polarity          | Positive            |
| Focus       | Active                 | Set Capillary         | 3500 V              |
| Scan Begin  | 50 m/z                 | Set End Plate Offset  | -500 V              |
| Scan End    | 3000 m/z               | Set Collision Cell RF | 600.0 Vpp           |
|             |                        | Set Nebulizer         | 0.3 Bar             |
|             |                        | Set Dry Heater        | 180 °C              |
|             |                        | Set Dry Gas           | 4.0 l/min           |
|             |                        | Set Divert Valve      | Source              |

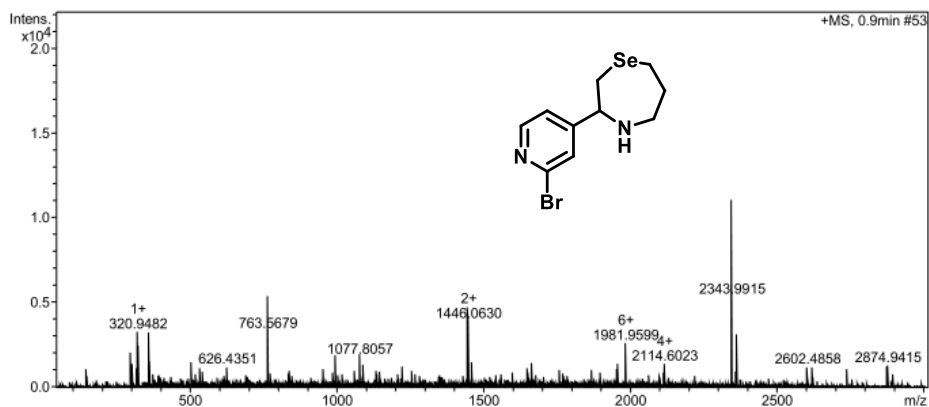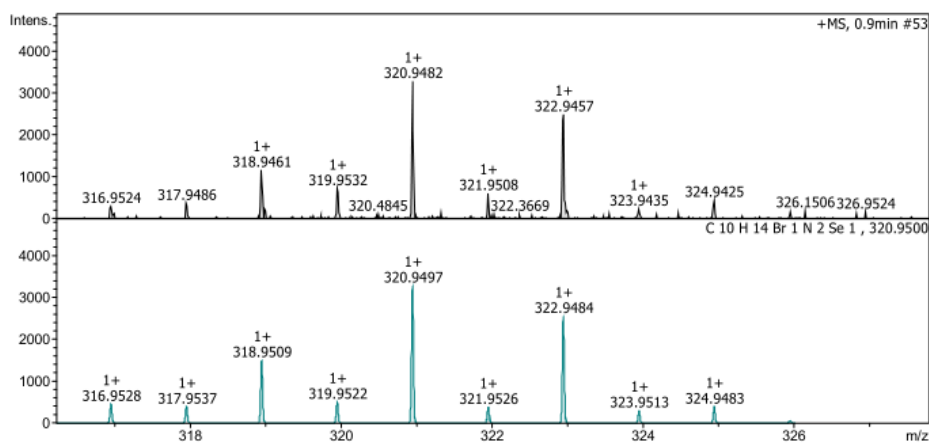



## Evaluation Spectra / Validation Formula:

| Meas. m/z  | # | Ion Formula  | Score  | m/z        | err [mDa] | err [ppm] | mSigma | rdb | e <sup>-</sup> Conf | N-Rule | Adduct |
|------------|---|--------------|--------|------------|-----------|-----------|--------|-----|---------------------|--------|--------|
| 320.948240 | 1 | C10H14BrN2Se | 100.00 | 320.949684 | -1.4      | -4.5      | 47.9   | 4.5 | even                | ok     | M+H    |

## Calibration Info:

Date: 6/13/2019 9:48:30 AM  
Polarity: Positive  
Calibration spectrum: +MS, 4.6-4.7min #271-282: Scan  
Reference mass list: ESI: Tuning Mix ES-TOF (ESI) (pos)  
Calibration mode: Enhanced Quadratic

| Reference m/z | Resulting m/z | Intensity | Error [ppm] |
|---------------|---------------|-----------|-------------|
| 118.0863      |               |           |             |
| 322.0481      |               |           |             |
| 622.0290      | 622.0290      | 15605     | -0.015      |
| 922.0098      | 922.0099      | 40088     | 0.060       |
| 1221.9906     | 1221.9906     | 49863     | -0.056      |
| 1521.9715     | 1521.9714     | 50184     | -0.042      |
| 1821.9523     | 1821.9525     | 34940     | 0.087       |
| 2121.9332     | 2121.9331     | 36912     | -0.034      |
| 2421.9140     |               |           |             |
| 2721.8948     |               |           |             |

Standard deviation: 0.098

## Mass List:

| #  | m/z       | Res.  | S/N  | I %   | FWHM   |
|----|-----------|-------|------|-------|--------|
| 1  | 144.9782  | 17920 | 16.5 | 20.3  | 0.0081 |
| 2  | 296.9681  | 23413 | 21.8 | 38.7  | 0.0127 |
| 3  | 297.1589  | 26220 | 19.7 | 34.9  | 0.0113 |
| 4  | 302.9842  | 11674 | 14.5 | 26.1  | 0.0260 |
| 5  | 318.9461  | 11363 | 11.9 | 21.8  | 0.0281 |
| 6  | 320.9482  | 11052 | 33.6 | 61.5  | 0.0290 |
| 7  | 322.9457  | 12309 | 25.3 | 46.6  | 0.0262 |
| 8  | 360.3233  | 9113  | 31.7 | 60.8  | 0.0395 |
| 9  | 361.3228  | 16861 | 14.9 | 28.7  | 0.0214 |
| 10 | 503.0776  | 19228 | 10.0 | 20.8  | 0.0262 |
| 11 | 534.9576  | 16933 | 10.0 | 21.0  | 0.0316 |
| 12 | 626.4351  | 36527 | 10.6 | 22.5  | 0.0172 |
| 13 | 763.2047  | 8987  | 25.4 | 54.9  | 0.0849 |
| 14 | 763.5679  | 40662 | 28.5 | 61.8  | 0.0188 |
| 15 | 837.0887  | 40381 | 8.6  | 18.8  | 0.0207 |
| 16 | 953.2543  | 47667 | 9.2  | 20.2  | 0.0200 |
| 17 | 994.1803  | 16013 | 13.9 | 30.7  | 0.0621 |
| 18 | 1077.3841 | 37295 | 9.6  | 21.3  | 0.0289 |
| 19 | 1077.8057 | 16500 | 15.1 | 33.4  | 0.0653 |
| 20 | 1221.9372 | 45526 | 9.0  | 20.1  | 0.0268 |
| 21 | 1446.0630 | 17950 | 32.4 | 72.9  | 0.0806 |
| 22 | 1458.9170 | 40904 | 12.6 | 28.4  | 0.0357 |
| 23 | 1649.9399 | 54624 | 9.7  | 21.8  | 0.0302 |
| 24 | 1664.1931 | 55315 | 12.1 | 27.2  | 0.0301 |
| 25 | 1867.7427 | 47631 | 8.9  | 19.8  | 0.0392 |
| 26 | 1954.7347 | 68771 | 9.2  | 20.2  | 0.0284 |
| 27 | 1954.9265 | 66616 | 11.7 | 25.8  | 0.0293 |
| 28 | 1981.7905 | 67177 | 19.8 | 43.2  | 0.0295 |
| 29 | 1981.9599 | 64380 | 22.4 | 48.9  | 0.0308 |
| 30 | 2114.6023 | 67135 | 12.0 | 25.7  | 0.0315 |
| 31 | 2343.9915 | 20429 | 48.5 | 100.0 | 0.1147 |
| 32 | 2344.6448 | 58946 | 24.5 | 50.4  | 0.0398 |
| 33 | 2360.1206 | 73498 | 10.7 | 21.8  | 0.0321 |
| 34 | 2360.3316 | 74028 | 18.2 | 37.3  | 0.0319 |
| 35 | 2360.8082 | 63150 | 15.9 | 32.4  | 0.0374 |
| 36 | 2361.0185 | 60225 | 28.1 | 57.3  | 0.0392 |
| 37 | 2602.4858 | 79874 | 12.4 | 22.7  | 0.0326 |
| 38 | 2620.2848 | 64258 | 12.3 | 22.2  | 0.0408 |
| 39 | 2736.6694 | 73736 | 11.7 | 20.7  | 0.0371 |
| 40 | 2874.9415 | 80495 | 13.7 | 24.1  | 0.0357 |

| # | m/z      | Res.  | S/N | I %  | FWHM   |
|---|----------|-------|-----|------|--------|
| 1 | 314.9560 | 10846 |     | 1.2  | 0.0290 |
| 2 | 315.9593 | 10880 |     | 0.1  | 0.0290 |
| 3 | 316.9528 | 10914 |     | 13.9 | 0.0290 |
| 4 | 317.9537 | 10949 |     | 12.0 | 0.0290 |



RAJAVEL/ZHOU GUAN

---

| #  | m/z      | Res.  | S/N | I %   | FWHM   |
|----|----------|-------|-----|-------|--------|
| 5  | 318.9509 | 10983 |     | 45.9  | 0.0290 |
| 6  | 319.9522 | 11018 |     | 15.3  | 0.0290 |
| 7  | 320.9497 | 11052 |     | 100.0 | 0.0290 |
| 8  | 321.9526 | 11086 |     | 11.6  | 0.0290 |
| 9  | 322.9484 | 11121 |     | 77.8  | 0.0290 |
| 10 | 323.9513 | 11155 |     | 9.0   | 0.0290 |
| 11 | 324.9483 | 11190 |     | 12.0  | 0.0290 |
| 12 | 325.9511 | 11224 |     | 1.4   | 0.0290 |



# Compound 6i

RAJAVEL/ZHOU GUAN

|             |                                                   |                       |                      |
|-------------|---------------------------------------------------|-----------------------|----------------------|
| Method:     | 20190603-50_3000-pos.m                            | Acquisition Date:     | 6/6/2019 11:49:44 AM |
| File Name:  | D:\Data\IAC                                       | Operator:             | Shuyang Yang / XZ    |
| Source Type | TEST\YSY\20190605\ZHOU GUAN-2\20_P1-C-5_01_9023.d |                       |                      |
| Focus       | ESI                                               | Ion Polarity          | Positive             |
| Scan Begin  | 50 m/z                                            | Set Nebulizer         | 0.3 Bar              |
| Scan End    | 3000 m/z                                          | Set Dry Heater        | 180 °C               |
|             |                                                   | Set End Plate Offset  | -500 V               |
|             |                                                   | Set Collision Cell RF | 600.0 Vpp            |
|             |                                                   | Set Dry Gas           | 4.0 l/min            |
|             |                                                   | Set Divert Valve      | Source               |

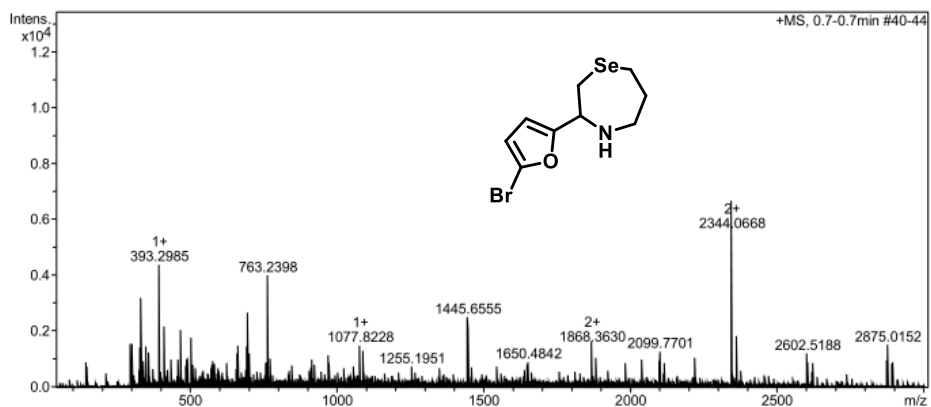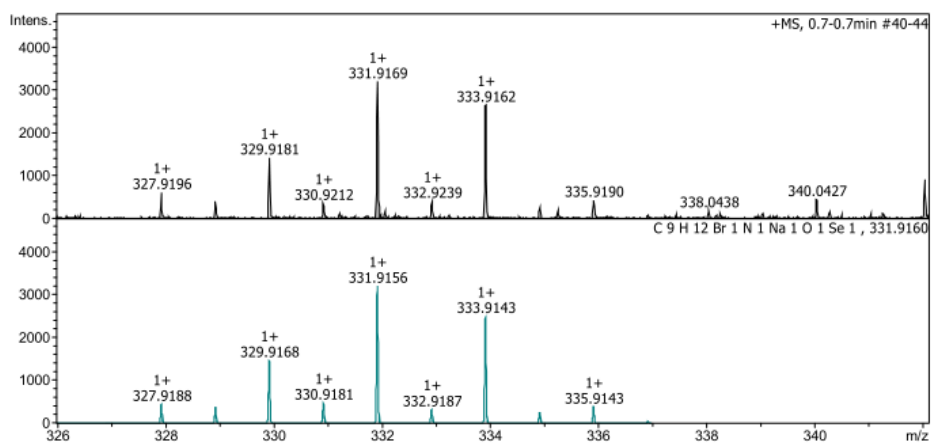



## Evaluation Spectra / Validation Formula:

| Meas. m/z  | # | Ion Formula   | m/z        | Adduct | err [mDa] | err [ppm] | mSigma | N-Rule | rdb | e <sup>-</sup> Conf | Score  |
|------------|---|---------------|------------|--------|-----------|-----------|--------|--------|-----|---------------------|--------|
| 331.916950 | 1 | C9H12BrNNaOSe | 331.915640 | M+Na   | 1.3       | 3.9       | 27.3   | ok     | 3.5 | even                | 100.00 |

## Calibration Info:

Date: 6/10/2019 5:13:42 PM  
Polarity: Positive  
Calibration spectrum: +MS, 4.6-4.6min #271-272: Scan  
Reference mass list: ESI: Tuning Mix ES-TOF (ESI) (pos)  
Calibration mode: Enhanced Quadratic

| Reference m/z | Resulting m/z | Intensity | Error [ppm] |
|---------------|---------------|-----------|-------------|
| 118.0863      |               |           |             |
| 322.0481      |               |           |             |
| 622.0290      | 622.0290      | 16850     | 0.120       |
| 922.0098      | 922.0094      | 44814     | -0.473      |
| 1221.9906     | 1221.9910     | 49752     | 0.287       |
| 1521.9715     | 1521.9728     | 50592     | 0.882       |
| 1821.9523     | 1821.9502     | 32056     | -1.135      |
| 2121.9332     | 2121.9328     | 42406     | -0.172      |
| 2421.9140     | 2421.9159     | 10598     | 0.785       |
| 2721.8948     | 2721.8940     | 2680      | -0.294      |

Standard deviation: 0.915

## Mass List:

| #  | m/z       | Res.  | S/N   | I %   | FWHM   |
|----|-----------|-------|-------|-------|--------|
| 1  | 296.9586  | 27163 | 57.6  | 22.2  | 0.0109 |
| 2  | 297.1739  | 25563 | 69.4  | 26.8  | 0.0116 |
| 3  | 329.9181  | 11213 | 60.2  | 25.6  | 0.0294 |
| 4  | 331.9169  | 11464 | 134.1 | 57.5  | 0.0290 |
| 5  | 333.9162  | 11870 | 110.7 | 47.7  | 0.0281 |
| 6  | 349.2367  | 13371 | 59.1  | 26.5  | 0.0261 |
| 7  | 360.3236  | 11640 | 48.5  | 22.3  | 0.0310 |
| 8  | 393.2985  | 11227 | 158.8 | 78.8  | 0.0350 |
| 9  | 394.3039  | 11609 | 41.5  | 20.7  | 0.0340 |
| 10 | 413.2658  | 11588 | 75.5  | 39.0  | 0.0357 |
| 11 | 468.4231  | 11136 | 62.8  | 36.7  | 0.0421 |
| 12 | 490.9180  | 11183 | 31.3  | 19.2  | 0.0439 |
| 13 | 503.3692  | 32740 | 50.3  | 31.9  | 0.0154 |
| 14 | 660.9582  | 12460 | 27.6  | 21.9  | 0.0530 |
| 15 | 662.9624  | 13239 | 33.8  | 26.9  | 0.0501 |
| 16 | 664.9634  | 11915 | 25.2  | 20.1  | 0.0558 |
| 17 | 692.8550  | 12572 | 32.1  | 26.6  | 0.0551 |
| 18 | 694.8537  | 13365 | 54.5  | 45.1  | 0.0520 |
| 19 | 696.8503  | 14458 | 57.6  | 47.8  | 0.0482 |
| 20 | 698.8352  | 5670  | 22.2  | 18.5  | 0.1233 |
| 21 | 702.7949  | 31985 | 22.5  | 18.8  | 0.0220 |
| 22 | 763.2398  | 33451 | 81.7  | 71.9  | 0.0228 |
| 23 | 763.5887  | 13315 | 46.3  | 40.7  | 0.0573 |
| 24 | 972.3713  | 13680 | 20.7  | 20.6  | 0.0711 |
| 25 | 1077.8228 | 15871 | 26.4  | 27.2  | 0.0679 |
| 26 | 1088.9322 | 35884 | 22.9  | 23.6  | 0.0303 |
| 27 | 1445.6555 | 47335 | 43.6  | 45.3  | 0.0305 |
| 28 | 1446.0834 | 48381 | 36.8  | 38.2  | 0.0299 |
| 29 | 1867.8326 | 31746 | 29.3  | 26.6  | 0.0588 |
| 30 | 1868.3630 | 44153 | 30.0  | 27.3  | 0.0423 |
| 31 | 1883.0024 | 52836 | 20.9  | 18.8  | 0.0356 |
| 32 | 2040.1057 | 66206 | 22.2  | 18.2  | 0.0308 |
| 33 | 2099.7701 | 52335 | 29.5  | 23.2  | 0.0401 |
| 34 | 2219.9549 | 58480 | 26.1  | 18.8  | 0.0380 |
| 35 | 2344.0668 | 59719 | 151.9 | 100.0 | 0.0393 |
| 36 | 2344.6920 | 23839 | 100.4 | 66.1  | 0.0984 |
| 37 | 2360.4062 | 68823 | 29.8  | 19.4  | 0.0343 |
| 38 | 2361.0554 | 46325 | 50.7  | 33.0  | 0.0510 |
| 39 | 2602.5188 | 65747 | 40.4  | 21.6  | 0.0396 |
| 40 | 2875.0152 | 73775 | 59.6  | 27.4  | 0.0390 |

| # | m/z      | Res.  | S/N | I %  | FWHM   |
|---|----------|-------|-----|------|--------|
| 1 | 325.9219 | 11257 |     | 1.2  | 0.0290 |
| 2 | 326.9253 | 11292 |     | 0.1  | 0.0290 |
| 3 | 327.9188 | 11326 |     | 13.9 | 0.0290 |
| 4 | 328.9197 | 11361 |     | 11.8 | 0.0290 |



RAJAVEL/ZHOU GUAN

---

| #  | m/z      | Res.  | S/N | I %   | FWHM   |
|----|----------|-------|-----|-------|--------|
| 5  | 329.9168 | 11395 |     | 45.8  | 0.0290 |
| 6  | 330.9181 | 11430 |     | 14.7  | 0.0290 |
| 7  | 331.9156 | 11464 |     | 100.0 | 0.0290 |
| 8  | 332.9187 | 11499 |     | 10.2  | 0.0290 |
| 9  | 333.9143 | 11533 |     | 78.0  | 0.0290 |
| 10 | 334.9174 | 11568 |     | 7.9   | 0.0290 |
| 11 | 335.9143 | 11602 |     | 12.0  | 0.0290 |
| 12 | 336.9175 | 11637 |     | 1.2   | 0.0290 |



# Compound 7a

D:\IAC2020\...\20200817ZG\QEH001164-ZG-6

08/17/20 18:05:07

QEH001164-ZG-6 #8-33 RT: 0.07-0.30 AV: 13 NL: 2.34E9  
T: FTMS + p ESI Full ms [100.0000-1000.0000]

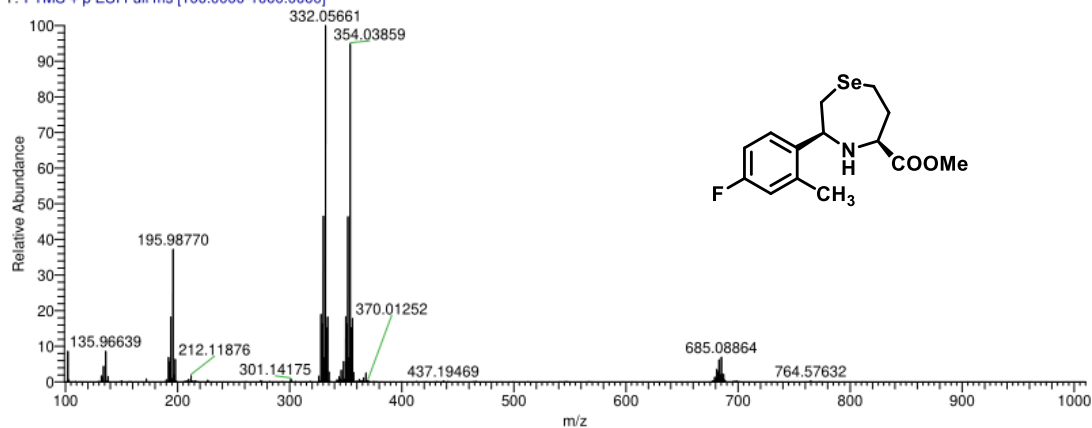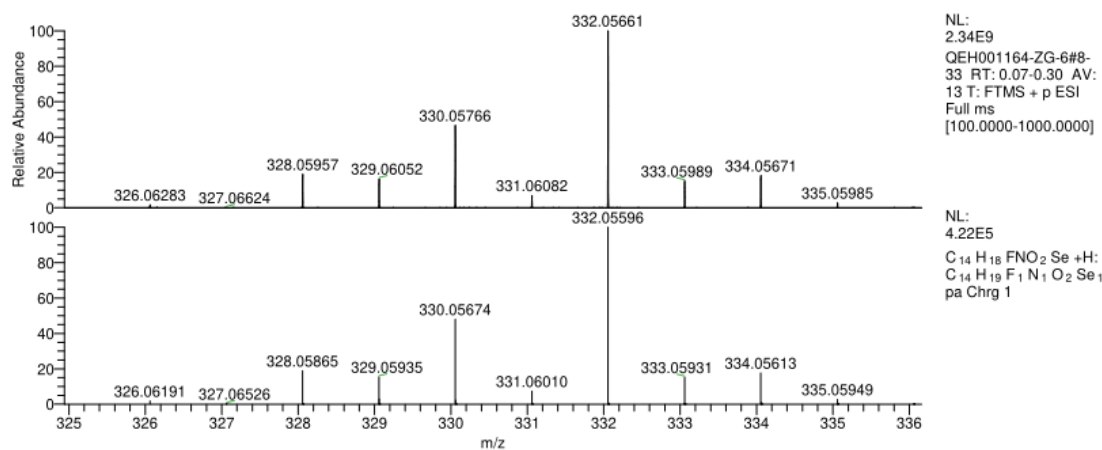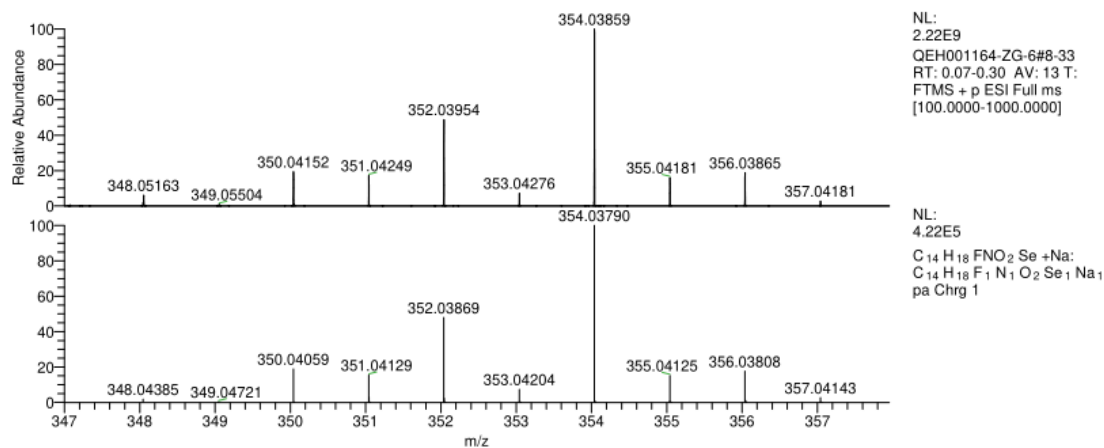



# Compound 7b

D:\IAC2020\...\QEH001186-ZG-17

08/18/20 15:10:05

QEH001186-ZG-17 #10-37 RT: 0.09-0.34 AV: 14 NL: 1.94E9

T: FTMS + p ESI Full ms [100.0000-1000.0000]

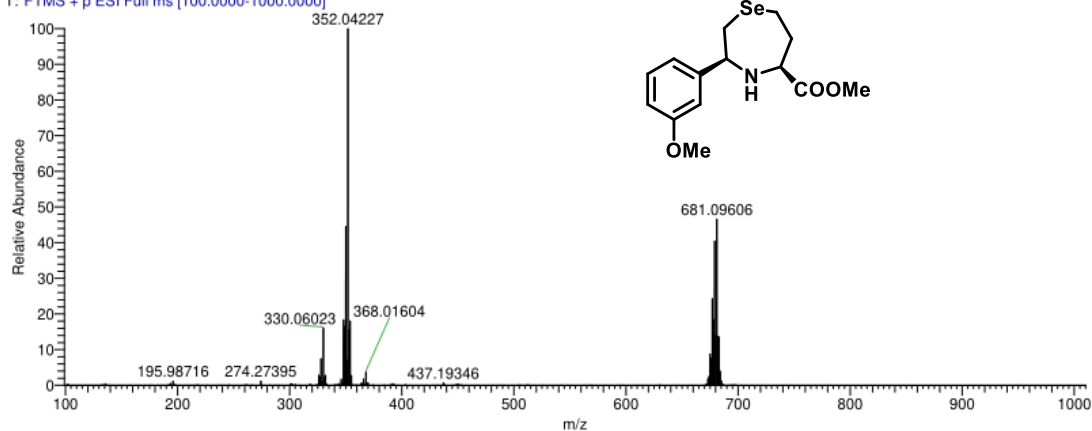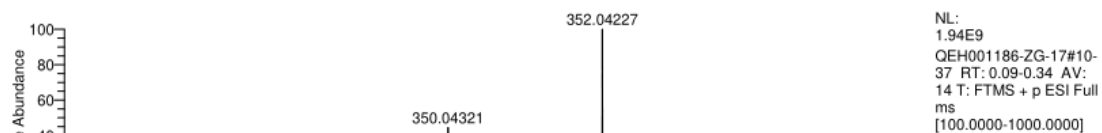

NL:  
1.94E9  
QEH001186-ZG-17#10-  
37 RT: 0.09-0.34 AV:  
14 T: FTMS + p ESI Full  
ms  
[100.0000-1000.0000]

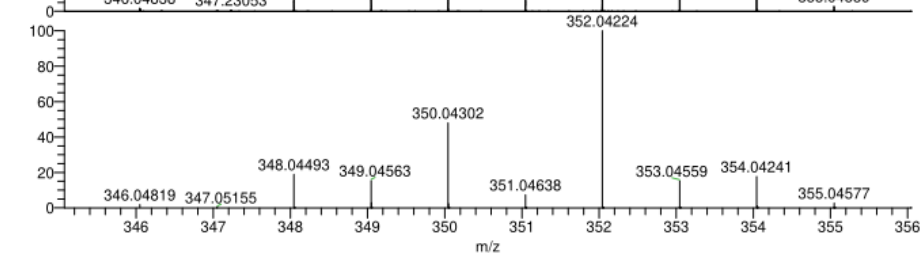

NL:  
4.21E5  
C<sub>14</sub>H<sub>19</sub>NO<sub>3</sub>Se +Na:  
C<sub>14</sub>H<sub>19</sub>N<sub>1</sub>O<sub>3</sub>Se<sub>1</sub>Na<sub>1</sub>  
pa Chrg 1

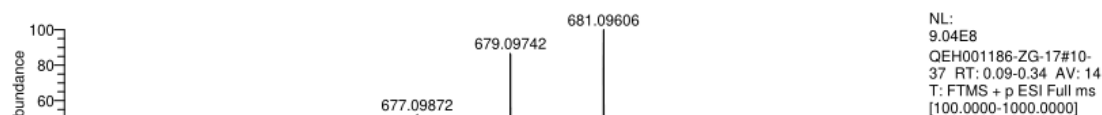

NL:  
9.04E8  
QEH001186-ZG-17#10-  
37 RT: 0.09-0.34 AV: 14  
T: FTMS + p ESI Full ms  
[100.0000-1000.0000]

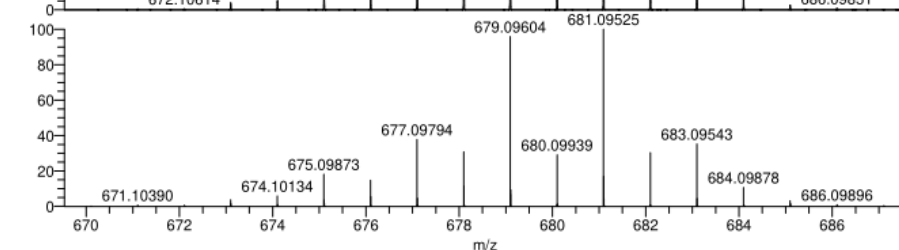

NL:  
1.77E5  
(C<sub>14</sub>H<sub>19</sub>NO<sub>3</sub>Se)<sub>2</sub>+Na:  
Se<sub>2</sub>O<sub>6</sub>N<sub>2</sub>H<sub>38</sub>C<sub>28</sub>Na<sub>1</sub>  
pa Chrg 1



# Compound 7c

D:\IAC2020\...\20200817ZG\QEH001164-ZG-8

08/17/20 18:16:43

QEH001164-ZG-8 #8-24 RT: 0.07-0.22 AV: 9 NL: 1.53E9

T: FTMS + p ESI Full ms [100.0000-1000.0000]

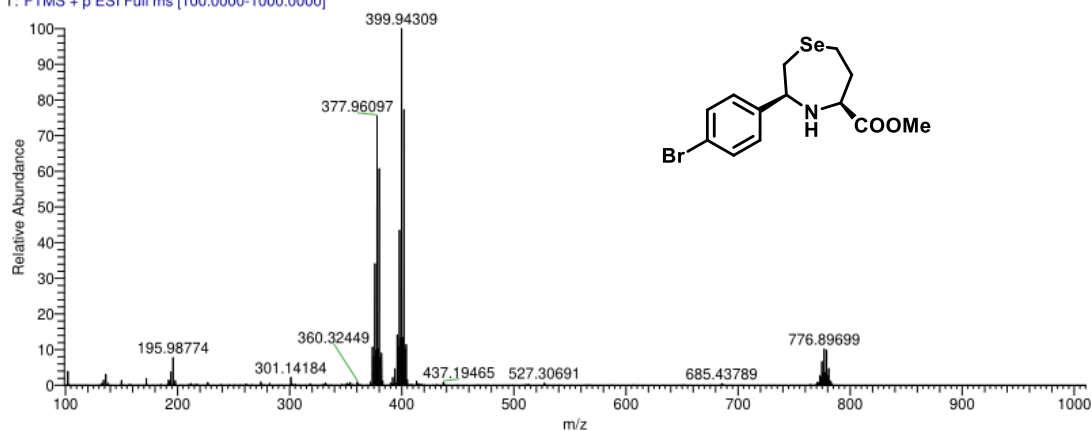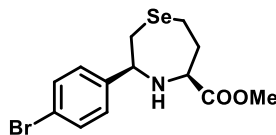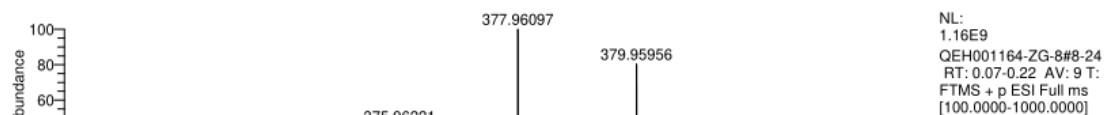

NL:  
1.16E9  
QEH001164-ZG-8#8-24  
RT: 0.07-0.22 AV: 9 T:  
FTMS + p ESI Full ms  
[100.0000-1000.0000]

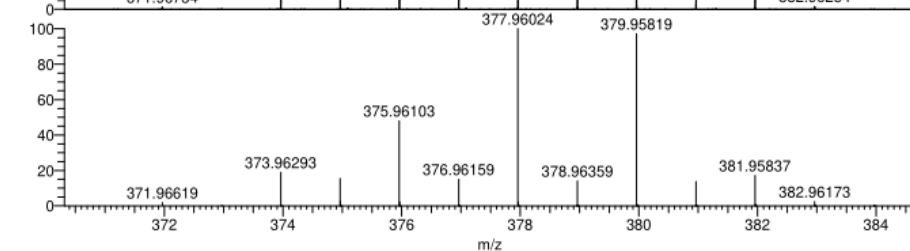

NL:  
2.16E5  
C<sub>13</sub> H<sub>16</sub> BrNO<sub>2</sub> Se +H:  
C<sub>13</sub> H<sub>17</sub> Br<sub>1</sub> N<sub>1</sub> O<sub>2</sub> Se<sub>1</sub>  
pa Chrg 1

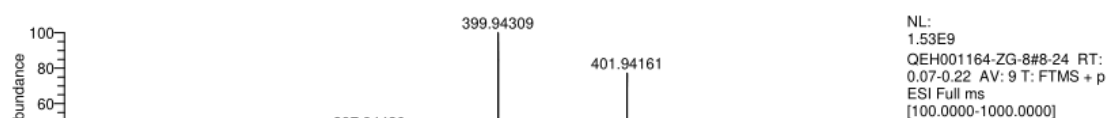

NL:  
1.53E9  
QEH001164-ZG-8#8-24 RT:  
0.07-0.22 AV: 9 T: FTMS + p  
ESI Full ms  
[100.0000-1000.0000]

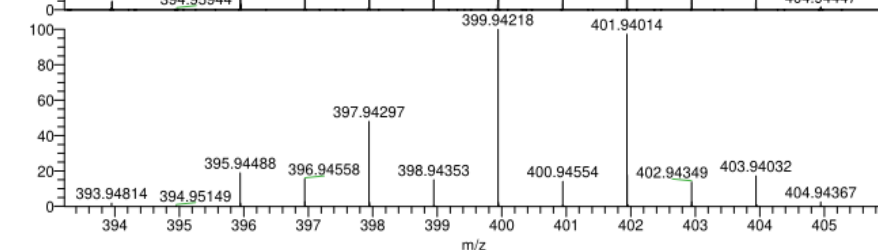

NL:  
2.16E5  
C<sub>13</sub> H<sub>16</sub> BrNO<sub>2</sub> Se +Na:  
C<sub>13</sub> H<sub>16</sub> Br<sub>1</sub> N<sub>1</sub> O<sub>2</sub> Se<sub>1</sub> Na<sub>1</sub>  
pa Chrg 1



# Compound 7d

D:\IAC2020\...\20200817ZG\QEH001164-ZG-7

08/17/20 18:10:57

QEH001164-ZG-7 #12-28 RT: 0.11-0.26 AV: 9 NL: 6.04E8

T: FTMS + p ESI Full ms [100.0000-1000.0000]

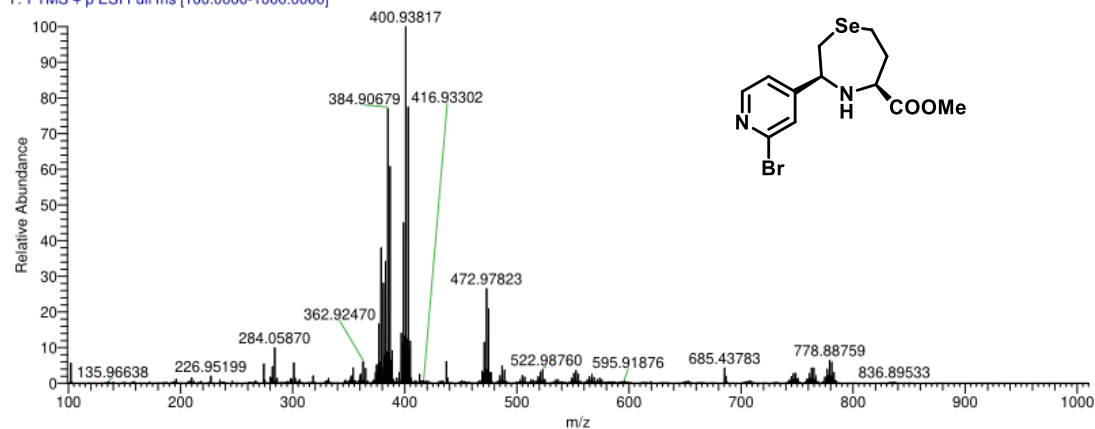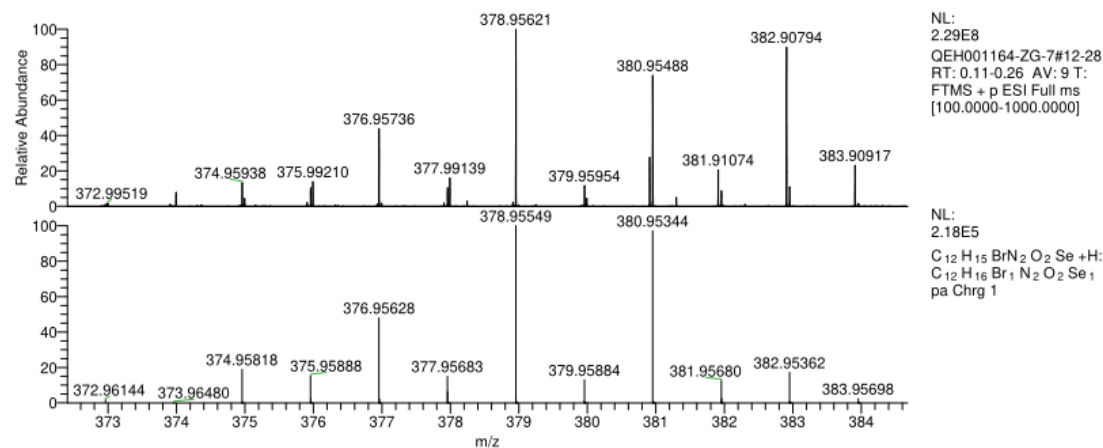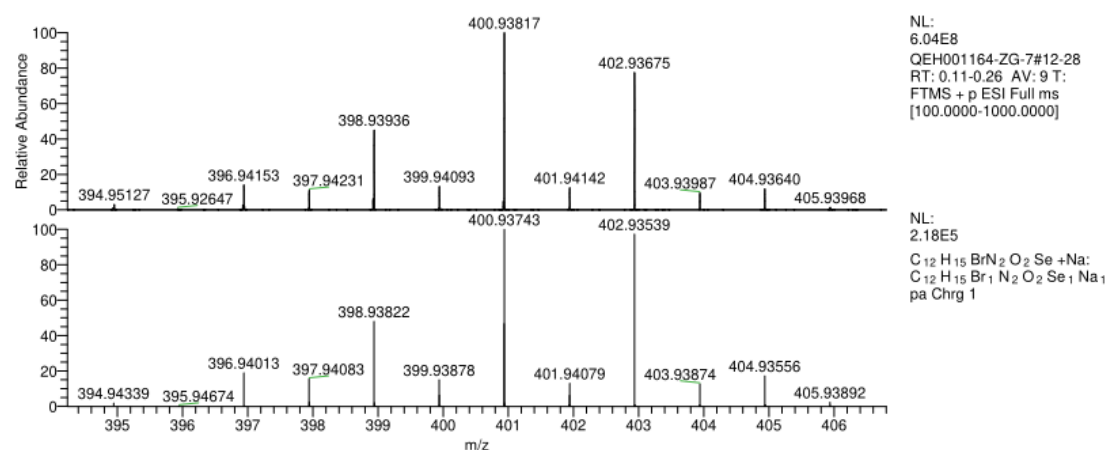



# Compound 8a

RAJAVEL/ZHOU GUAN

|             |                        |                       |                     |
|-------------|------------------------|-----------------------|---------------------|
| Method:     | 20190603-50_3000-pos.m | Acquisition Date:     | 6/5/2019 6:42:22 PM |
| File Name:  | D:\Data\IAC            | Operator:             | Shuyang Yang / XZ   |
| Source Type | ESI                    | Ion Polarity          | Positive            |
| Focus       | Active                 | Set Capillary         | 3500 V              |
| Scan Begin  | 50 m/z                 | Set End Plate Offset  | -500 V              |
| Scan End    | 3000 m/z               | Set Collision Cell RF | 600.0 Vpp           |
|             |                        | Set Nebulizer         | 0.3 Bar             |
|             |                        | Set Dry Heater        | 180 °C              |
|             |                        | Set Dry Gas           | 4.0 l/min           |
|             |                        | Set Divert Valve      | Source              |

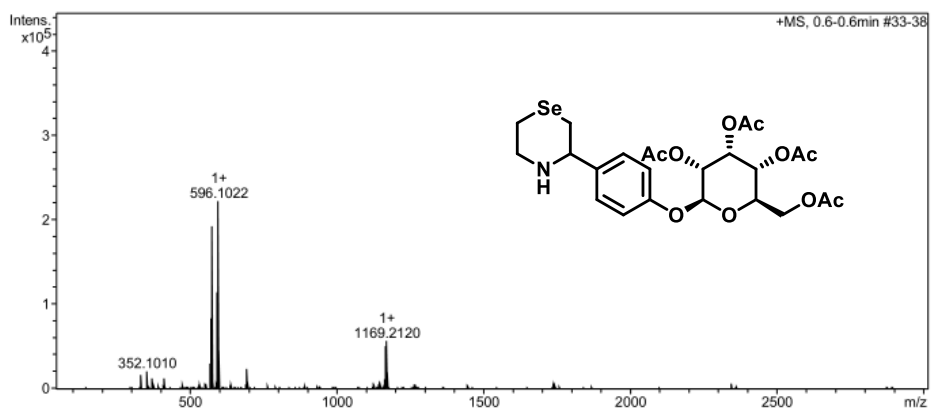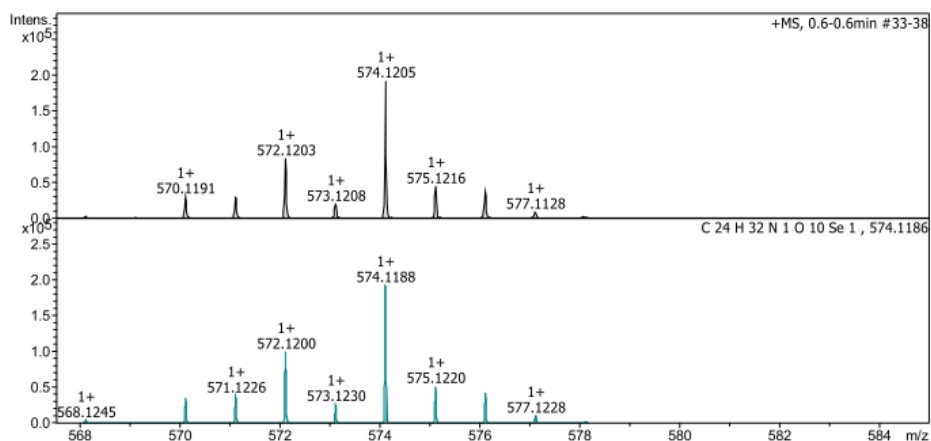



# RAJAVEL/ZHOU GUAN

## Evaluation Spectra / Validation Formula:

| Meas. m/z  | # | Ion Formula  | Score | m/z        | err [mDa] | err [ppm] | mSigma | rdb | e <sup>-</sup> Conf | N-Rule | Adduct |
|------------|---|--------------|-------|------------|-----------|-----------|--------|-----|---------------------|--------|--------|
| 574.120457 | 1 | C24H32NO10Se | 52.95 | 574.118782 | 1.7       | 2.9       | 33.2   | 9.5 | even                | ok     | M+H    |

## Calibration Info:

Date: 6/13/2019 10:00:14 AM  
Polarity: Positive  
Calibration spectrum: +MS, 4.6-4.7min #271-277: Scan  
Reference mass list: ESI: Tuning Mix ES-TOF (ESI) (pos)  
Calibration mode: Enhanced Quadratic

| Reference m/z | Resulting m/z | Intensity | Error [ppm] |
|---------------|---------------|-----------|-------------|
| 118.0863      |               |           |             |
| 322.0481      | 322.0483      | 465       | 0.442       |
| 622.0290      | 622.0285      | 19355     | -0.786      |
| 922.0098      | 922.0090      | 49678     | -0.916      |
| 1221.9906     | 1221.9916     | 60459     | 0.811       |
| 1521.9715     | 1521.9733     | 68105     | 1.211       |
| 1821.9523     | 1821.9542     | 48137     | 1.027       |
| 2121.9332     | 2121.9329     | 51997     | -0.140      |
| 2421.9140     | 2421.9037     | 12710     | -4.243      |
| 2721.8948     | 2721.9019     | 2839      | 2.593       |

Standard deviation: 2.509

## Mass List:

| #  | m/z       | Res.  | S/N    | I %   | FWHM   |
|----|-----------|-------|--------|-------|--------|
| 1  | 331.1026  | 13675 | 559.1  | 7.4   | 0.0242 |
| 2  | 352.1010  | 13363 | 651.5  | 9.3   | 0.0263 |
| 3  | 370.1107  | 12350 | 379.5  | 5.7   | 0.0300 |
| 4  | 412.1210  | 13132 | 350.7  | 5.8   | 0.0314 |
| 5  | 554.0866  | 14024 | 141.3  | 3.1   | 0.0395 |
| 6  | 570.1191  | 14794 | 607.0  | 13.7  | 0.0385 |
| 7  | 571.1213  | 14217 | 588.4  | 13.3  | 0.0402 |
| 8  | 572.1203  | 16262 | 1674.2 | 37.9  | 0.0352 |
| 9  | 573.1208  | 12869 | 402.5  | 9.1   | 0.0445 |
| 10 | 574.1205  | 21669 | 3822.1 | 86.6  | 0.0265 |
| 11 | 575.1216  | 15305 | 895.6  | 20.3  | 0.0376 |
| 12 | 576.1145  | 13958 | 751.3  | 17.1  | 0.0413 |
| 13 | 577.1128  | 11705 | 174.4  | 4.0   | 0.0493 |
| 14 | 592.1025  | 15276 | 821.8  | 19.1  | 0.0388 |
| 15 | 593.1030  | 14387 | 812.2  | 18.9  | 0.0412 |
| 16 | 594.1027  | 16291 | 2208.3 | 51.5  | 0.0365 |
| 17 | 595.1033  | 13987 | 587.8  | 13.7  | 0.0425 |
| 18 | 596.1022  | 17246 | 4282.3 | 100.0 | 0.0346 |
| 19 | 597.1027  | 14994 | 1151.7 | 26.9  | 0.0398 |
| 20 | 598.1003  | 13946 | 872.1  | 20.4  | 0.0429 |
| 21 | 599.1013  | 11964 | 215.2  | 5.0   | 0.0501 |
| 22 | 691.1022  | 12983 | 96.6   | 2.6   | 0.0532 |
| 23 | 692.0980  | 13199 | 227.0  | 6.1   | 0.0524 |
| 24 | 694.0979  | 12512 | 402.7  | 10.9  | 0.0555 |
| 25 | 695.0980  | 14369 | 146.4  | 4.0   | 0.0484 |
| 26 | 696.0973  | 13771 | 122.3  | 3.3   | 0.0505 |
| 27 | 1145.2275 | 14221 | 111.2  | 3.9   | 0.0805 |
| 28 | 1147.2254 | 13353 | 107.7  | 3.7   | 0.0859 |
| 29 | 1163.2097 | 14279 | 146.7  | 5.1   | 0.0815 |
| 30 | 1164.2131 | 13170 | 137.0  | 4.8   | 0.0884 |
| 31 | 1165.2132 | 15596 | 359.4  | 12.5  | 0.0747 |
| 32 | 1166.2104 | 15494 | 339.0  | 11.8  | 0.0753 |
| 33 | 1167.2124 | 16729 | 648.3  | 22.6  | 0.0698 |
| 34 | 1168.2131 | 15713 | 361.0  | 12.6  | 0.0743 |
| 35 | 1169.2120 | 18178 | 732.5  | 25.5  | 0.0643 |
| 36 | 1170.2128 | 15165 | 331.4  | 11.6  | 0.0772 |
| 37 | 1171.2103 | 13272 | 262.1  | 9.1   | 0.0882 |
| 38 | 1172.2076 | 14288 | 133.0  | 4.6   | 0.0820 |
| 39 | 1265.2086 | 13567 | 71.7   | 2.5   | 0.0933 |
| 40 | 1267.1989 | 12575 | 74.9   | 2.6   | 0.1008 |
| #  | m/z       | Res.  | S/N    | I %   | FWHM   |
| 1  | 568.1245  | 21442 |        | 1.7   | 0.0265 |
| 2  | 569.1279  | 21480 |        | 0.5   | 0.0265 |
| 3  | 570.1213  | 21518 |        | 18.5  | 0.0265 |
| 4  | 571.1226  | 21555 |        | 19.9  | 0.0265 |



RAJAVEL/ZHOU GUAN

---

| #  | m/z      | Res.  | S/N | I %   | FWHM   |
|----|----------|-------|-----|-------|--------|
| 5  | 572.1200 | 21593 |     | 51.7  | 0.0265 |
| 6  | 573.1230 | 21631 |     | 13.6  | 0.0265 |
| 7  | 574.1188 | 21669 |     | 100.0 | 0.0265 |
| 8  | 575.1220 | 21706 |     | 26.7  | 0.0265 |
| 9  | 576.1201 | 21744 |     | 22.6  | 0.0265 |
| 10 | 577.1228 | 21782 |     | 5.5   | 0.0265 |
| 11 | 578.1245 | 21820 |     | 1.0   | 0.0265 |



# Compound 8b

RAJAVEL/ZHOU GUAN

|             |                        |                       |                     |
|-------------|------------------------|-----------------------|---------------------|
| Method:     | 20190603-50_3000-pos.m | Acquisition Date:     | 6/5/2019 6:53:52 PM |
| File Name:  | D:\Data\IAC            | Operator:             | Shuyang Yang / XZ   |
| Source Type | ESI                    | Ion Polarity          | Positive            |
| Focus       | Active                 | Set Capillary         | 3500 V              |
| Scan Begin  | 50 m/z                 | Set End Plate Offset  | -500 V              |
| Scan End    | 3000 m/z               | Set Collision Cell RF | 600.0 Vpp           |
|             |                        | Set Nebulizer         | 0.3 Bar             |
|             |                        | Set Dry Heater        | 180 °C              |
|             |                        | Set Dry Gas           | 4.0 l/min           |
|             |                        | Set Divert Valve      | Source              |

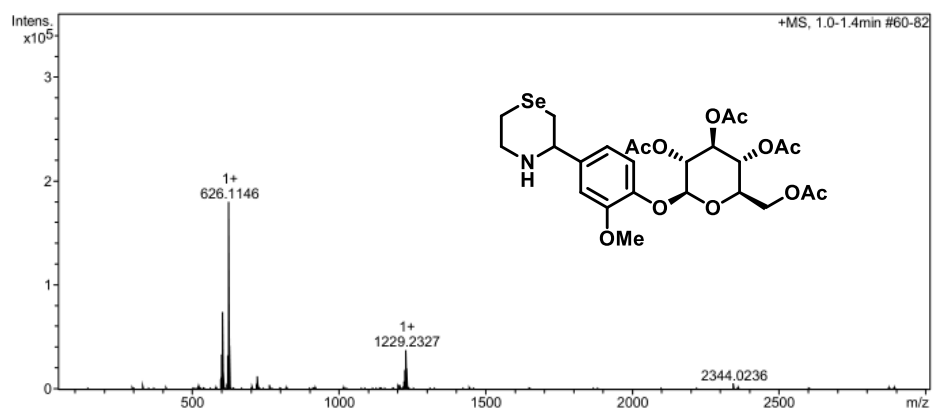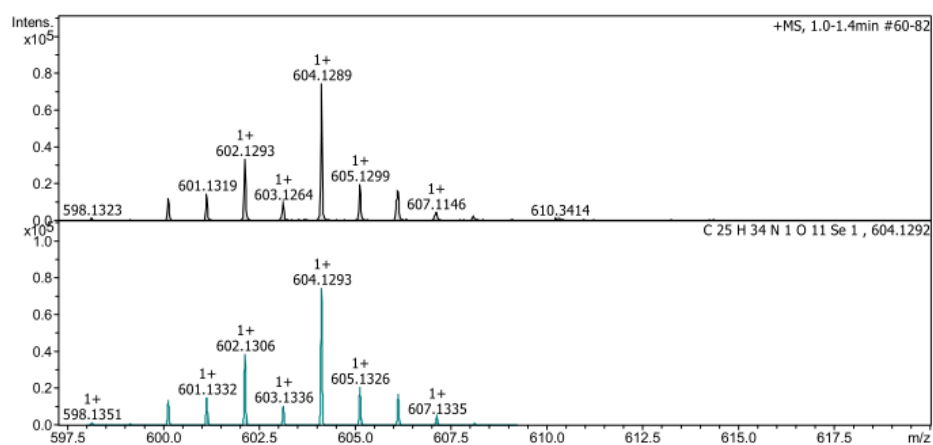



## Evaluation Spectra / Validation Formula:

| Meas. m/z  | # | Ion Formula  | Score  | m/z        | err [mDa] | err [ppm] | mSigma | rdb | e <sup>-</sup> Conf | N-Rule | Adduct |
|------------|---|--------------|--------|------------|-----------|-----------|--------|-----|---------------------|--------|--------|
| 604.128863 | 1 | C25H34NO11Se | 100.00 | 604.129364 | 0.5       | 0.8       | 22.8   | 9.5 | even                | ok     | M+H    |

## Calibration Info:

Date: 6/13/2019 10:14:59 AM  
Polarity: Positive  
Calibration spectrum: +MS, 4.5-4.6min #269-276: Scan  
Reference mass list: ESI: Tuning Mix ES-TOF (ESI) (pos)  
Calibration mode: Enhanced Quadratic

| Reference m/z | Resulting m/z | Intensity | Error [ppm] |
|---------------|---------------|-----------|-------------|
| 118.0863      |               |           |             |
| 322.0481      | 322.0482      | 331       | 0.295       |
| 622.0290      | 622.0288      | 13502     | -0.332      |
| 922.0098      | 922.0086      | 34780     | -1.261      |
| 1221.9906     | 1221.9919     | 43655     | 1.038       |
| 1521.9715     | 1521.9730     | 46704     | 1.009       |
| 1821.9523     | 1821.9533     | 31016     | 0.540       |
| 2121.9332     | 2121.9330     | 36228     | -0.079      |
| 2421.9140     | 2421.9063     | 9215      | -3.158      |
| 2721.8948     | 2721.9001     | 2219      | 1.948       |

Standard deviation: 1.954

## Mass List:

| #  | m/z       | Res.  | S/N    | I %   | FWHM   |
|----|-----------|-------|--------|-------|--------|
| 1  | 331.1030  | 13543 | 355.8  | 1.9   | 0.0244 |
| 2  | 524.0776  | 12269 | 174.1  | 1.6   | 0.0427 |
| 3  | 600.1303  | 12714 | 614.2  | 7.0   | 0.0472 |
| 4  | 601.1319  | 13954 | 710.3  | 8.1   | 0.0431 |
| 5  | 602.1293  | 13371 | 1626.9 | 18.6  | 0.0450 |
| 6  | 603.1264  | 11489 | 468.2  | 5.4   | 0.0525 |
| 7  | 604.1289  | 15059 | 3611.9 | 41.3  | 0.0401 |
| 8  | 605.1299  | 12917 | 959.5  | 11.0  | 0.0468 |
| 9  | 606.1129  | 7474  | 769.4  | 8.9   | 0.0811 |
| 10 | 607.1146  | 7336  | 218.0  | 2.5   | 0.0828 |
| 11 | 620.1148  | 12236 | 127.9  | 1.5   | 0.0507 |
| 12 | 622.1138  | 14626 | 1347.9 | 16.2  | 0.0425 |
| 13 | 623.1157  | 14849 | 1519.6 | 18.4  | 0.0420 |
| 14 | 624.1150  | 17548 | 4067.0 | 49.3  | 0.0356 |
| 15 | 625.1167  | 13542 | 967.2  | 11.8  | 0.0462 |
| 16 | 626.1146  | 20201 | 8214.6 | 100.0 | 0.0310 |
| 17 | 627.1146  | 13899 | 1890.4 | 23.1  | 0.0451 |
| 18 | 628.1111  | 14255 | 1660.9 | 20.3  | 0.0441 |
| 19 | 629.1132  | 13442 | 426.7  | 5.2   | 0.0468 |
| 20 | 722.1086  | 12311 | 218.5  | 3.2   | 0.0587 |
| 21 | 724.1068  | 14400 | 461.4  | 6.8   | 0.0503 |
| 22 | 725.1126  | 13486 | 135.2  | 2.0   | 0.0538 |
| 23 | 726.1075  | 14627 | 120.4  | 1.8   | 0.0496 |
| 24 | 763.2304  | 34755 | 149.8  | 2.3   | 0.0220 |
| 25 | 1205.2529 | 13233 | 113.7  | 2.3   | 0.0911 |
| 26 | 1207.2454 | 13960 | 130.6  | 2.6   | 0.0865 |
| 27 | 1222.2383 | 12713 | 70.3   | 1.4   | 0.0961 |
| 28 | 1223.2365 | 14237 | 213.3  | 4.3   | 0.0859 |
| 29 | 1224.2335 | 14516 | 236.2  | 4.8   | 0.0843 |
| 30 | 1225.2340 | 14181 | 506.1  | 10.3  | 0.0864 |
| 31 | 1226.2365 | 14592 | 496.1  | 10.1  | 0.0840 |
| 32 | 1227.2350 | 16792 | 998.7  | 20.4  | 0.0731 |
| 33 | 1228.2357 | 14874 | 543.2  | 11.1  | 0.0826 |
| 34 | 1229.2327 | 15987 | 1034.4 | 21.1  | 0.0769 |
| 35 | 1230.2339 | 15262 | 549.9  | 11.2  | 0.0806 |
| 36 | 1231.2363 | 13224 | 401.8  | 8.2   | 0.0931 |
| 37 | 1232.2348 | 15938 | 237.4  | 4.8   | 0.0773 |
| 38 | 1233.2348 | 14092 | 99.0   | 2.0   | 0.0875 |
| 39 | 2344.0236 | 26281 | 264.3  | 2.9   | 0.0892 |
| 40 | 2344.6524 | 23156 | 128.2  | 1.4   | 0.1013 |
| #  | m/z       | Res.  | S/N    | I %   | FWHM   |
| 1  | 598.1351  | 14910 |        | 1.7   | 0.0401 |
| 2  | 599.1385  | 14935 |        | 0.5   | 0.0401 |
| 3  | 600.1319  | 14959 |        | 18.4  | 0.0401 |
| 4  | 601.1332  | 14984 |        | 20.1  | 0.0401 |



RAJAVEL/ZHOU GUAN

---

| #  | m/z      | Res.  | S/N | I %   | FWHM   |
|----|----------|-------|-----|-------|--------|
| 5  | 602.1306 | 15009 |     | 51.8  | 0.0401 |
| 6  | 603.1336 | 15034 |     | 14.2  | 0.0401 |
| 7  | 604.1293 | 15059 |     | 100.0 | 0.0401 |
| 8  | 605.1326 | 15084 |     | 27.8  | 0.0401 |
| 9  | 606.1308 | 15109 |     | 23.0  | 0.0401 |
| 10 | 607.1335 | 15134 |     | 5.8   | 0.0401 |
| 11 | 608.1351 | 15159 |     | 1.1   | 0.0401 |
| 12 | 609.1369 | 15184 |     | 0.2   | 0.0401 |



# Compound 8c

RAJAVEL/ZHOU GUAN

|             |                        |                       |                     |
|-------------|------------------------|-----------------------|---------------------|
| Method:     | 20190603-50_3000-pos.m | Acquisition Date:     | 6/5/2019 6:48:06 PM |
| File Name:  | D:\Data\IAC            | Operator:             | Shuyang Yang / XZ   |
| Source Type | ESI                    | Ion Polarity          | Positive            |
| Focus       | Active                 | Set Capillary         | 3500 V              |
| Scan Begin  | 50 m/z                 | Set End Plate Offset  | -500 V              |
| Scan End    | 3000 m/z               | Set Collision Cell RF | 600.0 Vpp           |
|             |                        | Set Nebulizer         | 0.3 Bar             |
|             |                        | Set Dry Heater        | 180 °C              |
|             |                        | Set Dry Gas           | 4.0 l/min           |
|             |                        | Set Divert Valve      | Source              |

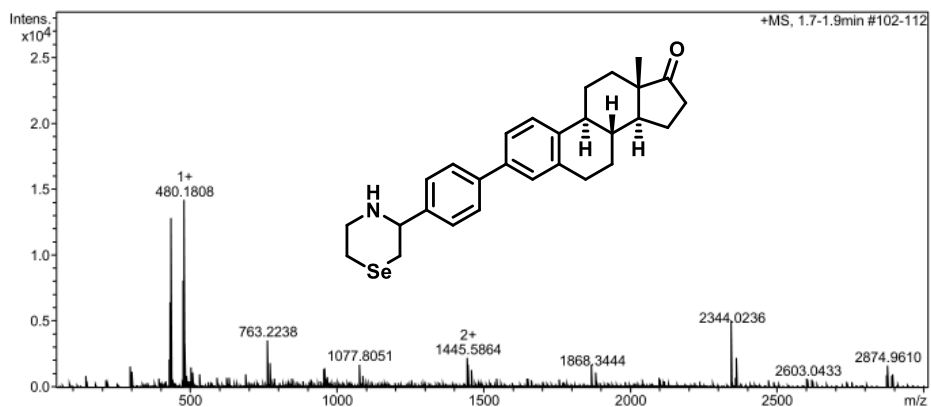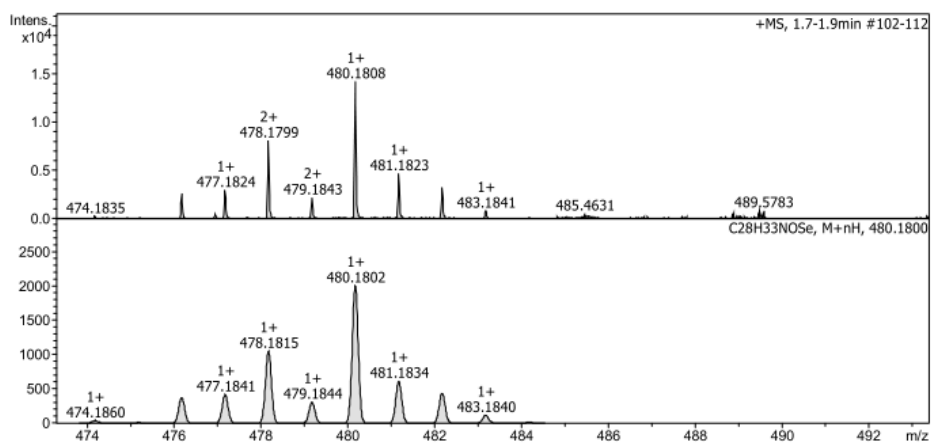



## Evaluation Spectra / Validation Formula:

| Meas. m/z  | # | Ion Formula   | Score  | m/z        | err [mDa] | err [ppm] | mSigma | rdb  | e <sup>-</sup> Conf | N-Rule | Adduct |
|------------|---|---------------|--------|------------|-----------|-----------|--------|------|---------------------|--------|--------|
| 480.180752 | 1 | C28H34NOSe    | 100.00 | 480.180191 | 0.6       | 1.2       | 15.9   | 12.5 | even                | ok     | M+H    |
|            | 2 | C16H38N3O8Se  | 26.72  | 480.181967 | 1.2       | 2.5       | 53.2   | -0.5 | even                | ok     | M+H    |
|            | 3 | C13H30N13O2Se | 44.83  | 480.180564 | -0.2      | -0.4      | 53.7   | 5.5  | even                | ok     | M+H    |
|            | 4 | C12H34N9O6Se  | 16.93  | 480.179244 | 1.5       | 3.1       | 61.4   | 0.5  | even                | ok     | M+H    |

## Calibration Info:

Date: 6/13/2019 10:07:56 AM  
Polarity: Positive  
Calibration spectrum: +MS, 4.5-4.7min #270-277: Scan  
Reference mass list: ESI: Tuning Mix ES-TOF (ESI) (pos)  
Calibration mode: Enhanced Quadratic

| Reference m/z | Resulting m/z | Intensity | Error [ppm] |
|---------------|---------------|-----------|-------------|
| 118.0863      |               |           |             |
| 322.0481      | 322.0483      | 461       | 0.438       |
| 622.0290      | 622.0285      | 17640     | -0.756      |
| 922.0098      | 922.0087      | 45900     | -1.139      |
| 1221.9906     | 1221.9922     | 55370     | 1.250       |
| 1521.9715     | 1521.9735     | 64426     | 1.343       |
| 1821.9523     | 1821.9527     | 41895     | 0.238       |
| 2121.9332     | 2121.9329     | 44155     | -0.132      |
| 2421.9140     | 2421.9056     | 10446     | -3.451      |
| 2721.8948     | 2721.9008     | 2121      | 2.208       |

Standard deviation: 2.178

## Mass List:

| #  | m/z       | Res.  | S/N    | I %   | FWHM   |
|----|-----------|-------|--------|-------|--------|
| 1  | 296.9538  | 23616 | 169.0  | 9.2   | 0.0126 |
| 2  | 297.1672  | 25968 | 203.0  | 11.1  | 0.0114 |
| 3  | 302.9920  | 26962 | 152.4  | 8.5   | 0.0112 |
| 4  | 431.1252  | 12528 | 200.0  | 15.0  | 0.0344 |
| 5  | 432.1261  | 12459 | 228.5  | 17.1  | 0.0347 |
| 6  | 433.1215  | 13049 | 607.3  | 45.6  | 0.0332 |
| 7  | 434.1269  | 12936 | 178.2  | 13.4  | 0.0336 |
| 8  | 435.1218  | 12835 | 1200.9 | 90.3  | 0.0339 |
| 9  | 436.1255  | 13773 | 360.5  | 27.1  | 0.0317 |
| 10 | 437.1244  | 10840 | 235.7  | 17.8  | 0.0403 |
| 11 | 476.1831  | 12840 | 230.2  | 18.7  | 0.0371 |
| 12 | 477.1824  | 12058 | 257.0  | 20.9  | 0.0396 |
| 13 | 478.1799  | 12998 | 698.4  | 56.9  | 0.0368 |
| 14 | 479.1843  | 12892 | 191.2  | 15.6  | 0.0372 |
| 15 | 480.1808  | 12825 | 1225.6 | 100.0 | 0.0374 |
| 16 | 481.1823  | 13123 | 403.3  | 32.9  | 0.0367 |
| 17 | 482.1809  | 12539 | 282.7  | 23.1  | 0.0385 |
| 18 | 503.0843  | 24744 | 85.5   | 7.2   | 0.0203 |
| 19 | 503.3587  | 31461 | 129.1  | 10.9  | 0.0160 |
| 20 | 534.9590  | 13255 | 80.5   | 7.1   | 0.0404 |
| 21 | 690.9581  | 15413 | 66.5   | 7.0   | 0.0448 |
| 22 | 763.2238  | 37027 | 222.9  | 25.3  | 0.0206 |
| 23 | 763.5763  | 13894 | 115.8  | 13.1  | 0.0550 |
| 24 | 772.9305  | 32608 | 113.3  | 12.9  | 0.0237 |
| 25 | 957.3547  | 14166 | 71.6   | 9.9   | 0.0676 |
| 26 | 959.3485  | 13689 | 74.4   | 10.3  | 0.0701 |
| 27 | 1077.8051 | 43657 | 80.0   | 12.2  | 0.0247 |
| 28 | 1088.9186 | 52014 | 40.6   | 6.2   | 0.0209 |
| 29 | 1445.5864 | 39947 | 82.7   | 15.8  | 0.0362 |
| 30 | 1446.0677 | 18652 | 64.0   | 12.3  | 0.0775 |
| 31 | 1458.4283 | 53224 | 33.6   | 6.4   | 0.0274 |
| 32 | 1458.9103 | 44530 | 48.5   | 9.3   | 0.0328 |
| 33 | 1867.8095 | 13317 | 36.9   | 6.9   | 0.1403 |
| 34 | 1868.3444 | 21055 | 51.5   | 9.7   | 0.0887 |
| 35 | 1882.9685 | 47697 | 43.7   | 8.2   | 0.0395 |
| 36 | 2344.0236 | 60533 | 246.7  | 32.7  | 0.0387 |
| 37 | 2344.6522 | 24173 | 172.4  | 22.9  | 0.0970 |
| 38 | 2360.3662 | 70843 | 49.3   | 6.5   | 0.0333 |
| 39 | 2874.9610 | 70561 | 134.4  | 11.5  | 0.0407 |
| 40 | 2892.3649 | 81974 | 74.4   | 6.3   | 0.0353 |
| #  | m/z       | Res.  | S/N    | I %   | FWHM   |
| 1  | 474.1860  | 3075  |        | 1.8   | 0.1542 |



RAJAVEL/ZHOU GUAN

| #  | m/z      | Res. | S/N | I %   | FWHM   |
|----|----------|------|-----|-------|--------|
| 2  | 475.1693 | 3062 |     | 0.5   | 0.1542 |
| 3  | 476.1827 | 3088 |     | 18.5  | 0.1542 |
| 4  | 477.1841 | 3095 |     | 20.8  | 0.1542 |
| 5  | 478.1815 | 3101 |     | 52.3  | 0.1542 |
| 6  | 479.1844 | 3108 |     | 15.3  | 0.1542 |
| 7  | 480.1802 | 3114 |     | 100.0 | 0.1542 |
| 8  | 481.1834 | 3121 |     | 30.6  | 0.1542 |
| 9  | 482.1816 | 3127 |     | 21.9  | 0.1542 |
| 10 | 483.1840 | 3133 |     | 5.8   | 0.1542 |
| 11 | 484.1869 | 3140 |     | 0.8   | 0.1542 |



# Compound 8d

RAJAVEL/ZHOU GUAN

|             |                                                   |                       |                     |
|-------------|---------------------------------------------------|-----------------------|---------------------|
| Method:     | 20190603-50_3000-pos.m                            | Acquisition Date:     | 6/5/2019 6:36:34 PM |
| File Name:  | D:\Data\IAC                                       | Operator:             | Shuyang Yang / XZ   |
| Source Type | TEST\YSY\20190605\ZHOU GUAN-2\24_P1-B-7_01_8992.d |                       |                     |
| Focus       | ESI                                               | Ion Polarity          | Positive            |
| Scan Begin  | Active                                            | Set Capillary         | 3500 V              |
| Scan End    | 50 m/z                                            | Set End Plate Offset  | -500 V              |
|             | 3000 m/z                                          | Set Collision Cell RF | 600.0 Vpp           |
|             |                                                   | Set Nebulizer         | 0.3 Bar             |
|             |                                                   | Set Dry Heater        | 180 °C              |
|             |                                                   | Set Dry Gas           | 4.0 l/min           |
|             |                                                   | Set Divert Valve      | Source              |

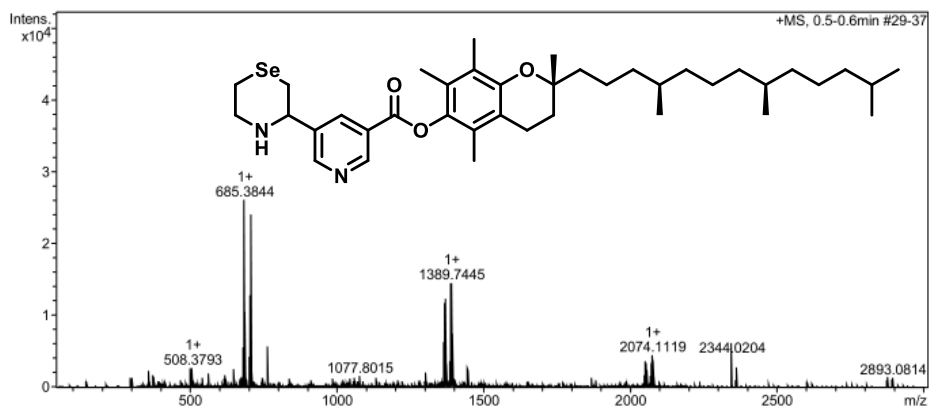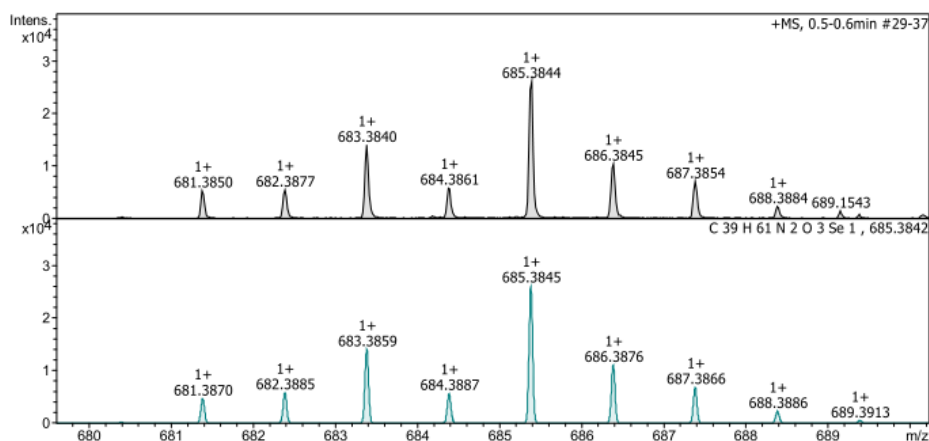



## Evaluation Spectra / Validation Formula:

| Meas. m/z  | # | Ion Formula                                                      | Score  | m/z        | err [mDa] | err [ppm] | mSigma | rdb  | e <sup>-</sup> Conf | N-Rule | Adduct |
|------------|---|------------------------------------------------------------------|--------|------------|-----------|-----------|--------|------|---------------------|--------|--------|
| 685.384423 | 1 | C <sub>39</sub> H <sub>61</sub> N <sub>2</sub> O <sub>3</sub> Se | 100.00 | 685.384555 | -0.1      | -0.2      | 11.8   | 10.5 | even                | ok     | M+H    |

## Calibration Info:

Date: 6/13/2019 9:55:27 AM  
Polarity: Positive  
Calibration spectrum: +MS, 4.5-4.6min #270-276: Scan  
Reference mass list: ESI: Tuning Mix ES-TOF (ESI) (pos)  
Calibration mode: Enhanced Quadratic

| Reference m/z | Resulting m/z | Intensity | Error [ppm] |
|---------------|---------------|-----------|-------------|
| 118.0863      |               |           |             |
| 322.0481      | 322.0483      | 388       | 0.620       |
| 622.0290      | 622.0280      | 15153     | -1.470      |
| 922.0098      | 922.0094      | 41384     | -0.416      |
| 1221.9906     | 1221.9921     | 49441     | 1.229       |
| 1521.9715     | 1521.9732     | 55484     | 1.156       |
| 1821.9523     | 1821.9532     | 37553     | 0.467       |
| 2121.9332     | 2121.9324     | 45641     | -0.365      |
| 2421.9140     | 2421.9052     | 11689     | -3.620      |
| 2721.8948     | 2721.9014     | 2676      | 2.398       |

Standard deviation: 2.296

## Mass List:

| #  | m/z       | Res.  | S/N   | I %   | FWHM   |
|----|-----------|-------|-------|-------|--------|
| 1  | 681.3850  | 14123 | 160.8 | 20.4  | 0.0482 |
| 2  | 682.3877  | 12175 | 167.3 | 21.3  | 0.0560 |
| 3  | 683.3840  | 13203 | 421.6 | 53.7  | 0.0518 |
| 4  | 684.3861  | 13044 | 177.1 | 22.5  | 0.0525 |
| 5  | 685.3844  | 13814 | 784.0 | 100.0 | 0.0496 |
| 6  | 686.3845  | 11960 | 314.8 | 40.2  | 0.0574 |
| 7  | 687.3854  | 12648 | 211.2 | 27.0  | 0.0543 |
| 8  | 703.3650  | 12840 | 123.4 | 16.3  | 0.0548 |
| 9  | 704.3673  | 13222 | 155.5 | 20.6  | 0.0533 |
| 10 | 705.3662  | 13597 | 370.8 | 49.1  | 0.0519 |
| 11 | 706.3667  | 11181 | 137.2 | 18.2  | 0.0632 |
| 12 | 707.3667  | 14935 | 694.6 | 92.3  | 0.0474 |
| 13 | 708.3663  | 13459 | 298.3 | 39.7  | 0.0526 |
| 14 | 709.3651  | 12623 | 182.7 | 24.4  | 0.0562 |
| 15 | 763.2074  | 9189  | 103.6 | 14.9  | 0.0831 |
| 16 | 1365.7615 | 12669 | 125.3 | 24.4  | 0.1078 |
| 17 | 1366.7649 | 12724 | 140.6 | 27.4  | 0.1074 |
| 18 | 1367.7593 | 13811 | 231.3 | 45.0  | 0.0990 |
| 19 | 1368.7623 | 13004 | 167.8 | 32.7  | 0.1053 |
| 20 | 1369.7612 | 13016 | 241.9 | 47.1  | 0.1052 |
| 21 | 1370.7591 | 13915 | 177.2 | 34.5  | 0.0985 |
| 22 | 1371.7623 | 11299 | 114.7 | 22.3  | 0.1214 |
| 23 | 1372.7631 | 11080 | 64.4  | 12.5  | 0.1239 |
| 24 | 1386.7458 | 13088 | 71.0  | 13.8  | 0.1060 |
| 25 | 1387.7412 | 14235 | 153.2 | 29.8  | 0.0975 |
| 26 | 1388.7425 | 12631 | 158.7 | 30.9  | 0.1099 |
| 27 | 1389.7445 | 15107 | 286.4 | 55.8  | 0.0920 |
| 28 | 1390.7446 | 13562 | 201.0 | 39.1  | 0.1025 |
| 29 | 1391.7416 | 14318 | 285.1 | 55.5  | 0.0972 |
| 30 | 1392.7454 | 13847 | 204.4 | 39.8  | 0.1006 |
| 31 | 1393.7444 | 13446 | 149.1 | 29.0  | 0.1037 |
| 32 | 1394.7437 | 14078 | 86.1  | 16.8  | 0.0991 |
| 33 | 2052.1351 | 13940 | 110.5 | 13.8  | 0.1472 |
| 34 | 2053.1301 | 13019 | 96.8  | 12.1  | 0.1577 |
| 35 | 2054.1280 | 14606 | 104.0 | 13.0  | 0.1406 |
| 36 | 2073.1179 | 15498 | 112.5 | 13.9  | 0.1338 |
| 37 | 2074.1119 | 14991 | 138.0 | 17.0  | 0.1384 |
| 38 | 2075.1128 | 11228 | 102.2 | 12.6  | 0.1848 |
| 39 | 2076.1167 | 14453 | 118.6 | 14.6  | 0.1436 |
| 40 | 2344.0204 | 21349 | 185.9 | 16.7  | 0.1098 |
| #  | m/z       | Res.  | S/N   | I %   | FWHM   |
| 1  | 679.3901  | 13693 |       | 1.7   | 0.0496 |
| 2  | 680.3935  | 13713 |       | 0.7   | 0.0496 |
| 3  | 681.3870  | 13733 |       | 18.2  | 0.0496 |
| 4  | 682.3885  | 13754 |       | 22.5  | 0.0496 |



RAJAVEL/ZHOU GUAN

| #  | m/z      | Res.  | S/N | I %   | FWHM   |
|----|----------|-------|-----|-------|--------|
| 5  | 683.3859 | 13774 |     | 53.8  | 0.0496 |
| 6  | 684.3887 | 13794 |     | 21.7  | 0.0496 |
| 7  | 685.3845 | 13814 |     | 100.0 | 0.0496 |
| 8  | 686.3876 | 13834 |     | 42.4  | 0.0496 |
| 9  | 687.3866 | 13854 |     | 26.3  | 0.0496 |
| 10 | 688.3886 | 13875 |     | 8.8   | 0.0496 |
| 11 | 689.3913 | 13895 |     | 1.8   | 0.0496 |
| 12 | 690.3944 | 13915 |     | 0.3   | 0.0496 |
